# Supplementary material for: Cancer histone H2A.Z missense mutations disrupt function through distinct local and allosteric effects
Source: Research Square preprint supplement (doi:10.21203/rs.3.rs-8484515/v1), 2026-01-12
Supplement: Supplementary file 1 [file d482596d6ac9c54aff7b92de.xlsx]

## Sheet: Supplementary Table S1
Protein	Wild type allele	Position	Mutant allele
H2A.Z.1	A	1	G
H2A.Z.1	K	4	N
H2A.Z.1	K	7	N
H2A.Z.1	D	8	N
H2A.Z.1	G	10	E
H2A.Z.2	A	16	T
H2A.Z.2	R	19	L
H2A.Z.1	S	20	L
H2A.Z.2	F	27	Y
H2A.Z.1	R	31	H
H2A.Z.2	R	31	H
H2A.Z.1	S	38	Y
H2A.Z.2	R	39	H
H2A.Z.1	T	40	K
H2A.Z.1	T	41	S
H2A.Z.1	S	42	I
H2A.Z.1	S	42	C
H2A.Z.2	G	44	E
H2A.Z.1	A	51	V
H2A.Z.2	A	51	V
H2A.Z.1	A	55	P
H2A.Z.2	L	61	F
H2A.Z.2	T	62	A
H2A.Z.2	N	71	D
H2A.Z.1	A	72	T
H2A.Z.2	L	76	I
H2A.Z.2	L	76	V
H2A.Z.1	R	80	C
H2A.Z.2	R	80	C
H2A.Z.2	P	83	A
H2A.Z.2	R	84	L
H2A.Z.1	L	96	W
H2A.Z.2	S	98	Y
H2A.Z.2	L	99	R
H2A.Z.1	I	104	S
H2A.Z.1	G	108	C
H2A.Z.2	I	110	M
H2A.Z.1	H	112	R
H2A.Z.1	S	116	F

## Sheet: Supplementary Table S2
Human mutation	Budding yeast equivalent	Region
H2A.Z.1 K4N	H2A.Z K3N	N-tail
H2A.Z.1 S20L	H2A.Z S25L	N-tail
H2A.Z.2 F27Y	H2A.Z F32Y	α1
H2A.Z.1/2 R31H	H2A.Z R36H	α1
H2A.Z.1 T41S	H2A.Z T46S	Loop 1
H2A.Z.1/2 A51V	H2A.Z A56V	α2
H2A.Z.2 L61F	H2A.Z L66F	α2
H2A.Z.2 T62A	H2A.Z T67A	α2
H2A.Z.2 N71D	H2A.Z N76D	α2
H2A.Z.1 A72T	H2A.Z A77T	α2
H2A.Z.2 L76I	H2A.Z L81I	Loop 2
H2A.Z.2 L76V	H2A.Z L81V	Loop 2
H2A.Z.1/2 R80C	H2A.Z R85C	L2/α3
H2A.Z.2 P83A	H2A.Z P88A	α3
H2A.Z.2 R84L	H2A.Z R89L	α3
H2A.Z.1 L96W	H2A.Z L101W	M6
H2A.Z.2 S98Y	H2A.Z S103Y	M6
H2A.Z.2 L99R	H2A.Z L104R	M6
H2A.Z.1 I104S	H2A.Z I109S	C-tail
H2A.Z.1 G108C	H2A.Z G113C	C-tail
H2A.Z.1 H112R	H2A.Z H117R	C-tail

## Sheet: Supplementary Table S3
Sample	Before_total_reads	Before_q30_rate	Before_gc_content	After_total_reads	After_q30_rate	After_gc_content
EV_input_1	29956952	0.961498	0.392553	29788146	0.964813	0.391293
EV_input_2	27637248	0.957396	0.393112	27462304	0.961135	0.391563
EV_input_3	29960316	0.959278	0.391911	29784868	0.962801	0.390558
EV_iP_1	31469422	0.963049	0.382642	31307924	0.966535	0.380405
EV_iP_2	25502000	0.960584	0.392646	25359478	0.964568	0.390255
EV_iP_3	26024002	0.958824	0.385577	25873030	0.962791	0.383215
WT_input_1	27460694	0.959417	0.39539	27306182	0.96275	0.394084
WT_input_2	29802780	0.961726	0.393876	29623478	0.965372	0.392255
WT_input_3	30396962	0.956727	0.394547	30200196	0.960619	0.39289
WT_iP_1	29265798	0.957665	0.396745	29074186	0.961778	0.394754
WT_iP_2	30059364	0.9606	0.395758	29874902	0.964402	0.394075
WT_iP_3	27769544	0.95437	0.395402	27561900	0.958651	0.393976
R36H_input_1	29664002	0.959206	0.395906	29468446	0.963063	0.394261
R36H_input_2	28023228	0.960396	0.393667	27873116	0.963642	0.39231
R36H_input_3	24276658	0.955296	0.392452	24123376	0.959022	0.391016
R36H_iP_1	27925092	0.959874	0.396935	27751026	0.963607	0.395367
R36H_iP_2	29574978	0.945169	0.398854	29269174	0.95086	0.397026
R36H_iP_3	29193182	0.955034	0.393124	28981470	0.959196	0.391685
T46S_input1	44779534	0.97054	0.401084	44526452	0.973521	0.399514
T46S_input2	37994498	0.969143	0.39594	37781532	0.972112	0.39458
T46S_input3	37897214	0.968329	0.394039	37691436	0.971182	0.392848
T46S_ip1	42032206	0.970013	0.399014	41783162	0.973187	0.397709
T46S_ip2	40007996	0.968782	0.394286	39795654	0.971585	0.392849
T46S_ip3	36780102	0.968427	0.393098	36561404	0.971559	0.392004
L66F_input1	47637292	0.970229	0.39655	47365784	0.97325	0.395073
L66F_input2	37882926	0.968969	0.398698	37674318	0.971873	0.397395
L66F_input3	37567428	0.969843	0.393577	37359060	0.972923	0.392157
L66F_ip1	43563894	0.970142	0.400264	43312314	0.973202	0.398853
L66F_ip2	44243434	0.969525	0.400766	43980422	0.972724	0.399361
L66F_ip3	32560850	0.967628	0.394404	32364140	0.970776	0.393042
L101W_input1	34449378	0.969703	0.399637	34268906	0.972726	0.397816
L101W_input2	41733966	0.971434	0.392232	41503938	0.9743	0.390926
L101W_input3	39754036	0.969541	0.394712	39542366	0.972438	0.393077
L101W_ip1	39352080	0.97001	0.397086	39138030	0.972872	0.39578
L101W_ip2	37871646	0.969597	0.39349	37649290	0.972693	0.392401
L101W_ip3	40375570	0.969558	0.39658	40153576	0.972439	0.395501
L104R_input_1	32094386	0.959362	0.394453	31900820	0.962962	0.39298
L104R_input_2	31687542	0.944331	0.393693	31324152	0.95049	0.392199
L104R_input_3	30863624	0.961122	0.390875	30679430	0.964629	0.389545
L104R_iP_1	25736714	0.945543	0.400134	25470160	0.951383	0.398152
L104R_iP_2	24448120	0.953076	0.399357	24245522	0.957755	0.397903
L104R_iP_3	22949584	0.950297	0.396092	22739108	0.955299	0.394577
I109S_input_1	30559990	0.958545	0.38963	30369576	0.9621	0.388238
I109S_input_2	31053606	0.958172	0.392834	30863086	0.961808	0.391584
I109S_input_3	26107098	0.957919	0.390779	25941120	0.961707	0.389414
I109S_iP_1	29808094	0.960633	0.403317	29627712	0.964782	0.401107
I109S_iP_2	28080562	0.960184	0.414013	27900782	0.96422	0.412313
I109S_iP_3	24804822	0.950952	0.397018	24590488	0.955897	0.395446

## Sheet: Supplementary Table S4
Sample	Species	Total reads number	Ratio	Scale factor
EV_input_1	S. cerevisiae	23850378	0.0477396
EV_input_1	S. pombe	1195688		0.836339
EV_input_2	S. cerevisiae	22356948	0.0342075
EV_input_2	S. pombe	791862		1.26285
EV_input_3	S. cerevisiae	24517934	0.0274279
EV_input_3	S. pombe	691440		1.44626
EV_iP_1	S. cerevisiae	3751502	0.857606
EV_iP_1	S. pombe	22594464		0.0529195
EV_iP_2	S. cerevisiae	2610556	0.866441
EV_iP_2	S. pombe	16935582		0.0467573
EV_iP_3	S. cerevisiae	3375524	0.845652
EV_iP_3	S. pombe	18494088		0.0373871
WT_input_1	S. cerevisiae	20694338	0.0970689
WT_input_1	S. pombe	2224728		0.449493
WT_input_2	S. cerevisiae	22777556	0.0682682
WT_input_2	S. pombe	1668916		0.599191
WT_input_3	S. cerevisiae	22846428	0.0774136
WT_input_3	S. pombe	1917028		0.521641
WT_iP_1	S. cerevisiae	22940834	0.0157096
WT_iP_1	S. pombe	366144		6.0761
WT_iP_2	S. cerevisiae	23889584	0.0148486
WT_iP_2	S. pombe	360074		4.63493
WT_iP_3	S. cerevisiae	21527286	0.0171424
WT_iP_3	S. pombe	375466		5.10573
R36H_input_1	S. cerevisiae	22250348	0.0663707
R36H_input_1	S. pombe	1581754		0.63221
R36H_input_2	S. cerevisiae	22561182	0.0521507
R36H_input_2	S. pombe	1241316		0.805597
R36H_input_3	S. cerevisiae	19625332	0.0391048
R36H_input_3	S. pombe	798676		1.25207
R36H_iP_1	S. cerevisiae	21536980	0.0384084
R36H_iP_1	S. pombe	860242		1.83873
R36H_iP_2	S. cerevisiae	23548180	0.02724
R36H_iP_2	S. pombe	659416		1.88245
R36H_iP_3	S. cerevisiae	22808804	0.0222176
R36H_iP_3	S. pombe	518272		1.54104
T46S_input_1	S. cerevisiae	31172968	0.0955881
T46S_input_1	S. pombe	3294700		0.303518
T46S_input_2	S. cerevisiae	29499864	0.0628098
T46S_input_2	S. pombe	1977060		0.505802
T46S_input_3	S. cerevisiae	30428026	0.0484306
T46S_input_3	S. pombe	1548648		0.645725
T46S_iP_1	S. cerevisiae	29913140	0.0707587
T46S_iP_1	S. pombe	2277788		1.44645
T46S_iP_2	S. cerevisiae	31457790	0.0418767
T46S_iP_2	S. pombe	1374926		1.43794
T46S_iP_3	S. cerevisiae	29358600	0.0234809
T46S_iP_3	S. pombe	705942		2.19373
L66F_input_1	S. cerevisiae	35159390	0.0589834
L66F_input_1	S. pombe	2203810		0.45376
L66F_input_2	S. cerevisiae	28569836	0.070769
L66F_input_2	S. pombe	2175842		0.459592
L66F_input_3	S. cerevisiae	29568972	0.0484757
L66F_input_3	S. pombe	1506402		0.663833
L66F_iP_1	S. cerevisiae	31056648	0.0713574
L66F_iP_1	S. pombe	2386408		0.923484
L66F_iP_2	S. cerevisiae	30810736	0.0955943
L66F_iP_2	S. pombe	3256648		0.668123
L66F_iP_3	S. cerevisiae	24601486	0.0539213
L66F_iP_3	S. pombe	1402150		1.07435
L101W_input_1	S. cerevisiae	26786954	0.0606788
L101W_input_1	S. pombe	1730400		0.577901
L101W_input_2	S. cerevisiae	32745232	0.0371129
L101W_input_2	S. pombe	1262110		0.792324
L101W_input_3	S. cerevisiae	31596440	0.0481374
L101W_input_3	S. pombe	1597890		0.625825
L101W_iP_1	S. cerevisiae	29947240	0.0507958
L101W_iP_1	S. pombe	1602600		1.07975
L101W_iP_2	S. cerevisiae	29175666	0.035178
L101W_iP_2	S. pombe	1063764		1.18646
L101W_iP_3	S. cerevisiae	31355162	0.0406712
L101W_iP_3	S. pombe	1329316		1.20204
L104R_input_1	S. cerevisiae	25219948	0.0413137
L104R_input_1	S. pombe	1086830		0.920107
L104R_input_2	S. cerevisiae	24784970	0.0540733
L104R_input_2	S. pombe	1416818		0.705807
L104R_input_3	S. cerevisiae	24277056	0.036626
L104R_input_3	S. pombe	922976		1.08345
L104R_iP_1	S. cerevisiae	16695050	0.184849
L104R_iP_1	S. pombe	3785884		0.287074
L104R_iP_2	S. cerevisiae	17098674	0.103043
L104R_iP_2	S. pombe	1964300		0.721284
L104R_iP_3	S. cerevisiae	15961184	0.0786064
L104R_iP_3	S. pombe	1361688		0.677818
I109S_input_1	S. cerevisiae	22253400	0.051493
I109S_input_1	S. pombe	1208102		0.827745
I109S_input_2	S. cerevisiae	25053528	0.0388799
I109S_input_2	S. pombe	1013482		0.986697
I109S_input_3	S. cerevisiae	20762762	0.0294518
I109S_input_3	S. pombe	630056		1.58716
I109S_iP_1	S. cerevisiae	21312722	0.103345
I109S_iP_1	S. pombe	2456424		0.491813
I109S_iP_2	S. cerevisiae	19973844	0.0815597
I109S_iP_2	S. pombe	1773726		0.571386
I109S_iP_3	S. cerevisiae	17606046	0.0704256
I109S_iP_3	S. pombe	1333854		0.472358

## Sheet: Supplementary Table S5
WT Peaks						R36H Peaks						T46S Peaks						L66F Peaks						L101W Peaks						L104R Peaks						I109S Peaks
Chr	Start	End	log10(qvalue)	Nearest TSS (bp)		Chr	Start	End	log10(qvalue)	Nearest TSS (bp)		Chr	Start	End	log10(qvalue)	Nearest TSS (bp)		Chr	Start	End	log10(qvalue)	Nearest TSS (bp)		Chr	Start	End	log10(qvalue)	Nearest TSS (bp)		Chr	Start	End	log10(qvalue)	Nearest TSS (bp)		Chr	Start	End	log10(qvalue)	Nearest TSS (bp)
chrI	5368	7367	4.33706	2648		chrI	5404	6733	2.8404	2947		chrI	5360	7424	3.3581	2624		chrI	6099	6699	3.05865	2617		chrI	17587	20575	2.83223	-2485		chrI	38854	39504	3.93656	-80		chrI	112462	115119	3.51932	-432
chrI	8700	11598	3.69623	58		chrI	8136	11715	3.70418	-165		chrI	7886	11585	3.5169	-355		chrI	10779	11615	3.05618	754		chrI	21351	25245	2.7608	-613		chrI	54434	55169	3.39896	-13		chrI	165217	165803	3.21424	356
chrI	14411	15217	2.59007	-1071		chrI	17486	20551	3.63065	-2547		chrI	14401	15223	3.23866	-1069		chrI	17887	18445	3.17977	-3400		chrI	36182	37923	2.83487	-135		chrI	56579	57753	2.99073	219		chrII	254792	255168	3.39489	704
chrI	16266	17192	1.95516	-2986		chrI	21321	25372	4.29736	-662		chrI	17454	18399	3.5353	-3639		chrI	22952	25154	3.18804	-1368		chrI	38802	39526	2.85785	-95		chrI	60702	61643	5	-121		chrIII	77477	78609	2.02367	261
chrI	17475	20712	1.92519	-2472		chrI	29489	30958	2.30386	-1343		chrI	18681	20738	3.30506	-1856		chrI	32327	33347	3.16819	-611		chrI	41994	44005	2.93319	823		chrI	62400	63160	4.25558	-60		chrIII	213963	214701	2.69398	-124
chrI	17475	20712	1.92519	-2472		chrI	36126	37882	3.47773	-86		chrI	21150	25168	3.0027	-474		chrI	38772	39499	3.16024	-90		chrI	41994	44005	2.93319	823		chrI	75814	76741	5	-126		chrIV	51998	52485	1.89448	2433
chrI	21132	25181	4.66761	-472		chrI	38834	39470	3.94133	-106		chrI	36192	37792	3.51228	-74		chrI	42070	42561	3.19179	139		chrI	44902	45299	2.86062	-79		chrI	82360	83019	3.3837	-16		chrIV	271664	272305	1.7951	220
chrI	36172	37774	3.718	-55		chrI	42079	44089	3.08244	907		chrI	38848	39474	3.52248	-98		chrI	42961	43943	3.17315	1275		chrI	48409	48789	2.89931	35		chrI	84005	84648	3.71197	147		chrIV	461565	462558	3.98335	-69
chrI	38832	39467	3.61984	-104		chrI	48422	48835	2.89045	65		chrI	42061	42494	3.3394	101		chrI	44934	45298	3.00724	-94		chrI	54379	55243	2.94139	-22		chrI	86731	87683	5	-79		chrIV	1528244	1529574	3.45309	-84
chrI	42075	42543	2.53722	132		chrI	54395	55191	3.57735	-4		chrI	42874	43934	3.28532	1227		chrI	48416	48749	3.15347	19		chrI	56213	57793	2.84631	-146		chrI	92306	93190	3.28125	-152		chrV	441971	442564	3.6011	-449
chrI	42867	43926	2.44931	1220		chrI	56348	58490	3.84808	-34		chrI	44812	45339	3.50175	-54		chrI	54476	55206	3.08317	-52		chrI	60728	61678	2.74242	-113		chrI	99350	100044	5	0		chrVII	536095	536980	2.88933	481
chrI	44789	45337	3.49987	-41		chrI	60767	61607	4.16787	-129		chrI	48409	48793	3.42219	37		chrI	56542	57789	3.2101	219		chrI	62296	63274	2.8791	-55		chrI	100717	101284	3.2493	144		chrVIII	122010	123822	2.40951	-151
chrI	48425	48800	2.06177	49		chrI	62394	63175	4.50396	-55		chrI	54485	55199	3.33223	-53		chrI	60741	61607	3.00817	-122		chrI	79510	80039	2.86963	57		chrI	105650	106129	3.04536	-18		chrIX	3666	4547	3.0739	-72
chrI	54467	55206	3.08297	-48		chrI	75831	76694	4.38854	-111		chrI	56525	57787	3.49412	229		chrI	62377	63127	2.92809	-88		chrI	82306	83095	2.91535	-5		chrI	110139	110553	2.18826	84		chrIX	206909	207847	2.30131	2040
chrI	56514	57806	3.10833	225		chrI	79542	80172	3.67258	-15		chrI	60764	61590	3.50921	-125		chrI	75809	76691	1.70566	-98		chrI	83929	84707	2.92506	156		chrI	113086	113909	3.637	-139		chrIX	378057	378771	3.70933	1743
chrI	60772	61586	3.82198	-127		chrI	82244	83086	3.76368	-41		chrI	62434	63078	3.53262	-84		chrI	82423	83030	3.18098	21		chrI	86682	87707	2.7811	-91		chrI	114282	115260	5	-148		chrX	2543	4842	2.94912	2437
chrI	62405	63076	3.7205	-99		chrI	83948	84663	4.24113	168		chrI	75826	76679	3.04742	-101		chrI	84076	84680	3.0992	96		chrI	92087	93421	2.87695	-146		chrI	119694	120225	3.70595	-265		chrX	478423	478881	2.84245	308
chrI	75817	76676	4.5344	-95		chrI	86756	87706	4.90714	-55		chrI	79520	79974	3.47666	29		chrI	86757	87642	1.90281	-86		chrI	94216	94956	2.94186	-101		chrI	124613	125126	3.87594	-9		chrXII	451486	468850	4.27478	2439
chrI	79526	79982	2.939	36		chrI	92132	93374	4.63568	-147		chrI	82273	83048	3.2424	-45		chrI	92161	93257	3.05895	-191		chrI	99046	100011	2.7227	168		chrI	128773	129589	4.32812	-89		chrXII	489945	490414	4.11243	-226
chrI	82259	83042	3.46173	-55		chrI	94305	95056	3.17616	-6		chrI	84104	84697	3.52509	73		chrI	94332	94879	3.20125	-81		chrI	100619	101579	2.94668	46		chrI	131886	132623	4.04188	56		chrXII	610736	612117	1.69938	2503
chrI	84125	84696	3.41212	63		chrI	99384	99969	4.99062	20		chrI	86801	87613	3.43931	-79		chrI	99369	100026	1.65378	-1		chrI	105487	106193	2.88829	32		chrI	135531	136129	2.02444	-24		chrXII	1074416	1075769	3.1439	503
chrI	86805	87617	4.28271	-75		chrI	100812	101589	3.71652	-56		chrI	92149	93187	3.45212	-232		chrI	100702	101535	3.1284	26		chrI	108331	108764	2.94267	3		chrI	138109	138732	3.1186	-76		chrXIV	6258	6565	2.80214	-149
chrI	92146	93200	4.00503	-227		chrI	105532	106135	4.82614	38		chrI	94346	94915	3.40879	-56		chrI	105628	106206	3.1372	-45		chrI	110172	110651	2.80589	18		chrI	154477	155288	2.65861	-122		chrXV	55229	55749	2.63385	-69
chrI	94274	94942	2.47095	-79		chrI	108313	108767	4.03178	11		chrI	99421	100041	3.44535	-34		chrI	108296	108796	3.1666	5		chrI	113030	115294	2.77331	-88		chrI	158510	159158	3.23287	-132		chrXV	303586	304410	3.87384	2226
chrI	99430	100044	3.92352	-40		chrI	110167	110748	3.26017	-28		chrI	100753	101681	3.41971	-72		chrI	110202	110579	3.09195	39		chrI	118544	120332	2.82089	103		chrI	168571	169503	5	-166		chrXV	1087421	1087976	3.30595	-15
chrI	100712	101695	3.79602	-59		chrI	113019	115195	2.72596	-143		chrI	105606	106186	3.41406	-24		chrI	113114	113897	3.17167	-147		chrI	124623	125147	2.89165	6		chrI	174926	175611	3.64716	-134		chrXVI	809653	810204	3.01291	-144
chrI	105589	106173	4.67332	-9		chrI	113019	115195	2.72596	-143		chrI	108302	108789	3.52603	5		chrI	114288	115233	1.62681	-146		chrI	128780	129532	2.94432	-114		chrI	183505	183980	2.53042	-27		chrXVI	943880	945038	2.76489	340
chrI	108279	108795	3.00417	14		chrI	124627	125083	4.14768	-24		chrI	110211	110604	3.3175	22		chrI	119672	120174	3.16179	-302		chrI	131878	132884	2.88973	182		chrI	184608	185134	2.49492	-21
chrI	110207	110555	2.2032	49		chrI	128747	129561	3.82883	-116		chrI	113111	113888	3.51632	-141		chrI	124628	125114	3.16883	-8		chrI	135416	136198	2.79412	-47		chrII	3448	4086	3.07434	-868
chrI	113122	113874	3.28503	-139		chrI	131928	132638	4.41519	84		chrI	114295	115212	3.40395	-139		chrI	128810	129493	3.11611	-118		chrI	136501	137344	2.87674	9		chrII	17614	18261	4.48686	-242
chrI	114317	115199	4.42241	-143		chrI	138168	139011	3.03123	-245		chrI	118414	120136	3.50586	266		chrI	131973	132596	3.12124	86		chrI	138084	139020	2.94371	-207		chrII	23520	24248	3.34947	-214
chrI	118419	120145	3.15401	259		chrI	150893	151308	2.82231	65		chrI	124578	125070	3.51683	-55		chrI	135489	136127	3.18193	-46		chrI	150916	151321	2.90728	47		chrII	48398	49851	3.77016	300
chrI	124575	125071	3.25997	-56		chrI	151814	152522	3.69927	-89		chrI	128782	129513	3.50992	-122		chrI	138098	138777	3.05129	-93		chrI	151802	152566	2.89943	-73		chrII	63517	64020	3.14811	-107
chrI	128801	129517	3.10988	-111		chrI	154423	155321	3.85399	-133		chrI	131879	132534	3.50027	8		chrI	151982	152489	3.02258	-21		chrI	154352	155388	2.93757	-135		chrII	69137	69860	3.62884	-54
chrI	131892	132568	3.74431	31		chrI	158366	159172	4.00761	-150		chrI	138080	139071	3.24339	-231		chrI	154477	155284	3.20031	-124		chrI	158423	159262	2.79587	-123		chrII	70823	71781	5	-175
chrI	135463	136150	2.32981	-47		chrI	168643	169557	5	-229		chrI	143521	143896	3.01805	2		chrI	158499	159178	3.04523	-127		chrI	168528	169557	2.74536	-172		chrII	91887	92647	3.61862	-147
chrI	136502	137363	1.35863	19		chrI	174817	175679	4.68587	-113		chrI	150933	151312	3.08713	43		chrI	168579	169482	2.14526	-160		chrI	174866	175688	2.80446	-142		chrII	101739	102148	2.34719	58
chrI	138104	139069	3.31439	-242		chrI	179723	182402	3.56132	-1243		chrI	151782	152509	3.44767	-111		chrI	174924	175616	3.01831	-135		chrI	180655	182381	2.91321	-1698		chrII	113019	113992	3.9772	-79
chrI	143542	143895	1.89901	12		chrI	182764	184011	2.51157	-382		chrI	154426	155289	3.52745	-134		chrI	183391	183970	3.15924	-89		chrI	184508	185214	2.92878	-31		chrII	124500	125334	4.72792	-158
chrI	150966	151328	2.44388	19		chrI	184503	185227	3.67662	-27		chrI	158408	159216	3.31027	-154		chrI	184583	185127	3.16137	-37		chrI	186753	189252	2.90956	-104		chrII	131925	132710	3.596	-106
chrI	151816	152501	3.16529	-98		chrI	186748	189204	4.44662	-131		chrI	168629	169518	3.20606	-203		chrI	186805	189191	3.10907	-109		chrI	192485	192888	2.8902	68		chrII	142559	143408	3.2984	-116
chrI	154443	155289	3.60727	-139		chrI	192497	192874	2.44013	67		chrI	171449	172093	3.35449	-68		chrI	192500	192867	3.13045	65		chrI	222279	223478	2.93172	473		chrII	145511	146463	2.79587	-200
chrI	158460	159195	4.31212	-138		chrI	222292	223474	4.27259	477		chrI	174926	175629	3.48323	-143		chrI	222532	223462	3.18271	591		chrI	223823	226222	2.90202	-161		chrII	150950	151698	3.09716	-104
chrI	168632	169513	4.57399	-202		chrI	223833	225959	3.28631	-34		chrI	184509	185139	3.32025	-68		chrI	224295	225652	3.19795	-112		chrII	3437	4156	2.84392	-898		chrII	158079	158651	2.51128	24
chrI	171430	172038	2.41133	-31		chrII	3366	4457	4.37715	-1013		chrI	186731	189456	3.38368	-13		chrII	3447	4152	3.03301	-901		chrII	4956	5511	2.84383	-225		chrII	159922	160471	4.30972	13
chrI	174925	175613	3.98994	-134		chrII	17651	18351	4.21822	-305		chrI	191064	192820	3.15608	475		chrII	17638	18323	3.125	-285		chrII	17629	18334	2.91653	-286		chrII	172313	172865	3.92326	55
chrI	184490	185163	3.4738	-65		chrII	20887	21668	3.4364	15		chrI	213862	214455	3.3035	3333		chrII	21053	21597	3.03971	-32		chrII	20878	21655	2.87035	26		chrII	186142	186788	4.55399	9
chrI	185965	189509	3.96033	-370		chrII	23527	24355	3.92016	-157		chrI	222492	225676	3.37503	220		chrII	23505	24234	3.08983	-228		chrII	23467	24260	2.83605	-234		chrII	201436	202735	4.09953	30
chrI	190665	192837	2.01553	666		chrII	35713	36362	3.93241	-1015		chrII	3476	4496	3.25119	1023		chrII	35926	36367	3.21174	-906		chrII	35873	36374	2.87276	-929		chrII	206724	207405	1.84144	-116
chrI	222473	225649	4.11865	243		chrII	40672	41150	3.77795	80		chrII	4923	5518	3.44584	-212		chrII	40671	41013	3.08068	11		chrII	42840	43149	2.8661	-282		chrII	227159	227841	3.53509	-136
chrII	3418	4500	4.28805	1050		chrII	44755	45107	2.90669	-13		chrII	8113	8696	3.35745	228		chrII	44741	45148	3.17983	-27		chrII	44737	45123	2.87738	-12		chrII	242231	243050	4.5213	-73
chrII	4920	5502	3.44375	-202		chrII	46540	47338	1.89572	241		chrII	17647	18357	3.47139	-306		chrII	48356	49863	3.12303	285		chrII	48316	49955	2.94978	311		chrII	254798	255144	2.73089	713
chrII	8100	8720	2.7178	233		chrII	48334	49946	3.93507	315		chrII	21048	21723	3.44806	-93		chrII	63541	64005	3.13098	-103		chrII	63552	64103	2.951	-48		chrII	273419	273964	3.77229	11
chrII	10363	11042	1.95634	-152		chrII	59109	59725	2.11313	-35		chrII	23537	24253	3.48594	-203		chrII	69152	69910	3.13308	-86		chrII	69142	69985	2.92565	-119		chrII	288950	289719	3.59197	-110
chrII	17661	18367	3.39075	-318		chrII	63539	64098	4.19754	-57		chrII	35883	36379	3.51071	-922		chrII	70840	71815	2.99056	-201		chrII	70647	72045	2.61218	-219		chrII	299653	300737	2.70776	29
chrII	21066	21718	3.49476	-99		chrII	69157	69920	4.5185	-94		chrII	39689	41093	3.49466	-440		chrII	74338	75579	3.09708	-264		chrII	74274	75649	2.95475	-267		chrII	355686	356772	4.70832	-212
chrII	23531	24270	3.06409	-197		chrII	70811	71810	4.26504	-184		chrII	42827	43414	3.24669	-156		chrII	84006	84789	3.11452	-137		chrII	87540	88271	2.92956	-117		chrII	362597	363096	3.74495	-333
chrII	29086	29745	1.97015	-519		chrII	74175	75515	3.52322	-150		chrII	44776	45137	3.26623	-39		chrII	89937	90945	3.19563	90		chrII	89912	90990	2.93108	80		chrII	397989	398507	4.5182	29
chrII	35894	36369	3.24611	-921		chrII	87523	88077	2.75022	-11		chrII	48340	49858	3.52389	274		chrII	91895	92660	3.18265	-136		chrII	91869	92733	2.81234	-113		chrII	400647	401356	1.59929	-112
chrII	42830	43397	1.98719	-163		chrII	89920	90903	1.4203	119		chrII	63479	63988	3.48378	-142		chrII	101706	102206	3.21046	70		chrII	101667	102369	2.89562	132		chrII	427084	428032	5	-74
chrII	44768	45117	2.27782	-25		chrII	91895	92653	3.8616	-140		chrII	69200	69953	3.46877	-132		chrII	107324	108176	3.19993	-182		chrII	107300	108280	2.88157	-142		chrII	435418	436117	2.82134	-70
chrII	46950	47441	1.76025	-16		chrII	101728	102337	4.33169	147		chrII	70864	71817	3.16779	-214		chrII	113127	113978	3.02136	-126		chrII	110249	111764	2.21877	413		chrII	436560	437229	2.87408	-56
chrII	48332	49871	3.50298	277		chrII	107261	108280	3.21565	-161		chrII	74368	75562	3.53104	-270		chrII	116537	117708	2.7144	-294		chrII	110249	111764	2.21877	413		chrII	458141	458978	2.10699	-48
chrII	59210	60026	1.8848	-236		chrII	110203	111758	3.90298	387		chrII	84036	84778	3.40059	-146		chrII	124514	125289	3.07371	-143		chrII	112980	114027	2.80602	-77		chrII	492611	493342	2.5522	-155
chrII	63457	64033	3.12855	-131		chrII	113041	113967	3.66134	-77		chrII	87582	88152	3.32795	-78		chrII	131939	132735	3.13469	-87		chrII	121067	122268	2.89046	206		chrII	493865	494270	2.16296	47
chrII	69226	70008	3.57638	-172		chrII	121334	122231	2.4688	91		chrII	89868	90988	3.50395	103		chrII	142545	143378	3.15113	-94		chrII	124495	125343	2.93575	-160		chrII	495021	495765	4.22004	-54
chrII	70875	71826	5	-224		chrII	124558	125363	4.1639	-164		chrII	91862	92669	3.40047	-148		chrII	145473	146359	3.16335	-188		chrII	131960	132851	2.74121	-18		chrII	496662	497410	3.24316	-127
chrII	74374	75547	3.45376	-266		chrII	131953	132804	3.85315	-45		chrII	101514	102189	3.50402	-34		chrII	146901	147360	3.20249	-78		chrII	141091	141485	2.68236	41		chrII	504075	505115	3.67534	-259
chrII	84051	84792	2.49771	-161		chrII	142558	143498	4.15713	-160		chrII	107268	108184	3.46752	-206		chrII	150944	151754	3.10073	-129		chrII	142471	143572	2.79769	-154		chrII	505449	505946	3.70996	30
chrII	87571	88625	2.65539	-309		chrII	145498	146437	3.32796	-219		chrII	110270	111713	3.24896	398		chrII	158052	158651	3.18037	37		chrII	145440	146423	2.94088	-204		chrII	526655	527412	3.61457	-133
chrII	89885	90979	2.4555	99		chrII	146858	147395	2.40712	-82		chrII	113117	113953	3.52579	-108		chrII	159916	160469	2.9895	9		chrII	146825	147428	2.90327	-82		chrII	527809	528460	2.88458	-97
chrII	91900	92655	3.40723	-136		chrII	150950	151758	3.72238	-134		chrII	116560	117923	3.52971	-347		chrII	161503	161919	3.19421	12		chrII	150896	151744	2.71868	-100		chrII	531937	532875	2.36512	-224
chrII	95938	96411	1.89258	-293		chrII	158068	158624	3.81624	43		chrII	121552	122372	3.26966	-88		chrII	170256	171684	2.12993	347		chrII	157983	158615	2.94789	90		chrII	534803	535516	2.64989	-100
chrII	99911	100250	1.93604	34		chrII	159974	160435	4.06991	21		chrII	124565	125311	3.31488	-179		chrII	172279	172867	3.08094	39		chrII	159939	160550	2.82168	61		chrII	552977	553409	3.55518	7
chrII	101480	102183	2.68791	-54		chrII	161508	162018	4.26719	64		chrII	131985	132730	3.49118	-66		chrII	186119	186829	2.96819	0		chrII	161299	162027	2.9471	-36		chrII	558337	558987	4.14538	-23
chrII	107250	108178	2.83559	-218		chrII	170246	170826	3.14802	-87		chrII	137719	138275	3.44555	1309		chrII	201456	202291	2.96545	-126		chrII	169764	171764	2.93586	141		chrII	565051	565985	2.23863	-205
chrII	110260	111707	2.47327	390		chrII	171103	171779	3.11598	-40		chrII	142570	143431	3.41916	-133		chrII	206688	207431	3.17907	-111		chrII	172260	172970	2.92002	81		chrII	568258	569017	2.61434	-212
chrII	113156	113951	3.39366	-127		chrII	172329	172800	4.08749	31		chrII	145404	146379	3.39283	-164		chrII	209000	209922	3.20732	52		chrII	177284	177725	2.78541	21		chrII	578080	578675	4.28339	14
chrII	116570	117833	3.01223	-373		chrII	177332	177705	2.02189	7		chrII	146843	147344	3.21941	-115		chrII	216101	216613	3.14053	9		chrII	181202	181528	2.82629	-90		chrII	581105	581604	3.0474	17
chrII	121370	122315	2.37945	31		chrII	184188	184926	2.04313	204		chrII	150929	151738	3.43731	-114		chrII	227100	227864	3.0833	-154		chrII	184190	184862	2.80166	173		chrII	582015	582757	3.70795	-22
chrII	124566	125291	3.26437	-170		chrII	186096	186811	4.47682	20		chrII	158061	158773	3.52525	-28		chrII	238408	238680	3.07829	-1077		chrII	186083	186780	2.88206	42		chrII	599596	600243	4.53402	39
chrII	132002	132727	3.52656	-59		chrII	196174	197411	1.44774	2671		chrII	159939	160450	3.47445	11		chrII	242228	243044	3.08626	-68		chrII	197030	197465	2.78654	3126		chrII	603832	604384	4.00621	-1
chrII	137712	138256	2.37707	1296		chrII	197851	198844	1.79358	3400		chrII	161330	161990	3.48482	-39		chrII	269230	269706	3.19202	35		chrII	201396	202913	2.82201	99		chrII	618217	619131	4.98443	-151
chrII	142577	143459	3.72175	-150		chrII	201460	202914	4.41105	131		chrII	169738	171762	3.44815	127		chrII	273413	273979	3.10658	7		chrII	206530	207707	2.91094	-75		chrII	633165	633897	3.05986	-91
chrII	145377	146365	2.56578	-143		chrII	206565	207549	4.60036	-108		chrII	172146	172852	3.48546	-35		chrII	275257	275783	3.14294	7		chrII	208993	210539	2.94247	113		chrII	646917	647595	2.27644	-124
chrII	146842	147338	1.65927	-119		chrII	209115	210176	3.80685	-7		chrII	177310	177725	3.31467	8		chrII	276440	277106	3.0508	-1246		chrII	216137	216553	2.92662	21		chrII	653137	653783	4.49639	104
chrII	150946	151753	3.21607	-130		chrII	227163	227819	3.99836	-145		chrII	181880	182509	3.29348	-101		chrII	283331	284004	3.10203	-70		chrII	227125	227863	2.94041	-142		chrII	657404	658056	2.72462	-102
chrII	153214	154115	2.01341	-55		chrII	238387	238773	4.03824	-1113		chrII	184085	184813	3.25798	96		chrII	287628	289730	1.56059	-754		chrII	238365	238747	2.94181	-1089		chrII	678907	679635	3.07024	-50
chrII	158085	158740	3.64536	-24		chrII	242282	243093	4.22121	-120		chrII	186108	186843	3.37699	-2		chrII	295726	296178	3.19533	50		chrII	242243	243085	2.91207	-96		chrII	684762	685275	2.40124	42
chrII	159956	160436	3.96195	12		chrII	273451	274117	4.11652	-81		chrII	197772	198977	3.27819	3373		chrII	299588	300517	3.17251	-113		chrII	257865	258537	2.95229	-226		chrII	686291	687088	4.27499	-98
chrII	161366	161991	3.95237	-20		chrII	275187	275984	3.45547	-59		chrII	201474	202887	3.18505	125		chrII	306744	307319	3.0972	-77		chrII	267068	267610	2.84314	-3		chrII	691407	692238	4.08819	-130
chrII	169747	171739	2.05141	120		chrII	276275	277090	4.21523	-1156		chrII	206621	207512	3.41179	-118		chrII	318130	318450	3.2002	24		chrII	269061	269763	2.95521	91		chrII	721045	721674	4.03926	-30
chrII	172077	172844	3.78529	-73		chrII	283240	284239	2.81839	2		chrII	208903	209956	3.28376	21		chrII	336765	337685	3.19622	-407		chrII	273345	274083	2.88066	-11		chrII	722546	723488	2.84251	-253
chrII	177314	177709	2.2051	14		chrII	287599	289813	4.41243	-739		chrII	216142	216602	3.42347	-6		chrII	353110	353508	3.20075	-16		chrII	275154	275880	2.94401	10		chrII	723912	724738	4.23362	-62
chrII	181897	182496	1.70072	-103		chrII	292258	292702	2.73602	-615		chrII	227057	227854	3.46004	-180		chrII	355673	356804	3.00394	-222		chrII	276359	277118	2.91782	-1212		chrII	728591	729155	4.36748	-12
chrII	184138	184810	2.37307	121		chrII	295708	296146	2.83396	75		chrII	238342	238762	3.52861	-1085		chrII	360061	360757	3.15121	-222		chrII	283211	284080	2.86744	-92		chrII	734448	735650	2.69511	-410
chrII	186140	186831	3.74686	-12		chrII	306246	308082	3.51103	-209		chrII	242269	243069	3.48999	-101		chrII	362473	363138	3.12397	-292		chrII	287599	289854	2.86992	-718		chrII	738022	738940	3.27148	-101
chrII	196013	197474	2.99385	2622		chrII	310038	311607	4.38091	-510		chrII	251434	252223	3.14611	-813		chrII	364792	366007	3.11342	319		chrII	292228	292736	2.93621	-617		chrII	740956	741566	3.21652	-38
chrII	197779	198913	3.34092	3402		chrII	318152	318423	1.86934	22		chrII	257834	258553	3.45345	-219		chrII	369414	370207	3.07007	-133		chrII	295439	296204	2.83203	180		chrII	742413	743094	3.79541	-178
chrII	201491	202953	3.67542	166		chrII	320828	321743	2.98903	323		chrII	269260	270535	3.35165	-349		chrII	398006	398492	3.02278	28		chrII	299769	300612	2.78311	25		chrII	744086	745118	2.60991	-204
chrII	206636	207566	4.39801	-93		chrII	327080	328131	1.5389	-1547		chrII	273420	274210	3.51995	-112		chrII	400607	401427	3.18317	-127		chrII	301480	302748	2.87174	170		chrII	749077	749789	3.93882	-62
chrII	208885	209962	3.08678	15		chrII	349637	350725	1.74732	-1074		chrII	275200	277082	3.4849	-614		chrII	405093	405534	3.07284	-63		chrII	306732	307134	2.8732	22		chrII	760554	761578	3.45822	-191
chrII	227096	227837	3.63127	-169		chrII	350980	351840	2.36404	41		chrII	283234	284025	3.33428	-108		chrII	410851	411272	3.0385	8		chrII	310061	311614	2.93581	-525		chrII	767999	768630	5	75
chrII	238374	238737	3.20192	-1089		chrII	353098	353469	3.07091	9		chrII	287693	289686	3.19513	-755		chrII	427086	428028	2.89642	-73		chrII	314583	315649	2.88339	-459		chrII	779212	779927	4.57847	-97
chrII	242289	243056	3.43379	-105		chrII	355579	356770	4.57451	-158		chrII	292143	292738	3.48131	-576		chrII	435410	436155	3.13795	-85		chrII	318150	318425	2.78893	22		chrII	782425	782894	3.81937	69
chrII	245426	246072	2.18696	-82		chrII	360059	360896	3.09181	-291		chrII	295685	296184	3.50084	67		chrII	436569	437212	3.09842	-60		chrII	320913	321775	2.9044	265		chrII	786453	787343	4.0341	-108
chrII	250727	251201	2.29165	52		chrII	362185	363100	4.04103	-129		chrII	299770	300469	3.50707	-46		chrII	441177	441834	3.19727	-9		chrII	336502	337764	2.93246	-315		chrII	806799	807693	3.68154	-1811
chrII	251449	252193	1.84554	-805		chrII	365230	366837	3.53676	-315		chrII	301471	302148	3.32832	-134		chrII	447111	447897	3.21246	-181		chrII	338057	338658	2.8111	-159		chrIII	17121	17554	2.71198	48
chrII	267100	267591	1.58105	-10		chrII	369416	371014	3.19221	484		chrII	310072	312334	3.37685	249		chrII	458163	459031	3.02803	-11		chrII	346924	347436	2.87974	121		chrIII	31121	31801	4.86138	12
chrII	269221	270595	3.07614	-339		chrII	398020	398474	4.22021	30		chrII	314672	315654	3.48538	-412		chrII	488296	488801	3.18232	-169		chrII	353079	353511	2.75162	-2		chrIII	35137	35791	4.1112	-71
chrII	273446	274206	3.86636	-123		chrII	400571	401473	3.93418	-132		chrII	321134	321860	3.44863	112		chrII	492641	493373	3.12593	-185		chrII	355384	356803	2.81552	-77		chrIII	46595	47275	3.53307	-30
chrII	275225	277082	3.96846	-627		chrII	405139	405561	2.92858	-99		chrII	336643	337752	3.50352	-380		chrII	493863	494295	3.21191	36		chrII	360057	360797	2.86125	-240		chrIII	52447	53005	3.40651	81
chrII	283217	284034	2.5534	-112		chrII	410710	411322	3.14607	-38		chrII	337993	338758	3.53501	-177		chrII	495032	495720	2.95396	-37		chrII	362185	363167	2.93215	-162		chrIII	60941	61882	2.90555	-239
chrII	287698	289695	4.91987	-748		chrII	423205	424082	2.59815	-121		chrII	346981	347435	3.23262	93		chrII	496685	497394	3.20628	-123		chrII	364780	366057	2.9353	300		chrIII	62936	63665	2.90138	-19
chrII	292154	292733	1.80817	-579		chrII	427101	428044	4.81523	-89		chrII	353140	353515	3.29824	-35		chrII	503981	505113	3.16497	-260		chrII	369351	370280	2.9539	-138		chrIII	65266	65764	4.17028	53
chrII	293842	294493	1.59665	-149		chrII	430629	432285	1.95367	-506		chrII	355730	356808	3.48187	-252		chrII	505427	506013	3.0614	52		chrII	397985	398533	2.92701	18		chrIII	69704	70461	4.24731	-67
chrII	295680	296187	3.13485	68		chrII	435445	436151	3.68229	-100		chrII	362360	363150	3.50013	-241		chrII	526650	527453	3.09853	-115		chrII	400541	401451	2.85793	-106		chrIII	78944	79398	2.66726	9
chrII	299630	300500	2.2321	-101		chrII	436519	437176	3.5135	-103		chrII	369406	370686	3.45004	-368		chrII	527782	528521	3.01198	-114		chrII	404951	405565	2.84908	-7		chrIII	95470	96538	4.15935	-241
chrII	301462	302403	2.02512	-11		chrII	441131	442325	3.80252	213		chrII	389870	391110	3.53377	263		chrII	534719	535496	3.15838	-152		chrII	410888	411317	2.88809	49		chrIII	107568	108291	2.58085	-91
chrII	306725	308728	1.99054	-772		chrII	447103	447961	3.36891	-177		chrII	398033	398476	3.46209	22		chrII	548839	550122	3.19829	-290		chrII	423273	424033	2.94857	-112		chrIII	118106	118807	3.16277	-109
chrII	310081	312498	2.26052	162		chrII	458135	459142	3.41149	31		chrII	400613	401471	3.50501	-152		chrII	552950	553458	3.13737	-4		chrII	425533	426011	2.91315	-6		chrIII	143339	143943	3.84959	7
chrII	314580	315691	3.01884	-439		chrII	461572	462431	1.9101	-129		chrII	405132	405697	3.479	-164		chrII	558262	558972	3.08028	-68		chrII	427075	428110	2.82213	-109		chrIII	146996	148209	4.23636	31
chrII	317706	318436	2.26569	-195		chrII	486413	486872	2.92017	48		chrII	410668	411334	3.52555	-53		chrII	565084	566009	3.20879	-176		chrII	430570	432308	2.89125	-488		chrIII	154840	155522	3.27933	-85
chrII	321007	321819	2.6489	196		chrII	488213	488876	3.48669	-165		chrII	415774	418160	3.46708	984		chrII	568249	569062	3.19427	-196		chrII	435406	436168	2.95156	-89		chrIII	160180	160662	2.56178	-48
chrII	336482	338757	2.5629	-368		chrII	492635	493387	3.99179	-189		chrII	423208	424033	3.4845	-144		chrII	578097	578692	3.10543	31		chrII	436585	437316	2.91405	0		chrIII	166069	166601	4.18137	4
chrII	336482	338757	2.5629	-368		chrII	493787	494415	3.56768	14		chrII	425519	426035	2.81929	-11		chrII	581106	581601	3.20551	18		chrII	441049	442209	2.76837	114		chrIII	172172	172959	3.27739	-142
chrII	346957	347411	2.00589	117		chrII	494966	495772	4.83476	-30		chrII	427081	428053	3.39739	-83		chrII	582078	582718	3.17055	-10		chrII	447037	447981	2.94494	-186		chrIII	185766	186532	3.11434	-340
chrII	349581	350748	1.86251	-1090		chrII	496661	497404	3.74606	-130		chrII	428875	429699	3.21313	-186		chrII	588920	589357	3.19575	-25		chrII	458149	459120	2.89614	27		chrIII	192753	193467	3.32267	-92
chrII	351023	351779	1.31631	50		chrII	503783	505131	4.25866	-170		chrII	430635	432251	3.35046	-492		chrII	591111	591480	3.16546	1478		chrII	461757	462435	2.94416	-43		chrIII	206361	207127	3.10352	-100
chrII	353143	353507	2.40978	-32		chrII	505433	506089	4.67939	93		chrII	435463	436146	3.36212	-107		chrII	598216	598817	3.06094	1154		chrII	483174	485037	2.80085	397		chrIII	207625	208464	4.56451	-95
chrII	355733	356794	3.42695	-247		chrII	526635	527448	3.7721	-125		chrII	436538	437185	3.51377	-89		chrII	599577	600701	3.03816	-180		chrII	486436	486881	2.89961	32		chrIII	209815	210882	3.81735	74
chrII	360103	360895	2.1601	-312		chrII	527768	528623	2.99769	-121		chrII	441101	441895	3.46315	-17		chrII	603834	604394	3.04038	-7		chrII	488229	488792	2.86984	-131		chrIII	211288	212517	3.44273	-26
chrII	362359	363138	3.87337	-235		chrII	531984	534074	2.06415	520		chrII	447121	447876	3.49166	-176		chrII	607300	607738	3.1846	-133		chrII	492599	493406	2.92014	-181		chrIII	213693	215317	5	434
chrII	364357	366133	2.87618	474		chrII	534667	535507	3.70336	-173		chrII	458178	459071	3.46868	17		chrII	609423	610123	3.17643	-20		chrII	493800	494443	2.8434	-7		chrIII	216176	216964	3.6001	-127
chrII	369432	371041	2.76331	462		chrII	536061	536729	2.01831	-180		chrII	460339	461044	3.43026	1181		chrII	618226	619120	3.02015	-150		chrII	494927	495817	2.83068	-33		chrIII	222913	224633	3.517	457
chrII	379725	380104	1.68903	19		chrII	544219	544578	2.39352	94		chrII	473896	474643	3.29128	-344		chrII	620663	621114	3.21197	17		chrII	496660	497521	2.90926	-72		chrIII	236149	236576	2.50423	-41
chrII	385912	386602	2.3444	-29		chrII	548856	550172	2.68271	-257		chrII	476252	476766	2.78704	-72		chrII	633138	633923	3.15474	-91		chrII	503875	505099	2.88052	-200		chrIII	238524	239161	1.3742	-212
chrII	389842	391097	3.45675	243		chrII	552963	553477	3.95121	-20		chrII	486453	486876	3.3183	26		chrII	646926	647609	3.20086	-136		chrII	505424	505988	2.76979	38		chrIII	240212	241032	5	-79
chrII	398025	398452	3.58518	38		chrII	558219	558984	4.22518	-83		chrII	488267	488737	3.40902	-122		chrII	653135	653805	3.02238	114		chrII	526587	528668	2.5332	410		chrIII	241896	242907	5	-50
chrII	400623	401458	3.17175	-151		chrII	565141	566133	3.72154	-86		chrII	492638	493367	3.51128	-181		chrII	657385	658076	3.2037	-101		chrII	526587	528668	2.5332	410		chrIII	246251	247354	3.72011	-160
chrII	405119	405708	2.95992	-163		chrII	568225	569048	2.98143	-211		chrII	493851	494452	3.49661	-37		chrII	664395	665021	3.16869	-31		chrII	531856	533904	2.95339	669		chrIII	248522	249221	3.5411	-57
chrII	408316	409668	2.43384	-177		chrII	571004	572700	3.05714	38		chrII	495039	495758	3.43881	-60		chrII	670080	670659	3.04606	-73		chrII	534812	535540	2.94997	-84		chrIII	252190	253193	5	-64
chrII	410609	411359	3.61295	-70		chrII	577794	578720	4.1956	-107		chrII	496683	497385	3.47812	-129		chrII	678895	679743	2.98923	-98		chrII	536085	536716	2.81516	-174		chrIII	254036	254724	4.09386	9
chrII	423187	424038	3.22711	-152		chrII	581179	581575	3.65484	-5		chrII	504059	505974	1.7181	163		chrII	684662	685297	3.1586	3		chrII	539332	540049	2.91944	-296		chrIII	258357	259064	2.21858	-60
chrII	425505	426021	2.83258	3		chrII	581967	582883	4.44809	17		chrII	504059	505974	1.7181	163		chrII	686327	687103	3.12039	-123		chrII	548766	550271	2.92576	-252		chrIII	264130	265335	3.92108	-266
chrII	427085	428051	4.15482	-84		chrII	588902	589525	3.71487	-100		chrII	512447	513075	3.26653	-283		chrII	691419	692236	3.09754	-135		chrII	552885	553509	2.89634	3		chrIII	266961	267441	2.4671	-233
chrII	428892	429748	2.25356	-219		chrII	597765	598843	3.03774	941		chrII	526647	527446	3.49783	-120		chrII	699664	700244	3.18557	-11		chrII	558201	559016	2.82493	-76		chrIII	279617	280341	3.05154	-138
chrII	430627	432265	2.51161	-495		chrII	599539	601126	4.13529	-220		chrII	527745	528555	3.41828	-112		chrII	706544	706970	3.12983	36		chrII	559887	560284	2.90405	8		chrIII	286567	287030	3.65116	37
chrII	435457	436134	2.69983	-98		chrII	601856	602768	1.56963	-322		chrII	531924	533968	3.31869	603		chrII	711091	711847	3.20843	70		chrII	565108	566026	2.9279	-156		chrIII	288989	289750	4.13701	-112
chrII	436546	437195	3.06109	-80		chrII	603785	604313	4.4056	58		chrII	534781	535485	3.47513	-127		chrII	714130	714933	3.18703	-77		chrII	568077	569078	2.80985	-152		chrIV	11409	12207	3.95009	1552
chrII	441093	442035	3.0656	49		chrII	609361	610176	3.58954	-16		chrII	548811	550087	3.48235	-322		chrII	716329	717074	3.11914	-237		chrII	570979	572717	2.93231	42		chrIV	21562	22924	3.23082	365
chrII	447129	447889	3.05588	-186		chrII	618277	619102	4.39631	-167		chrII	552927	553515	3.49482	-21		chrII	717722	718557	3.14133	-146		chrII	577794	578813	2.91058	-60		chrIV	31910	32555	3.64917	-63
chrII	454359	455010	1.38789	-137		chrII	620622	621109	2.14913	-6		chrII	558186	558958	3.50252	-113		chrII	720832	721668	3.06063	-140		chrII	581094	581597	2.94983	26		chrIV	38273	38738	3.56958	19
chrII	458203	459090	3.10058	39		chrII	633122	633932	3.78964	-95		chrII	565128	566039	3.53056	-139		chrII	722267	723487	3.2007	266		chrII	581980	582828	2.74651	-4		chrIV	41964	42991	4.30376	-222
chrII	460336	461052	2.41523	1179		chrII	634639	635375	2.66615	-139		chrII	568236	569030	3.51286	-207		chrII	723992	724691	3.15526	-79		chrII	583164	583931	2.87508	-172		chrIV	51798	52728	5	-90
chrII	461723	462419	2.25878	-68		chrII	646840	647651	3.99929	-114		chrII	570990	572590	3.43532	100		chrII	728603	729166	3.02096	0		chrII	588855	589508	2.91776	-68		chrIV	65800	66418	2.96339	-384
chrII	473882	474602	2.05037	-316		chrII	653119	653912	4.84687	160		chrII	577898	578685	3.42789	-72		chrII	729896	730722	3.21444	-78		chrII	590932	591494	2.94642	1472		chrIV	68358	69178	4.20634	-162
chrII	483200	483956	2.22661	-211		chrII	657302	658120	3.40733	-111		chrII	581108	581601	3.51413	17		chrII	737987	738917	3.03569	-83		chrII	597792	598878	2.95584	972		chrIV	70019	70465	3.57165	77
chrII	484233	485030	3.49884	-129		chrII	664406	665054	3.15875	-53		chrII	581995	582717	3.48036	-52		chrII	739412	740114	3.20174	-78		chrII	599385	601022	2.86999	-245		chrIV	74051	74665	3.75542	-440
chrII	486463	486856	2.395	31		chrII	670008	670730	2.57459	-72		chrII	588900	589643	3.3842	-158		chrII	740896	741568	3.14045	-67		chrII	603752	604341	2.85632	60		chrIV	77663	78741	4.32194	-224
chrII	488279	488882	2.01235	-201		chrII	674607	675667	2.79054	-3		chrII	591043	591733	3.45599	1386		chrII	742398	743118	3.12481	-182		chrII	607235	607810	2.92883	-129		chrIV	93634	94262	2.71828	-203
chrII	492615	493365	3.307	-168		chrII	678862	679874	4.55204	-147		chrII	597197	598846	3.40705	659		chrII	743993	745155	3.09383	-176		chrII	609205	610147	2.9527	77		chrIV	106663	107451	4.79744	-151
chrII	493851	494447	3.04705	-34		chrII	682828	683814	3.1529	-107		chrII	599620	601168	3.49474	-159		chrII	749086	749852	3.12584	-98		chrII	618224	619069	2.76919	-124		chrIV	111215	111715	2.98431	-115
chrII	495049	495760	3.7732	-66		chrII	684594	685331	4.32202	-14		chrII	603784	604551	3.45307	-61		chrII	756827	757457	3.17664	-36		chrII	620635	621143	2.69567	17		chrIV	121470	122315	3.76806	-301
chrII	496697	497395	2.98258	-117		chrII	686282	687163	4.361	-131		chrII	606956	607747	3.40216	203		chrII	779193	779941	2.99546	-100		chrII	623007	623742	2.78328	-201		chrIV	124879	125319	3.31329	-101
chrII	504083	505951	3.40918	163		chrII	691419	692274	3.77462	-122		chrII	609450	610233	3.48936	-89		chrII	782426	782860	3.12667	52		chrII	633135	633947	2.90511	-81		chrIV	126019	126969	5	-293
chrII	504083	505951	3.40918	163		chrII	699565	700206	3.6532	57		chrII	611659	612007	3.27792	49		chrII	792654	793085	3.18797	21		chrII	634649	635353	2.86564	-145		chrIV	137875	138384	3.52504	-161
chrII	512427	513308	2.12051	-176		chrII	700822	701871	2.53839	495		chrII	618303	619062	3.508	-160		chrII	800161	801527	3.10256	321		chrII	645269	645857	2.85487	13		chrIV	145203	145860	4.82074	-14
chrII	526644	527421	3.49071	-134		chrII	706486	707880	3.38627	-345		chrII	620540	621113	3.45968	-45		chrII	804692	805438	3.1113	191		chrII	646804	647679	2.81836	-110		chrIV	162875	163533	3.56546	-50
chrII	527785	528555	3.56105	-132		chrII	710986	711883	3.00201	104		chrII	622968	623726	3.36227	-229		chrII	806423	807679	3.1531	1700		chrII	653116	653967	2.8737	186		chrIV	166950	167998	2.49723	-220
chrII	531924	534110	2.53496	532		chrII	714126	714936	2.12562	-76		chrII	633143	633900	3.50878	-100		chrIII	17101	17559	3.19088	40		chrII	657300	658138	2.95371	-113		chrIV	171932	172763	2.92407	-133
chrII	534677	535473	1.52323	-185		chrII	720762	721732	4.10163	-143		chrII	634665	635351	3.3508	-138		chrIII	21850	22520	3.1671	-79		chrII	662758	663300	2.78955	274		chrIV	174406	175075	2.05668	-153
chrII	536089	536725	2.487	-168		chrII	722249	723521	3.98062	274		chrII	646934	647657	3.44506	-164		chrIII	23025	23847	3.06535	-57		chrII	664286	664966	2.92724	51		chrIV	182674	183466	4.47428	-52
chrII	538066	540084	2.04097	-912		chrII	723945	724753	4.06529	-86		chrII	653114	653682	3.37958	42		chrIII	27173	28209	3.19998	-238		chrII	670027	670700	2.77723	-67		chrIV	184520	185272	4.18977	-29
chrII	538066	540084	2.04097	-912		chrII	728556	729164	4.54358	-25		chrII	657366	658104	3.29612	-97		chrIII	31036	31832	1.81295	-15		chrII	674593	675632	2.80666	21		chrIV	190176	191109	2.57381	-57
chrII	544258	544576	1.32	76		chrII	729837	730821	3.73249	-58		chrII	662770	663216	3.37374	310		chrIII	35133	35805	3.15766	-76		chrII	678703	679604	2.90968	67		chrIV	198108	198913	4.69437	-335
chrII	546113	546598	1.78669	-20		chrII	734332	736556	3.76619	86		chrII	664420	665023	3.52359	-45		chrIII	38691	39358	3.01477	-224		chrII	682797	683722	2.91724	-168		chrIV	199577	200380	4.41853	-17
chrII	548812	550078	3.10291	-326		chrII	737910	738902	4.42634	-37		chrII	670057	670693	3.45552	-78		chrIII	46604	47270	3.18499	-32		chrII	684601	685364	2.88394	6		chrIV	221032	221412	2.56418	-451
chrII	552924	553531	4.02073	-28		chrII	739316	740168	1.49418	-99		chrII	674761	675619	3.35332	-56		chrIII	48197	48527	3.06595	2		chrII	686234	687220	2.94509	-135		chrIV	245260	246154	4.23914	-125
chrII	558173	558933	4.10217	-132		chrII	740910	742008	3.66857	160		chrII	678940	679621	3.4963	-60		chrIII	52442	52929	3.17609	41		chrII	691409	692306	2.91985	-111		chrIV	251230	251926	5	12
chrII	559895	560264	1.77714	2		chrII	742270	743151	3.94312	-135		chrII	682842	683655	3.43572	-159		chrIII	58507	58948	3.12256	-50		chrII	696630	698290	2.89341	-158		chrIV	258434	259210	4.89765	-93
chrII	565123	566036	3.29238	-143		chrII	743918	745142	4.00393	-132		chrII	684581	685308	3.46476	-32		chrIII	60964	61874	3.21405	-239		chrII	699652	700229	2.91909	2		chrIV	263788	264288	1.72184	72
chrII	568218	569025	3.39463	-196		chrII	747451	747945	2.56212	105		chrII	686332	687086	3.51042	-117		chrIII	62970	63648	3.20026	-27		chrII	700913	701842	2.88671	464		chrIV	271560	272653	5	-206
chrII	570988	572662	2.72403	65		chrII	748986	749894	3.98526	-69		chrII	691440	692222	3.40622	-138		chrIII	65274	65781	2.9835	40		chrII	706501	707675	2.9184	-295		chrIV	276362	277016	2.59207	-108
chrII	577907	578729	3.68891	-46		chrII	756549	757544	2.58487	59		chrII	696962	698326	3.17821	-342		chrIII	69717	70463	3.12019	-60		chrII	711037	711928	2.94227	56		chrIV	286462	287386	4.0164	-135
chrII	581120	581579	3.29055	22		chrII	759854	761566	2.47732	-94		chrII	699672	700261	3.49932	-24		chrIII	78947	79391	3.06714	7		chrII	714054	714976	2.77118	-60		chrIV	292180	293068	4.61749	-157
chrII	582010	582697	3.51326	-54		chrII	767269	768586	4.40695	-312		chrII	706501	707819	3.5278	-367		chrIII	95460	96537	2.98626	-236		chrII	716229	717055	2.94196	-177		chrIV	296110	296691	2.13999	-72
chrII	588910	589641	3.14359	-162		chrII	779216	780010	3.91328	-54		chrII	711107	711868	3.47505	51		chrIII	107555	108258	3.17223	-114		chrII	722229	723538	2.87486	273		chrIV	300667	301655	4.26674	-162
chrII	591057	591672	2.70818	1409		chrII	782455	782853	3.9503	63		chrII	714174	714941	3.48857	-103		chrIII	118090	118842	3.15795	-118		chrII	723911	724764	2.80459	-75		chrIV	304598	305404	2.00618	-236
chrII	593136	593482	1.87955	-535		chrII	783996	787368	4.39894	-609		chrII	716274	717109	3.28761	-227		chrIII	123957	124282	3.1201	-1117		chrII	726725	727265	2.94212	79		chrIV	325799	326738	4.96438	-120
chrII	594715	595376	1.65036	-182		chrII	792664	793113	3.02043	40		chrII	717730	721653	3.51742	659		chrIII	143293	143974	2.92135	0		chrII	728562	729214	2.89386	3		chrIV	337100	337750	3.17323	-62
chrII	597180	598862	3.36954	658		chrII	796689	798387	2.90171	984		chrII	722267	723499	3.21736	272		chrIII	147004	148157	3.16236	53		chrII	729798	730833	2.95007	-71		chrIV	376120	376638	2.33142	101
chrII	599617	601174	3.65617	-157		chrII	799138	802188	3.36546	140		chrII	723955	724677	3.4208	-53		chrIII	152549	152972	2.80221	-76		chrII	734361	736539	2.77483	80		chrIV	381159	381856	3.1377	-70
chrII	601948	602768	1.30705	-276		chrII	804635	807777	3.66214	855		chrII	726774	727270	3.3179	52		chrIII	154804	155529	3.18518	-71		chrII	740887	741627	2.93903	-42		chrIV	393227	394543	3.83739	27
chrII	603839	604561	3.75592	-93		chrIII	17121	17611	4.77409	76		chrII	727895	729162	3.28884	-356		chrIII	160183	160662	3.20903	-50		chrII	742400	743072	2.94407	-160		chrIV	398718	399664	1.83407	-149
chrII	605641	605897	1.9264	-197		chrIII	27110	28310	3.46535	-219		chrII	729864	730724	3.45793	-93		chrIII	166086	166636	3.10668	-22		chrII	743331	745177	2.83551	144		chrIV	403073	403555	2.86371	-23
chrII	606941	607745	2.9479	194		chrIII	30986	31768	3.62727	-72		chrII	734400	736522	3.50438	69		chrIII	167884	168295	2.96879	-91		chrII	749005	749880	2.89197	-72		chrIV	404676	405197	3.99629	20
chrII	609433	610217	3.0093	-72		chrIII	35119	35824	4.46611	-79		chrII	738008	738895	3.47343	-83		chrIII	185735	186533	3.11572	-355		chrII	756465	757550	2.9344	98		chrIV	426677	427556	2.70566	-183
chrII	611683	611980	1.42568	50		chrIII	38559	39416	3.46125	-187		chrII	739384	740110	3.43046	-94		chrIII	190433	190891	3.19858	70		chrII	760724	761609	2.83955	-90		chrIV	428381	429314	4.12287	-219
chrII	618284	619061	3.37431	-150		chrIII	42910	43550	2.37998	1065		chrII	740878	741987	3.42166	134		chrIII	192757	193439	3.12434	-80		chrII	767023	768676	2.86803	-244		chrIV	431154	432149	2.62552	-135
chrII	620529	621112	3.05073	-51		chrIII	43806	44543	2.05023	262		chrII	742377	743086	3.45156	-156		chrIII	196916	197451	3.14302	1		chrII	770361	772187	2.91494	35		chrIV	461581	462544	3.9478	221
chrII	622946	623753	2.68161	-226		chrIII	46592	47329	4.11093	-56		chrII	744078	745163	3.45931	-223		chrIII	205208	205900	3.18615	-157		chrII	779194	780057	2.82268	-41		chrIV	478473	479101	4.20081	-29
chrII	633143	633886	3.43973	-107		chrIII	48132	48517	3.01718	39		chrII	749101	749840	3.5314	-100		chrIII	206352	207132	3.11739	-98		chrII	782433	782849	2.92205	50		chrIV	497111	497579	2.99288	-27
chrII	634647	635318	1.94922	-163		chrIII	52540	52946	3.36025	98		chrII	756783	757597	3.46253	-84		chrIII	207640	208513	2.8989	-127		chrII	783912	787396	2.85117	-581		chrIV	524416	525098	4.28624	-44
chrII	644795	645869	1.85729	-218		chrIII	60927	61893	3.0475	-237		chrII	759913	761546	3.4841	-114		chrIII	209844	210933	3.09454	34		chrII	792665	793051	2.87558	9		chrIV	539511	540205	4.25282	55
chrII	646952	647673	3.41903	-181		chrIII	62914	63704	3.56929	-27		chrII	767354	768546	3.38551	-290		chrIII	211281	212249	3.13125	-164		chrII	796730	798045	2.91267	1134		chrIV	546301	546925	2.28113	-29
chrII	653088	653769	4.18088	73		chrIII	65325	65723	4.13243	44		chrII	773298	774535	3.34908	-5		chrIII	213565	215331	2.6991	377		chrII	799927	801481	2.79755	181		chrIV	557795	558274	2.72882	25
chrII	657350	658079	3.19374	-115		chrIII	69640	70452	4.18777	-104		chrII	779233	779942	3.50049	-79		chrIII	216151	216963	2.97731	-140		chrII	804680	806423	2.88908	201		chrIV	565539	566197	2.72039	-59
chrII	664397	665022	2.67317	-33		chrIII	79002	79492	2.94855	49		chrII	782461	782830	3.48179	55		chrIII	222841	224619	3.09171	500		chrII	806694	807814	2.91852	-1803		chrIV	570356	570920	3.84554	-11
chrII	670045	670680	3.04927	-66		chrIII	95223	96508	4.56579	-103		chrII	783994	787362	3.49866	-605		chrIII	228151	228840	3.19886	9		chrIII	17081	17655	2.75266	78		chrIV	609815	610674	4.64771	-164
chrII	674730	675620	2.57151	-41		chrIII	106581	107204	3.06034	-40		chrII	796595	798494	3.30395	977		chrIII	231317	231755	3.21078	36		chrIII	21760	23812	2.03184	593		chrIV	613812	614311	3.06194	-58
chrII	678958	679676	3.96358	-96		chrIII	107618	108288	3.86414	-68		chrII	798810	801594	3.52405	40		chrIII	236150	236561	3.21545	-34		chrIII	24112	25142	2.91683	-141		chrIV	617941	618601	4.40194	35
chrII	682851	683670	2.35159	-167		chrIII	112595	113236	1.3465	-164		chrII	804675	807646	3.52218	810		chrIII	240235	241091	2.95253	-120		chrIII	27105	28328	2.86759	-212		chrIV	628111	628922	5	17
chrII	684525	685305	4.11241	-62		chrIII	113996	114323	1.85055	390		chrII	808376	810207	3.36631	-195		chrIII	241937	242884	1.57762	-59		chrIII	30967	31958	2.7269	14		chrIV	629662	630112	2.3696	11
chrII	686325	687096	3.21438	-119		chrIII	118082	118909	4.07546	-124		chrIII	17095	17598	3.41202	57		chrIII	246273	247320	3.14732	-166		chrIII	35119	35822	2.76858	-78		chrIV	666527	667196	3.20223	-92
chrII	691437	692240	3.47077	-130		chrIII	143175	143977	3.92276	-58		chrIII	21855	22538	3.29006	-91		chrIII	248482	249243	3.14286	-48		chrIII	38628	39441	2.83136	-234		chrIV	675372	676284	2.17555	-161
chrII	699659	700237	2.36748	-5		chrIII	146986	148063	4.24519	109		chrIII	23079	23824	3.46298	-73		chrIII	249756	250118	3.16775	108		chrIII	40561	41252	2.87995	-183		chrIV	681411	682462	4.56811	-238
chrII	706487	707815	3.17499	-358		chrIII	151824	153314	2.5232	-268		chrIII	24135	25046	3.51363	-177		chrIII	252270	253197	1.56618	-106		chrIII	42855	43494	2.90375	1010		chrIV	683248	683833	3.6918	40
chrII	711085	711874	3.12386	59		chrIII	166099	166625	3.70746	-23		chrIII	27122	28189	3.36992	-273		chrIII	254029	254697	3.12947	-8		chrIII	46554	47270	2.82279	-7		chrIV	685360	686086	3.69586	-80
chrII	714137	714959	3.04255	-93		chrIII	167827	168277	2.94388	-53		chrIII	30915	31812	3.23762	-85		chrIII	258342	258953	3.17602	3		chrIII	52517	52897	2.78606	62		chrIV	716341	716927	3.72422	-12
chrII	716321	717173	1.41776	-282		chrIII	171981	173774	4.1184	-454		chrIII	35166	35814	3.51872	-97		chrIII	262322	263740	3.15939	115		chrIII	58473	59142	2.81503	-130		chrIV	739669	740225	4.11411	50
chrII	717711	721656	2.91899	651		chrIII	178701	179739	3.09077	-300		chrIII	38712	39520	3.45241	-315		chrIII	264120	265342	3.08751	-264		chrIII	60955	61868	2.89112	-239		chrIV	743537	744579	4.7379	-184
chrII	717711	721656	2.91899	651		chrIII	185731	186537	4.53189	-355		chrIII	42889	43474	3.30484	1017		chrIII	266943	267475	3.09477	-225		chrIII	62909	63723	2.95096	-34		chrIV	745909	747132	5	-217
chrII	722260	723485	3.5546	262		chrIII	190465	190855	3.88862	68		chrIII	46627	47282	3.30169	-50		chrIII	272594	273194	3.10384	-31		chrIII	65256	65762	2.79865	59		chrIV	755310	755843	3.37798	-51
chrII	723966	724682	3.92194	-61		chrIII	192806	193577	3.80339	-105		chrIII	52504	52891	3.403	53		chrIII	279599	280260	3.20837	-110		chrIII	69645	70507	2.72501	-74		chrIV	765063	766082	4.50286	-133
chrII	727912	729146	3.91725	-356		chrIII	205193	206015	2.56749	-207		chrIII	58498	59265	3.43901	-144		chrIII	286541	287042	3.15773	30		chrIII	73582	75328	2.90141	-469		chrIV	775800	776314	4.40847	-106
chrII	729863	730704	3.21271	-103		chrIII	206300	207124	3.96305	-68		chrIII	61001	61835	3.34401	-240		chrIII	288969	289824	3.05224	-139		chrIII	78984	79579	2.93666	14		chrIV	778928	779374	2.88035	108
chrII	734394	736521	2.90049	72		chrIII	207647	208475	4.47221	-111		chrIII	62959	63658	3.44986	-27		chrIV	10985	12194	2.61674	1770		chrIII	85125	85745	2.86227	333		chrIV	780971	781710	3.02461	-82
chrII	734394	736521	2.90049	72		chrIII	209797	210872	3.97414	88		chrIII	65312	65755	3.50621	34		chrIV	15488	18116	2.91785	598		chrIII	94010	94576	2.93535	-23		chrIV	784061	785087	2.86578	-297
chrII	738010	738893	3.85386	-83		chrIII	211250	212697	3.93596	45		chrIII	69700	70422	3.4612	-89		chrIV	21414	22949	3.15846	426		chrIII	95266	96640	2.62474	-190		chrIV	789029	790437	3.56338	284
chrII	739398	740083	2.37387	-100		chrIII	213642	215455	4.61197	-445		chrIII	78942	79438	3.52203	28		chrIV	30355	30822	3.16525	-68		chrIII	106564	107222	2.7752	-40		chrIV	808051	808669	4.55058	36
chrII	740913	741568	3.07463	-58		chrIII	216136	216911	3.28096	-173		chrIII	83273	84050	3.26938	42		chrIV	31889	32548	3.1964	-77		chrIII	107629	108265	2.92895	-74		chrIV	813943	814707	3.42737	-127
chrII	742382	743062	2.74006	-146		chrIII	222841	224672	3.88528	473		chrIII	94065	94582	3.44719	-54		chrIV	36350	37052	2.99795	-96		chrIII	108674	109320	2.89471	-108		chrIV	816395	817057	2.68877	-152
chrII	744086	745156	4.29604	-223		chrIII	228177	228846	3.15778	-7		chrIII	95446	96558	3.34471	-239		chrIV	38223	38747	3.09536	-2		chrIII	111427	112058	2.88658	-68		chrIV	827145	827867	4.5276	-76
chrII	747550	748080	1.5683	-12		chrIII	231256	231910	4.46006	83		chrIII	106588	107202	3.33814	-42		chrIV	41998	42986	3.07385	-208		chrIII	113950	114365	2.90183	388		chrIV	841707	842507	3.85574	-112
chrII	749102	749844	3.27504	-102		chrIII	240239	240953	4.43777	-53		chrIII	107609	108266	3.4012	-83		chrIV	51799	52724	1.60148	-89		chrIII	116021	117322	2.66096	987		chrIV	844591	845090	3.00774	20
chrII	756681	757596	3.00196	-33		chrIII	242060	242939	4.84979	-148		chrIII	118099	118889	3.40809	-126		chrIV	64736	65490	3.19875	-95		chrIII	117986	119074	2.8154	-90		chrIV	847761	848687	2.74538	153
chrII	767329	768542	3.54198	-304		chrIII	245943	247386	4.62762	-82		chrIII	123944	124397	3.47267	-1168		chrIV	65727	66441	3.18206	-409		chrIII	124701	125252	2.8564	1753		chrIV	850755	851393	2.34492	-75
chrII	779240	779943	3.62324	-75		chrIII	248322	250153	4.73185	263		chrIII	131372	132799	3.5287	-544		chrIV	68391	69166	3.0543	-173		chrIII	131352	132739	2.08558	-504		chrIV	855855	856599	2.58536	-90
chrII	782454	782843	2.88794	58		chrIII	252292	253245	5	-76		chrIII	143027	143990	3.29055	-125		chrIV	69995	70494	3.10063	74		chrIII	143104	144293	2.81871	65		chrIV	858964	859609	3.26557	-59
chrII	783973	787369	3.75202	-598		chrIII	253999	254747	4.02715	2		chrIII	146977	148142	3.50466	74		chrIV	73983	74698	2.86766	-423		chrIII	146904	148058	2.77849	153		chrIV	867207	867771	4.86721	33
chrII	792416	793081	2.73236	-100		chrIII	258368	259075	3.98899	-71		chrIII	154094	155563	3.38695	-170		chrIV	77636	78726	3.02953	-215		chrIII	151827	153160	2.79658	-343		chrIV	906886	907733	2.69936	-17
chrII	796636	798488	1.88742	960		chrIII	259308	259891	2.41154	22		chrIII	160142	160769	3.36508	-83		chrIV	80154	80966	3.21303	-148		chrIII	160151	160753	2.90011	-79		chrIV	923682	924744	2.65644	-407
chrII	798777	801697	3.4748	5		chrIII	262314	265366	4.3759	-136		chrIII	161997	162364	3.24799	41		chrIV	86944	88580	2.37473	250		chrIII	161997	162336	2.80653	55		chrIV	935710	936626	2.7225	-276
chrII	801962	802640	1.89515	1778		chrIII	266890	267661	3.71986	-158		chrIII	166092	166739	3.49287	-77		chrIV	93647	94295	3.21426	-226		chrIII	166001	166723	2.92315	-23		chrIV	940522	941330	3.63088	-110
chrII	804634	807637	3.61525	785		chrIII	272486	273342	2.35494	-51		chrIII	167896	168592	3.46138	-245		chrIV	106708	107401	2.96296	-153		chrIII	167768	168320	2.90079	-45		chrIV	964723	965292	3.03088	-105
chrII	808314	810221	3.29878	-171		chrIII	274014	274830	1.86553	18		chrIII	169580	170178	3.33038	-1880		chrIV	111189	111721	3.09675	-125		chrIII	172007	173719	2.73234	-439		chrIV	1001865	1002396	3.48562	-108
chrIII	17104	17594	4.21479	59		chrIII	279579	280297	3.25655	-118		chrIII	172185	173660	3.50678	-499		chrIV	115844	116566	3.2039	-116		chrIII	176284	177194	2.82009	-301		chrIV	1020199	1021008	4.43434	-143
chrIII	21852	22564	2.697	-102		chrIII	286565	287052	3.89788	47		chrIII	178692	179606	3.51142	-371		chrIV	121483	122383	3.10171	-283		chrIII	178684	179736	2.92471	-310		chrIV	1054911	1055978	2.52801	233
chrIII	23062	23842	4.10622	-73		chrIII	289011	289867	4.19948	-181		chrIII	185732	186516	3.46921	-365		chrIV	124840	125312	3.16717	-78		chrIII	185706	186558	2.77426	-357		chrIV	1059329	1059995	2.66078	35
chrIII	24102	25045	1.56351	-194		chrIII	305003	306228	2.75579	-149		chrIII	190444	190892	3.53148	76		chrIV	137795	138357	3.14399	-215		chrIII	190446	190909	2.78986	86		chrIV	1062565	1063669	4.71789	-235
chrIII	27119	28191	2.90494	-274		chrIII	309504	311280	3.56448	-566		chrIII	192772	193520	3.4677	-128		chrIV	141444	142238	3.16768	-120		chrIII	192696	193521	2.93636	-91		chrIV	1071212	1071824	2.42399	-132
chrIII	30903	31825	4.79427	-85		chrIV	10838	12342	5	1770		chrIII	205206	206050	3.36813	-231		chrIV	145205	145879	3.0122	-24		chrIII	196821	197494	2.82587	27		chrIV	1074960	1075397	3.30396	-8
chrIII	35165	35815	2.87544	-97		chrIV	15207	17529	3.75284	164		chrIII	206341	207109	3.34717	-81		chrIV	147410	148435	3.21381	-268		chrIII	205163	206004	2.76033	-187		chrIV	1078187	1078736	3.50901	-13
chrIII	38676	39527	2.14137	-301		chrIV	20756	23016	4.33047	722		chrIII	207651	208448	3.43097	-100		chrIV	162880	163548	3.1264	-60		chrIII	206297	207163	2.92147	-86		chrIV	1087346	1087914	4.34954	49
chrIII	40553	41960	1.3553	-231		chrIV	30321	30906	3.44802	-43		chrIII	209792	210903	3.462	75		chrIV	166794	167986	3.15708	-136		chrIII	207592	208575	2.71135	-134		chrIV	1107766	1109006	4.50597	-98
chrIII	42898	43499	2.3627	1034		chrIV	31868	32584	3.66536	-70		chrIII	211253	212334	3.42187	-135		chrIV	171970	172763	3.19937	-114		chrIII	209784	210930	2.68096	66		chrIV	1113757	1114426	4.8793	-65
chrIII	44083	44769	2.07104	11		chrIV	36331	37173	3.59363	-45		chrIII	213657	215292	3.48203	404		chrIV	174330	175095	3.21275	-125		chrIII	211274	212731	2.89269	74		chrIV	1116371	1117343	3.16906	-94
chrIII	46628	47285	3.02769	-52		chrIV	38178	38731	4.23708	-32		chrIII	216230	216943	3.51441	-110		chrIV	176107	176997	3.00999	-221		chrIII	213656	215534	2.71991	-399		chrIV	1124683	1126242	3.69994	161
chrIII	48185	48517	1.97589	13		chrIV	42016	43053	4.26827	-165		chrIII	219829	220514	3.37155	-105		chrIV	182715	183554	3.01285	-117		chrIII	216169	216977	2.95027	-124		chrIV	1127279	1128112	3.89259	-101
chrIII	52520	52907	2.55121	69		chrIV	49652	50307	1.9137	-1949		chrIII	222838	224676	3.48746	473		chrIV	184508	185225	3.13729	-58		chrIII	222681	224631	2.80511	-428		chrIV	1129438	1129935	3.35526	99
chrIII	58499	59281	2.92267	-136		chrIV	51793	52705	5	-76		chrIII	228153	228855	3.48283	1		chrIV	190188	190924	3.17727	30		chrIII	228121	228864	2.88895	12		chrIV	1135120	1136033	4.65566	-146
chrIII	60014	60666	2.0751	833		chrIV	56470	56777	2.51546	-278		chrIII	231243	231748	3.48211	-4		chrIV	198103	198935	2.97296	-343		chrIII	231256	232017	2.90195	137		chrIV	1145967	1146613	3.28896	-29
chrIII	60968	61854	2.66042	-238		chrIV	64646	67291	4.40425	-524		chrIII	236143	237220	3.51207	-360		chrIV	199495	200283	3.16969	-107		chrIII	236017	236784	2.93178	-79		chrIV	1150255	1150871	3.5737	-43
chrIII	62972	63677	3.12308	-43		chrIV	68412	69304	4.16687	-252		chrIII	238483	239118	3.221	-254		chrIV	202406	203035	3.18666	-151		chrIII	240209	241170	2.81813	-147		chrIV	1168514	1169358	3.15228	-242
chrIII	65324	65748	3.46074	32		chrIV	69936	70442	4.10069	130		chrIII	240252	241054	3.47335	-110		chrIV	220982	221426	3.16847	-433		chrIII	241835	242944	2.77157	-38		chrIV	1173943	1174582	3.34365	-87
chrIII	69723	70410	3.39752	-83		chrIV	73159	74703	4.87079	-13		chrIII	241923	242896	2.79622	-58		chrIV	223881	224242	3.17678	-242		chrIII	245960	247398	2.92321	-96		chrIV	1177943	1178776	3.58593	-186
chrIII	78957	79487	3.49375	60		chrIV	77681	78709	4.30079	-229		chrIII	246114	247260	3.36933	-104		chrIV	228686	229245	3.09697	-205		chrIII	248305	249275	2.78638	25		chrIV	1185858	1186419	4.33118	32
chrIII	83279	84037	1.94444	38		chrIV	79703	81150	3.21659	-15		chrIII	248474	249245	3.50886	-45		chrIV	245249	246120	3.06277	-103		chrIII	249697	250179	2.89321	107		chrIV	1198553	1199301	2.83832	-230
chrIII	94097	94527	2.19749	-42		chrIV	83826	85388	2.67226	337		chrIII	249741	250155	3.32103	97		chrIV	251238	251884	2.60645	-5		chrIII	252209	253191	2.63143	-72		chrIV	1203901	1204628	3.53105	-55
chrIII	95438	96538	4.65664	-225		chrIV	93618	94942	3.149	-325		chrIII	252331	253160	3.38224	-99		chrIV	254914	255460	3.20196	-61		chrIII	253987	254807	2.84782	26		chrIV	1206030	1206633	4.9095	51
chrIII	105341	105989	1.83248	-117		chrIV	103090	103793	3.02906	-89		chrIII	254048	254675	3.5221	-9		chrIV	258425	259238	2.82302	-83		chrIII	258317	259041	2.95248	-28		chrIV	1218821	1219555	2.85308	-78
chrIII	106590	107199	2.41289	-42		chrIV	104302	105185	2.13175	-193		chrIII	258341	259013	3.5352	-26		chrIV	263787	264325	3.17406	54		chrIII	262289	265379	2.92159	-142		chrIV	1222194	1222880	2.98007	-222
chrIII	107613	108258	3.00343	-85		chrIV	106237	107376	4.53856	66		chrIII	262373	263688	3.49334	115		chrIV	267076	267931	3.1781	-194		chrIII	266867	267877	2.86868	-62		chrIV	1224578	1225070	3.89474	67
chrIII	115977	117280	2.31907	944		chrIV	111209	111801	4.63972	-75		chrIII	264109	265323	3.39924	-249		chrIV	271587	272693	2.82153	-239		chrIII	272407	273307	2.9028	6		chrIV	1229331	1229862	3.94328	12
chrIII	118101	118886	2.58865	-126		chrIV	115794	116540	2.29156	-154		chrIII	266953	267449	3.4873	-233		chrIV	276343	277047	3.21022	-114		chrIII	279538	280376	2.90134	-137		chrIV	1275361	1277920	4.47737	528
chrIII	123993	124326	2.57935	-1157		chrIV	121480	122470	4.49913	-241		chrIII	279589	280304	3.48865	-127		chrIV	283017	283683	3.18428	-69		chrIII	286511	287144	2.8244	66		chrIV	1287587	1289586	4.33425	272
chrIII	127214	127605	1.51038	-680		chrIV	124827	125286	4.03916	-59		chrIII	286537	287024	3.49396	19		chrIV	284873	285311	3.18017	73		chrIII	288887	289911	2.85991	-141		chrIV	1294018	1295016	5	-123
chrIII	131348	132792	2.93452	-528		chrIV	126024	126893	5	-328		chrIII	288985	289806	3.53023	-138		chrIV	286624	287378	3.12218	-58		chrIII	302760	303987	2.7629	-344		chrIV	1317508	1318068	3.47588	-15
chrIII	143035	144066	4.43345	-83		chrIV	137701	138595	3.99368	-143		chrIII	291069	291579	3.39257	1685		chrIV	292049	293090	2.71741	-211		chrIII	305017	306202	2.84469	-143		chrIV	1319024	1320347	3.66514	155
chrIII	146959	148128	3.22284	90		chrIV	141333	142259	3.63657	-75		chrIII	305194	306232	3.38407	-246		chrIV	294606	295179	3.19128	-134		chrIII	309570	311287	2.9284	-529		chrIV	1324877	1325521	4.68532	102
chrIII	151777	153137	2.43463	-380		chrIV	145250	145926	4.12305	-70		chrIII	309644	311204	3.38853	-534		chrIV	296070	296840	3.18084	-126		chrIV	5442	5742	2.88311	-393		chrIV	1330934	1331457	4.0012	-41
chrIII	154068	155562	2.77744	-156		chrIV	147367	148474	3.24219	-270		chrIV	5427	5782	3.41729	-380		chrIV	304593	305389	3.19439	-246		chrIV	7901	9376	2.93747	1117		chrIV	1358671	1359274	2.73503	-71
chrIII	160148	160792	2.49159	-97		chrIV	158528	158854	1.91731	44		chrIV	7889	9401	3.49015	1111		chrIV	314771	315204	3.03953	-240		chrIV	15065	17481	2.90128	69		chrIV	1366585	1367792	4.48367	-296
chrIII	166102	166726	3.24956	-75		chrIV	162859	164597	3.83637	314		chrIV	10822	12183	3.11372	-1747		chrIV	320017	320600	2.75844	-189		chrIV	20890	23109	2.8896	608		chrIV	1385500	1387119	5	237
chrIII	167897	168566	2.61829	-233		chrIV	166799	168016	4.21623	-154		chrIV	15056	17974	3.46449	311		chrIV	325821	326759	2.99844	-141		chrIV	30258	30892	2.93671	-82		chrIV	1394287	1395321	4.84982	-230
chrIII	169612	170162	2.28304	-1888		chrIV	169300	169718	3.29254	99		chrIV	20666	22937	3.52054	806		chrIV	337064	337757	3.19352	-76		chrIV	31889	32574	2.90268	-64		chrIV	1398658	1399250	2.82783	-61
chrIII	176305	177208	1.81222	-319		chrIV	172022	172844	3.95302	-48		chrIV	30321	30875	3.20282	-59		chrIV	339900	340397	3.19965	-15		chrIV	36359	37077	2.82257	-79		chrIV	1433692	1434481	2.07559	181
chrIII	178676	179635	3.60168	-364		chrIV	174323	175261	3.49797	-126		chrIV	31852	32548	3.50105	-96		chrIV	341070	341894	3.15489	-137		chrIV	38286	38758	2.91201	35		chrIV	1436027	1437238	5	-297
chrIII	185731	186524	3.68031	-361		chrIV	176147	177028	3.70992	-185		chrIV	36351	37049	3.32064	-97		chrIV	352297	353042	3.2066	-207		chrIV	41979	43072	2.83242	-174		chrIV	1443119	1445385	1.68234	-849
chrIII	190446	190906	3.50606	84		chrIV	178941	180326	2.48152	1300		chrIV	38289	38736	3.52092	26		chrIV	372065	372477	2.85827	23		chrIV	46210	46976	2.89653	-675		chrIV	1446705	1447202	2.37186	40
chrIII	192784	193516	3.5286	-132		chrIV	182743	183558	4.21723	-133		chrIV	42012	43004	3.38446	-192		chrIV	375062	375517	2.94419	-1		chrIV	49531	50354	2.90866	-1912		chrIV	1472729	1473226	2.0729	21
chrIII	205194	206031	2.70124	-216		chrIV	184510	185220	3.56688	-60		chrIV	46165	48291	3.51243	803		chrIV	376154	376701	3.12406	52		chrIV	51557	52740	2.70414	24		chrIV	1483118	1484045	3.12722	-179
chrIII	206339	207094	3.422	-73		chrIV	190189	191092	3.90383	-55		chrIV	49274	50275	3.53162	-1744		chrIV	381148	382123	3.11352	-198		chrIV	64561	66440	2.94057	259		chrIV	1492815	1493589	3.63906	-1384
chrIII	207668	208464	4.18308	-116		chrIV	198139	200283	4.75275	521		chrIV	51842	52687	2.99593	-92		chrIV	388458	389036	3.21531	154		chrIV	68316	69282	2.89542	-193		chrIV	1528246	1528874	3.76174	2239
chrIII	209800	210850	2.98107	98		chrIV	202230	203214	3.28809	-152		chrIV	68422	69188	3.50907	-199		chrIV	393613	394550	3.03427	-135		chrIV	69941	70489	2.92594	104		chrV	20908	21872	4.151	1801
chrIII	211278	212516	3.89878	-32		chrIV	215510	216153	1.38718	-697		chrIV	70034	70478	3.52449	63		chrIV	396852	397731	3.13654	-245		chrIV	73985	74693	2.8186	-421		chrV	39285	39794	2.85522	-3
chrIII	213577	215307	3.84828	371		chrIV	219016	219533	2.60803	13		chrIV	73144	74706	3.23727	-7		chrIV	398853	399622	3.20444	-102		chrIV	77593	78739	2.73056	-200		chrV	46950	47389	3.11216	2
chrIII	216178	216958	3.26349	-129		chrIV	221061	221361	2.30867	-440		chrIV	77637	78702	3.48084	-204		chrIV	403101	403618	3.10041	-69		chrIV	79385	81104	2.94954	167		chrV	51334	52136	3.04329	-196
chrIII	222831	224649	3.93959	490		chrIV	222207	222606	2.63836	-20		chrIV	86951	88516	3.44844	222		chrIV	404736	405150	3.19006	14		chrIV	86837	88914	2.72875	364		chrV	58007	59324	5	288
chrIII	228136	228855	2.23939	9		chrIV	245217	246127	4.41381	-90		chrIV	93655	94298	3.45108	-232		chrIV	423250	424390	3.20774	-310		chrIV	93595	94402	2.93329	-254		chrV	60637	61283	3.41789	-109
chrIII	231181	231755	3.57857	-32		chrIV	247054	248458	3.73757	-144		chrIV	97759	98769	3.29777	-211		chrIV	426720	427609	3.16483	-199		chrIV	97562	100228	2.69021	420		chrV	64899	65341	3.33402	47
chrIII	236146	237257	2.71988	-380		chrIV	251050	251854	4.8587	-114		chrIV	99042	99856	3.48881	-112		chrIV	428378	429281	3.00909	-237		chrIV	103088	103563	2.87363	27		chrV	70062	70795	4.73292	-49
chrIII	238491	239118	2.28043	-250		chrIV	254879	255675	3.43806	-151		chrIV	103115	103761	3.27107	-85		chrIV	431131	432437	2.94734	-267		chrIV	106399	107398	2.75595	158		chrV	80205	80812	3.06404	47
chrIII	240278	241260	3.83168	-226		chrIV	258319	259212	4.85577	-149		chrIV	106698	107374	3.50857	-172		chrIV	442065	442548	3.17546	2		chrIV	111196	111779	2.93848	-92		chrV	89824	90517	2.83207	-87
chrIII	241922	242878	5	-48		chrIV	263818	264282	3.52882	60		chrIV	111203	111678	3.51214	-139		chrIV	471363	472177	3.18916	-83		chrIV	115884	116559	2.87853	-99		chrV	110915	111787	5	-70
chrIII	246115	247277	4.60105	-113		chrIV	265167	265512	2.76282	-376		chrIV	121483	122317	3.50288	-308		chrIV	483636	483993	3.11904	45		chrIV	121442	122479	2.74152	-255		chrV	121120	121758	3.36092	-32
chrIII	248468	249243	3.84967	-41		chrIV	267053	268009	2.67825	-167		chrIV	124871	125288	3.41872	-82		chrIV	485676	487076	3.21162	68		chrIV	124807	125312	2.85624	-62		chrV	126161	126929	4.37654	-84
chrIII	249766	250129	2.65034	97		chrIV	271610	272679	3.53596	-244		chrIV	126004	126921	1.6316	-324		chrIV	489385	489772	3.20449	71		chrIV	125619	126957	2.5976	-450		chrV	156252	157168	3.16697	-93
chrIII	252324	253147	4.38161	-108		chrIV	274365	275046	3.16265	170		chrIV	137653	138421	3.23442	-254		chrIV	494104	494646	3.1118	-107		chrIV	137683	138428	2.91974	-235		chrV	162322	163143	4.20357	10
chrIII	254012	254660	3.10369	-35		chrIV	276019	277069	3.86583	37		chrIV	141427	142239	3.11769	-112		chrIV	497166	497597	3.13844	-64		chrIV	141427	142271	2.90872	-128		chrV	171594	172397	3.86189	-119
chrIII	258337	258983	3.66941	-9		chrIV	282913	283896	3.16749	-14		chrIV	145239	145910	3.48498	-57		chrIV	502983	503681	3.20655	-59		chrIV	145199	145792	2.68641	22		chrV	178569	179091	4.03155	-11
chrIII	259359	259803	1.71246	3		chrIV	284766	285308	3.89535	128		chrIV	147480	148430	3.45288	-236		chrIV	524434	525144	3.15295	-76		chrIV	147480	148496	2.92084	-203		chrV	187101	188569	3.70396	-442
chrIII	262360	263703	3.46875	116		chrIV	286475	287362	3.95848	-140		chrIV	156203	156593	3.41651	80		chrIV	530369	531457	2.32362	-216		chrIV	158508	158953	2.86832	4		chrV	194281	194716	2.06216	40
chrIII	264109	265327	4.24084	-251		chrIV	289699	291021	2.58319	-279		chrIV	158537	159088	3.22177	-78		chrIV	539451	540127	3.0524	-14		chrIV	166361	168123	2.72838	12		chrV	200884	201408	3.39512	70
chrIII	266899	267453	3.83857	-258		chrIV	292170	293099	4.60808	-146		chrIV	162900	164540	3.52427	322		chrIV	546325	546922	3.14351	-18		chrIV	169282	169744	2.88401	95		chrV	204896	205560	5	-23
chrIII	272561	274578	3.28595	-707		chrIV	294363	295427	3.5709	-136		chrIV	166836	167986	3.49199	-157		chrIV	548118	548584	3.19686	-41		chrIV	172003	172915	2.95552	-22		chrV	212966	213586	3.10566	-99
chrIII	279585	280304	2.74639	-125		chrIV	295812	297010	4.17284	-82		chrIV	169322	169749	3.50056	72		chrIV	553054	553550	3.2104	48		chrIV	174284	175202	2.93803	-155		chrV	214477	215209	3.19614	-96
chrIII	286571	287024	3.22625	36		chrIV	304585	305368	3.65728	-260		chrIV	172027	172710	3.46833	-112		chrIV	557798	558315	3.14246	3		chrIV	176141	177065	2.94001	-170		chrV	229220	230018	4.01387	-138
chrIII	289020	289833	3.19051	-169		chrIV	312188	313204	2.64918	-225		chrIV	174311	175110	3.4915	-123		chrIV	560451	560960	3.20572	-81		chrIV	182633	183639	2.89621	-118		chrV	254207	254973	4.30083	-66
chrIII	295620	296770	2.70682	1756		chrIV	314402	315296	3.9449	-101		chrIV	176146	176972	3.45458	-214		chrIV	565489	566187	3.17322	-89		chrIV	184459	185266	2.89092	-62		chrV	271412	272724	2.89929	300
chrIII	302801	304130	2.75274	-436		chrIV	319888	320651	2.77129	-150		chrIV	179136	180330	3.42526	1399		chrIV	569681	570908	3.08764	-354		chrIV	189889	191076	2.93344	103		chrV	301156	301626	3.32835	936
chrIII	305150	306220	2.50934	-218		chrIV	325889	326678	4.59272	-135		chrIV	182753	183525	3.43361	-121		chrIV	583297	583878	3.08825	-123		chrIV	198054	198955	2.84148	-329		chrV	326577	327440	5	22
chrIII	309627	311193	2.10758	-548		chrIV	337042	337746	4.02529	-93		chrIV	184498	185189	3.52533	-81		chrIV	596818	597273	3.1907	-110		chrIV	199400	200415	2.78622	-88		chrV	327865	328795	3.09295	-147
chrIV	5427	5761	2.86352	-391		chrIV	339894	340377	4.06064	-2		chrIV	190211	191053	3.52397	-46		chrIV	603623	604243	3.18841	-75		chrIV	202268	203058	2.89516	-93		chrV	332482	333054	4.02144	62
chrIV	7901	10207	1.67423	702		chrIV	341097	341901	2.45329	-120		chrIV	198138	198937	3.48976	-362		chrIV	609807	610678	2.99869	-162		chrIV	221035	221380	2.69972	-437		chrV	347406	348397	3.44465	-290
chrIV	7901	10207	1.67423	702		chrIV	344413	345990	4.01507	-249		chrIV	199424	200287	3.51727	-124		chrIV	613825	614334	3.20998	-76		chrIV	223889	224303	2.92989	-208		chrV	353455	354024	2.2035	-1400
chrIV	10783	12169	5	-1720		chrIV	357391	359353	3.2368	-1613		chrIV	202350	203092	3.31155	-151		chrIV	617009	617628	2.85519	-149		chrIV	245191	246127	2.8877	-77		chrV	358736	359671	4.49322	-143
chrIV	15072	17995	4.35443	330		chrIV	361054	361514	2.8262	1		chrIV	219062	219571	3.06265	-29		chrIV	617910	618676	3.01455	13		chrIV	247254	248582	2.92501	-306		chrV	371721	372217	3.75333	44
chrIV	20692	22947	3.73169	788		chrIV	372108	372454	2.85334	33		chrIV	223872	224262	3.20328	-237		chrIV	625845	626557	3.12322	-203		chrIV	251040	251996	2.75343	-48		chrV	374277	374882	3.81534	-35
chrIV	30294	30880	2.66256	-70		chrIV	373443	374122	2.49585	-175		chrIV	245245	246089	3.47996	-85		chrIV	628161	628966	1.68263	-30		chrIV	254881	255635	2.92795	-132		chrV	381864	382325	2.51604	8
chrIV	31846	32568	2.70886	-89		chrIV	374824	375603	3.16652	75		chrIV	246688	248452	3.26909	42		chrIV	629650	630140	3.21482	19		chrIV	258375	259386	2.83459	-34		chrV	393760	394175	2.68019	-256
chrIV	33780	34387	2.08019	-166		chrIV	376113	376682	4.58531	82		chrIV	251080	251839	3.43801	-106		chrIV	643607	644049	3.17622	9		chrIV	263681	264327	2.78783	106		chrV	398957	399580	2.89093	-214
chrIV	36337	37052	2.64244	-102		chrIV	378103	378815	2.61615	-14		chrIV	254921	255773	3.48315	-221		chrIV	657110	657908	3.05508	-42		chrIV	266938	268011	2.86381	-223		chrV	400517	401451	4.18419	-142
chrIV	38101	38730	3.48073	-71		chrIV	381173	383277	3.692	-787		chrIV	258401	259195	3.38091	-117		chrIV	664629	665232	3.21435	-21		chrIV	271605	272722	2.93696	-225		chrV	403999	404934	4.87321	-115
chrIV	42012	42997	3.52046	-195		chrIV	388478	389035	3.92102	144		chrIV	263805	264318	3.26361	48		chrIV	666533	667434	3.17385	-20		chrIV	274494	275081	2.87057	88		chrV	409185	410024	3.03914	-542
chrIV	46178	48299	3.7652	792		chrIV	393582	394500	4.0401	-129		chrIV	265105	265482	3.33446	-330		chrIV	675401	676352	3.17859	-210		chrIV	276013	277090	2.90523	29		chrV	413935	414892	3.9321	-67
chrIV	49123	50287	2.8002	-1674		chrIV	397008	397742	3.15095	-162		chrIV	267042	267949	3.3781	-202		chrIV	681362	682473	3.06505	-257		chrIV	281482	281998	2.90315	108		chrV	415548	416960	2.23112	395
chrIV	51852	52687	4.98064	-97		chrIV	398763	399659	3.95211	-129		chrIV	271678	272681	3.50693	-209		chrIV	683248	683936	3.14795	-11		chrIV	282878	283866	2.9011	-47		chrV	431944	432610	2.87616	-218
chrIV	56511	56784	1.5152	-302		chrIV	403010	403598	4.35614	-13		chrIV	274549	275073	3.15241	65		chrIV	685368	686132	3.08837	-107		chrIV	284729	285336	2.8925	132		chrV	464520	465302	2.58984	-69
chrIV	64665	66463	4.04101	322		chrIV	404682	405107	3.60178	62		chrIV	276283	277060	3.51533	-91		chrIV	687594	688382	3.13745	220		chrIV	286486	287375	2.71512	-128		chrV	472195	472642	2.49022	5
chrIV	68438	69256	3.83995	-241		chrIV	417174	417462	2.91894	-610		chrIV	281616	282016	3.36585	32		chrIV	692844	694515	2.98681	95		chrIV	289714	291015	2.849	-284		chrV	522232	522966	5	70
chrIV	70027	70433	2.98484	89		chrIV	421445	424506	3.58383	534		chrIV	282939	283683	3.45231	-108		chrIV	716327	716989	3.12105	-36		chrIV	292187	293130	2.8534	-122		chrV	535852	536639	3.96572	-54
chrIV	73135	74732	5	-16		chrIV	421445	424506	3.58383	534		chrIV	284837	285316	3.51399	88		chrIV	730144	730840	3.15967	-86		chrIV	294364	295307	2.92078	-77		chrV	541271	541932	3.27345	-88
chrIV	76048	76817	1.35187	112		chrIV	426678	427543	2.1861	-177		chrIV	286510	287352	3.51307	-128		chrIV	733720	734405	3.21016	-75		chrIV	295942	296890	2.8973	-87		chrV	552327	552795	2.68235	36
chrIV	77638	78705	3.79873	-206		chrIV	428441	429253	4.25135	-220		chrIV	289668	290888	3.33483	-197		chrIV	739702	740251	3.14109	20		chrIV	300642	301621	2.90399	-133		chrV	558972	559733	3.36852	-101
chrIV	79365	81029	3.2375	215		chrIV	431157	432563	3.9245	-343		chrIV	292028	293112	3.36918	-211		chrIV	743603	744580	2.97471	-218		chrIV	304532	305441	2.88987	-250		chrV	560407	561180	3.3021	1340
chrIV	83771	85644	2.53345	438		chrIV	433114	433807	2.40491	-36		chrIV	294587	295285	3.50814	-177		chrIV	745859	747066	2.63159	-275		chrIV	309887	310556	2.86795	-100		chrV	562533	563227	3.80931	-255
chrIV	86932	88529	1.46067	219		chrIV	442072	442520	4.06899	13		chrIV	295999	296895	3.49969	-118		chrIV	751302	751854	3.20042	-53		chrIV	312208	313216	2.84025	-241		chrV	573095	573682	2.91584	1909
chrIV	89643	90340	1.58416	-184		chrIV	470746	472114	2.00398	-423		chrIV	304595	305378	3.49373	-250		chrIV	755004	755841	3.20009	-205		chrIV	314592	315250	2.94606	-173		chrVI	2314	3140	3.15437	-112
chrIV	93638	94380	2.45858	-264		chrIV	472892	474394	3.20724	-403		chrIV	312294	313148	3.3163	-250		chrIV	765107	766063	3.03265	-121		chrIV	319908	320612	2.87515	-140		chrVI	12211	12701	2.26016	-473
chrIV	97766	98779	4.69714	-202		chrIV	484954	487179	3.75786	377		chrIV	314316	315331	3.51639	-76		chrIV	769411	769704	3.15273	33		chrIV	325792	326884	2.9173	-189		chrVI	39867	40756	4.04977	-109
chrIV	99043	99882	3.59835	-98		chrIV	494013	494773	3.20069	-125		chrIV	319956	320614	3.38997	-165		chrIV	771535	771987	3.21059	-116		chrIV	337034	337752	2.89458	-94		chrVI	48979	49480	2.46246	91
chrIV	100700	101181	1.86382	126		chrIV	497117	497568	3.87687	-25		chrIV	325882	326728	3.5021	-156		chrIV	775791	776315	3.08726	-110		chrIV	339819	340490	2.94652	-21		chrVI	55702	56753	4.27224	-108
chrIV	103111	103788	2.49006	-97		chrIV	502961	503792	2.92739	-104		chrIV	337049	337762	3.53088	-81		chrIV	778898	779439	3.17272	126		chrIV	341056	341917	2.9348	-132		chrVI	63705	64236	3.42546	22
chrIV	104342	105075	1.66375	-158		chrIV	524402	525106	4.3784	-41		chrIV	339875	340582	3.34699	-95		chrIV	780941	781720	3.18199	-92		chrIV	344409	346010	2.8681	-257		chrVI	81618	82331	3.85778	-63
chrIV	106404	107372	3.06936	147		chrIV	530096	531438	2.74315	-70		chrIV	341052	341890	3.49223	-148		chrIV	784056	785105	3.19219	-290		chrIV	352313	353097	2.95355	-172		chrVI	90757	91287	4.17579	36
chrIV	111223	111692	3.65859	-122		chrIV	533972	535645	2.93804	-227		chrIV	344756	345898	3.49357	-338		chrIV	788996	790450	3.04573	274		chrIV	357882	359264	2.90238	-1814		chrVI	109628	110514	4.15383	-141
chrIV	114469	114823	1.61831	-26		chrIV	539353	540126	4.22715	-63		chrIV	352231	353045	3.43512	-239		chrIV	802163	802558	2.98762	-139		chrIV	363348	364204	2.89204	-176		chrVI	115468	116274	3.76385	-128
chrIV	115819	116551	2.17737	-136		chrIV	544928	546000	2.38901	-1178		chrIV	356789	359342	3.0844	-1307		chrIV	808077	808629	3.01624	29		chrIV	372062	372463	2.90165	15		chrVI	118937	119759	5	-81
chrIV	121482	122340	3.94606	-305		chrIV	546321	546957	3.16942	-3		chrIV	361089	361612	3.3774	-66		chrIV	811386	811823	3.16539	27		chrIV	373396	374114	2.93788	-147		chrVI	148956	150336	2.67803	-370
chrIV	124859	125277	2.71573	-70		chrIV	548121	548549	3.3646	-25		chrIV	363385	364136	3.28428	-178		chrIV	813928	814706	3.16617	-135		chrIV	374900	375638	2.86374	20		chrVI	169649	170322	5	64
chrIV	125997	126896	5	-340		chrIV	553096	553586	2.9771	57		chrIV	372044	372477	3.36554	13		chrIV	816422	817052	3.13537	-141		chrIV	375980	376731	2.7883	124		chrVI	184133	184794	3.3723	-38
chrIV	137665	138440	3.5358	-238		chrIV	557837	558224	2.99984	29		chrIV	373474	374103	3.30616	-181		chrIV	819023	819575	3.1423	-103		chrIV	378073	378877	2.85092	-30		chrVI	194061	194992	4.79164	-285
chrIV	139009	139676	1.38947	-179		chrIV	560409	560855	2.86619	-7		chrIV	375044	375618	3.33168	-42		chrIV	820635	821487	3.19486	-234		chrIV	381040	381987	2.9264	-76		chrVI	209655	211148	3.22064	-334
chrIV	141365	142247	2.91381	-85		chrIV	565422	566224	3.48508	-104		chrIV	376140	376802	3.36828	9		chrIV	827110	827856	3.09765	-99		chrIV	382530	383207	2.77668	1212		chrVI	228735	229794	5	-79
chrIV	145230	145926	3.77588	-60		chrIV	569535	570938	4.07084	-412		chrIV	378109	378821	3.23042	-20		chrIV	829224	829847	3.193	-49		chrIV	388328	389051	2.78411	211		chrVI	233486	234285	4.4651	-342
chrIV	147434	148427	2.80453	-260		chrIV	583280	583964	2.92139	-91		chrIV	381178	382257	3.51654	-280		chrIV	838223	838651	3.09501	45		chrIV	393531	394616	2.90529	-143		chrVI	241120	242288	4.06055	-267
chrIV	162892	163602	3.6598	-93		chrIV	596876	597231	2.544	-102		chrIV	382515	383164	3.38355	1241		chrIV	841680	842574	3.02841	-132		chrIV	396615	397767	2.79629	-346		chrVI	251464	252774	4.83809	-316
chrIV	163844	164548	2.29839	-94		chrIV	609852	610752	4.96559	-139		chrIV	388502	389065	3.4558	117		chrIV	844581	845215	3.15889	-37		chrIV	398955	399699	2.94458	-13		chrVII	27185	27987	2.5876	-102
chrIV	166552	167990	4.2535	-17		chrIV	611611	612591	2.45992	28		chrIV	393597	394516	3.38761	-145		chrIV	847748	848702	3.15235	154		chrIV	402916	403633	2.88504	16		chrVII	31739	32172	3.32646	46
chrIV	169325	169741	3.03583	75		chrIV	613597	614479	3.59933	-34		chrIV	396811	397730	3.44748	-266		chrIV	850742	851456	3.214	-100		chrIV	404686	405129	2.82179	49		chrVII	38547	39373	5	-63
chrIV	172031	172765	2.73865	-83		chrIV	617938	618652	4.25239	11		chrIV	398862	399651	3.35843	-83		chrIV	855836	856626	3.10886	-86		chrIV	417174	417457	2.85913	-608		chrVII	41215	41850	4.30673	35
chrIV	174313	175145	3.52963	-141		chrIV	625785	626493	2.40038	-141		chrIV	403091	403620	3.49768	-65		chrIV	858930	859614	3.04688	-74		chrIV	421606	422557	2.85192	-568		chrVII	55255	56759	3.9819	-211
chrIV	178998	180329	3.14758	1330		chrIV	628204	628969	4.52179	-53		chrIV	404748	405136	3.4413	15		chrIV	861387	862062	3.18994	-329		chrIV	423162	424604	2.84113	-326		chrVII	67019	67788	3.23909	-194
chrIV	182736	183485	3.67663	-93		chrIV	629655	630253	3.81963	78		chrIV	417124	417498	3.42389	-603		chrIV	867187	867787	2.1605	35		chrIV	426616	427594	2.95142	-171		chrVII	72900	73709	3.90347	-35
chrIV	184494	185167	3.21691	-94		chrIV	654902	655324	2.84946	100		chrIV	421588	422701	3.50034	-631		chrIV	903194	903663	3.02456	51		chrIV	428395	429391	2.90902	-174		chrVII	76717	77084	2.81486	7
chrIV	190179	191036	3.51428	-22		chrIV	657212	658455	3.64573	146		chrIV	423254	424411	3.47715	-323		chrIV	906849	907744	3.20053	-4		chrIV	431172	431820	2.93555	21		chrVII	80915	81622	3.49918	-83
chrIV	198145	198935	4.10418	-364		chrIV	664580	665273	3.34386	-17		chrIV	426729	427580	3.52278	-209		chrIV	917293	917713	3.1323	-68		chrIV	433202	433861	2.85275	35		chrVII	82048	82741	3.49336	21
chrIV	199456	200273	2.85226	-131		chrIV	666513	667940	4.03363	223		chrIV	428389	429242	3.47437	-251		chrIV	923617	924907	3.19047	-456		chrIV	441967	442564	2.94694	43		chrVII	83953	84837	3.34171	-138
chrIV	202377	203090	2.52446	-164		chrIV	670826	671547	3.07302	-82		chrIV	431145	432493	3.50112	-302		chrIV	930828	931488	3.19926	29		chrIV	445830	446462	2.74871	1432		chrVII	90967	91742	3.75963	-77
chrIV	211767	212340	1.40988	-8		chrIV	675352	676359	3.72742	-189		chrIV	433114	433795	3.23226	-42		chrIV	935672	936702	3.1857	-295		chrIV	455105	455539	2.90675	121		chrVII	92183	92862	3.86795	11
chrIV	219036	219573	2.63886	-17		chrIV	681264	682492	5	-261		chrIV	434351	436338	3.49365	1479		chrIV	940521	941359	3.08886	-124		chrIV	461244	464172	1.98413	-106		chrVII	114445	115141	3.17114	-129
chrIV	221027	221537	2.07714	-511		chrIV	683207	683976	4.0216	-11		chrIV	442059	442594	3.43671	-18		chrIV	943107	943772	3.15831	-20		chrIV	471080	472196	2.80922	-215		chrVII	122991	124785	3.49723	154
chrIV	222195	222584	1.90915	-37		chrIV	685341	686249	3.94222	-87		chrIV	455092	455539	3.34136	115		chrIV	944858	945546	3.17371	-50		chrIV	472795	474367	2.91482	424		chrVII	130893	131829	5	-164
chrIV	223898	224256	2.13043	-227		chrIV	687539	688419	1.7119	211		chrIV	472807	474295	3.14803	394		chrIV	949685	950759	3.12369	62		chrIV	477446	479107	2.77972	-78		chrVII	141388	142001	4.8854	31
chrIV	235425	236028	1.96669	800		chrIV	692921	694578	4.42074	165		chrIV	483413	484332	3.41618	-13		chrIV	952583	952992	3.13852	-12		chrIV	485597	487222	2.83803	34		chrVII	157398	158189	3.09505	-112
chrIV	245245	246094	3.92991	-88		chrIV	709194	709859	3.00853	-22		chrIV	484990	487148	3.49918	375		chrIV	959603	960351	3.15392	-175		chrIV	493981	494712	2.92933	-79		chrVII	172872	173477	2.31109	-96
chrIV	246669	248466	2.36509	44		chrIV	716249	717000	4.38598	-3		chrIV	494105	494769	3.43711	-169		chrIV	963261	963708	3.1788	73		chrIV	497118	497608	2.92967	-45		chrVII	180241	181063	4.44048	-48
chrIV	251007	251836	4.24583	-144		chrIV	730063	730817	3.40649	-138		chrIV	497175	497661	3.44259	-100		chrIV	964685	965335	3.14359	-103		chrIV	502974	503766	2.86366	-97		chrVII	182126	182709	3.52706	28
chrIV	258383	259207	4.47184	-120		chrIV	733576	734484	3.11801	-106		chrIV	502971	503739	3.4572	-82		chrIV	980230	980970	3.13151	-862		chrIV	524003	525172	2.93283	125		chrVII	190898	191416	2.70147	28
chrIV	263828	264269	2.77814	61		chrIV	739696	740215	4.41659	41		chrIV	521222	521965	3.06656	-222		chrIV	998237	998994	3.19709	-248		chrIV	530218	531514	2.83232	-169		chrVII	199888	200640	4.09668	-122
chrIV	265147	265480	2.44081	-350		chrIV	741432	742268	1.82801	-250		chrIV	524419	525154	3.34664	-74		chrIV	1001890	1002366	3.18779	-105		chrIV	534072	535736	2.91064	-322		chrVII	215753	216614	2.13234	-88
chrIV	266977	267968	2.53045	-225		chrIV	743525	744520	4.30892	-149		chrIV	530335	531536	3.34365	-239		chrIV	1003293	1004240	3.19812	-237		chrIV	539402	540194	2.78093	-5		chrVII	217156	217833	4.80322	-29
chrIV	268596	269600	1.58885	177		chrIV	745744	747053	5	-298		chrIV	534213	535648	3.45995	-349		chrIV	1020158	1020995	3.01067	-170		chrIV	546314	546993	2.71466	12		chrVII	225620	226583	2.32692	-297
chrIV	271655	272681	3.53169	-221		chrIV	751421	751929	3.54935	44		chrIV	539215	540128	3.51449	-131		chrIV	1024532	1025082	3.09054	-52		chrIV	548013	548631	2.89059	-12		chrVII	244907	245639	3.41979	-261
chrIV	274544	275124	2.34198	42		chrIV	754991	755818	3.48018	-223		chrIV	544443	546952	3.45477	-944		chrIV	1029965	1030614	3.21237	-241		chrIV	553049	553615	2.91706	66		chrVII	249619	250186	4.85552	34
chrIV	276264	277031	3.33044	-67		chrIV	765029	765985	3.5871	-199		chrIV	548092	548602	3.53469	-37		chrIV	1035335	1036137	3.20613	-161		chrIV	557805	558332	2.94657	-9		chrVII	295763	296152	2.42624	26
chrIV	281614	282003	2.27002	39		chrIV	771470	772055	3.6315	-114		chrIV	552949	553525	3.43701	-17		chrIV	1036874	1037420	3.14645	-48		chrIV	560385	560921	2.93596	-28		chrVII	299431	300299	5	-113
chrIV	282940	283699	1.93124	-99		chrIV	775726	776317	4.27477	-141		chrIV	557813	558395	3.49798	-44		chrIV	1039263	1039941	3.18772	-93		chrIV	565399	566254	2.94897	-100		chrVII	305877	306935	5	-133
chrIV	284821	285304	3.32663	102		chrIV	778932	779476	3.84977	161		chrIV	560437	561091	3.50459	-139		chrIV	1054772	1055960	3.20185	154		chrIV	569517	571164	2.87896	-308		chrVII	309891	310356	2.62104	49
chrIV	286526	287360	3.77721	-116		chrIV	780902	781781	3.48181	-81		chrIV	565421	566213	3.48762	-110		chrIV	1059270	1059982	2.98239	-1		chrIV	582279	582849	2.89868	-66		chrVII	314260	314937	2.68664	-32
chrIV	289648	291025	2.15423	-256		chrIV	783913	785128	3.91586	-306		chrIV	569491	570928	3.43128	-439		chrIV	1062561	1063655	2.96007	-244		chrIV	583255	583996	2.94129	-87		chrVII	319351	320353	4.92705	-1930
chrIV	292092	293087	4.1943	-191		chrIV	788959	790544	4.0727	303		chrIV	582295	582814	3.07798	-57		chrIV	1067364	1067957	3.12704	-70		chrIV	587511	588399	2.76646	-236		chrVII	321521	322194	5	76
chrIV	294577	295314	2.9427	-187		chrIV	794070	794787	1.49785	294		chrIV	583254	583922	3.45505	-123		chrIV	1071135	1071840	3.21256	-102		chrIV	596808	597344	2.93364	-80		chrVII	334521	335143	4.74299	-54
chrIV	295959	296902	3.9701	-102		chrIV	795102	795973	3.42482	-815		chrIV	596822	597284	3.47581	-103		chrIV	1073251	1073600	3.12095	62		chrIV	598133	598665	2.8836	-69		chrVII	346798	347494	4.44351	27
chrIV	300713	301605	3.89107	-160		chrIV	808124	808593	3.93152	35		chrIV	609837	610664	3.29917	-170		chrIV	1074963	1075361	3.06669	9		chrIV	602656	603212	2.89875	-65		chrVII	352859	353212	1.97553	-22
chrIV	304602	305379	3.08907	-246		chrIV	811381	811775	2.82362	54		chrIV	613805	614409	3.45784	-103		chrIV	1078170	1078820	3.15932	-46		chrIV	603582	604520	2.85584	43		chrVII	374523	375478	5	-86
chrIV	308292	308613	2.20034	29		chrIV	813943	814861	2.88668	-50		chrIV	621769	622295	3.50664	-80		chrIV	1084289	1085361	3.14543	-240		chrIV	609687	610800	2.72031	-163		chrVII	377222	377987	3.43505	-4
chrIV	309877	310677	1.72697	-155		chrIV	816329	817085	3.35851	-171		chrIV	625822	626584	3.4525	-205		chrIV	1087322	1087945	2.85625	53		chrIV	611636	612985	2.8632	238		chrVII	382937	383838	4.09101	-180
chrIV	312203	313160	2.23301	-211		chrIV	818805	819601	3.17135	-7		chrIV	628215	629069	3.40443	-108		chrIV	1092386	1092750	2.98735	-57		chrIV	613750	614318	2.92889	-30		chrVII	389546	390214	2.9551	-169
chrIV	314297	315304	3.75855	-53		chrIV	820647	821475	3.30321	-234		chrIV	629450	630162	3.52136	-70		chrIV	1093362	1093947	3.19174	-69		chrIV	616997	618616	2.95565	499		chrVII	391747	392360	2.90762	-169
chrIV	319958	320611	2.48853	-165		chrIV	827054	827852	4.44366	-98		chrIV	643545	644154	3.39206	-13		chrIV	1103338	1104066	3.06817	-56		chrIV	621729	622311	2.86846	-92		chrVII	393771	394237	3.04947	18
chrIV	325906	326722	3.62097	-165		chrIV	829149	830252	3.35074	116		chrIV	651511	652550	3.45222	-905		chrIV	1107795	1109007	3.07399	-83		chrIV	625818	626627	2.92779	-225		chrVII	416980	417724	3.37041	-131
chrIV	333584	334001	1.38468	17		chrIV	831359	832662	1.86175	462		chrIV	657103	658493	3.38603	182		chrIV	1110494	1110846	2.91217	81		chrIV	628126	629022	2.83839	-40		chrVII	428441	428887	2.8001	63
chrIV	337038	337773	2.90865	-81		chrIV	838222	838686	3.94939	62		chrIV	664659	665319	3.46333	-79		chrIV	1113751	1114498	2.93773	-98		chrIV	629543	630174	2.92397	-17		chrVII	433936	434425	2.54499	-602
chrIV	339879	340554	3.53992	-83		chrIV	841756	842664	4.20337	-127		chrIV	666518	667954	3.49903	232		chrIV	1116357	1117416	3.14093	-124		chrIV	642851	644035	2.87602	394		chrVII	448260	448744	2.01539	33
chrIV	341056	341880	2.75063	-151		chrIV	844461	845625	3.48345	-182		chrIV	670808	671525	3.40324	-102		chrIV	1124692	1126268	2.86116	178		chrIV	651563	652485	2.86351	-898		chrVII	449655	450261	4.75845	-1
chrIV	344311	345878	2.34279	-142		chrIV	847772	848800	3.62559	215		chrIV	675383	676328	3.32701	-189		chrIV	1127282	1128088	3.1694	-90		chrIV	654906	655301	2.82409	91		chrVII	451652	452809	5	-127
chrIV	351254	351715	2.02726	51		chrIV	850725	851448	3.59771	-88		chrIV	679262	680651	3.38263	-193		chrIV	1129444	1129914	3.20281	91		chrIV	657079	658423	2.93863	229		chrVII	457561	458417	3.97027	-119
chrIV	352194	353043	3.20357	-258		chrIV	855782	856678	4.0104	-87		chrIV	681317	682466	3.43472	-275		chrIV	1135126	1135995	3.05287	-130		chrIV	664355	665287	2.83633	89		chrVII	459268	460184	4.5091	-62
chrIV	357388	359360	3.06484	-1615		chrIV	858919	859622	3.46207	-75		chrIV	683299	684012	3.52107	-75		chrIV	1140634	1141020	3.19386	-341		chrIV	666500	667924	2.88868	208		chrVII	461325	461912	2.98858	-47
chrIV	361091	361582	2.20699	-52		chrIV	861393	862017	3.71404	-349		chrIV	685368	686171	3.52619	-112		chrIV	1145929	1146603	3.18402	-53		chrIV	670959	671549	2.90098	-15		chrVII	499643	500346	2.38092	-89
chrIV	363377	364156	2.38647	-184		chrIV	867154	867738	4.7645	76		chrIV	687554	688398	3.17609	208		chrIV	1149335	1149914	3.20329	-159		chrIV	675327	676365	2.84477	-179		chrVII	505688	506304	2.32918	-74
chrIV	372071	372473	2.47018	24		chrIV	868024	868348	1.73952	-38		chrIV	692888	694544	3.22254	131		chrIV	1150251	1150714	3.19311	37		chrIV	679015	680675	2.80393	-81		chrVII	506563	507170	2.5831	-102
chrIV	373475	374083	2.62253	-171		chrIV	886819	887492	3.53359	-76		chrIV	709120	709768	3.39463	-105		chrIV	1153438	1154099	3.1608	-143		chrIV	681223	682528	2.78814	-259		chrVII	512726	513500	3.07846	-46
chrIV	375027	375621	2.25006	-35		chrIV	889179	890015	1.72788	-154		chrIV	716312	717002	3.52753	-35		chrIV	1168535	1169360	3.19497	-230		chrIV	683219	683995	2.9313	-26		chrVII	514282	514834	2.48788	4
chrIV	376157	376811	4.19659	-4		chrIV	903136	903846	3.84892	-11		chrIV	718221	718842	3.29202	-72		chrIV	1177926	1178734	3.1679	-156		chrIV	685241	686210	2.91624	-83		chrVII	532322	532918	2.86787	-19
chrIV	378120	378795	2.32404	-13		chrIV	906845	907877	4.25449	31		chrIV	727428	728472	3.41293	-309		chrIV	1185838	1186425	2.84167	25		chrIV	687565	688447	2.83794	-221		chrVII	579029	579685	3.0288	-119
chrIV	381184	383174	2.01979	-741		chrIV	917343	917766	2.1972	-16		chrIV	730079	730845	3.49873	-116		chrIV	1195300	1195664	3.17034	-598		chrIV	692560	694517	2.72539	-46		chrVII	605294	606389	1.79028	-294
chrIV	381184	383174	2.01979	-741		chrIV	923364	925096	3.6298	-424		chrIV	733662	734440	3.4526	-87		chrIV	1198511	1199347	3.19225	-232		chrIV	709303	709807	2.90535	6		chrVII	616986	618296	4.89143	20
chrIV	388466	389039	3.43873	148		chrIV	933113	933873	2.67073	-11		chrIV	739727	740350	3.49925	-42		chrIV	1203902	1204682	3.19903	-82		chrIV	716227	717064	2.77098	-24		chrVII	626816	627422	3.56752	-35
chrIV	393614	394509	3.94924	-150		chrIV	935582	936782	3.18378	-290		chrIV	743660	744568	3.50042	-240		chrIV	1206012	1206667	2.9127	43		chrIV	718127	718819	2.88665	-13		chrVII	633859	634625	4.45272	-62
chrIV	396551	397716	2.64458	-403		chrIV	940579	941278	4.17581	-113		chrIV	745769	747024	3.38734	-296		chrIV	1217330	1217778	3.14982	26		chrIV	720227	720838	2.88408	-230		chrVII	635398	636000	3.33593	-13
chrIV	398873	399641	2.6268	-83		chrIV	943059	943795	3.35246	-7		chrIV	751402	751865	3.45317	3		chrIV	1218796	1219612	3.111	-94		chrIV	727453	728566	2.83165	-249		chrVII	639204	639819	4.26394	1
chrIV	403105	403602	3.76921	-63		chrIV	944862	945560	3.00309	-59		chrIV	755291	755805	3.36384	-80		chrIV	1222182	1222946	3.16518	-195		chrIV	730034	730909	2.93162	-106		chrVII	640095	640533	3.05777	57
chrIV	404739	405110	2.61336	32		chrIV	949875	950723	3.2765	-15		chrIV	765095	766014	3.53014	-151		chrIV	1224587	1225085	3.11592	79		chrIV	733677	734453	2.93225	-73		chrVII	641618	642358	3.19004	-22
chrIV	417151	417891	1.80549	-813		chrIV	952616	952944	2.22781	-20		chrIV	771435	772017	3.52913	-151		chrIV	1226235	1227041	3.17188	-102		chrIV	739597	740250	2.93303	73		chrVII	643556	644323	2.90347	-104
chrIV	421569	422711	3.04405	-626		chrIV	959588	960535	2.3958	-260		chrIV	775788	776292	3.44604	-123		chrIV	1229316	1230172	3.09686	-135		chrIV	743592	744639	2.86328	-242		chrVII	646373	647227	3.58389	15
chrIV	423241	424437	3.31346	-329		chrIV	963181	963974	3.88195	166		chrIV	778883	779436	3.50657	117		chrIV	1256652	1256983	3.20566	29		chrIV	745590	747169	2.80233	-279		chrVII	647815	648325	3.2851	72
chrIV	426732	427585	2.97581	-205		chrIV	964586	965353	4.31362	-143		chrIV	780927	781752	3.45468	-83		chrIV	1258324	1258890	3.1341	-89		chrIV	751367	752010	2.83705	58		chrVII	656157	657030	2.64551	-366
chrIV	428409	429265	3.90953	-230		chrIV	977097	978003	2.84816	-321		chrIV	784043	785124	3.52659	-287		chrIV	1263080	1263603	3.20454	18		chrIV	755224	755848	2.95487	-92		chrVII	687433	688164	4.13419	-100
chrIV	431169	432510	3.8124	-323		chrIV	998197	999036	2.94971	-247		chrIV	788985	790489	3.53006	288		chrIV	1267055	1267709	3.08776	-89		chrIV	765110	766044	2.94175	-129		chrVII	689710	690381	2.49256	-199
chrIV	433096	433770	2.50003	-64		chrIV	1001942	1002337	3.30498	-117		chrIV	795157	796034	3.38748	-873		chrIV	1287630	1289035	3.11301	-395		chrIV	769401	770062	2.7908	-199		chrVII	694858	695724	3.55113	-126
chrIV	443992	444912	1.73564	-231		chrIV	1003183	1004315	2.99229	-247		chrIV	802155	802585	3.27737	-148		chrIV	1292361	1293286	3.13835	267		chrIV	771460	772113	2.93626	-90		chrVII	698171	698839	1.86375	-94
chrIV	445827	446452	1.82982	1438		chrIV	1020137	1020918	3.59117	-219		chrIV	803409	804146	3.35972	583		chrIV	1294038	1295011	1.60767	-131		chrIV	775768	776318	2.86511	-120		chrVII	699435	700179	5	-21
chrIV	455135	455536	1.61987	135		chrIV	1024267	1025117	2.79589	63		chrIV	808070	808586	3.50267	4		chrIV	1296686	1297182	3.2098	-248		chrIV	778898	779526	2.85857	169		chrVII	708884	709813	3.77655	1739
chrIV	461582	462491	1.63533	195		chrIV	1029907	1030653	2.87523	-231		chrIV	811401	811783	3.30681	40		chrIV	1298027	1298611	3.07855	-113		chrIV	780832	781779	2.95539	-117		chrVII	718474	719167	5	-72
chrIV	462817	464202	2.29755	76		chrIV	1035265	1036196	3.40816	-156		chrIV	813925	814679	3.2457	-150		chrIV	1300752	1301105	3.20968	-687		chrIV	783912	785135	2.9147	-309		chrVII	719616	720661	3.52905	-270
chrIV	470686	472163	2.39811	-428		chrIV	1036544	1037575	3.13718	-135		chrIV	816374	817074	3.43841	-154		chrIV	1317550	1318092	3.10793	-48		chrIV	788881	790490	2.8964	237		chrVII	729314	730148	5	-60
chrIV	472765	474291	2.8515	371		chrIV	1039268	1039984	2.58656	-102		chrIV	818880	819587	3.49271	-38		chrIV	1319029	1320339	3.15975	157		chrIV	795254	795998	2.87981	-903		chrVII	737922	738522	2.41265	-19
chrIV	494118	494773	3.0463	-178		chrIV	1044916	1045279	1.54649	-87		chrIV	820663	821490	3.46395	-218		chrIV	1324964	1325502	3.07556	68		chrIV	802088	802587	2.92374	-116		chrVII	749794	750632	3.3189	-122
chrIV	497164	497762	2.96823	-145		chrIV	1054716	1055922	3.24937	107		chrIV	827086	827857	3.48818	-110		chrIV	1330961	1331441	3.14375	-36		chrIV	803359	804126	2.86412	548		chrVII	767290	767765	2.75794	99
chrIV	501199	502023	1.83378	511		chrIV	1058779	1059948	4.003	-263		chrIV	831279	832750	3.25616	458		chrIV	1333653	1334721	3.19982	-218		chrIV	808095	808649	2.64845	48		chrVII	770009	770820	2.54739	-154
chrIV	502973	503724	2.78662	-76		chrIV	1062583	1063670	4.51203	-225		chrIV	838204	838638	3.34994	29		chrIV	1339297	1339873	3.05382	-91		chrIV	811398	811775	2.87305	45		chrVII	781154	782081	3.52303	-149
chrIV	504560	505295	2.38956	-233		chrIV	1067345	1068226	3.68796	55		chrIV	841726	842620	3.52173	-164		chrIV	1341843	1342731	3.17803	-206		chrIV	813914	815033	2.87072	22		chrVII	786632	787187	4.31272	10
chrIV	524455	525166	2.84316	-98		chrIV	1071159	1073638	3.64323	158		chrIV	844602	845664	3.51114	-272		chrIV	1349728	1350612	2.9776	-120		chrIV	816245	817109	2.84528	-201		chrVII	792781	793458	3.33978	-67
chrIV	530266	531529	3.18316	-201		chrIV	1071159	1073638	3.64323	158		chrIV	847743	848704	3.45364	153		chrIV	1353288	1353787	3.21066	-187		chrIV	818910	819661	2.91857	-90		chrVII	799983	800661	3.18373	-224
chrIV	534169	535628	2.68651	-317		chrIV	1074926	1075324	3.77712	46		chrIV	850775	851473	3.21859	-104		chrIV	1358612	1359354	3.13168	-81		chrIV	820794	821559	2.89601	-118		chrVII	805695	806714	4.54721	-184
chrIV	539251	540076	3.31254	-139		chrIV	1075676	1076253	3.16846	100		chrIV	853733	854385	3.37643	-87		chrIV	1362630	1362936	2.96233	-95		chrIV	827007	827918	2.90962	-108		chrVII	827309	827767	2.95925	-14
chrIV	544945	546953	1.49109	-693		chrIV	1078138	1078860	3.77378	-50		chrIV	855851	856606	3.43108	-88		chrIV	1369323	1369948	3.1386	-154		chrIV	829116	830424	2.84235	185		chrVII	830195	830701	3.35335	-67
chrIV	548094	548601	3.21776	-38		chrIV	1084205	1085419	3.86498	-253		chrIV	857778	858365	3.16836	-65		chrIV	1383229	1383892	3.12086	-118		chrIV	836269	836621	2.85357	24		chrVII	832144	832748	3.49529	-10
chrIV	552887	553519	2.73028	-51		chrIV	1087352	1087936	4.25657	63		chrIV	858947	859600	3.41373	-72		chrIV	1385434	1387132	1.82326	210		chrIV	838226	838678	2.91753	60		chrVII	836969	837364	2.57852	25
chrIV	557823	558336	2.87025	-20		chrIV	1092383	1092880	1.98599	-121		chrIV	861366	862043	3.4411	-349		chrIV	1394248	1395298	3.02573	-199		chrIV	841629	842733	2.90896	-156		chrVII	843346	844169	3.5391	-96
chrIV	560444	561087	3.06635	-141		chrIV	1093360	1093957	2.93452	-73		chrIV	867197	867779	3.10562	34		chrIV	1398617	1399278	3.18602	-67		chrIV	844496	845305	2.91476	-40		chrVII	854661	855070	1.76834	29
chrIV	565433	566199	2.95314	-111		chrIV	1103235	1104191	3.09386	-45		chrIV	886809	887434	3.40716	-110		chrIV	1401005	1401380	3.14125	21		chrIV	847705	848705	2.8724	134		chrVII	867114	868079	5	-77
chrIV	569523	570926	2.84923	-424		chrIV	1107734	1108993	3.9603	-120		chrIV	889105	889839	3.4328	-279		chrIV	1405654	1406294	3.03082	-120		chrIV	850723	851570	2.95082	-81		chrVII	891945	892405	2.45783	11
chrIV	573665	574375	1.59976	-144		chrIV	1110485	1110888	3.18754	98		chrIV	903230	905166	3.48618	-718		chrIV	1411830	1412304	3.17026	-306		chrIV	853727	854225	2.87261	-4		chrVII	897279	897681	2.35617	-22
chrIV	582277	582801	2.15325	-41		chrIV	1113650	1114438	4.64177	-17		chrIV	906853	907640	3.45821	46		chrIV	1422604	1422996	3.14724	37		chrIV	855816	856651	2.93565	-83		chrVII	921602	922451	3.6227	-148
chrIV	583250	583920	2.43074	-120		chrIV	1116343	1117458	4.37216	-138		chrIV	917243	917748	3.2671	-75		chrIV	1427004	1427500	3.1803	-45		chrIV	858987	859630	2.91171	-37		chrVII	924227	924933	2.75583	-116
chrIV	587552	588545	1.52646	-330		chrIV	1124750	1126226	4.52681	186		chrIV	923635	924928	3.41418	-476		chrIV	1430612	1431250	3.18376	-81		chrIV	861387	862146	2.9209	-287		chrVII	936551	937327	4.36148	-56
chrIV	596799	597246	2.80526	-133		chrIV	1127287	1128150	3.91071	-124		chrIV	933124	933731	3.29847	-76		chrIV	1433585	1434518	3.16638	216		chrIV	866973	867760	2.83213	155		chrVII	939749	940164	2.81701	34
chrIV	598112	598683	2.42996	-70		chrIV	1129438	1129966	4.10258	114		chrIV	935630	936753	3.48251	-300		chrIV	1435912	1437213	3.06079	346		chrIV	886975	887529	2.8132	20		chrVII	944507	944996	2.15276	-393
chrIV	609856	610655	4.32031	-175		chrIV	1130901	1131552	2.59484	226		chrIV	940581	941317	3.45858	-133		chrIV	1443088	1443602	3.15028	58		chrIV	889178	890063	2.89536	-130		chrVII	947171	947571	3.41031	-49
chrIV	611687	613052	1.75882	297		chrIV	1135152	1135997	4.47069	-144		chrIV	943126	943825	3.46938	-56		chrIV	1446710	1447206	3.05911	36		chrIV	902872	904652	2.79002	-282		chrVII	953154	954283	3.61043	-239
chrIV	613785	614501	2.77038	-139		chrIV	1140438	1141045	2.99121	-426		chrIV	944877	945595	3.38538	-84		chrIV	1447633	1448108	2.84632	41		chrIV	906814	907963	2.95454	59		chrVII	961848	962719	2.66509	-223
chrIV	621810	622278	2.76684	-68		chrIV	1149222	1150639	3.3516	-465		chrIV	949985	950735	3.49247	-76		chrIV	1472743	1473247	3.20703	4		chrIV	917285	917758	2.83937	-49		chrVII	981842	982538	2.93858	-122
chrIV	625833	626588	2.93155	-213		chrIV	1153439	1154104	3.09789	-146		chrIV	959598	960438	3.30528	-216		chrIV	1479920	1480722	3.19208	-104		chrIV	923556	925097	2.95492	-458		chrVII	983864	984975	2.91173	-148
chrIV	628221	629060	4.19881	-107		chrIV	1157430	1157841	2.3732	-1708		chrIV	963192	963749	3.51757	59		chrIV	1483114	1484070	3.06186	-189		chrIV	933244	933875	2.91423	56		chrVII	995224	995902	3.56132	-76
chrIV	629446	630118	3.27146	-94		chrIV	1168542	1169447	4.11934	-183		chrIV	964532	965364	3.48626	-165		chrIV	1492827	1493680	3.12894	-1332		chrIV	935558	936756	2.88731	-265		chrVII	996229	997110	2.3967	-199
chrIV	630902	631203	1.63379	-229		chrIV	1173893	1175743	4.20045	-642		chrIV	967726	968432	3.13318	-257		chrIV	1509455	1509959	3.12713	-1195		chrIV	940524	941336	2.84841	-114		chrVII	1007141	1007632	3.21446	-82
chrIV	644772	645059	1.54248	119		chrIV	1177965	1178723	3.9695	-170		chrIV	998203	999020	3.39564	-252		chrIV	1514178	1515341	3.03229	2666		chrIV	943047	943793	2.94892	0		chrVII	1010426	1010900	2.07022	103
chrIV	651525	652545	3.85942	-909		chrIV	1185861	1186466	4.86167	57		chrIV	1001918	1002420	3.53561	-146		chrIV	1516185	1516729	3.17824	1218		chrIV	944855	945584	2.78144	-68		chrVII	1016499	1017073	2.6322	-36
chrIV	654894	655299	2.26138	84		chrIV	1195114	1195627	2.18891	-487		chrIV	1003290	1004237	3.46351	-240		chrIV	1520588	1521399	3.09324	-296		chrIV	949614	950734	2.92402	110		chrVII	1042812	1043531	4.06594	-77
chrIV	657093	658512	4.05453	177		chrIV	1196136	1196921	2.65228	-266		chrIV	1017330	1019579	3.41596	-913		chrIV	1528240	1528887	2.5959	2243		chrIV	952574	953006	2.87717	-10		chrVII	1046252	1046993	3.4141	-62
chrIV	664675	665337	2.78947	-96		chrIV	1198423	1199366	3.47112	-198		chrIV	1020118	1020946	3.49381	-215		chrV	3200	3981	3.19111	506		chrIV	959615	960460	2.83884	-236		chrVII	1051423	1052048	3.97255	-11
chrIV	666554	667945	3.10911	246		chrIV	1203888	1204596	3.32885	-32		chrIV	1021967	1023107	3.46013	-216		chrV	19632	20480	2.92233	467		chrIV	963203	963807	2.9472	93		chrVII	1059858	1060288	2.2788	-33
chrIV	670824	671511	2.56936	-101		chrIV	1206123	1206660	4.43487	-9		chrIV	1024489	1025097	3.32568	-38		chrV	20760	21898	3.10948	1740		chrIV	964528	965379	2.87436	-159		chrVII	1062775	1063275	3.30771	128
chrIV	675400	676327	3.66466	-197		chrIV	1212723	1214099	1.92819	-493		chrIV	1029991	1030636	3.43482	-265		chrV	25623	27594	3.20986	-58		chrIV	971120	971571	2.88551	128		chrVII	1077908	1078917	2.95097	1814
chrIV	679252	680661	2.54904	-193		chrIV	1217128	1217826	2.73317	103		chrIV	1035339	1036142	3.44891	-166		chrV	30822	31406	3.2136	125		chrIV	980198	980970	2.86897	-878		chrVII	1087155	1087746	3.6042	1994
chrIV	681307	682463	4.26408	-268		chrIV	1218791	1219778	3.64739	-128		chrIV	1036765	1037386	3.23478	-119		chrV	39276	39831	3.20818	-17		chrIV	998246	999033	2.86595	-224		chrVIII	3049	3598	2.3832	-13
chrIV	683288	683992	3.56982	-59		chrIV	1222197	1222947	3.98992	-187		chrIV	1039252	1039981	3.34436	-108		chrV	43085	43482	3.05367	32		chrIV	1001863	1002391	2.95343	-104		chrVIII	10571	11511	3.40084	-828
chrIV	685374	686144	3.62552	-116		chrIV	1224589	1225114	4.61584	95		chrIV	1044926	1045280	3.04316	-92		chrV	46953	47387	3.11542	2		chrIV	1003242	1004320	2.94637	-223		chrVIII	25222	25718	3.77443	39
chrIV	687577	688394	1.63225	218		chrIV	1226180	1227095	3.14509	-102		chrIV	1058816	1059959	3.45402	-239		chrV	51312	52145	3.19162	-190		chrIV	1018338	1019512	2.85697	-443		chrVIII	62279	62830	4.69897	8
chrIV	692764	694522	4.92891	58		chrIV	1229318	1230437	4.35978	-269		chrIV	1062566	1063611	3.51625	-263		chrV	55869	56736	3.18929	-201		chrIV	1020202	1020980	2.85753	-156		chrVIII	69365	70529	3.08464	239
chrIV	702431	704579	1.67871	271		chrIV	1240090	1240798	3.05288	232		chrIV	1067328	1068012	3.52471	-61		chrV	57991	58693	2.89951	-36		chrIV	1024379	1025042	2.88934	44		chrVIII	101774	102862	2.37866	-294
chrIV	709120	709783	2.54391	-97		chrIV	1256583	1256959	3.41731	76		chrIV	1071277	1071869	3.4837	-187		chrV	60657	61296	3.20885	-126		chrIV	1029885	1030621	2.94939	-204		chrVIII	143252	144218	3.98666	-177
chrIV	716308	717025	3.8622	-45		chrIV	1257941	1258997	4.00854	-227		chrIV	1074989	1075341	3.38905	6		chrV	64893	65530	3.17455	-45		chrIV	1035282	1036194	2.8399	-163		chrVIII	158925	159807	4.00369	-72
chrIV	718193	718835	1.81357	-54		chrIV	1263100	1263554	3.41399	3		chrIV	1075694	1076167	3.34312	66		chrV	70243	70771	3.09864	29		chrIV	1036801	1037469	2.93065	-60		chrVIII	160345	161102	4.97759	-120
chrIV	730070	730821	2.67246	-132		chrIV	1267029	1267697	3.69361	-108		chrIV	1078163	1079229	3.48267	-247		chrV	73532	73883	3.12275	-63		chrIV	1039224	1040007	2.93929	-107		chrVIII	179871	180620	3.16066	-99
chrIV	733682	734410	2.68091	-92		chrIV	1287614	1288997	4.05602	-368		chrIV	1084317	1085370	3.34047	-221		chrV	75429	76095	3.07961	-182		chrIV	1044845	1045283	2.76668	-53		chrVIII	187484	188287	4.16753	-38
chrIV	739710	740366	3.34664	-41		chrIV	1292340	1293272	3.2647	285		chrIV	1087334	1087887	3.37488	30		chrV	80193	80774	3.17629	22		chrIV	1052106	1052629	2.80485	-140		chrVIII	212471	213142	5	-87
chrIV	741470	742283	2.0873	-277		chrIV	1294113	1294982	5	-145		chrIV	1093389	1093948	2.80207	-83		chrV	84400	84811	3.19738	-54		chrIV	1054664	1055944	2.94586	92		chrVIII	214525	215146	5	-118
chrIV	743658	744559	3.7034	-235		chrIV	1296641	1297200	1.83179	-235		chrIV	1103266	1104043	3.51178	-103		chrV	89761	90484	3.19468	-135		chrIV	1059273	1060077	2.86707	48		chrVIII	220578	221009	2.63887	69
chrIV	745707	747006	4.72825	-256		chrIV	1297989	1298741	3.12107	-67		chrIV	1107911	1108997	3.51829	-30		chrV	97538	98247	3.18754	-97		chrIV	1062561	1063946	2.84435	-98		chrVIII	223420	224021	4.80901	37
chrIV	751221	751905	1.3126	-68		chrIV	1302882	1303617	2.83137	76		chrIV	1110449	1110827	3.45127	49		chrV	99177	99746	3.17364	794		chrIV	1067217	1068141	2.95061	-52		chrVIII	226847	227308	3.45045	63
chrIV	754990	755800	2.40433	-233		chrIV	1317523	1318185	4.22221	-81		chrIV	1113756	1114457	3.4001	-80		chrV	110889	111712	2.92427	-120		chrIV	1071036	1071865	2.9349	-65		chrVIII	228732	229638	3.76596	-148
chrIV	765075	766006	2.68372	-165		chrIV	1318972	1320333	3.61647	188		chrIV	1116358	1117443	3.51505	-138		chrV	115673	116323	3.20048	-169		chrIV	1074929	1076209	2.72309	-296		chrVIII	234274	235162	3.53711	-60
chrIV	769421	769733	1.41462	52		chrIV	1323647	1324382	2.63528	224		chrIV	1124759	1125425	3.20697	-167		chrV	118082	118440	3.08304	-881		chrIV	1074929	1076209	2.72309	-296		chrVIII	246006	246454	3.03502	37
chrIV	771427	772017	3.16127	-155		chrIV	1324983	1325656	4.23107	-19		chrIV	1125708	1126245	3.5327	41		chrV	120049	120771	3.19592	-111		chrIV	1078123	1079209	2.90564	-217		chrVIII	255523	256511	3.4389	-261
chrIV	775764	776289	3.50915	-136		chrIV	1330986	1331458	3.95392	-15		chrIV	1127344	1128089	3.46565	-122		chrV	121024	121723	3.18847	-73		chrIV	1084031	1085438	2.94366	-330		chrVIII	272337	272900	3.74287	-8
chrIV	778898	779477	3.78934	145		chrIV	1333579	1335224	3.38105	-419		chrIV	1129439	1129914	3.4325	89		chrV	123541	123908	3.18304	68		chrIV	1087340	1087981	2.91225	80		chrVIII	273741	274129	2.25075	-239
chrIV	780922	781741	2.8828	-91		chrIV	1339174	1339940	2.71423	-119		chrIV	1135170	1135971	3.42431	-140		chrV	126120	126939	3.04357	-99		chrIV	1088267	1088934	2.7406	1020		chrVIII	277528	278225	3.23701	-276
chrIV	784042	785105	3.15482	-297		chrIV	1341720	1342775	3.17519	-245		chrIV	1140433	1141028	3.25371	-437		chrV	128143	128878	3.19646	97		chrIV	1092329	1092846	2.81491	-77		chrVIII	281067	281843	2.85735	-40
chrIV	788979	790482	3.55354	282		chrIV	1349679	1350614	2.63372	-143		chrIV	1144924	1145464	3.32123	102		chrV	156222	157157	3.01177	-113		chrIV	1093354	1094052	2.87312	-60		chrVIII	283044	283470	2.73918	41
chrIV	795187	796005	2.55194	-873		chrIV	1353107	1353859	4.11746	-242		chrIV	1145861	1146596	3.51135	-90		chrV	162284	163124	2.97178	-19		chrIV	1103280	1104193	2.76009	-21		chrVIII	284256	284903	4.25835	45
chrIV	802144	802586	2.3257	-143		chrIV	1355964	1356325	2.36176	80		chrIV	1149284	1149961	3.42674	-157		chrV	166391	168071	3.16602	-346		chrIV	1107806	1109060	2.8515	-51		chrVIII	314368	315112	2.20605	-67
chrIV	803374	804176	2.4809	580		chrIV	1358618	1359394	3.9458	-104		chrIV	1150264	1150694	3.45524	41		chrV	171568	172415	3.13827	-123		chrIV	1110447	1110907	2.90357	88		chrVIII	315732	316725	4.68091	-261
chrIV	807961	808589	3.14598	-49		chrIV	1362648	1362972	2.55133	-68		chrIV	1153413	1154123	3.52456	-142		chrV	178565	179091	3.01242	-13		chrIV	1116279	1117509	2.9342	-131		chrVIII	327839	328615	4.34345	-76
chrIV	811411	811773	2.39111	40		chrIV	1365184	1367788	4.52851	341		chrIV	1157182	1157884	3.45738	-1605		chrV	182387	182960	3.20709	74		chrIV	1124636	1126265	2.80354	149		chrVIII	340889	342635	2.38772	97
chrIV	813928	814686	2.81767	-145		chrIV	1369328	1369944	3.49394	-154		chrIV	1159006	1159723	3.35249	1955		chrV	184233	184781	3.21028	-34		chrIV	1127269	1128121	2.8936	-100		chrVIII	345234	346198	4.22545	-88
chrIV	816350	817063	2.44775	-171		chrIV	1381763	1382465	2.77967	-68		chrIV	1168540	1169342	3.48873	-237		chrV	187064	188582	3.15467	-454		chrIV	1129434	1129952	2.88862	105		chrVIII	349393	349993	2.19584	119
chrIV	817588	818030	1.55054	-141		chrIV	1382907	1383969	3.54856	5		chrIV	1173976	1175817	3.51156	-721		chrV	192304	193050	3.2078	-53		chrIV	1135095	1135648	2.90842	59		chrVIII	360516	361167	2.03615	-71
chrIV	818875	819607	2.72265	-45		chrIV	1385110	1387124	4.26396	44		chrIV	1177949	1178744	3.40551	-173		chrV	200823	201384	3.16826	28		chrIV	1140661	1141073	2.88283	-301		chrVIII	363944	364708	3.64514	-173
chrIV	820660	821480	3.22031	-225		chrIV	1394231	1395310	4.74584	-197		chrIV	1185833	1186429	3.32587	24		chrV	204839	205509	2.99291	-77		chrIV	1145882	1146687	2.86549	-34		chrVIII	374030	374937	5	-174
chrIV	827084	827846	3.53889	-110		chrIV	1398498	1399387	4.10817	-72		chrIV	1195272	1195684	3.37713	-594		chrV	210080	210667	3.14575	-142		chrIV	1149291	1150720	2.82881	514		chrVIII	380976	381658	3.18584	745
chrIV	829140	830550	3.35617	260		chrIV	1400979	1401383	3.31739	33		chrIV	1198478	1199330	3.53303	-207		chrV	212968	213576	3.18641	-95		chrIV	1149291	1150720	2.82881	514		chrVIII	386743	387567	5	-78
chrIV	831286	832686	2.63033	-473		chrIV	1405509	1406354	3.4883	-78		chrIV	1203929	1204673	3.49505	-91		chrV	214511	215270	3.17518	-144		chrIV	1153424	1154112	2.94306	-142		chrVIII	393021	393873	4.61029	-87
chrIV	838218	838653	3.17418	44		chrIV	1410534	1412343	2.93214	-312		chrIV	1206097	1206700	3.17117	-16		chrV	228043	228830	3.18078	-14		chrIV	1168544	1169359	2.94098	-226		chrVIII	397044	397639	3.47784	91
chrIV	841728	842620	3.82475	-163		chrIV	1414445	1414895	3.02798	95		chrIV	1217339	1217848	3.32739	-14		chrV	229213	230011	3.07775	-131		chrIV	1173877	1175765	2.77955	-645		chrVIII	406611	407363	3.01199	-116
chrIV	844602	845655	3.7612	-268		chrIV	1416593	1417541	2.94738	-193		chrIV	1218788	1219631	3.44418	-100		chrV	232289	232650	3.15809	9		chrIV	1177921	1178810	2.88016	-192		chrVIII	417012	417834	3.79129	-126
chrIV	847757	848709	2.61406	162		chrIV	1422613	1423143	3.26198	115		chrIV	1222174	1222940	3.45876	-202		chrV	246381	246858	3.20419	-117		chrIV	1185789	1186571	2.71036	73		chrVIII	438842	439666	4.1426	-88
chrIV	850773	851450	2.95841	-113		chrIV	1426942	1428234	3.3948	-381		chrIV	1224590	1225072	3.51668	74		chrV	254195	254985	2.99083	-66		chrIV	1188802	1190305	2.70626	13		chrVIII	443192	444125	3.65715	-169
chrIV	853730	854439	2.19559	-90		chrIV	1430525	1431276	3.40233	-111		chrIV	1226254	1227041	3.37007	-112		chrV	291464	291970	3.04655	-349		chrIV	1195056	1195680	2.88518	-484		chrVIII	480442	481256	3.82931	-141
chrIV	855845	856605	3.37818	-92		chrIV	1433575	1434457	2.39809	252		chrIV	1229345	1230246	3.53294	-187		chrV	301126	301690	3.18866	919		chrIV	1196031	1196984	2.8713	-245		chrVIII	483515	484856	2.94889	158
chrIV	857760	858358	1.99939	-78		chrIV	1436024	1437229	4.57275	-303		chrIV	1239289	1239701	3.33502	3		chrV	307284	307843	3.0588	-89		chrIV	1198432	1199875	2.78394	-29		chrVIII	486348	487044	3.89908	-65
chrIV	858958	859575	2.8695	-79		chrIV	1446747	1447188	4.00115	26		chrIV	1240390	1240949	3.38486	6		chrV	313302	314389	3.15005	-348		chrIV	1203851	1204741	2.71232	-86		chrVIII	487948	488934	4.46818	-205
chrIV	861360	862053	2.81107	-347		chrIV	1447605	1448111	2.50176	28		chrIV	1256592	1256992	3.47095	55		chrV	325597	326296	3.20434	-11		chrIV	1205580	1206682	2.78261	252		chrVIII	491628	492264	5	15
chrIV	867202	867760	4.82483	41		chrIV	1461162	1461707	3.71735	119		chrIV	1258009	1258931	3.50757	-226		chrV	326647	327469	2.96667	-7		chrIV	1212700	1213131	2.64422	68		chrVIII	502208	502759	2.09144	96
chrIV	870716	871288	1.80416	-72		chrIV	1472746	1473358	3.32003	-53		chrIV	1263093	1263596	3.45608	21		chrV	327860	328785	3.14637	-154		chrIV	1217177	1217821	2.86919	81		chrVIII	516271	516820	2.54979	-61
chrIV	877765	878285	2.40045	5902		chrIV	1475824	1477441	2.5174	-157		chrIV	1267016	1267741	3.46404	-92		chrV	332475	333120	3.00886	32		chrIV	1218775	1219721	2.94841	-138		chrVIII	522705	523335	3.57574	-1283
chrIV	884626	884947	1.8377	60		chrIV	1479840	1480800	3.59608	-105		chrIV	1278918	1279957	3.37837	228		chrV	347374	348356	3.14326	-253		chrIV	1222157	1222999	2.89295	-181		chrVIII	543203	543598	2.14765	393
chrIV	889083	890019	3.14678	-200		chrIV	1483136	1484123	3.85652	-227		chrIV	1292009	1293320	3.43179	426		chrV	353356	354069	3.18965	-1427		chrIV	1224588	1225115	2.66627	95		chrVIII	558590	559371	3.46996	-951
chrIV	906866	907659	3.45775	30		chrIV	1492814	1493947	3.76035	-1205		chrIV	1294102	1294982	3.37126	-148		chrV	358715	359686	3.02879	-140		chrIV	1226220	1227004	2.87232	-76		chrIX	3622	4271	3.97486	2200
chrIV	917201	917739	2.35557	-101		chrIV	1506461	1507279	2.071	492		chrIV	1295510	1296118	3.28981	-403		chrV	361526	362342	3.20404	-140		chrIV	1229332	1230338	2.92298	-226		chrIX	32724	33117	2.09926	-355
chrIV	923617	924964	3.37721	-485		chrIV	1509226	1510282	2.76846	-1148		chrIV	1297975	1298608	3.02412	-131		chrV	366599	367319	3.18291	157		chrIV	1240341	1240853	2.851	79		chrIX	37287	37817	2.78536	167
chrIV	933107	933769	2.40822	-66		chrIV	1513926	1516872	3.20256	2276		chrIV	1302347	1303481	3.3161	-260		chrV	371727	372242	3.09876	28		chrIV	1256564	1257001	2.95328	64		chrIX	47313	48399	3.43313	166
chrIV	935637	936736	2.66683	-295		chrIV	1528219	1529064	5	2321		chrIV	1317572	1318127	3.53511	-77		chrV	374324	374928	2.96909	-81		chrIV	1258050	1258956	2.72348	-193		chrIX	54711	55554	3.00561	-65
chrIV	940579	941357	3.37049	-152		chrV	2837	4047	3.16555	655		chrIV	1319014	1320267	3.44575	200		chrV	377418	378559	2.96202	-375		chrIV	1261200	1261865	2.91712	-148		chrIX	60473	61163	5	-124
chrIV	943141	943826	2.91308	-64		chrV	19570	22196	4.08561	1294		chrIV	1321820	1322390	3.22138	-99		chrV	381843	382380	3.19248	-9		chrIV	1263089	1263941	2.88297	191		chrIX	67951	68335	2.19331	-76
chrIV	944880	945581	2.60492	-79		chrV	25553	28107	3.99555	-54		chrIV	1324989	1325566	3.4769	23		chrV	387044	387449	3.18722	15		chrIV	1266999	1267716	2.95481	-113		chrIX	73366	73818	2.28821	-139
chrIV	945929	946253	1.42725	-716		chrV	30706	31382	3.38884	195		chrIV	1328313	1328698	3.25214	-36		chrV	393747	394198	3.17894	-261		chrIV	1272270	1272783	2.88045	304		chrIX	76946	77536	2.57618	42
chrIV	949855	950754	2.79948	-21		chrV	33965	34685	2.74882	-82		chrIV	1330922	1331408	3.37111	-72		chrV	394917	395494	3.14677	-339		chrIV	1275225	1277873	2.91805	620		chrIX	82766	83691	3.519	-73
chrIV	952383	952991	2.43772	-113		chrV	39218	39797	3.61977	29		chrIV	1333663	1334757	3.36738	-241		chrV	395942	396369	3.15533	16		chrIV	1287502	1289018	2.93146	-322		chrIX	96157	96618	3.70195	-13
chrIV	959581	960497	2.75766	-237		chrV	43064	43585	2.73746	73		chrIV	1339150	1339846	3.25055	-178		chrV	398961	399633	3.21053	-242		chrIV	1289291	1289607	2.84698	43		chrIX	97190	97966	3.09087	183
chrIV	963148	963746	3.09517	35		chrV	46914	47441	3.88278	10		chrIV	1341849	1342698	3.43761	-219		chrV	400549	401430	3.1459	-145		chrIV	1292365	1293356	2.92634	230		chrIX	101995	102524	3.17532	-25
chrIV	964587	965345	3.89262	-147		chrV	51200	52171	3.70663	-147		chrIV	1349739	1350571	3.36353	-135		chrV	404029	404911	3.00133	-118		chrIV	1294060	1295035	2.76733	-145		chrIX	112994	114017	3.44851	-269
chrIV	967723	968588	2.19939	-334		chrV	55733	56836	3.82049	-183		chrIV	1353179	1354005	3.51526	-133		chrV	409134	409990	3.003	-499		chrIV	1295499	1296140	2.85067	-409		chrIX	117340	118253	4.90363	-153
chrIV	971174	971543	2.44234	115		chrV	60567	61237	3.272	-51		chrIV	1358613	1359451	3.50593	-130		chrV	413938	414871	3.01519	-76		chrIV	1297993	1298772	2.79233	-49		chrIX	148446	149277	5	-153
chrIV	978901	979794	1.93365	-139		chrV	63019	64092	3.14412	-172		chrIV	1365184	1367752	3.52166	359		chrV	415457	416990	3.1961	365		chrIV	1300755	1301071	2.83048	-703		chrIX	155693	156360	3.20832	-18
chrIV	980033	982135	2.46321	-378		chrV	64899	65632	3.22034	-99		chrIV	1369332	1369947	3.42058	-150		chrV	431923	432548	3.2127	-259		chrIV	1302848	1303491	2.87846	-4		chrIX	169385	170163	2.73712	-133
chrIV	998215	999013	2.76472	-250		chrV	69989	70766	4.50883	-100		chrIV	1381844	1382509	3.33904	-131		chrV	462456	462777	3.16689	32		chrIV	1317511	1318121	2.95424	-43		chrIX	173369	174117	2.59656	-151
chrIV	1001925	1002378	3.18643	-129		chrV	75453	76211	1.45478	-112		chrIV	1383133	1383936	3.53311	-92		chrV	464557	465235	3.14582	-54		chrIV	1318981	1320335	2.94026	183		chrIX	179925	180616	3.85164	-32
chrIV	1003275	1004287	2.49617	-223		chrV	79808	81008	4.00947	-54		chrIV	1385004	1387092	3.34541	-25		chrV	467236	467660	3.16983	22		chrIV	1322048	1322423	2.88059	31		chrIX	188525	189282	3.89046	-120
chrIV	1005152	1005746	1.91412	-226		chrV	82531	83219	2.71718	-272		chrIV	1394244	1395265	3.36646	-181		chrV	472190	472662	3.20891	-2		chrIV	1323928	1324430	2.72948	60		chrIX	192878	193742	4.22818	-115
chrIV	1010984	1011443	1.969	746		chrV	84426	84757	2.80388	-40		chrIV	1398552	1399288	3.29963	-95		chrV	473775	475304	3.08291	265		chrIV	1324716	1325581	2.80125	152		chrIX	203035	203424	2.67371	29
chrIV	1020112	1020934	3.68523	-224		chrV	89737	90487	3.63234	-146		chrIV	1400980	1401409	3.51064	19		chrV	482703	483525	3.10106	-266		chrIV	1328223	1328674	2.88764	21		chrIX	206991	207947	5	1834
chrIV	1021955	1023104	3.27775	-209		chrV	110865	111684	4.20829	-146		chrIV	1405599	1406365	3.35382	-128		chrV	484109	485014	3.21477	-221		chrIV	1330943	1331616	2.8879	43		chrIX	211659	212751	5	-200
chrIV	1024465	1025104	2.1726	-30		chrV	115668	116361	3.33681	-152		chrIV	1411097	1412326	3.37214	-585		chrV	500148	500830	3.12472	-141		chrIV	1333549	1334752	2.74361	-182		chrIX	215782	216817	2.37412	-347
chrIV	1029964	1030603	2.78519	-235		chrV	123556	123960	3.31029	101		chrIV	1414406	1414899	3.43681	78		chrV	502623	503200	3.02476	-18		chrIV	1339193	1339972	2.87939	-93		chrIX	237469	237984	3.38754	33
chrIV	1035309	1036157	2.78733	-158		chrV	126073	126911	4.62166	-137		chrIV	1416648	1417479	3.33539	-190		chrV	522242	523311	1.61395	-108		chrIV	1341723	1343009	2.91237	-127		chrIX	259981	260469	2.89721	67
chrIV	1036783	1037405	2.62538	-101		chrV	128142	128893	2.31107	90		chrIV	1422574	1422993	3.33958	21		chrV	526496	527452	3.05272	-108		chrIV	1353138	1353916	2.94252	-198		chrIX	275991	276832	4.14818	-113
chrIV	1039265	1039958	2.83483	-103		chrV	136569	137763	2.2665	-388		chrIV	1430537	1431270	3.33242	-108		chrV	535795	536664	3.09242	-70		chrIV	1358511	1359374	2.911	-41		chrIX	282589	283368	3.96347	-327
chrIV	1044943	1045245	2.17642	-83		chrV	147700	148455	2.78511	-98		chrIV	1433645	1434479	3.47165	206		chrV	541243	541903	3.18441	-117		chrIV	1365179	1367882	2.86617	296		chrIX	288708	289478	5	-185
chrIV	1054666	1055922	2.74357	82		chrV	149777	151953	3.85737	113		chrIV	1435806	1437172	3.49699	272		chrV	550885	551267	3.20974	46		chrIV	1369366	1369967	2.86149	-123		chrIX	289815	290464	2.66294	-51
chrIV	1056318	1056746	2.02831	-19		chrV	156186	157065	4.38725	-177		chrIV	1443103	1443560	3.38171	71		chrV	552231	552802	3.14739	-8		chrIV	1381727	1382427	2.91788	-31		chrIX	299756	300233	1.44223	14
chrIV	1058776	1059994	4.26944	-242		chrV	158818	159867	3.32619	-225		chrIV	1446752	1447260	3.50359	-12		chrV	553739	554316	2.99819	-59		chrIV	1383035	1383943	2.94851	-46		chrIX	303781	304456	3.88835	-15
chrIV	1062564	1063600	3.92037	-270		chrV	162173	163103	4.03547	-85		chrIV	1447530	1448097	3.33205	-16		chrV	558978	559794	3.13933	-68		chrIV	1385105	1387096	2.59997	28		chrIX	310105	310627	3.68362	60
chrIV	1067345	1068009	3.28778	-54		chrV	166430	167051	3.21097	144		chrIV	1461292	1461720	3.45617	48		chrV	560238	561364	3.11432	1347		chrIV	1394015	1395363	2.86883	-115		chrIX	312600	313198	4.67232	-6
chrIV	1071298	1071873	3.08755	-200		chrV	167424	168047	2.65539	-851		chrIV	1472747	1473358	3.5095	-54		chrV	562441	563288	3.09372	-240		chrIV	1398549	1399426	2.84571	-27		chrIX	314536	315434	3.42168	-108
chrIV	1073207	1073734	1.98384	17		chrV	171404	172453	3.46371	-111		chrIV	1476168	1477387	3.38656	-302		chrV	570668	570944	3.02116	-349		chrIV	1400955	1401405	2.95147	34		chrIX	320724	321795	5	-194
chrIV	1075000	1075336	2.41211	3		chrV	172761	173690	3.06246	112		chrIV	1478216	1478886	3.41507	-57		chrV	573045	573697	3.05649	1891		chrIV	1405594	1406383	2.88927	-135		chrIX	343488	344391	4.00875	-122
chrIV	1075678	1076193	2.67668	71		chrV	174509	176071	3.93064	42		chrIV	1479870	1480691	3.46413	-144		chrVI	2287	3153	3.01582	-105		chrIV	1411895	1412355	2.86031	-248		chrIX	349857	350578	3.84354	-83
chrIV	1078142	1079258	3.09287	-251		chrV	178516	179092	3.92887	-37		chrIV	1483181	1484056	3.47309	-216		chrVI	10143	11781	3.20459	7		chrIV	1414400	1414878	2.85721	64		chrIX	362959	363550	3.60215	34
chrIV	1084275	1085362	3.76253	-246		chrV	182395	183197	3.91242	196		chrIV	1492823	1494115	3.52129	-1117		chrVI	27018	27736	3.18922	-855		chrIV	1416634	1417414	2.83299	-150		chrIX	369656	370085	3.22674	37
chrIV	1087341	1087899	4.13563	39		chrV	186847	188756	4.58898	-475		chrIV	1500385	1501109	3.3055	-194		chrVI	36314	37043	3.16469	-124		chrIV	1422575	1423183	2.91352	116		chrIX	374040	374725	2.84672	-77
chrIV	1092373	1092882	2.23483	-117		chrV	192328	193171	1.65	-47		chrIV	1506529	1507755	3.28087	220		chrVI	39888	40760	3.04738	-97		chrIV	1426924	1427585	2.94752	-48		chrIX	375035	375845	5	9
chrIV	1093393	1093958	1.94803	-87		chrV	198673	199129	3.60993	89		chrIV	1509466	1510152	3.15907	-1093		chrVI	42654	43082	3.17343	53		chrIV	1427859	1428300	2.90226	40		chrIX	377989	378952	5	-15
chrIV	1101772	1102320	1.61521	-138		chrV	204753	205469	4.15051	-140		chrIV	1513964	1516865	3.41949	2260		chrVI	47562	48167	3.09078	-121		chrIV	1430552	1431325	2.94282	-73		chrIX	396760	397672	3.37989	-78
chrIV	1103254	1104077	3.50503	-92		chrV	209985	210692	2.81709	-107		chrIV	1520576	1521442	3.43941	-311		chrVI	48836	49466	3.20692	12		chrIV	1433540	1434473	2.85471	261		chrIX	398052	398997	5	11
chrIV	1105625	1106256	1.47823	-114		chrV	212914	213700	3.78711	-130		chrIV	1525782	1526247	2.83054	-306		chrVI	55752	56697	2.99445	-111		chrIV	1435923	1437242	2.93054	-347		chrIX	399332	400098	3.84756	-62
chrIV	1107794	1109000	3.9734	-87		chrV	214478	215440	4.75752	-104		chrIV	1528212	1528887	1.82379	2229		chrVI	58464	58838	3.09798	-131		chrIV	1443083	1443534	2.68374	94		chrIX	405552	406236	5	73
chrIV	1110441	1110820	2.86725	42		chrV	227922	228835	3.17327	-72		chrV	3200	3981	3.50345	506		chrVI	63700	64341	2.99917	-28		chrIV	1446740	1447190	2.93409	29		chrIX	415275	416383	4.59256	-212
chrIV	1112148	1112761	1.85467	-162		chrV	229116	230036	3.84055	-95		chrV	10975	13884	3.31385	-1290		chrVI	78894	79438	3.15853	-5		chrIV	1447567	1448169	2.75645	38		chrIX	424437	425777	3.02251	-594
chrIV	1113753	1114492	3.86359	-96		chrV	232258	232716	2.34587	26		chrV	19502	21818	3.45803	1071		chrVI	79972	80536	3.13679	-41		chrIV	1461241	1461710	2.90932	78		chrX	3413	4463	3.88624	2192
chrIV	1116345	1117414	4.05649	-117		chrV	246342	246910	3.62895	-123		chrV	25544	28083	3.44901	-38		chrVI	81579	82339	3.08874	-47		chrIV	1472691	1473420	2.87167	-57		chrX	27982	28838	3.33212	1523
chrIV	1124746	1126223	3.57092	183		chrV	247910	248579	2.70971	-88		chrV	30850	31415	3.52807	106		chrVI	87006	87504	3.18531	-21		chrIV	1476017	1477426	2.87573	-246		chrX	37561	38164	2.74954	-142
chrIV	1124746	1126223	3.57092	183		chrV	249517	250177	2.60641	-871		chrV	39273	39855	3.45895	-27		chrVI	90763	91303	3.06125	47		chrIV	1479854	1480790	2.82504	-103		chrX	54158	54690	4.3555	45
chrIV	1127323	1128089	2.85902	-111		chrV	254134	255010	5	-84		chrV	44848	46246	3.34576	174		chrVI	94810	95165	3.16073	22		chrIV	1483066	1484214	2.90992	-237		chrX	59804	60368	2.3584	96
chrIV	1129443	1129925	3.29146	96		chrV	270895	272798	3.77878	79		chrV	46744	47351	3.42975	-120		chrVI	109646	110611	2.57451	-199		chrIV	1492823	1494037	2.90986	-1156		chrX	63166	63930	4.97088	-257
chrIV	1130899	1131451	1.97818	174		chrV	288820	289767	1.56574	-948		chrV	51274	52192	3.46191	-194		chrVI	111547	112153	3.20602	-495		chrIV	1509240	1510127	2.88618	-1218		chrX	71001	71691	4.02901	-20
chrIV	1135175	1135611	3.17743	38		chrV	301153	302978	3.47443	261		chrV	55864	56763	3.38643	-212		chrVI	115595	116261	3.18146	-185		chrIV	1514037	1515725	2.9314	2787		chrX	88267	89025	3.75125	-86
chrIV	1140389	1141046	1.74293	-450		chrV	307262	307874	4.14576	-85		chrV	57947	58651	3.43831	-79		chrVI	118866	119749	1.73003	-121		chrIV	1515965	1516883	2.89432	1251		chrX	94102	95326	5	-184
chrIV	1144928	1145496	1.66823	120		chrV	312985	314443	3.17038	-216		chrV	60628	61271	3.49761	-99		chrVI	122847	123603	2.88276	-254		chrIV	1520184	1521444	2.90464	-116		chrX	109326	110008	2.50188	-206
chrIV	1145912	1146604	3.26262	-61		chrV	319625	320154	2.57806	-73		chrV	66529	66933	3.13736	66		chrVI	129792	130417	3.20152	-229		chrIV	1525798	1526253	2.85299	-295		chrX	112932	113566	3.91014	84
chrIV	1149293	1149949	2.96672	-155		chrV	325583	326366	3.50611	-39		chrV	70160	70729	3.49851	-33		chrVI	146626	147402	3.16448	-80		chrV	2919	3954	2.82821	660		chrX	142494	143304	4.295	-332
chrIV	1150265	1150693	2.78024	41		chrV	326656	327490	4.46918	8		chrV	73481	73966	3.507	-47		chrVI	148793	150343	3.13427	-448		chrV	9530	10194	2.80769	-2309		chrX	146855	147453	4.54059	53
chrIV	1153424	1154133	2.93303	-153		chrV	327780	328786	5	-143		chrV	75370	76069	3.18138	-224		chrVI	160081	160776	3.14559	-106		chrV	10979	12371	2.91904	-2045		chrX	150686	151219	2.04794	-8
chrIV	1157181	1157840	2.98183	-1583		chrV	330247	330980	2.5096	38		chrV	79926	80787	3.5137	-105		chrVI	161869	162704	3.1979	-201		chrV	19600	22307	2.80808	1365		chrX	187430	188085	4.65974	-114
chrIV	1158953	1159809	2.96597	1939		chrV	332457	333064	4.46459	69		chrV	82536	83225	3.32851	-278		chrVI	167048	167375	3.18741	46		chrV	30610	31410	2.9397	229		chrX	189131	190126	3.95902	-87
chrIV	1168597	1169332	3.09748	-213		chrV	347266	348554	3.93866	-298		chrV	84369	84796	3.48794	-31		chrVI	184150	184784	3.14447	-35		chrV	33935	34697	2.91297	-91		chrX	190794	191515	2.37639	-65
chrIV	1173988	1175799	3.21355	-718		chrV	353392	354740	3.68957	-1074		chrV	86790	87104	3.17393	10		chrVI	194011	195010	2.83683	-301		chrV	39195	39824	2.93752	27		chrX	207617	208206	3.99144	35
chrIV	1177946	1178717	3.19781	-158		chrV	358680	359752	4.35365	-155		chrV	89717	90506	3.48586	-146		chrVI	206738	207942	3.2054	-112		chrV	43050	43548	2.81369	47		chrX	217067	217463	2.96133	44
chrIV	1185834	1186429	4.65111	25		chrV	361369	362305	3.53438	-43		chrV	97544	98433	3.42198	-193		chrVI	209752	211179	2.98267	-398		chrV	44966	45445	2.7911	515		chrX	226838	228076	2.98644	130
chrIV	1189937	1190281	1.91536	50		chrV	366602	367492	3.98619	245		chrV	99155	99818	3.33279	819		chrVI	219823	220429	3.21459	-20		chrV	46912	47498	2.83821	37		chrX	241419	241911	2.29753	-417
chrIV	1195102	1195655	2.11356	-495		chrV	371730	372635	3.60503	-143		chrV	110843	111659	3.45269	-170		chrVI	221946	222363	3.20344	-737		chrV	51273	52129	2.85889	-162		chrX	245365	245839	3.30959	11
chrIV	1196037	1196867	2.29504	-189		chrV	374279	374954	4.07915	-72		chrV	115628	116366	3.52651	-170		chrVI	226832	227216	3.20768	61		chrV	55683	56824	2.83669	-152		chrX	256466	257576	4.52443	-209
chrIV	1198475	1199361	3.24008	-221		chrV	377339	378503	3.97599	-307		chrV	118100	118493	3.47547	-917		chrVI	228812	229822	2.03818	-63		chrV	57982	59391	2.80058	309		chrX	262251	262808	2.45094	22
chrIV	1203931	1204675	2.87396	-93		chrV	381875	382315	2.93687	8		chrV	123529	123913	3.39296	64		chrVI	233481	234235	3.13359	-314		chrV	60275	61309	2.86078	59		chrX	284974	285585	3.33785	-9
chrIV	1206065	1206695	4.61516	3		chrV	387073	387449	2.88919	29		chrV	126106	126893	3.31908	-129		chrVI	238070	238689	3.20915	-78		chrV	63026	64079	2.93092	-175		chrX	291506	292295	3.08052	-1127
chrIV	1212706	1213099	1.97703	55		chrV	393789	394398	3.1231	-382		chrV	128168	128899	3.4544	74		chrVI	239419	239953	3.11748	141		chrV	64822	65500	2.69449	6		chrX	294941	295906	5	179
chrIV	1217334	1217897	2.53572	-36		chrV	394901	395640	1.71991	-404		chrV	135512	137680	3.40937	182		chrVI	241148	242283	3.13503	-279		chrV	70246	70881	2.92651	86		chrX	312348	312984	4.64	40
chrIV	1218780	1219644	3.7058	-102		chrV	395906	396352	3.23227	43		chrV	146543	147165	3.33057	-97		chrVI	244935	245287	3.15989	55		chrV	75438	76128	2.86023	-161		chrX	314617	317685	5	324
chrIV	1222182	1222942	3.3107	-197		chrV	398841	399746	2.95322	-239		chrV	147709	148441	3.4119	-101		chrVI	245693	246369	3.20556	-115		chrV	80057	80977	2.93098	55		chrX	319630	320309	3.89691	-46
chrIV	1223544	1224086	2.45473	579		chrV	400280	401429	3.96122	-13		chrV	149764	152680	3.53682	-244		chrVI	251493	252629	3.08278	-258		chrV	82521	83193	2.78378	-254		chrX	322834	323539	3.48756	-199
chrIV	1224568	1225076	3.81514	65		chrV	402015	402696	3.17712	-19		chrV	156147	157160	3.16893	-149		chrVI	262785	263426	3.18125	-1098		chrV	84385	84770	2.86435	-26		chrX	324817	325262	2.21362	76
chrIV	1226238	1227070	2.72542	-118		chrV	404103	404954	4.29391	-177		chrV	158842	159816	3.40658	-211		chrVII	27297	28059	3.01434	-194		chrV	89856	90523	2.88993	-68		chrX	334156	334519	2.79165	73
chrIV	1229340	1230322	3.4728	-222		chrV	409024	409998	4.76924	-448		chrV	162210	163130	3.16376	-53		chrVII	31726	32203	3.08499	55		chrV	97556	98337	2.87882	-151		chrX	342296	342769	2.95304	11
chrIV	1235883	1236302	1.39733	-465		chrV	413957	414809	4.59652	-98		chrV	166402	167113	3.52085	127		chrVII	36787	37239	3.21374	80		chrV	99161	99790	2.915	808		chrX	359389	359878	3.19411	42
chrIV	1238585	1238925	1.68018	95		chrV	415571	417061	3.95665	457		chrV	167358	168082	3.43821	-835		chrVII	38533	39354	2.94379	-79		chrV	110851	111878	2.72425	-56		chrX	365450	366071	3.80333	-23
chrIV	1240143	1240932	2.70336	138		chrV	430376	431005	1.3435	-242		chrV	171592	172408	3.50366	-115		chrVII	41149	41829	3.01645	-9		chrV	115648	116393	2.95546	-146		chrX	373671	374308	3.80731	-191
chrIV	1245982	1246474	1.68165	144		chrV	431911	432629	3.30233	-225		chrV	172931	174030	3.28558	-143		chrVII	42961	43671	3.21261	9		chrV	116865	117458	2.66005	-49		chrX	383663	384127	2.93237	58
chrIV	1249634	1250316	2.03992	-154		chrV	441519	441918	2.7755	100		chrV	174348	176398	3.22594	125		chrVII	45287	45656	3.13195	27		chrV	118096	118461	2.91828	-899		chrX	393808	394235	3.75752	55
chrIV	1256593	1256990	3.35332	55		chrV	464485	465302	4.48946	-52		chrV	178499	179074	3.33353	-54		chrVII	49245	49771	3.21242	-44		chrV	119992	121775	2.89276	417		chrX	407264	407893	4.49005	21
chrIV	1257957	1258927	3.05736	-254		chrV	467050	467842	3.61566	24		chrV	182278	182922	3.47932	0		chrVII	53161	54055	3.13868	-80		chrV	123544	123949	2.91231	90		chrX	410681	411146	2.67586	126
chrIV	1259562	1260149	1.7516	-45		chrV	472234	472618	2.93921	-2		chrV	184182	184778	3.5048	-61		chrVII	55232	56699	3.13819	-170		chrV	126065	126961	2.80859	-116		chrX	413191	413822	3.4621	-108
chrIV	1263114	1263604	2.65683	35		chrV	473729	475375	2.16067	253		chrV	198675	199047	3.35482	49		chrVII	58819	59306	3.19099	-59		chrV	128141	128934	2.9253	70		chrX	415506	415971	4.05244	-969
chrIV	1267004	1267777	2.98861	-80		chrV	482681	483570	2.8572	-278		chrV	200770	201351	3.52263	-15		chrVII	63404	63973	3.19598	-69		chrV	131209	131793	2.81418	-271		chrX	442284	442736	2.97586	43
chrIV	1275069	1276744	2.56217	1262		chrV	484071	485055	4.03271	-222		chrV	204859	205455	3.4669	-94		chrVII	66796	67811	3.16855	-294		chrV	136316	137514	2.9047	-137		chrX	445440	446071	2.40808	-167
chrIV	1277026	1277869	3.6164	-198		chrV	500078	500775	2.45771	-79		chrV	210048	210736	3.47632	-160		chrVII	72855	73707	3.11602	-59		chrV	146514	147208	2.89086	-90		chrX	448906	449570	4.74802	36
chrIV	1278931	1279964	2.8118	238		chrV	502583	503261	1.84302	-28		chrV	212933	213645	3.52563	-112		chrVII	76718	77122	3.21318	26		chrV	147747	148469	2.9074	-68		chrX	450361	451232	2.85949	-223
chrIV	1289290	1289600	2.25269	39		chrV	522272	523293	4.93288	-114		chrV	214490	215298	3.25917	-147		chrVII	80929	81636	3.17469	-97		chrV	149662	151991	2.94067	151		chrX	466681	467600	3.65916	-108
chrIV	1292021	1293358	2.61618	401		chrV	525656	527614	3.52241	-447		chrV	227971	228782	3.34594	-74		chrVII	82077	82768	3.15584	49		chrV	156159	157212	2.58477	-117		chrX	469372	469984	2.54255	-99
chrIV	1294102	1295009	4.48778	-137		chrV	535760	536741	4.49269	-49		chrV	229240	229987	3.48849	-133		chrVII	83959	84892	3.14278	-169		chrV	158994	159805	2.87181	-180		chrX	490616	491405	3.38943	-70
chrIV	1295450	1296130	1.89772	-379		chrV	541254	541879	3.34902	-123		chrV	238538	239733	3.28034	638		chrVII	90927	91760	3.06247	-88		chrV	162296	163168	2.90017	9		chrX	496150	496834	2.51366	-41
chrIV	1296692	1297212	1.57787	-266		chrV	550916	551227	2.88416	50		chrV	246371	246902	3.53357	-134		chrVII	92152	92865	3.04374	-3		chrV	166296	167930	2.70833	-228		chrX	513501	514389	3.63293	-110
chrIV	1297993	1298628	2.59997	-121		chrV	552101	552902	3.43143	-23		chrV	254164	254950	3.36259	-99		chrVII	93448	94072	3.21335	-32		chrV	166296	167930	2.70833	-228		chrX	517266	517719	3.38179	20
chrIV	1300757	1301094	2.46786	-690		chrV	553523	554360	3.21005	27		chrV	270975	272732	3.40515	86		chrVII	114439	115174	3.19254	-143		chrV	171481	172446	2.88449	-146		chrX	531867	532300	2.81061	22
chrIV	1302358	1303471	2.36987	-259		chrV	558465	561589	3.57412	573		chrV	291220	292067	3.50238	-422		chrVII	120705	121178	3.1492	-35		chrV	172935	173677	2.87796	32		chrX	535477	536086	2.75163	-274
chrIV	1311850	1312238	1.59354	4		chrV	562356	564425	3.47526	-766		chrV	307039	307879	3.49451	-194		chrVII	123010	124792	3.13884	141		chrV	174834	176013	2.69207	176		chrX	542391	542815	2.9179	-101
chrIV	1317572	1318209	3.24438	-118		chrV	573033	573889	4.04666	1918		chrV	313304	314472	3.51561	-390		chrVII	130908	131807	2.76084	-167		chrV	177374	178049	2.89711	-123		chrX	554493	556250	5	177
chrIV	1319005	1320293	2.6914	192		chrVI	2111	3669	4.29049	-275		chrV	325601	326342	3.43431	-36		chrVII	141430	141955	3.08422	33		chrV	178519	179107	2.89949	-28		chrX	558860	559645	3.4798	-95
chrIV	1323765	1324364	1.89001	174		chrVI	26466	29892	3.90555	-53		chrV	330200	330850	3.42272	-51		chrVII	143877	144292	3.20762	-723		chrV	182364	183268	2.90262	216		chrX	567147	567894	3.25341	-77
chrIV	1325000	1325630	3.95395	-14		chrVI	36273	37075	3.26834	-129		chrV	332488	333234	3.46422	-31		chrVII	157356	158149	3.20292	-153		chrV	184129	184693	2.79851	-130		chrX	583224	583970	3.35903	-60
chrIV	1328308	1328657	1.88087	-13		chrVI	39896	40766	4.71779	-90		chrV	347381	348531	3.53459	-344		chrVII	172835	173530	3.15694	-104		chrV	185415	186761	2.8266	-1388		chrX	585787	586364	4.38585	8
chrIV	1330922	1331439	3.32949	-56		chrVI	42643	43392	3.74353	203		chrV	349163	350160	3.24037	-316		chrVII	174143	174825	3.20308	-61		chrV	187026	188811	2.89893	-358		chrX	587153	587747	2.99924	-77
chrIV	1333643	1334774	3.0671	-240		chrVI	47328	48486	3.27919	-163		chrV	358765	359705	3.51092	-174		chrVII	180290	181037	3.11482	-36		chrV	192352	192997	2.83097	-51		chrX	603882	604741	3.60834	-109
chrIV	1339154	1339871	2.47173	-163		chrVI	48754	49543	3.45629	10		chrV	361478	362349	3.39075	-120		chrVII	182129	182702	3.14598	26		chrV	198671	199106	2.7735	77		chrX	655693	656229	4.28913	2
chrIV	1341825	1342714	3.20274	-223		chrVI	55762	56691	4.97752	-109		chrV	366563	367273	3.51843	116		chrVII	185863	186369	3.20495	57		chrV	200729	201404	2.94222	-9		chrX	695520	696161	3.5431	-65
chrIV	1349733	1350578	2.64746	-134		chrVI	58508	58773	1.69171	-141		chrV	371721	373383	3.41361	226		chrVII	190832	191411	3.19116	-7		chrV	204902	205498	2.62304	-51		chrXI	47857	48434	3.24519	-48
chrIV	1353162	1354402	4.06623	57		chrVI	63656	64321	3.86922	4		chrV	374370	374933	3.49086	-107		chrVII	193066	193481	3.12152	26		chrV	210029	210680	2.86662	-123		chrXI	49508	50318	3.88415	-104
chrIV	1355501	1356308	2.37468	-160		chrVI	65219	65648	2.23055	-43		chrV	377453	378600	3.48044	-413		chrVII	196133	196673	3.13019	0		chrV	212960	213630	2.93188	-118		chrXI	53481	54065	4.39549	69
chrIV	1358601	1359478	4.07015	-138		chrVI	76650	77646	1.36492	317		chrV	381886	382566	3.40527	-123		chrVII	199907	200679	3.10626	-151		chrV	214444	215594	2.7442	-44		chrXI	63226	63678	2.569	-93
chrIV	1362641	1362956	2.34839	-79		chrVI	78473	79514	3.69765	167		chrV	387022	387439	3.21485	-1		chrVII	202423	202941	3.18628	-39		chrV	227915	228830	2.87421	-78		chrXI	75265	76069	4.07416	-133
chrIV	1365208	1367765	3.68768	340		chrVI	79790	80572	2.23831	32		chrV	389855	390587	3.25555	-169		chrVII	213682	214312	3.11492	-84		chrV	229211	230016	2.87767	-133		chrXI	78397	78768	2.05942	63
chrIV	1369349	1369940	2.67387	-145		chrVI	81512	82348	4.60229	-18		chrV	393717	394389	3.28245	-341		chrVII	215769	216629	3.19346	-74		chrV	232272	232699	2.7223	25		chrXI	80333	81411	4.31576	-163
chrIV	1381826	1382498	2.40278	-116		chrVI	86950	87453	3.63823	32		chrV	395951	396395	3.4881	-1		chrVII	217122	217833	3.03551	-46		chrV	238597	239645	2.83422	653		chrXI	84449	84904	2.05385	-27
chrIV	1383039	1383947	3.38882	-50		chrVI	90866	91249	3.82634	72		chrV	398948	399591	3.3159	-215		chrVII	225597	226580	3.15636	-310		chrV	246335	246884	2.92448	-107		chrXI	88322	88876	2.41949	187
chrIV	1385012	1387089	4.2561	-22		chrVI	97852	98786	2.47095	1280		chrV	400556	401423	3.49038	-145		chrVII	229432	230519	3.20855	-267		chrV	254145	255104	2.80314	-31		chrXI	92967	93677	4.76379	-24
chrIV	1388631	1389042	1.60131	-35		chrVI	109561	113101	3.90899	684		chrV	401992	402683	3.30009	-37		chrVII	234289	234895	3.1109	-85		chrV	270981	272823	2.94396	134		chrXI	112239	112724	3.95236	21
chrIV	1394241	1395268	4.39139	-181		chrVI	109561	113101	3.90899	684		chrV	404081	404886	3.52736	-132		chrVII	237948	238459	3.03119	-85		chrV	291251	292031	2.91677	-425		chrXI	126785	127708	3.34754	-228
chrIV	1398552	1399285	3.58407	-96		chrVI	115494	116376	3.93686	-192		chrV	408822	409972	2.43288	-334		chrVII	244892	245672	3.16631	-270		chrV	301115	302990	2.87399	274		chrXI	133921	134512	2.43743	-83
chrIV	1400972	1401378	2.75203	39		chrVI	118798	119744	5	-158		chrV	413935	414862	3.43811	-82		chrVII	249628	250128	3.01666	9		chrV	307158	307894	2.94626	-127		chrXI	148650	149105	2.91995	-40
chrIV	1405573	1406367	2.79303	-116		chrVI	122928	123656	2.46214	-187		chrV	415508	417003	3.53081	397		chrVII	257081	257587	3.18245	-373		chrV	313064	314418	2.76057	-243		chrXI	153076	153618	2.7685	78
chrIV	1411065	1412318	2.56864	-565		chrVI	129721	130550	3.46864	-198		chrV	435319	436349	3.47147	-1357		chrVII	265766	266349	2.99394	-87		chrV	316238	316783	2.84296	89		chrXI	161215	161874	4.75318	-56
chrIV	1414406	1414887	2.91973	72		chrVI	131268	131993	2.91283	-179		chrV	441455	441971	3.45449	106		chrVII	268875	269547	3.15715	-136		chrV	327838	328794	2.9101	-161		chrXI	176200	177078	3.20426	-142
chrIV	1416646	1417505	2.45704	-202		chrVI	143965	144843	1.63785	2530		chrV	451135	451757	3.38499	-119		chrVII	269855	270305	3.15903	64		chrV	330231	330935	2.87109	7		chrXI	188452	188924	3.04122	-48
chrIV	1422605	1422990	2.57722	35		chrVI	146533	147577	3.75453	-76		chrV	464560	465327	3.48706	-102		chrVII	283687	284616	3.19581	-215		chrV	332457	333059	2.79879	72		chrXI	191263	191863	1.94451	-121
chrIV	1430511	1431295	2.82358	-109		chrVI	148753	150291	4.09975	412		chrV	467185	467858	3.49568	-52		chrVII	295749	296169	3.2143	27		chrV	342769	343108	2.79218	84		chrXI	192800	193301	3.37608	19
chrIV	1433985	1434819	3.12777	-134		chrVI	161684	162681	2.85848	-305		chrV	472208	472661	3.31091	-11		chrVII	299451	300306	2.44122	-99		chrV	347267	348465	2.80718	-254		chrXI	212704	213217	4.07141	37
chrIV	1435818	1437181	3.78395	283		chrVI	167032	167361	3.12005	61		chrV	473796	475309	3.33613	252		chrVII	305926	306937	2.91937	-128		chrV	349119	350129	2.76448	-278		chrXI	256156	256914	4.19532	-63
chrIV	1446749	1447270	3.38978	-16		chrVI	167905	168787	3.28898	458		chrV	484078	485031	3.5298	-214		chrVII	309877	310601	3.17887	-66		chrV	352448	354308	2.84417	1680		chrXI	282017	283034	1.42223	-197
chrIV	1447524	1448096	2.25705	-20		chrVI	169074	170399	4.55373	-185		chrV	487404	487839	3.46841	2834		chrVII	312898	313492	3.10363	-39		chrV	358382	359746	2.86714	-3		chrXI	288551	289300	4.91518	81
chrIV	1461292	1461696	2.77673	60		chrVI	173219	174460	1.9644	37		chrV	488168	488827	3.45137	2080		chrVII	314183	315102	3.08343	12		chrV	361468	362325	2.94478	-103		chrXI	290824	291484	3.14395	-299
chrIV	1472734	1473335	3.01443	-36		chrVI	175731	176755	2.70517	148		chrV	502683	503272	3.27873	-84		chrVII	319303	320394	2.97559	-1933		chrV	366596	367317	2.95559	155		chrXI	294126	294619	3.01412	-65
chrIV	1476041	1477422	2.78876	-256		chrVI	184165	184792	3.10286	-23		chrV	522275	523301	3.30192	-119		chrVII	321270	322133	2.87812	-80		chrV	374225	374893	2.92477	-14		chrXI	295847	296678	1.69299	-70
chrIV	1478206	1478877	2.32899	-66		chrVI	193784	195052	4.42353	-394		chrV	535826	536600	3.52587	-87		chrVII	334430	335107	3.11562	-117		chrV	377413	378512	2.89906	-349		chrXI	314248	314745	2.62774	-315
chrIV	1479832	1480694	3.31717	-162		chrVI	204495	206196	2.79456	-596		chrV	541196	541865	3.40994	-159		chrVII	346770	347510	3.00536	21		chrV	381819	382360	2.95379	13		chrXI	329998	330351	2.34947	9
chrIV	1483181	1484067	3.91107	-221		chrVI	206704	208081	3.58873	-59		chrV	552140	552762	3.41518	-74		chrVII	352062	352456	3.2038	39		chrV	387018	387501	2.9163	28		chrXI	333681	334251	3.90127	3
chrIV	1492816	1494107	3.96519	-1124		chrVI	219701	220401	4.04196	55		chrV	553659	554378	3.45089	-50		chrVII	352772	353264	3.17553	-40		chrV	393708	394196	2.93374	-240		chrXI	348917	349698	3.73453	-155
chrIV	1497518	1498404	1.52484	-193		chrVI	221964	222374	3.76284	-751		chrV	558837	561603	3.50907	766		chrVII	355301	355997	3.10958	-178		chrV	395922	396367	2.7589	27		chrXI	375290	375661	2.53526	20
chrIV	1500366	1501142	2.36111	-201		chrVI	226840	227323	3.57816	119		chrV	562497	569570	1.52507	-196		chrVII	358235	358872	3.00677	-82		chrV	398809	399672	2.93601	-186		chrXI	385564	386087	3.99387	68
chrIV	1506530	1507279	2.49464	457		chrVI	228825	229848	5	-43		chrV	570645	570968	3.46735	-348		chrVII	366710	367083	3.15723	-901		chrV	400435	401418	2.9352	-85		chrXI	396795	397382	4.33735	159
chrIV	1509464	1510184	2.50081	-1078		chrVI	233322	234230	4.25552	-232		chrV	571215	572018	3.33335	137		chrVII	374512	375420	2.90544	-121		chrV	402005	402649	2.90587	-48		chrXI	398188	398767	3.77867	272
chrIV	1513927	1516881	3.25128	2271		chrVI	238020	238763	4.17383	-66		chrV	573029	573697	3.44633	1883		chrVII	377192	377941	3.15459	-42		chrV	403991	404988	2.90381	-138		chrXI	401694	402870	4.13985	-202
chrIV	1517461	1519328	2.20889	-720		chrVI	239201	240095	3.06457	179		chrVI	2299	4385	3.48402	-4		chrVII	382904	383825	2.94259	-157		chrV	409031	410002	2.8345	-454		chrXI	403603	404469	5	-66
chrIV	1520543	1521434	3.02547	-291		chrVI	241121	242613	3.53755	-131		chrVI	10272	11881	3.30214	-108		chrVII	389485	390212	3.01851	-138		chrV	431920	432593	2.84131	-238		chrXI	416601	417166	4.05785	29
chrIV	1525801	1526250	2.49235	-295		chrVI	243433	244529	2.66461	178		chrVI	12145	14033	3.16664	160		chrVII	391706	392414	3.05972	-163		chrV	435297	436299	2.89568	-1393		chrXI	417745	418541	4.11995	-120
chrIV	1528209	1528881	5	2224		chrVI	244830	246410	4.02344	-454		chrVI	22681	23601	3.42622	-282		chrVII	393572	394231	3.19869	-84		chrV	437544	438290	2.88276	-114		chrXI	425721	426534	3.79743	-114
chrV	3200	3986	3.32758	504		chrVI	251491	252737	4.23809	-311		chrVI	27051	30057	3.38971	322		chrVII	404011	404425	3.14085	531		chrV	441532	441952	2.80884	77		chrXI	429120	429559	2.24107	38
chrV	11013	13857	2.36349	-1285		chrVII	27291	28034	3.7846	-179		chrVI	36246	37076	3.5007	-142		chrVII	416939	417744	3.1528	-141		chrV	451117	451760	2.77777	-126		chrXI	434474	435606	4.29205	-163
chrV	19467	21847	3.8165	1068		chrVII	29921	30889	1.97154	1231		chrVI	39910	40727	3.38289	-102		chrVII	418633	419056	3.21308	20		chrV	452929	453343	2.83496	-323		chrXI	437243	437955	3.511	-107
chrV	25546	28069	2.99458	-32		chrVII	31741	32187	3.62142	54		chrVI	42561	43119	3.53338	25		chrVII	428454	428860	3.20687	56		chrV	455945	456633	2.89825	-30		chrXI	442440	443416	4.54388	-206
chrV	30798	31410	3.25647	135		chrVII	38554	39362	4.75042	-65		chrVI	47521	48183	3.02876	-108		chrVII	433910	435012	3.16553	-882		chrV	464412	465324	2.92922	-26		chrXI	450913	452474	4.2147	260
chrV	33934	34656	2.22384	-112		chrVII	41185	41798	4.2962	-6		chrVI	48810	49406	3.49443	-31		chrVII	443125	443753	3.21122	-530		chrV	467025	467801	2.9306	57		chrXI	461029	461487	2.52081	-19
chrV	39258	39818	3.41705	-1		chrVII	42949	43749	3.25296	42		chrVI	55769	56682	3.34295	-110		chrVII	445860	446311	3.1801	57		chrV	472162	472691	2.94292	-3		chrXI	465991	466569	2.97796	-209
chrV	44832	46196	1.76168	207		chrVII	44918	45709	2.80121	-117		chrVI	63731	64415	3.48802	-80		chrVII	448326	448893	3.18071	-75		chrV	473792	475318	2.81271	250		chrXI	482898	483613	3.99873	-117
chrV	46730	47354	2.56721	-126		chrVII	52943	54031	3.41565	41		chrVI	78870	79472	3.37796	-10		chrVII	449659	450198	3.10762	28		chrV	482723	483560	2.73809	-294		chrXI	486942	488300	5	-149
chrV	51297	52157	2.82882	-188		chrVII	54905	56678	3.57493	4		chrVI	79947	80618	3.23152	-70		chrVII	451733	452743	1.51834	-134		chrV	484052	485125	2.59269	-199		chrXI	489410	490161	3.13355	-131
chrV	55849	56760	2.76826	-203		chrVII	58794	59334	3.68148	-58		chrVI	81572	82367	3.41938	-58		chrVII	457576	458384	3.08934	-110		chrV	487087	487848	2.94621	2680		chrXI	493416	494194	3.73661	-452
chrV	57935	58661	3.79202	-80		chrVII	61968	62674	1.69583	246		chrVI	86998	87567	3.39088	-49		chrVII	459266	460187	2.93896	-63		chrV	500059	500705	2.89588	-34		chrXI	499495	500529	2.70987	-179
chrV	60641	61268	2.82136	-104		chrVII	63400	64049	2.78647	-105		chrVI	90816	91282	3.5261	63		chrVII	461261	461937	3.16017	-67		chrV	502589	503217	2.84849	-9		chrXI	506196	507007	3.78501	85
chrV	64848	65659	3.16046	-87		chrVII	66375	67794	3.74522	-126		chrVI	97741	98935	3.3177	1261		chrVII	465607	466004	3.07109	-335		chrV	522134	523308	2.71737	-52		chrXI	507772	508313	3.45628	104
chrV	66530	66903	2.24919	80		chrVII	69300	69913	3.24308	-64		chrVI	103065	104567	3.39551	117		chrVII	493952	494646	3.13917	-125		chrV	535556	536923	2.91506	-60		chrXI	510392	511043	2.33816	-85
chrV	70189	70715	2.54465	-26		chrVII	72797	73720	4.83185	-81		chrVI	115529	116256	3.51988	-150		chrVII	499632	500371	3.21251	-96		chrV	541239	541863	2.86094	-139		chrXI	512731	513357	4.44964	115
chrV	73501	73973	3.01517	-34		chrVII	74122	75176	2.26136	1309		chrVI	118537	119749	2.87236	-286		chrVII	502617	503174	3.17132	-42		chrV	550875	551249	2.8745	60		chrXI	526242	527890	5	165
chrV	75350	76115	2.20415	-211		chrVII	80979	81688	3.45133	-148		chrVI	122904	123610	3.42685	-222		chrVII	505654	507126	2.45638	320		chrV	552118	552815	2.90073	-58		chrXI	547737	548495	4.47124	-100
chrV	79746	80758	2.92933	-210		chrVII	82029	82776	4.2715	29		chrVI	129723	130451	3.49984	-247		chrVII	510776	511655	3.12388	-214		chrV	553629	554418	2.9399	-55		chrXI	549351	549975	4.24456	215
chrV	82549	83235	2.12151	-289		chrVII	83913	84848	3.62811	-124		chrVI	131212	131998	3.41087	-205		chrVII	512759	513533	3.04837	-13		chrV	558503	559832	2.84774	-286		chrXI	551415	552018	4.10531	60
chrV	84385	84776	2.91235	-29		chrVII	90938	91796	4.70834	-65		chrVI	134425	135014	3.41629	2437		chrVII	514181	514820	3.17685	-53		chrV	560290	561572	2.93194	1477		chrXI	559353	559919	3.87393	-30
chrV	86797	87096	2.31575	10		chrVII	92149	92842	3.92975	-16		chrVI	135444	136483	3.49954	1193		chrVII	521711	522462	3.17845	-11		chrV	562214	564555	2.89033	-760		chrXI	565473	566480	5	-85
chrV	89742	90472	2.72959	-151		chrVII	93445	94090	2.65072	-24		chrVI	146577	147489	3.47624	-98		chrVII	523183	523801	3.21515	-295		chrV	570644	570996	2.68442	-335		chrXI	577929	578398	2.78745	-41
chrV	97566	98430	2.53195	-202		chrVII	98766	99200	3.33504	14		chrVI	148681	150327	3.51851	394		chrVII	532291	532987	3.1886	0		chrV	573059	573694	2.52317	1897		chrXI	578955	579457	2.99714	-3
chrV	99219	99780	1.87694	832		chrVII	107317	108778	2.5965	-110		chrVI	155585	156407	3.43461	-123		chrVII	545049	545459	2.92571	903		chrVI	2295	3184	2.93762	-125		chrXI	589163	589821	4.84408	-187
chrV	110816	111665	3.77989	-180		chrVII	110770	112142	1.42368	549		chrVI	160038	160804	3.30963	-114		chrVII	545931	546562	3.19024	-90		chrVI	3911	4360	2.61955	-290		chrXI	590067	590690	3.67947	-16
chrV	115623	116356	3.4014	-177		chrVII	114457	115274	2.96701	-202		chrVI	161698	162708	3.45849	-285		chrVII	558802	559390	2.60117	-228		chrVI	8966	13937	2.89793	89		chrXI	592270	593106	3.39703	-137
chrV	118114	118468	2.66328	-911		chrVII	120715	122146	2.76564	-524		chrVI	167741	170187	3.46245	-260		chrVII	578990	579719	3.09559	-121		chrVI	22645	23358	2.74302	-215		chrXI	598541	600198	5	311
chrV	120065	120774	2.41601	-121		chrVII	123006	124869	4.0588	104		chrVI	173234	174497	3.46031	11		chrVII	581126	581867	3.11412	-61		chrVI	26922	29987	2.94902	223		chrXI	619469	619942	3.45435	-99
chrV	121031	121702	3.40042	-66		chrVII	130892	131757	4.63365	-200		chrVI	175951	176790	3.46227	20		chrVII	595364	596084	3.1169	113		chrVI	36088	37088	2.94524	-215		chrXI	634972	635758	3.57778	-186
chrV	123553	123898	2.75836	69		chrVII	141411	141936	4.91067	52		chrVI	180568	181473	3.05059	-278		chrVII	596393	596733	3.19948	-130		chrVI	39850	40872	2.72071	-60		chrXI	640003	640820	4.66386	-128
chrV	126095	126911	4.29873	-126		chrVII	143911	144245	2.95784	-730		chrVI	184135	184728	3.45692	-70		chrVII	605276	606412	3.03174	-292		chrVI	42582	43189	2.92269	71		chrXI	650068	650751	3.0267	-2670
chrV	128158	128893	2.3857	82		chrVII	157256	158215	3.74691	-140		chrVI	191641	192079	3.31569	-877		chrVII	606927	607318	3.03409	-440		chrVI	47454	48292	2.93394	-129		chrXII	3289	3867	2.12723	723
chrV	131226	131901	1.47185	-208		chrVII	172818	173508	3.58791	-84		chrVI	193849	195030	3.361	-372		chrVII	615834	616387	3.12813	-146		chrVI	48805	49490	2.92773	9		chrXII	15707	16585	3.24724	-74
chrV	135530	137782	2.70053	122		chrVII	173880	174966	3.12208	-101		chrVI	204526	206161	3.4224	-594		chrVII	617031	618356	2.95638	73		chrVI	55743	56785	2.8091	-72		chrXII	40144	41002	5	-93
chrV	138275	138617	1.58261	1317		chrVII	180205	181096	4.6296	-49		chrVI	206963	207940	3.51712	0		chrVII	619604	620617	3.21449	-253		chrVI	63598	64326	2.89986	31		chrXII	49380	50166	3.41222	-165
chrV	146569	147162	1.93963	-85		chrVII	182045	182960	4.45704	113		chrVI	209819	211145	3.3863	-414		chrVII	621506	623759	3.11991	-834		chrVI	65205	65657	2.8875	-46		chrXII	65702	67027	3.78291	153
chrV	147740	148426	2.88133	-93		chrVII	185883	186369	3.44387	67		chrVI	219843	220663	3.51498	-147		chrVII	626818	627457	3.12237	-54		chrVI	78501	79482	2.95192	169		chrXII	67991	68786	4.95796	-133
chrV	149780	152748	3.41016	-286		chrVII	190748	191462	2.86878	-24		chrVI	221901	223400	3.39244	308		chrVII	633861	634594	3.06977	-76		chrVI	79885	80858	2.93965	-159		chrXII	72758	73743	5	-105
chrV	149780	152748	3.41016	-286		chrVII	192986	193712	3.57978	-49		chrVI	225793	226520	3.32945	135		chrVII	635337	636009	3.09348	-39		chrVI	81350	82352	2.83366	61		chrXII	99843	101102	4.39224	-272
chrV	156175	157156	4.55562	-137		chrVII	196006	197106	3.61812	-153		chrVI	226826	227265	3.40479	83		chrVII	636689	637986	3.15074	239		chrVI	86892	87484	2.95279	46		chrXII	111192	112060	3.74705	-51
chrV	158801	159794	2.6949	-180		chrVII	197887	198495	2.70066	53		chrVI	228866	229744	3.26449	-75		chrVII	639190	639820	3.10416	8		chrVI	90825	91330	2.95527	92		chrXII	114217	114802	2.08882	-1922
chrV	162177	163119	4.00849	-75		chrVII	199868	200739	4.18477	-162		chrVI	233344	234202	3.26419	-229		chrVII	640095	640597	3.10008	25		chrVI	100858	101338	2.89806	-493		chrXII	121145	121604	3.12508	53
chrV	164192	164795	2.35477	-33		chrVII	202462	203145	1.59342	83		chrVI	238036	238746	3.50508	-67		chrVII	641552	642353	3.14367	-57		chrVI	103454	104567	2.87825	312		chrXII	126980	128039	5	-13
chrV	166390	167103	3.18724	138		chrVII	213647	214493	3.69522	-11		chrVI	239405	240097	3.46129	76		chrVII	643506	644321	3.16059	-130		chrVI	115536	116362	2.9357	-196		chrXII	130427	132377	5	12
chrV	167385	168073	2.31492	-844		chrVII	215614	216674	3.828	-48		chrVI	241163	242281	3.45374	-276		chrVII	646495	647231	3.14238	-48		chrVI	118509	119795	2.78127	-277		chrXII	136076	136699	3.72626	43
chrV	171568	172425	2.6453	-118		chrVII	217107	217891	4.9451	-25		chrVI	244907	246385	3.51293	-480		chrVII	647786	648387	3.08473	55		chrVI	122892	123632	2.92286	-217		chrXII	140951	141392	1.97252	99
chrV	172991	174064	2.43307	-190		chrVII	225462	226588	2.98036	-374		chrVI	251507	252683	3.43921	-292		chrVII	656149	657021	3.18766	-375		chrVI	129755	130558	2.91249	-177		chrXII	156036	156514	2.45324	59
chrV	174371	176471	4.15267	173		chrVII	229340	230503	3.25116	-236		chrVII	27258	28023	3.40228	-157		chrVII	666142	666507	3.1975	-16		chrVI	131227	132022	2.88578	-185		chrXII	163821	164810	2.24353	-76
chrV	178556	179054	3.77855	-36		chrVII	234073	236184	3.28274	-622		chrVII	29970	30899	3.25947	1201		chrVII	671685	672275	3.10532	-206		chrVI	146499	147592	2.93888	-85		chrXII	165845	166565	3.1502	-122
chrV	182313	182999	2.87247	56		chrVII	237870	238503	3.40482	-68		chrVII	31545	32177	3.50374	-49		chrVII	676060	676800	3.18622	-88		chrVI	148691	150375	2.91689	423		chrXII	167532	168026	3.14186	23
chrV	184121	184760	2.64602	-100		chrVII	244832	245715	3.5725	-262		chrVII	36755	37360	3.52285	125		chrVII	687370	688146	3.07735	-141		chrVI	152966	153629	2.90042	-95		chrXII	168779	169347	3.81333	-40
chrV	191575	191930	1.53446	35		chrVII	249224	250129	4.43344	-146		chrVII	38501	39322	3.41839	-111		chrVII	689704	690382	3.19892	-202		chrVI	155606	156363	2.84858	-112		chrXII	174741	175538	2.99502	-87
chrV	194325	195321	1.77439	-284		chrVII	253429	254096	2.01114	96		chrVII	41129	41764	3.50821	-51		chrVII	694768	695794	3.05788	-136		chrVI	160003	160807	2.90171	-130		chrXII	176994	177989	3.08671	-76
chrV	198676	199041	2.87099	47		chrVII	257068	257675	2.49979	-335		chrVII	43002	43666	3.48905	27		chrVII	698109	698853	3.15355	-113		chrVI	161760	162751	2.90122	-232		chrXII	179220	180312	2.89514	-160
chrV	200735	201351	3.56214	-33		chrVII	265655	266388	2.87264	-123		chrVII	45051	45662	3.32453	-88		chrVII	699488	700185	2.91581	-51		chrVI	164674	165318	2.92419	-71		chrXII	193065	194686	1.65015	-576
chrV	201792	203054	2.03466	231		chrVII	268889	271267	2.95899	66		chrVII	53257	54043	3.39764	-122		chrVII	708900	709819	3.08813	1750		chrVI	167003	167389	2.92216	62		chrXII	204638	205224	1.91944	-60
chrV	204705	205457	3.28321	-170		chrVII	276169	277124	2.4423	67		chrVII	55052	56676	3.50971	-68		chrVII	713235	713981	3.21523	-101		chrVI	167886	168809	2.90854	460		chrXII	246564	247472	5	-41
chrV	208634	208987	1.95397	-337		chrVII	283746	284690	3.01286	-224		chrVII	58743	59318	3.47352	-91		chrVII	717033	717583	3.14951	-50		chrVI	173169	174465	2.86212	60		chrXII	260143	261269	3.66315	-159
chrV	210058	210720	2.87691	-157		chrVII	291552	292167	1.58143	-173		chrVII	61946	62435	3.22556	116		chrVII	718441	719144	2.86022	-100		chrVI	176030	176745	2.88836	3		chrXII	264932	265426	3.00986	-277
chrV	212942	213694	3.54301	-119		chrVII	295777	296233	3.57897	73		chrVII	63365	64067	3.48418	-96		chrVII	719592	720653	3.14927	-286		chrVI	183836	184993	2.84034	-87		chrXII	266625	267372	3.91457	-81
chrV	214507	215314	4.67921	-152		chrVII	299437	300268	4.95345	-125		chrVII	66734	67808	3.48227	-312		chrVII	726184	726584	3.21285	95		chrVI	191634	192119	2.79308	-860		chrXII	270447	271289	5	-140
chrV	227954	228784	2.64674	-82		chrVII	303128	304444	2.41595	273		chrVII	72861	73739	3.46538	-40		chrVII	729331	730166	2.88849	-78		chrVI	193871	195051	2.76358	-351		chrXII	273653	275093	2.53284	-458
chrV	229243	229958	3.15238	-120		chrVII	305989	306975	4.48151	-78		chrVII	74071	75197	3.35875	1294		chrVII	737835	738603	3.18816	-16		chrVI	203133	203792	2.89105	-30		chrXII	278310	279204	3.9189	-105
chrV	232248	232654	2.3116	-10		chrVII	309792	310610	3.56053	-28		chrVII	76735	77133	3.36858	40		chrVII	739293	739779	3.15036	-408		chrVI	204511	206121	2.85365	-566		chrXII	286326	287115	3.39322	-99
chrV	238537	239724	2.66754	643		chrVII	312883	313639	3.25476	27		chrVII	80993	81679	3.43642	-150		chrVII	749747	750662	3.1016	-114		chrVI	206749	208104	2.93908	-25		chrXII	301585	302604	5	-106
chrV	246405	246929	3.03064	-164		chrVII	314106	314988	3.80943	-84		chrVII	82075	82758	3.47173	43		chrVII	753715	754800	3.19134	-414		chrVI	209549	211134	2.86488	-274		chrXII	315702	316438	4.55745	-37
chrV	249559	250222	1.95041	-827		chrVII	319164	322098	3.37931	-1151		chrVII	84008	84951	3.50714	-223		chrVII	760903	761394	3.19897	-243		chrVI	219638	220623	2.95065	-25		chrXII	331778	332860	5	-204
chrV	254194	254945	4.41526	-86		chrVII	334382	335126	4.56925	-132		chrVII	90933	91744	3.43159	-92		chrVII	767223	767792	3.08739	79		chrVI	221955	222351	2.90416	-735		chrXII	336988	337623	4.3735	-41
chrV	270978	272739	2.69912	91		chrVII	337322	338092	3.97043	-199		chrVII	92221	92850	3.4424	24		chrVII	769970	770831	3.16278	-168		chrVI	226826	227261	2.93465	81		chrXII	345721	346857	2.53769	-296
chrV	286785	287281	1.37014	-119		chrVII	342812	343611	3.64489	-107		chrVII	93467	94059	3.39664	-29		chrVII	778013	778386	3.117	-2199		chrVI	228544	230167	2.66881	-24		chrXII	363540	364316	2.89304	-188
chrV	288936	289727	2.31243	-910		chrVII	346581	347461	4.32322	-98		chrVII	98750	99182	3.38879	-3		chrVII	781101	782133	2.89767	-150		chrVI	233318	234280	2.87544	-255		chrXII	377830	378294	2.88671	77
chrV	291239	292062	3.81787	-415		chrVII	349272	349963	3.11903	2		chrVII	107333	108517	3.46484	-233		chrVII	786644	787221	3.02378	-13		chrVI	238036	238837	2.94006	-21		chrXII	384184	384881	5	1
chrV	292401	293183	2.33226	-229		chrVII	352039	353316	3.68634	-380		chrVII	109824	111180	3.42664	1503		chrVII	792780	793487	3.16264	-81		chrVI	239320	240155	2.90746	89		chrXII	385171	385722	3.16488	-39
chrV	298275	299425	1.37825	-100		chrVII	355281	356068	2.40266	-152		chrVII	114451	115256	3.5201	-190		chrVII	794498	794866	2.98378	308		chrVI	241035	242608	2.93893	-176		chrXII	399255	399919	2.49955	-70
chrV	301179	302989	2.73655	243		chrVII	358007	359766	3.4306	251		chrVII	120679	122215	3.43781	-540		chrVII	800061	800648	3.17768	-191		chrVI	243728	244543	2.90244	23		chrXII	433434	434972	3.26756	260
chrV	307025	307877	3.2349	-202		chrVII	367966	368883	1.88084	-328		chrVII	130928	131775	3.48195	-173		chrVII	805690	806766	2.85197	-207		chrVI	244851	246468	2.95332	-486		chrXII	505491	506420	2.84883	-178
chrV	313307	314459	3.33425	-385		chrVII	371401	371738	1.46902	-208		chrVII	141450	141949	3.47377	26		chrVII	827217	827761	3.1891	-63		chrVI	248157	248616	2.80524	-136		chrXII	517417	518213	4.3796	-125
chrV	316336	316962	2.10858	-49		chrVII	374530	375469	5	-87		chrVII	143910	144259	3.29636	-723		chrVII	828965	829340	3.07299	37		chrVI	249646	250207	2.75962	-61		chrXII	523097	523879	3.36282	-144
chrV	319651	320144	1.82448	-65		chrVII	375783	376414	1.94648	-2		chrVII	153864	155084	3.35316	-168		chrVII	830119	830702	3.20861	-104		chrVI	251417	252729	2.91376	-270		chrXII	534156	534568	2.4763	31
chrV	325584	326347	2.82807	-30		chrVII	377149	378012	4.03086	-28		chrVII	156992	158133	3.48307	33		chrVII	832055	832707	3.18454	-75		chrVI	262716	263491	2.8822	-1100		chrXII	542941	544322	5	-328
chrV	326713	327505	4.04291	44		chrVII	380849	381857	3.13216	-82		chrVII	172848	173559	3.45673	-125		chrVII	836943	837385	3.14472	22		chrVII	27236	28111	2.95041	-190		chrXII	545470	546395	3.91239	-164
chrV	327746	328767	5	-117		chrVII	382843	383857	4.43632	-142		chrVII	173958	174976	3.52255	-78		chrVII	842314	842901	3.18697	-57		chrVII	29883	30863	2.94145	1263		chrXII	551674	552663	4.63238	-101
chrV	330223	330857	2.72196	-36		chrVII	388955	390276	4.19268	95		chrVII	180238	180994	3.48826	-84		chrVII	843333	844191	3.1684	-92		chrVII	31688	32248	2.87145	58		chrXII	559265	559927	3.8639	45
chrV	332440	333259	3.42497	-20		chrVII	391667	392363	3.67743	-208		chrVII	182103	182729	3.43219	26		chrVII	846149	846661	2.96728	0		chrVII	36786	37361	2.91195	141		chrXII	561484	562261	3.48949	-135
chrV	337555	338120	1.30151	-111		chrVII	393570	394196	3.02366	-103		chrVII	185845	186374	3.50154	51		chrVII	853179	853611	3.18486	-180		chrVII	38478	39392	2.83478	-88		chrXII	565899	566814	3.85983	-76
chrV	343405	343706	2.17068	701		chrVII	403606	404685	2.19166	459		chrVII	190776	191413	3.52834	-34		chrVII	854659	855323	3.20786	-96		chrVII	41111	41881	2.84244	-2		chrXII	581406	582043	4.31883	46
chrV	347399	348493	3.38109	-334		chrVII	416902	417727	3.53834	-168		chrVII	193052	193766	3.43961	-109		chrVII	867153	868052	3.01111	-83		chrVII	42948	43801	2.78909	68		chrXII	604551	605953	3.95679	-465
chrV	349183	350155	1.80952	-311		chrVII	418650	419144	3.56849	-11		chrVII	196097	197369	3.47462	-330		chrVII	871189	871938	3.04457	-148		chrVII	44975	45761	2.92622	-77		chrXII	609297	610269	3.96799	0
chrV	353325	354862	3.3352	-1046		chrVII	428488	428876	3.88361	81		chrVII	199939	200679	3.32181	-167		chrVII	874870	875643	3.20136	-148		chrVII	48263	48878	2.84007	-42		chrXII	614432	614948	2.27176	-65
chrV	358769	359691	3.88354	-169		chrVII	433964	435240	3.56369	-1023		chrVII	202370	202933	3.30703	-69		chrVII	885555	886161	2.92667	-117		chrVII	49186	49860	2.95594	-29		chrXII	617145	617733	2.64111	-94
chrV	361441	362329	3.07238	-91		chrVII	443072	443798	3.81029	-526		chrVII	206888	208991	3.43401	907		chrVII	888608	889084	3.20682	-36		chrVII	53118	53998	2.85	-30		chrXII	679709	680487	4.20913	-102
chrV	366616	367335	3.08831	174		chrVII	445799	446316	3.31473	85		chrVII	213637	214280	3.48921	-122		chrVII	891948	892407	3.19557	8		chrVII	55040	56771	2.93985	-110		chrXII	694115	694595	2.86163	-23
chrV	371722	373390	3.18479	230		chrVII	449639	450409	4.13148	-67		chrVII	215738	216600	3.26853	-73		chrVII	897171	897759	3.19065	-37		chrVII	58756	59342	2.91956	-73		chrXII	696598	697093	3.78709	-16
chrV	374360	374972	3.63011	-121		chrVII	451569	452770	5	-66		chrVII	217112	217812	3.42453	-62		chrVII	901890	903409	2.96421	-380		chrVII	61932	62657	2.89039	220		chrXII	706983	707742	4.4996	3
chrV	377408	378625	2.11654	-403		chrVII	457442	458402	4.2629	-52		chrVII	225595	226590	3.37022	-306		chrVII	910339	910643	3.10938	59		chrVII	63376	64141	2.88592	-139		chrXII	714596	715417	3.03295	-82
chrV	381884	382586	2.85302	-132		chrVII	459230	460235	4.6945	-69		chrVII	229370	230511	3.49458	-255		chrVII	911493	912074	3.1833	-99		chrVII	66529	67869	2.94611	-240		chrXII	751546	751950	3.34559	21
chrV	385938	386305	2.19463	-246		chrVII	461275	462393	2.99337	168		chrVII	234203	234945	3.46182	-67		chrVII	914649	915430	3.1876	-201		chrVII	69260	69880	2.87638	-101		chrXII	763857	765126	3.4084	-316
chrV	387048	387434	2.33471	9		chrVII	465589	466033	2.02541	-330		chrVII	237889	238489	3.18712	-70		chrVII	921497	922449	3.04984	-202		chrVII	72802	73769	2.85801	-54		chrXII	771459	772305	2.12215	-58
chrV	389848	390554	2.30912	-149		chrVII	490269	490947	2.55855	-61		chrVII	244896	245649	3.4806	-261		chrVII	924177	924946	3.19456	-100		chrVII	74037	75203	2.77311	1280		chrXII	777528	778214	4.58896	-7
chrV	393748	394402	2.99755	-363		chrVII	491588	492300	2.17487	12		chrVII	249290	250111	3.41585	-168		chrVII	931809	932408	3.18213	-432		chrVII	76739	77126	2.89595	39		chrXII	778717	779437	2.3156	-125
chrV	394937	395558	1.32359	-381		chrVII	493981	494779	3.37496	-137		chrVII	265730	266346	3.43871	-107		chrVII	936545	937400	3.03711	-90		chrVII	80972	81662	2.7867	-131		chrXII	808512	809064	3.32457	-1209
chrV	395954	396364	2.73585	13		chrVII	497781	498415	1.8128	-64		chrVII	283671	284642	3.52032	-220		chrVII	939745	940184	3.18879	42		chrVII	82042	82788	2.92553	41		chrXII	841086	841611	4.11702	18
chrV	398909	399592	3.2679	-196		chrVII	499615	500381	3.64406	-92		chrVII	285978	288549	2.14907	1187		chrVII	944506	945173	2.97059	-305		chrVII	83953	85021	2.9217	-230		chrXII	852875	853677	4.58192	-125
chrV	400558	401411	3.02991	-143		chrVII	502599	503217	2.7824	-30		chrVII	295733	296177	3.48362	23		chrVII	947066	947628	3.16455	-73		chrVII	90791	91782	2.60831	-40		chrXII	862043	862654	3.29088	-95
chrV	401828	402679	2.84771	-121		chrVII	505615	507188	3.65403	332		chrVII	299460	300280	3.29226	-108		chrVII	953244	954240	3.19035	-218		chrVII	92188	92854	2.78846	9		chrXII	870987	871792	4.19807	-23
chrV	404081	404881	3.97839	-129		chrVII	512680	513778	4.11001	70		chrVII	303148	304328	3.33001	225		chrVII	961831	963137	3.2018	333		chrVII	93431	94081	2.88024	-36		chrXII	873639	874157	3.58186	-344
chrV	408724	409976	4.73475	-287		chrVII	514080	514969	3.50693	-29		chrVII	305976	306916	3.37878	-114		chrVII	965521	965865	3.20091	-38		chrVII	97038	97620	2.83678	-9		chrXII	877375	878326	2.78325	-431
chrV	413922	414836	3.88502	-102		chrVII	521676	522525	3.18472	-25		chrVII	309927	310694	3.41861	-138		chrVII	981810	982603	3.13662	-139		chrVII	98762	99210	2.92222	17		chrXII	892499	893960	4.81489	160
chrV	415495	416992	3.26613	385		chrVII	523072	523951	3.70499	-275		chrVII	312870	313475	3.3846	-61		chrVII	983871	985037	3.14342	-182		chrVII	107305	108668	2.9295	-171		chrXII	918716	919188	2.76215	67
chrV	430521	431036	2.26829	-330		chrVII	527144	528337	2.48363	109		chrVII	314098	314998	3.40096	-83		chrVII	995124	995932	3.11933	-111		chrVII	109985	111181	2.35769	1422		chrXII	933506	934777	3.66716	111
chrV	431935	432605	2.45782	-225		chrVII	532331	533113	4.07639	83		chrVII	319182	322097	3.24537	-1142		chrVII	996181	997139	3.17796	-209		chrVII	114344	115257	2.95444	-137		chrXII	936955	937741	4.16208	-115
chrV	435285	436749	2.46013	-1174		chrVII	542079	542494	3.43723	84		chrVII	334376	335099	3.53439	-148		chrVII	1007138	1007671	3.13107	-100		chrVII	120676	122155	2.81731	-509		chrXII	947227	948613	3.28318	-448
chrV	441467	441968	3.04031	101		chrVII	558716	559417	2.80655	-199		chrVII	337346	338080	3.53215	-193		chrVII	1010476	1010913	3.19266	71		chrVII	123014	124839	2.93995	115		chrXII	965363	966099	2.60545	-166
chrV	451132	451741	2.42375	-128		chrVII	578996	579742	4.04384	-107		chrVII	342822	343550	3.51199	-133		chrVII	1016489	1017162	3.10352	-76		chrVII	130969	131867	2.74091	-107		chrXII	986830	988505	3.64108	606
chrV	452940	453455	2.17546	-261		chrVII	584686	585017	2.52893	-43		chrVII	346664	347474	3.51235	-50		chrVII	1017515	1018559	3.19634	-278		chrVII	141369	141968	2.89079	57		chrXII	992999	993439	3.18161	-215
chrV	462428	462857	2.34036	58		chrVII	595380	596028	3.45381	133		chrVII	349245	349889	3.08804	-49		chrVII	1018956	1019376	3.17671	75		chrVII	143903	144455	2.86235	-629		chrXII	1013872	1014769	4.93298	-143
chrV	464556	465292	4.03911	-82		chrVII	605272	606565	4.05323	-217		chrVII	352066	353283	3.47216	-377		chrVII	1021677	1022850	3.21265	-392		chrVII	153791	154519	2.84925	151		chrXII	1027629	1028129	3.65315	14
chrV	467210	467874	3.24094	-72		chrVII	616984	618303	4.45554	23		chrVII	357064	359737	3.32907	-235		chrVII	1025696	1027488	3.14629	-44		chrVII	157253	158173	2.94968	-117		chrXII	1030414	1031084	2.64771	-85
chrV	468664	469279	1.36524	602		chrVII	619634	620818	2.56034	-368		chrVII	357064	359737	3.32907	-235		chrVII	1031599	1032011	3.17595	14		chrVII	172776	173536	2.95215	-77		chrXII	1032290	1032868	4.17304	-48
chrV	472236	472666	2.73097	-27		chrVII	621474	624760	3.73587	-1318		chrVII	364201	364641	3.42251	-505		chrVII	1038235	1038912	3.14495	-73		chrVII	174018	174960	2.89484	-56		chrXII	1042688	1043234	3.72216	25
chrV	473775	475284	2.50314	275		chrVII	626787	627482	4.13338	-51		chrVII	366686	367144	3.53428	-919		chrVII	1042806	1043526	3.1104	-71		chrVII	180209	181172	2.86722	-9		chrXII	1074468	1075059	3.92546	2256
chrV	482735	483523	2.39344	-281		chrVII	633829	634607	4.38343	-86		chrVII	367948	368841	3.35761	-307		chrVII	1045211	1045832	3.00954	-42		chrVII	182058	183273	2.91183	276		chrXIII	3149	3893	3.13146	1163
chrV	484083	485024	3.6141	-213		chrVII	635348	635987	2.85591	-44		chrVII	374538	375390	3.4327	-123		chrVII	1046259	1046989	3.205	-63		chrVII	185846	186450	2.95498	89		chrXIII	14411	15020	3.83131	37
chrV	487026	487837	3.19213	2644		chrVII	636525	637967	4.0625	331		chrVII	377084	377837	3.49062	-148		chrVII	1051402	1052052	3.00347	-2		chrVII	190885	191407	2.78361	17		chrXIII	23280	24190	5	-52
chrV	488171	488883	1.65185	2051		chrVII	639174	639831	4.26077	10		chrVII	381060	382271	3.3167	-395		chrVII	1059845	1060411	3.18716	-88		chrVII	192903	193670	2.92188	13		chrXIII	41582	42333	3.0764	-164
chrV	500161	500869	2.36191	-167		chrVII	640097	640525	3.87262	60		chrVII	382882	383833	3.46307	-150		chrVII	1061481	1062095	3.14141	-198		chrVII	196007	197125	2.91076	-163		chrXIII	43210	44384	5	-222
chrV	502636	503251	2.19175	-50		chrVII	641582	642354	4.05042	-42		chrVII	388912	390222	3.49435	144		chrVII	1062811	1063309	3.14198	93		chrVII	199882	200666	2.8697	-132		chrXIII	44617	45320	3.28703	-94
chrV	512177	512702	1.74581	-304		chrVII	643439	644332	4.02437	-106		chrVII	391701	392404	3.49521	-170		chrVII	1075889	1076367	3.12029	-315		chrVII	202425	203025	2.74924	4		chrXIII	55919	56666	3.40273	-24
chrV	522310	523313	4.56016	-143		chrVII	646544	647276	3.92363	-95		chrVII	393603	394221	3.4853	-74		chrVII	1077387	1078896	3.20287	1543		chrVII	213762	214522	2.86526	61		chrXIII	58387	59127	3.90791	-70
chrV	525596	527589	2.402	-489		chrVII	647751	648324	4.45254	104		chrVII	416931	417725	3.53601	-155		chrVII	1084686	1084953	3.15982	-44		chrVII	215663	216690	2.94758	-81		chrXIII	67284	68597	3.31515	-353
chrV	535814	536615	3.66585	-85		chrVII	675957	677404	3.35332	60		chrVII	418558	419083	3.39789	-4		chrVII	1087125	1087761	3.07708	2002		chrVII	217131	217963	2.75719	23		chrXIII	81890	83399	2.79377	-25
chrV	541212	541872	2.86277	-148		chrVII	687353	688221	4.32684	-112		chrVII	420490	423010	3.46458	-1195		chrVIII	3016	3693	3.17462	-44		chrVII	225492	226607	2.9025	-349		chrXIII	99015	99969	3.78918	3
chrV	548904	549598	2.28391	830		chrVII	689670	690397	3.4875	-211		chrVII	428461	428845	3.48434	52		chrVIII	4703	5133	3.15686	-377		chrVII	229390	230638	2.93288	-229		chrXIII	101615	102346	4.42828	119
chrV	550890	551236	2.5101	59		chrVII	692966	693753	2.8917	-3		chrVII	433908	437235	2.30883	-53		chrVIII	10529	12188	2.98322	926		chrVII	234019	234941	2.91559	27		chrXIII	103545	104986	4.78021	-104
chrV	552123	552800	2.58148	-63		chrVII	694662	695708	4.29163	-50		chrVII	433908	437235	2.30883	-53		chrVIII	13334	13815	2.95217	10		chrVII	237878	238458	2.90836	-49		chrXIII	108415	109144	3.73869	-26
chrV	553658	554358	2.76402	-39		chrVII	697901	698868	4.10909	-17		chrVII	439687	440511	2.85475	36		chrVIII	25258	25704	3.20665	28		chrVII	244875	245684	2.84537	-268		chrXIII	135249	135757	4.12854	3
chrV	558438	561780	2.96974	655		chrVII	699513	700282	4.31959	-112		chrVII	443098	443789	3.53479	-535		chrVIII	38165	39693	3.01749	-145		chrVII	249585	250247	2.67211	47		chrXIII	141774	142496	3.62475	-75
chrV	558438	561780	2.96974	655		chrVII	701373	702702	3.17231	-629		chrVII	445841	446331	3.32395	57		chrVIII	62291	63134	3.09997	-150		chrVII	253615	254109	2.83998	-3		chrXIII	148480	149146	2.81273	-130
chrV	562345	569565	2.81253	-275		chrVII	708862	709853	4.98173	1748		chrVII	448286	448953	3.38394	-85		chrVIII	69344	70531	3.19168	230		chrVII	257080	257683	2.81883	-325		chrXIII	164054	165171	3.65514	-177
chrV	573030	573691	4.38483	1881		chrVII	713193	714120	3.2194	-52		chrVII	449685	450185	3.52643	22		chrVIII	76934	77654	3.19527	20		chrVII	265724	266392	2.92026	-87		chrXIII	177777	178722	4.3705	55
chrVI	2294	4362	4.03533	10		chrVII	715388	715993	2.62421	-137		chrVII	451801	452733	2.79015	-137		chrVIII	78070	78509	3.16364	63		chrVII	268806	270302	2.90622	-479		chrXIII	181230	181736	3.79938	9
chrVI	10189	11928	3.08069	-90		chrVII	716959	717640	3.07723	-58		chrVII	457626	458373	3.44948	-130		chrVIII	81408	82090	3.17441	-133		chrVII	270545	271257	2.89013	-96		chrXIII	191424	192089	3.58996	10
chrVI	12174	13961	3.9049	139		chrVII	718497	719195	4.77912	-47		chrVII	459318	460143	3.366	-67		chrVIII	83518	84122	3.14254	-99		chrVII	283660	284710	2.94631	-248		chrXIII	195509	195954	3.15857	23
chrVI	22683	23321	2.20605	-215		chrVII	719588	720629	3.96213	-300		chrVII	461168	461967	3.48642	-98		chrVIII	101769	102855	3.18959	-300		chrVII	295729	296218	2.95206	42		chrXIII	203879	204673	5	-173
chrVI	26992	30376	3.29696	452		chrVII	726153	726547	3.74775	129		chrVII	465403	466014	3.36036	-274		chrVIII	131167	131726	3.1996	-1		chrVII	299381	300595	2.8042	10		chrXIII	213770	214554	5	-27
chrVI	36239	37052	2.8872	-157		chrVII	729403	730202	4.79453	-132		chrVII	472095	473124	3.49895	-245		chrVIII	138387	139016	3.20607	8		chrVII	303851	304451	2.86258	-80		chrXIII	215885	216763	3.80531	-111
chrVI	39913	40731	4.40476	-99		chrVII	737802	738576	3.5208	14		chrVII	475074	475850	3.23371	-83		chrVIII	143264	144223	3.12804	-186		chrVII	305904	306992	2.80871	-112		chrXIII	224967	225619	3.67122	72
chrVI	42585	43118	3.37335	37		chrVII	739314	740008	3.03557	-283		chrVII	491696	492316	3.17768	-50		chrVIII	158917	159779	3.11729	-90		chrVII	307327	307767	2.79796	110		chrXIII	233084	233781	1.84516	-24
chrVI	47513	48182	2.55413	-104		chrVII	749749	750783	3.75114	-134		chrVII	493950	494700	3.43622	-151		chrVIII	160309	161113	2.86304	-133		chrVII	309789	310631	2.93954	-37		chrXIII	236390	236836	3.38562	25
chrVI	48776	49417	2.89088	-42		chrVII	760810	761522	3.97784	-226		chrVII	497810	498424	3.33868	-83		chrVIII	172607	173496	3.20147	-82		chrVII	312889	313518	2.94805	-30		chrXIII	241647	242307	3.52102	-441
chrVI	52434	53038	1.46707	1386		chrVII	767033	767761	4.32805	-32		chrVII	499629	500400	3.49427	-109		chrVIII	177649	178511	3.1275	-81		chrVII	314144	315189	2.9274	36		chrXIII	247319	248017	4.07976	-9
chrVI	55764	56672	4.59203	-118		chrVII	770015	770841	2.80788	-141		chrVII	502480	503238	3.22931	-79		chrVIII	179745	180603	3.11332	-171		chrVII	319212	322185	2.3314	-1083		chrXIII	251216	251951	3.31144	-68
chrVI	58108	58799	3.01003	-328		chrVII	780115	782090	4.28479	-664		chrVII	505626	507135	3.48897	311		chrVIII	187488	188349	2.99109	-5		chrVII	319212	322185	2.3314	-1083		chrXIII	275823	276270	2.83416	2
chrVI	63728	64428	3.88652	-85		chrVII	786666	787200	4.31009	-13		chrVII	510771	511907	3.47182	-206		chrVIII	188848	190694	3.19329	93		chrVII	330347	331038	2.8292	-86		chrXIII	284329	285048	2.77904	-411
chrVI	64860	65521	1.8586	-259		chrVII	792782	793505	3.68715	-91		chrVII	512659	513530	3.43861	-64		chrVIII	194720	195720	3.20212	-331		chrVII	334286	335193	2.89445	-146		chrXIII	296572	296920	2.04497	-8
chrVI	78888	79507	2.84999	-37		chrVII	794541	794865	2.5657	287		chrVII	514108	514793	3.46645	-103		chrVIII	198158	198885	3.13545	-237		chrVII	337345	338149	2.82419	-159		chrXIII	298657	299045	2.87825	-17
chrVI	79950	80628	2.57864	-76		chrVII	800070	800662	3.0334	-180		chrVII	521726	522531	3.27219	-53		chrVIII	212401	213219	2.27235	-90		chrVII	342839	343523	2.90434	-138		chrXIII	311801	312568	3.1795	29
chrVI	81555	82352	4.19202	-42		chrVII	805724	806662	4.53524	-172		chrVII	523144	523876	3.3918	-277		chrVIII	214110	215235	1.92812	45		chrVII	346721	347649	2.79783	66		chrXIII	318123	318993	4.19255	-122
chrVI	86999	87570	3.33806	-51		chrVII	827216	827795	3.74268	-46		chrVII	532310	533041	3.34418	37		chrVIII	218836	219191	3.11512	-171		chrVII	349221	349950	2.94949	-30		chrXIII	321561	322230	4.45581	21
chrVI	90848	91273	3.2556	75		chrVII	828972	829391	3.54305	66		chrVII	543383	544553	3.38708	415		chrVIII	219772	221012	3.20191	284		chrVII	352019	353780	2.92817	-158		chrXIII	337419	338081	3.62066	-38
chrVI	97689	98900	3.13407	1304		chrVII	830046	830709	3.76535	-137		chrVII	545890	546600	3.03442	-88		chrVIII	223439	224055	2.98211	11		chrVII	355246	356035	2.8296	-186		chrXIII	343296	344029	3.45239	-143
chrVI	99760	101330	2.30664	60		chrVII	832016	832736	4.39373	-80		chrVII	558706	559403	3.31508	-187		chrVIII	226827	227346	3.00747	54		chrVII	358023	359796	2.93924	274		chrXIII	366370	367178	4.59617	-69
chrVI	103030	104557	2.40123	95		chrVII	834314	836049	3.57654	-700		chrVII	578996	579708	3.51035	-124		chrVIII	228667	229685	2.76777	-139		chrVII	364209	364606	2.83404	-492		chrXIII	370203	370682	3.30583	74
chrVI	109691	113105	4.35736	751		chrVII	836994	837377	3.25386	44		chrVII	580936	581813	3.35907	61		chrVIII	234269	235123	3.0664	-38		chrVII	366728	367093	2.7992	-915		chrXIII	392251	393114	5	-72
chrVI	113530	114896	2.48242	-777		chrVII	842255	842980	3.2872	-67		chrVII	595498	596090	3.51007	43		chrVIII	235867	236158	2.84517	499		chrVII	367924	368821	2.82649	-285		chrXIII	411119	411825	1.87069	-97
chrVI	115557	116250	2.17451	-161		chrVII	843360	844185	3.82469	-81		chrVII	596403	596731	3.34011	-126		chrVIII	241491	241848	3.04935	6		chrVII	374468	376297	2.80016	131		chrXIII	412558	413632	3.98904	-222
chrVI	118565	119727	5	-283		chrVII	846009	846685	2.96927	58		chrVII	605274	606433	3.49791	-282		chrVIII	242092	242718	3.20546	-177		chrVII	377226	378087	2.93293	48		chrXIII	424447	425246	2.74332	-119
chrVI	122852	123573	2.48166	-266		chrVII	853128	853757	3.49555	-228		chrVII	606923	609169	3.49576	483		chrVIII	245957	246473	3.14535	22		chrVII	380729	382393	2.90681	-290		chrXIII	429399	430451	3.06612	-298
chrVI	129737	130464	2.8747	-233		chrVII	854514	855255	3.87433	10		chrVII	615784	616425	3.30594	-140		chrVIII	250610	251449	3.14077	-71		chrVII	382808	383865	2.86625	-129		chrXIII	451076	451572	3.25545	41
chrVI	131222	131973	2.02937	-212		chrVII	867187	868051	4.69672	-99		chrVII	616995	618362	3.481	58		chrVIII	255528	256550	3.19243	-283		chrVII	389000	390314	2.93591	54		chrXIII	453374	454402	4.83225	-127
chrVI	134480	134980	2.27696	2427		chrVII	871218	872046	3.87177	-216		chrVII	619608	620706	3.28609	-299		chrVIII	267333	267727	3.08639	-8		chrVII	391688	392347	2.88545	-205		chrXIII	497224	497855	3.43697	-91
chrVI	135387	136395	3.32568	1266		chrVII	888620	889062	3.48263	-41		chrVII	621430	625251	3.5154	1445		chrVIII	272343	272918	3.12133	4		chrVII	393750	394220	2.85142	-1		chrXIII	501685	502465	2.79798	-184
chrVI	143926	144965	1.99499	2488		chrVII	891961	892579	3.54383	-84		chrVII	626804	627463	3.48299	-50		chrVIII	273723	274220	3.06231	-202		chrVII	416920	417773	2.83732	-136		chrXIII	517249	517789	4.95149	-20
chrVI	146582	147454	3.43184	-84		chrVII	897073	897879	3.67824	-26		chrVII	633869	634548	3.31006	-95		chrVIII	277502	278287	3.10845	-258		chrVII	418595	419085	2.81707	15		chrXIII	523222	523919	2.71408	-125
chrVI	148675	150333	3.78663	394		chrVII	901849	903373	3.59852	-341		chrVII	635339	635981	3.52904	-52		chrVIII	281089	281855	3.20424	-23		chrVII	420766	422873	2.92851	-1265		chrXIII	527205	528155	5	-124
chrVI	155606	156417	2.4462	-133		chrVII	910286	910676	3.58059	49		chrVII	636624	637975	3.51491	277		chrVIII	283016	283501	3.18004	39		chrVII	428495	428823	2.85809	58		chrXIII	547475	547949	2.61879	-2
chrVI	160051	160820	2.4051	-99		chrVII	911420	912164	3.30675	-91		chrVII	639221	640938	3.45589	291		chrVIII	284280	285015	3.03693	-23		chrVII	433892	435053	2.85761	-894		chrXIII	564059	564767	3.92766	-22
chrVI	161694	162702	2.63246	-290		chrVII	921489	922471	4.20928	-195		chrVII	641491	642320	3.40563	-104		chrVIII	286370	287236	3.11621	-33		chrVII	435825	436823	2.91735	509		chrXIII	571772	572512	3.82732	-98
chrVI	167030	167367	2.50158	59		chrVII	924147	924987	3.41232	-105		chrVII	643479	644316	3.3496	-118		chrVIII	301708	302142	3.17692	9		chrVII	442376	443798	2.8596	-178		chrXIII	574655	575314	3.25949	-57
chrVI	167764	170176	3.94445	-254		chrVII	931745	932400	2.29894	-468		chrVII	646534	647192	3.50217	-48		chrVIII	302580	302953	3.20169	6		chrVII	445793	446330	2.90005	81		chrXIII	583759	584596	2.77272	-257
chrVI	173166	174469	2.47709	59		chrVII	936575	937486	4.3208	-148		chrVII	647782	648452	3.37768	25		chrVIII	314362	315237	3.15204	-127		chrVII	448302	448757	2.73339	5		chrXIII	592503	593227	4.13135	-237
chrVI	175572	176784	2.98635	213		chrVII	939820	940215	3.52562	95		chrVII	651521	653648	3.42304	396		chrVIII	315675	316727	3.03192	-233		chrVII	449640	450189	2.75136	42		chrXIII	605914	606425	3.21859	189
chrVI	180552	181680	2.20225	-373		chrVII	944416	945294	2.9782	-290		chrVII	666031	666540	3.44643	-55		chrVIII	327803	328573	3.12612	-115		chrVII	451678	452961	2.62133	-84		chrXIII	618257	618751	3.48369	25
chrVI	183813	184723	3.6084	-46		chrVII	947075	947634	4.27042	-65		chrVII	669868	670616	3.24207	-146		chrVIII	341074	342646	3.17928	195		chrVII	457359	458472	2.79048	-46		chrXIII	627508	628483	4.4313	-188
chrVI	191254	192391	1.95867	-914		chrVII	953191	954322	4.44514	-203		chrVII	676041	677539	3.51484	169		chrVIII	345292	346189	3.12658	-113		chrVII	459206	460529	2.7142	14		chrXIII	628876	629368	2.82352	97
chrVI	193855	195027	4.18753	-371		chrVII	961821	963278	3.73165	267		chrVII	687362	688170	3.45383	-133		chrVIII	349308	350041	3.10447	101		chrVII	461187	462317	2.93167	86		chrXIII	644996	645804	4.08537	-142
chrVI	199637	201543	1.44792	716		chrVII	965455	965852	3.44719	1		chrVII	689674	690380	3.34206	-218		chrVIII	360400	361197	3.15628	-114		chrVII	465567	466136	2.93399	-289		chrXIII	658912	659664	2.32466	-90
chrVI	204521	206266	2.56362	-644		chrVII	981805	982556	4.03639	-113		chrVII	692984	693520	3.27356	-111		chrVIII	363944	364749	3.05145	-194		chrVII	471908	473116	2.84494	-214		chrXIII	667440	668822	4.46203	-361
chrVI	206992	208069	3.64893	79		chrVII	983844	985199	4.42494	-250		chrVII	694844	695768	3.31928	-111		chrVIII	371411	372001	3.0943	-43		chrVII	475054	475821	2.77867	-107		chrXIII	671133	671514	2.43072	1
chrVI	219839	220689	3.02325	-158		chrVII	990277	990761	3.15485	2470		chrVII	697949	698873	3.48634	-43		chrVIII	374077	374948	2.69598	-203		chrVII	490291	490899	2.83058	-48		chrXIII	676185	677067	3.48177	730
chrVI	225786	226535	2.48547	139		chrVII	1007076	1007697	3.71903	-82		chrVII	699546	700314	3.36243	-144		chrVIII	377562	378191	3.16476	-178		chrVII	493914	494704	2.93818	-135		chrXIII	683671	684716	4.67658	-273
chrVI	226838	227218	2.72473	65		chrVII	1010367	1010892	3.26743	136		chrVII	701379	702711	3.33668	-622		chrVIII	380548	381690	3.10606	547		chrVII	497789	498376	2.92136	-49		chrXIII	686986	687664	3.94553	-41
chrVI	228876	229797	4.80948	-43		chrVII	1016494	1019365	3.24667	-171		chrVII	708956	709780	3.19266	1758		chrVIII	386725	387562	2.95706	-89		chrVII	499608	500377	2.92679	-87		chrXIII	694885	695668	4.26948	-73
chrVI	233365	234195	2.32817	-236		chrVII	1021716	1022906	3.58628	-345		chrVII	712675	713963	3.49255	-390		chrVIII	389777	390492	3.20951	-165		chrVII	502565	503224	2.8705	-43		chrXIII	706570	707377	3.88001	-87
chrVI	238022	238725	3.57309	-84		chrVII	1025711	1027537	3.47609	-12		chrVII	716974	717561	3.24734	-90		chrVIII	393020	393870	2.87473	-89		chrVII	505619	507156	2.79727	318		chrXIII	715137	716606	4.99151	-427
chrVI	239400	240148	2.81988	53		chrVII	1031452	1032089	2.86105	-20		chrVII	718472	719126	3.35728	-94		chrVIII	397026	397639	3.13965	82		chrVII	510740	511934	2.92096	-208		chrXIII	720422	720860	3.10781	12
chrVI	241150	242305	3.52758	-270		chrVII	1038266	1039063	2.98359	-164		chrVII	719582	720630	3.38866	-303		chrVIII	400589	401366	3.07625	-130		chrVII	512706	513715	2.91381	52		chrXIII	724149	724758	3.69382	-69
chrVI	243182	244425	2.32321	355		chrVII	1042807	1043544	4.57988	-81		chrVII	726163	726607	3.38958	94		chrVIII	406501	407329	3.16406	-188		chrVII	514135	514973	2.821	0		chrXIII	730715	731518	5	6
chrVI	244921	246377	3.10137	-483		chrVII	1045087	1045946	3.22407	-37		chrVII	729369	730184	3.42985	-106		chrVIII	417007	417850	3.16962	-120		chrVII	521616	522545	2.8022	-5		chrXIII	738932	739516	4.60317	39
chrVI	248224	248607	1.43678	-107		chrVII	1046205	1047042	4.28029	-63		chrVII	737877	738678	3.51951	-75		chrVIII	436845	437508	3.04622	-229		chrVII	523116	523926	2.94846	-266		chrXIII	742372	744030	4.38271	230
chrVI	251516	252673	3.62782	-292		chrVII	1051375	1052153	4.87704	-39		chrVII	739298	740012	3.22632	-289		chrVIII	438832	439651	3.11894	-100		chrVII	527151	527792	2.80247	-143		chrXIII	782148	782521	2.19079	-304
chrVI	256381	257434	1.92762	-1859		chrVII	1059816	1060393	3.63319	-65		chrVII	749732	750682	3.51	-116		chrVIII	440014	440685	3.20158	-27		chrVII	532253	533110	2.86632	43		chrXIII	784157	784861	3.98427	-228
chrVI	265797	266940	3.19536	-2044		chrVII	1062858	1063289	3.13116	79		chrVII	753754	755222	3.48778	-238		chrVIII	441737	442445	3.1837	-90		chrVII	542063	542473	2.73967	65		chrXIII	803865	804697	3.46602	-59
chrVII	9647	10661	1.41934	-956		chrVII	1064699	1067676	3.49474	-1248		chrVII	756269	757927	3.44995	202		chrVIII	443181	444135	2.94299	-170		chrVII	545910	546555	2.91004	-76		chrXIII	813949	814717	2.54012	-353
chrVII	27281	28046	3.14917	-180		chrVII	1072381	1073400	3.67178	-2591		chrVII	760859	761536	3.47884	-194		chrVIII	447918	448524	3.19053	-114		chrVII	558673	559423	2.76335	-180		chrXIII	818276	818994	4.02646	-54
chrVII	29956	30931	2.31741	1192		chrVII	1075815	1078999	3.94044	808		chrVII	767019	767836	3.3253	-1		chrVIII	456351	456814	3.18609	-8		chrVII	578976	579854	2.68896	-61		chrXIII	819843	820567	4.27777	-51
chrVII	31507	32205	3.42596	-54		chrVII	1087113	1087977	4.41797	1900		chrVII	769977	770783	3.37726	-189		chrVIII	480448	481273	3.05524	-129		chrVII	580965	581798	2.76878	54		chrXIII	834840	835495	4.02393	-70
chrVII	36732	37375	3.39172	121		chrVIII	3006	4029	3.26926	-207		chrVII	778004	778438	3.36004	-2178		chrVIII	483566	484807	3.21103	159		chrVII	589026	589895	2.82801	8		chrXIII	841283	842241	4.78587	-71
chrVII	38515	39329	4.44838	-101		chrVIII	10185	12225	4.70599	-992		chrVII	780072	782202	2.56862	-630		chrVIII	486407	487053	2.94656	-96		chrVII	593570	594687	2.84443	533		chrXIII	845119	845811	3.05569	-106
chrVII	41121	41764	3.91414	-55		chrVIII	13180	14292	1.44426	171		chrVII	786688	787274	3.49215	-61		chrVIII	487970	488931	2.99571	-206		chrVII	595163	596097	2.94704	207		chrXIII	848410	848978	3.08879	9
chrVII	42988	43673	3.0769	24		chrVIII	25128	25690	3.99742	100		chrVII	792804	793475	3.5142	-87		chrVIII	490307	490795	3.1992	-196		chrVII	596411	596735	2.88704	-120		chrXIII	854590	855111	3.66918	56
chrVII	45017	45673	2.4748	-100		chrVIII	33928	34616	2.88543	-195		chrVII	794485	794908	3.4412	293		chrVIII	491665	492249	2.21888	26		chrVII	605255	606577	2.89438	-220		chrXIII	872404	873277	4.39873	-216
chrVII	49137	49752	2.51313	-107		chrVIII	38032	39699	3.76201	-208		chrVII	795316	796500	3.49722	-184		chrVIII	493388	494190	3.14383	-107		chrVII	606928	607322	2.88711	-438		chrXIII	874012	875146	3.55315	-242
chrVII	53195	54072	3.29604	-106		chrVIII	62297	63202	4.45857	-187		chrVII	800047	800663	3.45977	-191		chrVIII	500960	501566	3.21084	-120		chrVII	615670	616424	2.93114	-82		chrXIII	895163	895702	3.36662	-7
chrVII	54974	56676	2.55559	-29		chrVIII	69130	70510	3.69684	112		chrVII	805721	806787	3.45496	-233		chrVIII	502122	502744	3.20535	45		chrVII	617053	618437	2.70361	79		chrXIII	896424	896938	3.90568	-12
chrVII	58743	59324	2.95164	-88		chrVIII	76830	78627	1.99323	-415		chrVII	811006	811361	3.41762	-554		chrVIII	506019	506565	3.19954	-27		chrVII	619555	620749	2.83533	-294		chrXIII	897331	897786	2.94271	44
chrVII	61873	62632	1.80683	178		chrVIII	83450	84177	2.08438	-93		chrVII	827173	827751	3.4907	-90		chrVIII	512325	512715	3.17062	-212		chrVII	621205	625254	2.95394	-1431		chrXIV	3066	4084	2.7706	2058
chrVII	63391	64087	2.5222	-119		chrVIII	84839	85244	2.90791	18		chrVII	828967	829353	3.37066	44		chrVIII	516249	517732	3.21232	-506		chrVII	626744	627514	2.93124	-45		chrXIV	18991	19770	3.91674	-79
chrVII	66661	67823	3.05293	-283		chrVIII	97821	98106	1.36804	-27		chrVII	830060	830704	3.509	-133		chrVIII	528996	529795	2.86583	4004		chrVII	633755	634653	2.63847	-100		chrXIV	31224	32178	2.61213	-243
chrVII	69310	69825	2.38725	-103		chrVIII	98380	99396	3.26652	-93		chrVII	831983	832654	3.4096	-137		chrVIII	534354	534973	3.12537	3430		chrVII	635253	636070	2.93742	-50		chrXIV	33924	35003	4.56097	-229
chrVII	72876	73710	4.07809	-47		chrVIII	101760	102910	4.07362	-277		chrVII	836962	837351	3.47796	15		chrVIII	543175	543645	3.1003	402		chrVII	636529	638044	2.90036	290		chrXIV	37422	37949	3.31702	-14
chrVII	74082	75211	2.023	1307		chrVIII	111031	111396	1.84677	103		chrVII	842295	842967	3.31849	-80		chrVIII	551155	552222	3.13435	-190		chrVII	639114	640559	2.81825	-324		chrXIV	47639	48509	5	-52
chrVII	76735	77138	2.5207	43		chrVIII	131074	131837	3.72405	-10		chrVII	843363	844152	3.51937	-96		chrVIII	553625	554033	3.09407	-567		chrVII	641645	642378	2.95575	2		chrXIV	52147	52992	2.81917	-92
chrVII	80989	81644	2.88427	-131		chrVIII	132610	132972	3.27291	744		chrVII	849212	850028	3.39589	816		chrVIII	558570	559399	2.97384	-947		chrVII	643405	644372	2.93044	-109		chrXIV	55577	56100	4.38903	58
chrVII	82079	82747	3.40626	39		chrVIII	138112	139055	2.91772	-110		chrVII	850438	851175	3.23691	-371		chrIX	3610	4308	2.79865	2188		chrVII	646507	647272	2.83624	-75		chrXIV	57381	58486	4.28057	-221
chrVII	84004	84933	3.60953	-212		chrVIII	143159	144170	3.81794	-107		chrVII	853202	853786	3.41395	-279		chrIX	15656	16804	3.01604	-2030		chrVII	647684	648378	2.85897	111		chrXIV	66099	66905	3.81131	-15
chrVII	90942	91752	4.56476	-85		chrVIII	158895	159782	3.97692	-99		chrVII	854654	855367	3.4042	-116		chrIX	32704	33181	3.16761	-377		chrVII	651527	653621	2.87006	407		chrXIV	76286	77113	4.08255	-117
chrVII	92175	92855	3.19699	3		chrVIII	160313	161053	4.71073	-161		chrVII	857568	858534	3.29397	-236		chrIX	37271	37842	3.16947	172		chrVII	656172	657202	2.94109	-273		chrXIV	85583	86481	3.46406	-186
chrVII	93421	94122	2.16302	-20		chrVIII	172520	173480	4.25761	-30		chrVII	867217	868025	3.46084	-101		chrIX	39081	39776	3.19703	-4		chrVII	666069	666639	2.91346	13		chrXIV	90008	90494	3.44082	-52
chrVII	97040	97618	1.6075	-9		chrVIII	177571	178465	3.57009	-19		chrVII	871151	872044	3.52989	-182		chrIX	41439	42113	3.1855	-49		chrVII	669969	670662	2.84866	-72		chrXIV	91608	92105	2.40579	-137
chrVII	98530	99143	2.21079	-132		chrVIII	179777	180882	4.35489	-15		chrVII	874508	875746	3.47539	-18		chrIX	47311	48385	3.18512	158		chrVII	675958	677291	2.85921	4		chrXIV	118727	119603	2.96545	-103
chrVII	107307	108521	4.16345	-244		chrVIII	192914	194013	2.33681	81		chrVII	885566	886191	3.38525	-138		chrIX	53521	54080	3.0708	-93		chrVII	687228	688277	2.844	-146		chrXIV	122510	123161	3.19208	-47
chrVII	109754	111194	3.44776	1531		chrVIII	194435	195750	3.89282	-285		chrVII	888521	889066	3.47292	-88		chrIX	54778	55494	3.21378	-62		chrVII	689639	690451	2.94258	-200		chrXIV	128902	129334	3.39133	-34
chrVII	111455	112154	2.31658	200		chrVIII	200852	201770	3.35765	-1		chrVII	891962	892564	3.43341	-77		chrIX	60500	61181	3.04122	-147		chrVII	693022	693576	2.83857	-64		chrXIV	146277	146760	3.60627	96
chrVII	114461	115294	2.88573	-214		chrVIII	219705	221736	3.65647	-4		chrVII	897086	897780	3.46048	-69		chrIX	67932	68351	3.15701	-75		chrVII	694675	695855	2.93616	-130		chrXIV	147564	148530	4.4805	-165
chrVII	115797	116216	1.81087	-52		chrVIII	223442	224134	4.21922	-30		chrVII	901964	903484	3.52798	-454		chrIX	73365	73900	3.10267	-180		chrVII	697820	698928	2.88136	-6		chrXIV	172009	172440	2.80431	61
chrVII	120695	122208	2.54684	-545		chrVIII	224940	225342	2.15205	28		chrVII	910230	910667	3.39998	17		chrIX	76999	77554	3.16912	6		chrVII	699403	700266	2.87189	-49		chrXIV	182338	183233	5	-89
chrVII	123027	124784	3.6221	136		chrVIII	226856	227289	3.74012	68		chrVII	911446	912133	3.46797	-93		chrIX	77913	78278	3.14527	22		chrVII	701404	702715	2.92729	-607		chrXIV	187867	188344	2.92613	55
chrVII	130952	131763	4.08214	-167		chrVIII	228727	229601	4.15904	-127		chrVII	914546	915398	3.43321	-234		chrIX	88417	88967	3.12378	24		chrVII	708388	709872	2.79615	1520		chrXIV	202019	202471	3.00135	-183
chrVII	141468	141938	3.65132	23		chrVIII	234307	235124	4.25971	-58		chrVII	921431	922431	3.48562	-244		chrIX	89477	89864	2.39449	44		chrVII	713182	714058	2.94062	-89		chrXIV	206615	207246	2.8085	1
chrVII	143917	144503	2.54243	-598		chrVIII	235798	236151	2.27418	537		chrVII	924197	924949	3.44691	-111		chrIX	92523	93825	3.21494	-386		chrVII	715358	716006	2.80731	-146		chrXIV	214437	215203	3.6774	-103
chrVII	147781	148453	2.55267	471		chrVIII	245859	246549	4.06436	11		chrVII	931781	932422	3.4127	-439		chrIX	96167	96585	3.17789	-1		chrVII	716974	717617	2.82751	-62		chrXIV	228677	229484	3.36472	-13
chrVII	153864	155049	2.18983	-151		chrVIII	249419	250093	3.34299	-115		chrVII	936584	937406	3.46956	-112		chrIX	97201	98011	3.12528	211		chrVII	718469	719268	2.82077	-24		chrXIV	230368	231173	3.01834	1677
chrVII	156943	158144	3.7292	52		chrVIII	250498	251719	3.66937	8		chrVII	939772	940206	3.47301	66		chrIX	101974	102778	3.13941	-141		chrVII	719543	720730	2.87392	-272		chrXIV	233396	233978	3.68772	8
chrVII	172807	173545	2.51615	-97		chrVIII	255588	256639	3.81116	-246		chrVII	944535	945421	3.43016	-167		chrIX	113022	114042	3.1565	-274		chrVII	726143	726568	2.89692	123		chrXIV	237520	238591	4.63616	-182
chrVII	174009	174975	3.68154	-53		chrVIII	272237	273033	4.16588	8		chrVII	946957	947643	3.52062	-120		chrIX	117332	118248	2.88565	-146		chrVII	729253	730223	2.78444	-67		chrXIV	255058	255590	3.37419	-29
chrVII	180259	180987	3.09671	-77		chrVIII	273735	274348	4.14862	-132		chrVII	953208	954245	3.40408	-233		chrIX	126026	126380	3.12903	-1		chrVII	730588	730920	2.89477	67		chrXIV	257944	258575	1.86721	-105
chrVII	182110	182853	4.17871	92		chrVIII	277521	278281	3.87603	-252		chrVII	961828	963310	3.49279	248		chrIX	134774	135400	3.12912	670		chrVII	737694	738660	2.94346	26		chrXIV	269708	270565	3.74077	-544
chrVII	184194	185583	1.37986	505		chrVIII	281013	281861	3.92625	-58		chrVII	981745	982590	3.40925	-100		chrIX	139569	139901	3.03798	-17		chrVII	739290	739839	2.91541	-379		chrXIV	292399	292925	3.92987	7
chrVII	185856	186384	3.05367	61		chrVIII	283044	283455	3.48589	48		chrVII	983945	985101	3.51915	-251		chrIX	143054	143369	3.15996	284		chrVII	749619	750791	2.92588	-114		chrXIV	295697	296306	4.53729	-493
chrVII	190771	191390	3.22797	-48		chrVIII	284217	285015	4.75511	9		chrVII	994954	997156	3.49102	416		chrIX	148444	149313	2.55101	-170		chrVII	753689	754889	2.90848	-437		chrXIV	304344	304806	3.46799	40
chrVII	193057	193752	2.7471	-105		chrVIII	286289	287424	3.17904	-87		chrVII	1007105	1007744	3.50628	-120		chrIX	149712	150191	3.20639	36		chrVII	756253	757954	2.9195	208		chrXIV	318827	319205	2.69723	-207
chrVII	196109	197420	2.13441	-362		chrVIII	301693	302950	2.72887	-388		chrVII	1010499	1010903	3.44872	65		chrIX	151204	151883	3.17636	-51		chrVII	760870	761552	2.89705	-181		chrXIV	321372	321962	5	-308
chrVII	197751	198390	2.25531	-67		chrVIII	301693	302950	2.72887	-388		chrVII	1016512	1017199	3.49947	-106		chrIX	155674	156354	3.00371	-31		chrVII	767255	767836	2.90387	117		chrXIV	323273	324162	3.61659	-114
chrVII	199930	200669	3.40237	-158		chrVIII	314241	316720	1.68338	487		chrVII	1017523	1018265	3.45757	-135		chrIX	169433	170238	3.18363	-195		chrVII	770004	770807	2.8625	-163		chrXIV	326010	327007	4.17857	-189
chrVII	202366	202948	2.38879	-64		chrVIII	319786	320381	2.08763	-330		chrVII	1018959	1019394	3.28061	64		chrIX	171262	172001	3.12965	-119		chrVII	777990	778564	2.83107	-2122		chrXIV	329139	330388	2.68452	309
chrVII	206894	209011	3.06334	920		chrVIII	324457	325821	3.41066	373		chrVII	1021653	1022898	3.46511	-380		chrIX	173199	174115	3.09629	-65		chrVII	780082	782796	2.70521	-328		chrXIV	331894	332662	3.19817	-319
chrVII	213623	214306	2.9494	-116		chrVIII	327812	328569	4.1296	-112		chrVII	1025692	1027481	3.35696	-49		chrIX	179916	180624	3.04307	-31		chrVII	783396	783784	2.88585	1268		chrXIV	339077	339838	3.41599	-111
chrVII	215744	216598	3.09441	-75		chrVIII	331865	333345	3.42565	323		chrVII	1031490	1032007	3.41982	-42		chrIX	182884	183313	3.13876	28		chrVII	786632	787215	2.93016	-4		chrXIV	345881	346564	2.44189	-90
chrVII	217050	217806	4.11658	-59		chrVIII	340933	342871	3.83132	237		chrVII	1038082	1039059	3.51356	-70		chrIX	188519	189321	3.11778	-136		chrVII	792662	793554	2.93425	-55		chrXIV	348243	349144	4.58542	-173
chrVII	225512	226563	2.17929	-361		chrVIII	345279	346326	4.51044	-175		chrVII	1042816	1043539	3.49991	-83		chrIX	192889	193789	2.95325	-144		chrVII	794495	794951	2.89924	267		chrXIV	365593	367080	3.73246	304
chrVII	229382	230498	3.13564	-254		chrVIII	349275	350057	4.40027	92		chrVII	1045198	1045829	3.35955	-34		chrIX	199247	200298	3.13444	346		chrVII	795309	796256	2.88947	-291		chrXIV	369892	370580	2.4694	-132
chrVII	234237	234956	2.92119	-90		chrVIII	352389	353900	3.36977	389		chrVII	1046272	1046995	3.44476	-73		chrIX	203028	203460	3.19692	15		chrVII	800065	800683	2.94867	-172		chrXIV	374934	375794	5	43
chrVII	235608	236211	2.11158	48		chrVIII	357352	358397	2.66921	-983		chrVII	1051354	1052241	3.00403	-73		chrIX	207000	207954	1.53892	1842		chrVII	805661	806766	2.84486	-193		chrXIV	378236	379011	3.72831	-143
chrVII	237911	238495	2.32239	-84		chrVIII	359057	361268	4.57099	18		chrVII	1059784	1060438	3.46744	-71		chrIX	211640	212767	2.52584	-199		chrVII	827252	827794	2.88524	-29		chrXIV	386919	387559	3.42927	12
chrVII	244905	245658	2.79018	-270		chrVIII	363855	364876	4.5781	-213		chrVII	1064760	1067402	3.36084	-1141		chrIX	215840	216848	3.21168	-314		chrVII	828961	829371	2.92055	50		chrXIV	392707	393163	3.20629	43
chrVII	248540	250115	3.572	203		chrVIII	367686	368448	2.91159	-175		chrVII	1068729	1070488	3.37823	-618		chrIX	220779	221158	3.17019	-269		chrVII	830130	830740	2.89862	-80		chrXIV	400238	401386	4.61386	-228
chrVII	253168	254078	1.78804	236		chrVIII	369614	370320	3.13617	-87		chrVII	1072404	1073748	3.52816	-2406		chrIX	229771	230335	3.17181	-59		chrVII	832025	832760	2.81963	-63		chrXIV	407600	408641	4.41514	-220
chrVII	257080	257713	1.7702	-310		chrVIII	371349	372115	3.82966	-17		chrVII	1075844	1078879	3.52025	763		chrIX	230803	231456	3.15867	-58		chrVII	834328	836014	2.8293	-689		chrXIV	412593	413258	3.86993	129
chrVII	265731	266350	2.2813	-104		chrVIII	374131	375298	4.10447	385		chrVII	1079380	1081441	3.48259	-65		chrIX	235300	235967	3.15882	-160		chrVII	836970	837471	2.91997	79		chrXIV	417695	418964	2.82995	158
chrVII	268843	271261	1.71539	92		chrVIII	380069	381680	4.30195	303		chrVII	1084653	1085612	3.43851	269		chrIX	237458	238083	3.14708	-11		chrVII	842226	842948	2.94907	-36		chrXIV	419575	420273	2.57142	-98
chrVII	268843	271261	1.71539	92		chrVIII	385836	387506	4.19851	-562		chrVII	1087097	1087763	3.44976	2015		chrIX	241602	242409	3.19569	63		chrVII	843362	844255	2.94341	-45		chrXIV	424212	424952	5	-87
chrVII	276202	277126	1.69341	50		chrVIII	389636	390523	2.9357	-220		chrVIII	3049	4042	3.46912	-235		chrIX	244231	245008	3.15519	-158		chrVII	846148	846694	2.76313	-16		chrXIV	439016	439588	4.41179	-19
chrVII	283677	284675	2.67106	-239		chrVIII	393009	393823	4.29277	-118		chrVIII	4678	5220	3.07424	-408		chrIX	245275	245759	3.15136	42		chrVII	849282	849800	2.79893	821		chrXIV	446924	447547	2.34266	-375
chrVII	289118	289962	1.34318	-269		chrVIII	397086	397630	3.2774	107		chrVIII	10264	12335	3.16492	985		chrIX	246810	247685	3.18735	-333		chrVII	850456	851118	2.85076	-351		chrXIV	450341	450791	2.64332	-305
chrVII	291537	292175	1.81765	-177		chrVIII	400535	401574	3.71819	-207		chrVIII	13075	14267	3.45279	106		chrIX	273626	274294	3.20318	-114		chrVII	853140	853944	2.92536	-327		chrXIV	456295	456732	2.01846	-51
chrVII	295759	296183	2.99606	39		chrVIII	402844	403186	2.53277	49		chrVIII	20773	21948	3.35499	-390		chrIX	275982	276784	3.12685	-91		chrVII	854488	855261	2.87616	20		chrXIV	459280	460024	2.74125	1948
chrVII	299474	300300	4.53031	-91		chrVIII	406372	407373	4.49106	-230		chrVIII	25247	26302	3.44777	-266		chrIX	277596	278639	3.17076	-308		chrVII	857572	858523	2.82043	-239		chrXIV	466017	467055	3.6125	202
chrVII	303154	304416	1.52161	272		chrVIII	417005	418017	3.84305	-38		chrVIII	34041	34650	3.4896	-269		chrIX	282629	283452	3.13282	-389		chrVII	867177	868086	2.91273	-112		chrXIV	470924	471715	4.64384	-57
chrVII	306004	306921	4.29337	-97		chrVIII	436743	437669	3.89619	-258		chrVIII	38228	40336	3.52479	204		chrIX	288726	289468	2.98543	-189		chrVII	871152	871959	2.8815	-140		chrXIV	476294	476831	3.69791	56
chrVII	309880	310674	2.74287	-104		chrVIII	438774	439665	4.05695	-122		chrVIII	62315	63258	3.51568	-224		chrIX	289869	290446	3.20525	-69		chrVII	873830	876261	2.87652	63		chrXIV	485173	485980	5	-30
chrVII	312884	313466	2.7123	-59		chrVIII	439961	440812	3.42978	10		chrVIII	69310	70505	3.45664	200		chrIX	292368	292783	3.1105	-57		chrVII	885503	886206	2.64531	-114		chrXIV	493174	493583	2.34041	13
chrVII	314125	314988	4.08416	-74		chrVIII	441712	442495	2.97266	-77		chrVIII	76908	77679	3.49404	20		chrIX	301099	302143	3.19778	-364		chrVII	888569	889515	2.90552	160		chrXIV	509943	510859	4.71305	-139
chrVII	319179	322094	3.88059	-1145		chrVIII	443226	444088	3.84472	-171		chrVIII	78079	78808	3.41121	-91		chrIX	303776	304591	3.01307	-80		chrVII	891894	892376	2.85308	51		chrXIV	514620	515344	3.18795	-47
chrVII	330434	331042	2.21736	-131		chrVIII	447995	448607	4.29505	-34		chrVIII	81419	82023	3.14144	-105		chrIX	307717	308055	3.12331	43		chrVII	897161	897916	2.95503	37		chrXIV	525541	526395	4.65165	-118
chrVII	334400	335099	2.78235	-136		chrVIII	453706	454677	2.40933	-37		chrVIII	83449	84173	3.43492	-90		chrIX	312616	313204	3.0903	5		chrVII	901272	903356	2.90998	-44		chrXIV	532438	532932	3.26952	26
chrVII	342882	343548	2.75344	-104		chrVIII	456303	456861	2.84298	-9		chrVIII	84895	85264	3.15966	-20		chrIX	314474	315414	3.15013	-124		chrVII	910259	910690	2.94499	43		chrXIV	537634	538405	4.18701	-109
chrVII	345398	346129	1.92397	-72		chrVIII	459129	459635	2.21659	83		chrVIII	97829	99391	3.42026	185		chrIX	320744	321777	2.49861	-193		chrVII	911391	912326	2.91582	-24		chrXIV	544840	545499	3.29281	-98
chrVII	346712	347467	3.90031	-29		chrVIII	464003	465671	1.96796	-341		chrVIII	101753	102855	3.50409	-308		chrIX	334186	335176	3.06846	-201		chrVII	914538	915442	2.91261	-251		chrXIV	551778	552518	2.95718	-161
chrVII	349263	349862	2.47862	-53		chrVIII	465958	466680	3.32355	-613		chrVIII	129047	129736	3.43981	-89		chrIX	335997	336345	3.18935	41		chrVII	921420	922501	2.85316	-214		chrXIV	554819	555309	3.74917	16
chrVII	352104	353256	3.30517	-378		chrVIII	468037	468909	3.59444	254		chrVIII	131167	131960	3.48394	-118		chrIX	343483	344399	3.14771	-121		chrVII	924138	924961	2.90652	-88		chrXIV	578420	579785	4.57156	-330
chrVII	355299	355985	2.22107	-185		chrVIII	480413	481255	4.0132	-156		chrVIII	132566	133008	3.38669	740		chrIX	348249	349339	3.20239	-289		chrVII	931675	932382	2.92983	-512		chrXIV	581707	582188	3.22877	28
chrVII	357071	359713	2.70265	-244		chrVIII	483432	484736	2.76142	56		chrVIII	138320	138990	3.34647	-39		chrIX	349900	350557	3.147	-72		chrVII	936433	937468	2.8923	-68		chrXIV	590909	591601	3.66115	-95
chrVII	361582	362022	1.96784	57		chrVIII	486336	487208	4.09221	-54		chrVIII	143292	144235	3.46378	-206		chrIX	362845	363518	3.17935	-39		chrVII	939766	940260	2.74182	90		chrXIV	592548	593368	3.33023	-59
chrVII	366727	367119	2.70405	-927		chrVIII	487960	489087	4.78171	-133		chrVIII	151052	151870	3.36948	-155		chrIX	369664	370094	3.20824	29		chrVII	941985	943103	2.88718	-262		chrXIV	606399	606879	3.43119	320
chrVII	367955	368842	2.68512	-311		chrVIII	491541	492226	4.82333	-47		chrVIII	158926	159710	3.38945	-120		chrIX	378015	378900	1.52339	-28		chrVII	944367	945868	2.90711	-27		chrXIV	646592	647721	3.95457	-207
chrVII	371381	371708	2.24832	-183		chrVIII	493464	494229	4.18577	-49		chrVIII	160323	161060	3.43691	-152		chrIX	380900	381320	3.12867	24		chrVII	947048	947716	2.9104	-38		chrXIV	652678	653722	2.96751	-187
chrVII	374537	375359	4.49597	-121		chrVIII	500885	501579	3.07407	-89		chrVIII	164560	165092	3.27051	-115		chrIX	396779	397652	3.07138	-78		chrVII	953158	954291	2.8949	-235		chrXIV	667738	668822	4.53079	-58
chrVII	375762	376271	1.98495	-84		chrVIII	501950	502851	3.67986	13		chrVIII	172598	173469	3.26331	-64		chrIX	398130	399040	2.64533	71		chrVII	961824	963174	2.92559	318		chrXIV	669828	670709	5	-76
chrVII	377074	377868	3.41508	-138		chrVIII	506024	506766	3.62059	76		chrVIII	177699	178500	3.34277	-101		chrIX	399296	400106	3.0154	-76		chrVII	965446	965870	2.85737	-3		chrXIV	672228	672663	2.74746	37
chrVII	381034	382302	2.59504	-397		chrVIII	508485	509206	3.04209	-517		chrVIII	179762	180772	3.49134	-78		chrIX	403237	403830	2.97354	-43		chrVII	968399	968979	2.78971	-2		chrXIV	674256	675206	4.40519	-42
chrVII	382902	383841	3.86498	-164		chrVIII	512399	512675	2.53653	-195		chrVIII	187489	188264	3.34242	-47		chrIX	405556	407025	1.80289	-324		chrVII	981725	982633	2.78042	-111		chrXIV	685321	686253	5	-223
chrVII	388923	390207	3.67181	146		chrVIII	516185	517640	3.86752	-428		chrVIII	188877	190724	3.44031	63		chrIX	415363	416338	3.03936	-234		chrVII	983506	985202	2.91741	-82		chrXIV	687231	687857	2.44866	-80
chrVII	391703	392407	3.00784	-168		chrVIII	521412	523370	4.14672	-654		chrVIII	193294	194214	3.38237	-209		chrIX	424403	425915	2.90369	-646		chrVII	995002	997252	2.90232	488		chrXIV	693694	695982	3.5451	-16
chrVII	393513	394191	2.90791	-134		chrVIII	534402	534985	2.79988	3400		chrVIII	194558	195717	3.42134	-330		chrIX	435884	436622	2.78301	-270		chrVII	998917	999352	2.87298	5		chrXIV	705900	706464	3.29655	43
chrVII	401693	402766	1.61058	-359		chrVIII	542849	543611	4.13721	222		chrVIII	200954	201941	3.5254	-138		chrX	11103	11801	3.03781	-23		chrVII	1007106	1007733	2.93087	-115		chrXIV	707340	708808	5	286
chrVII	404006	404835	2.09035	734		chrVIII	550532	552306	3.84222	80		chrVIII	212324	216230	1.89953	-28		chrX	19845	21188	3.1072	1020		chrVII	1010315	1010924	2.95078	146		chrXIV	720420	720895	3.10998	-11
chrVII	405689	406051	1.69194	94		chrVIII	553517	554047	4.36968	-614		chrVIII	218721	219244	3.38381	-140		chrX	22566	23259	3.16703	-220		chrVII	1016445	1017228	2.74212	-87		chrXIV	736094	736932	3.54912	-290
chrVII	409481	409866	1.85991	-70		chrVIII	558529	559501	5	-917		chrVIII	219659	221712	3.17928	-39		chrX	27945	28896	3.17111	1534		chrVII	1017508	1019403	2.94302	-697		chrXIV	741886	742533	2.55461	1330
chrVII	416933	417695	3.35806	-169		chrIX	3170	4564	5	2280		chrVIII	223469	224078	3.48155	-16		chrX	37520	38211	3.12992	-139		chrVII	1021663	1022933	2.93661	-358		chrXIV	746602	747129	3.22268	-77
chrVII	418627	419082	2.49312	30		chrIX	6168	6633	1.35562	-254		chrVIII	226867	227323	3.45636	46		chrX	40924	41624	3.1723	-91		chrVII	1025804	1027562	2.88429	-30		chrXV	21036	22023	2.78955	-219
chrVII	420476	423020	3.79335	-1193		chrIX	10496	11955	2.62897	-266		chrVIII	228750	229694	3.31048	-113		chrX	47170	47615	3.03156	40		chrVII	1031502	1032145	2.82355	33		chrXV	44741	45237	3.97954	51
chrVII	428475	428837	2.47633	55		chrIX	20356	21712	3.23318	-2481		chrVIII	234295	235207	3.47318	-93		chrX	52939	53617	3.1749	-63		chrVII	1038015	1039065	2.86904	-39		chrXV	47270	48086	5	-104
chrVII	433895	437136	3.2323	-109		chrIX	30528	31600	2.32051	1502		chrVIII	237930	239368	3.44882	-449		chrX	54184	54680	3.1219	53		chrVII	1042766	1043567	2.88698	-72		chrXV	52461	53308	4.59968	-97
chrVII	439664	440512	2.18792	25		chrIX	32710	33310	3.28541	-444		chrVIII	241349	242769	3.34065	395		chrX	59781	61043	3.14997	-230		chrVII	1045103	1047097	2.89464	461		chrXV	54878	56715	5	239
chrVII	443105	443818	3.0522	-553		chrIX	34616	35449	2.82749	-347		chrVIII	245789	246457	3.52789	-70		chrX	63180	63955	3.01349	-237		chrVII	1051351	1052144	2.86579	-23		chrXV	69774	70619	2.93446	-128
chrVII	445861	446304	2.12449	60		chrIX	37087	37928	3.27017	123		chrVIII	249420	250125	3.48004	-132		chrX	70976	71716	3.04754	-20		chrVII	1059811	1060406	2.94678	-69		chrXV	86349	86953	3.83944	106
chrVII	448335	448939	2.16877	-102		chrIX	38854	39847	3.30409	-82		chrVIII	250587	251708	3.51647	47		chrX	73195	73502	3.12058	65		chrVII	1062833	1063292	2.7875	90		chrXV	101124	101688	2.67156	-69
chrVII	449717	450120	3.18398	38		chrIX	41267	42149	3.64987	-117		chrVIII	255547	256570	3.45701	-301		chrX	82403	84360	2.91374	-66		chrVII	1064746	1067430	2.81357	-1148		chrXV	137566	138154	2.91378	-35
chrVII	451800	452709	5	-149		chrIX	47094	48569	4.24316	142		chrVIII	272307	272905	3.51547	-21		chrX	88269	89009	3.18505	-79		chrVII	1075810	1079010	2.84016	811		chrXV	138696	139391	3.58795	1
chrVII	457606	458377	4.0137	-122		chrIX	54711	55527	3.36718	-79		chrVIII	273705	274200	3.50778	-221		chrX	89915	90194	2.94059	42		chrVII	1084673	1085101	2.71648	23		chrXV	143893	144562	4.62494	24
chrVII	459334	460148	4.34566	-77		chrIX	56269	57177	3.51186	178		chrVIII	276407	277021	3.30328	-50		chrX	109377	109969	3.18589	-212		chrVII	1087120	1087762	2.5638	2004		chrXV	158655	159316	2.55702	-187
chrVII	461175	461939	3.67181	-109		chrIX	60500	61180	4.52346	-146		chrVIII	277498	278282	3.51944	-263		chrX	113021	113584	3.07442	30		chrVIII	3033	3962	2.90393	-187		chrXV	167510	168009	1.95409	-967
chrVII	465338	466007	2.46709	-238		chrIX	62461	63182	2.24353	-94		chrVIII	281128	281857	3.52946	-2		chrX	115186	115815	3.1329	128		chrVIII	4645	5225	2.88192	-394		chrXV	181093	181983	4.70364	-111
chrVII	491707	492300	2.33308	-48		chrIX	67939	68313	3.55973	-59		chrVIII	282997	283510	3.51164	44		chrX	128728	129268	3.1881	-46		chrVIII	10484	12172	2.91799	957		chrXV	186458	187398	4.93898	-96
chrVII	493964	494722	2.82732	-169		chrIX	73365	73919	3.5328	-189		chrVIII	284326	284982	3.46111	-29		chrX	139970	140699	3.01954	-102		chrVIII	13248	14464	2.93858	291		chrXV	194428	195249	5	-39
chrVII	497807	498415	2.19367	-77		chrIX	75586	76565	2.71273	-303		chrVIII	286366	287188	3.36399	-7		chrX	142363	143360	3.09776	-295		chrVIII	15041	16597	2.73576	152		chrXV	205581	206084	2.84041	52
chrVII	499636	500362	2.80236	-93		chrIX	77058	77463	3.20818	22		chrVIII	301706	302951	3.31447	-395		chrX	146801	147438	3.10834	19		chrVIII	20903	22015	2.74707	-324		chrXV	210001	210488	3.15646	20
chrVII	502497	503229	2.59785	-75		chrIX	77921	78284	1.83929	29		chrVIII	327793	328565	3.53096	-124		chrX	150508	151180	3.17997	-117		chrVIII	25029	25752	2.84157	118		chrXV	211708	212620	5	-80
chrVII	505644	507162	3.13013	333		chrIX	82759	83580	4.67724	-129		chrVIII	331899	333330	3.41052	333		chrX	158036	158445	3.18105	53		chrVIII	33970	34611	2.90764	-214		chrXV	230046	230473	1.96651	175
chrVII	510792	511936	2.22477	-181		chrIX	88211	89041	2.38675	90		chrVIII	337737	338263	2.99729	-83		chrX	165090	165518	3.16321	44		chrVIII	38055	40421	2.86297	164		chrXV	232954	234917	3.06818	-300
chrVII	512661	513505	3.59287	-76		chrIX	92506	93983	3.59526	-374		chrVIII	341222	342653	3.48386	273		chrX	184027	184816	3.04639	-79		chrVIII	48566	49340	2.83893	190		chrXV	246917	247307	3.12291	-38
chrVII	514113	514792	2.48395	-101		chrIX	96173	96760	3.84139	-92		chrVIII	345290	346173	3.48219	-104		chrX	186419	187084	3.12199	-73		chrVIII	62249	63226	2.88241	-175		chrXV	277832	278255	3.24113	-12
chrVII	521676	522521	2.70474	-23		chrIX	97195	98120	3.79819	263		chrVIII	349218	350026	3.35581	48		chrX	187469	188063	3.02076	-122		chrVIII	69188	70565	2.94191	169		chrXV	303592	304400	4.82656	-13
chrVII	523171	523886	3.25474	-258		chrIX	99906	100657	2.7572	219		chrVIII	358901	361196	2.46936	132		chrX	189132	190117	2.95808	-91		chrVIII	76854	77677	2.94581	48		chrXV	310013	310568	2.48092	-21
chrVII	527154	527785	2.29672	-141		chrIX	101762	102832	4.68374	-62		chrVIII	363910	364882	3.45959	-243		chrX	190806	191521	3.21507	-74		chrVIII	77937	78550	2.94826	109		chrXV	315861	316950	3.64311	-231
chrVII	531263	531579	2.31824	1175		chrIX	112947	114019	4.18677	-246		chrVIII	367755	368431	3.4074	-201		chrX	192043	192747	2.99369	-136		chrVIII	81399	82160	2.87327	-164		chrXV	356916	357692	2.26479	-370
chrVII	532314	533096	3.8303	66		chrIX	117356	118257	4.941	-163		chrVIII	369612	370265	3.39702	-115		chrX	207452	208134	3.19657	-84		chrVIII	83443	84217	2.79471	-109		chrXV	360927	361742	2.77483	-77
chrVII	541995	542480	2.21173	35		chrIX	126026	126511	3.45795	65		chrVIII	371323	372037	3.46156	-69		chrX	211573	212207	3.19539	-313		chrVIII	84837	85272	2.75004	5		chrXV	373106	373747	3.68567	12
chrVII	543367	544528	2.29079	395		chrIX	134654	135544	3.12411	682		chrVIII	374098	375932	3.45533	85		chrX	217007	217493	3.15563	59		chrVIII	97809	99432	2.92999	174		chrXV	405218	405894	2.46479	-168
chrVII	545910	546692	2.21921	-140		chrIX	139569	139912	2.86748	-11		chrVIII	377529	379714	3.13597	577		chrX	226797	227855	3.14431	-1		chrVIII	101722	102916	2.81296	-293		chrXV	407797	408679	3.11647	-187
chrVII	556538	557688	2.61759	309		chrIX	142846	143434	2.54027	212		chrVIII	379958	381756	3.47747	285		chrX	241417	241935	3.20141	-406		chrVIII	111016	111413	2.86948	102		chrXV	413667	414086	2.65207	25
chrVII	558730	559386	2.26225	-190		chrIX	150565	151972	3.74438	-326		chrVIII	384593	385341	3.41795	-543		chrX	245279	245842	3.20365	-30		chrVIII	127466	128276	2.7073	91		chrXV	415600	416075	2.52321	69
chrVII	579005	579730	3.15319	-108		chrIX	155651	156435	3.7888	-2		chrVIII	386029	387540	3.32356	-448		chrX	246166	246697	3.17434	-58		chrVIII	129078	129733	2.89686	-75		chrXV	421360	422488	1.99386	-274
chrVII	589243	589832	2.09545	-69		chrIX	159953	161039	3.20537	-331		chrVIII	388459	388884	3.41905	54		chrX	247082	247507	3.15482	40		chrVIII	130988	131798	2.84452	53		chrXV	453179	453937	3.71602	-96
chrVII	593094	594644	1.55216	273		chrIX	169390	170145	2.87007	-127		chrVIII	389576	390514	3.41248	-255		chrX	256475	257608	2.66583	-230		chrVIII	132583	132986	2.75495	738		chrXV	457810	458514	2.56658	-342
chrVII	595112	596099	2.97657	231		chrIX	171252	172056	3.55174	-97		chrVIII	393035	393883	3.24863	-75		chrX	260597	260990	3.20469	1758		chrVIII	138310	139042	2.81061	-18		chrXV	464517	464993	4.10241	-16
chrVII	596411	596707	2.11952	-134		chrIX	173165	174129	3.32973	-55		chrVIII	396495	397588	3.47598	-209		chrX	262179	262803	3.18159	61		chrVIII	143127	144246	2.86038	-129		chrXV	467978	468481	3.88207	18
chrVII	601562	601858	1.71685	49		chrIX	179809	180705	4.31481	-18		chrVIII	400596	401606	3.53073	-253		chrX	264805	265342	3.1112	-23		chrVIII	158851	159815	2.92257	-105		chrXV	471382	472126	3.50309	-134
chrVII	605282	606420	3.13644	-285		chrIX	182822	183320	4.55542	56		chrVIII	402550	403240	3.51735	-71		chrX	272284	272999	3.13754	-157		chrVIII	160281	161148	2.83413	-129		chrXV	481546	482294	3.09928	-113
chrVII	616999	618369	3.908	63		chrIX	183659	184213	3.00527	-1		chrVIII	405940	407317	3.37864	-474		chrX	278642	279112	3.20223	36		chrVIII	164483	164924	2.83087	7		chrXV	486544	487181	3.68975	-84
chrVII	619629	620700	3.00049	-307		chrIX	187466	189310	4.11371	396		chrVIII	417049	417793	3.47772	-128		chrX	284980	285633	3.17831	-36		chrVIII	172480	173549	2.90628	-45		chrXV	502326	503022	3.32079	-121
chrVII	621267	625242	3.19863	-1456		chrIX	192900	193831	4.48309	-171		chrVIII	429039	429720	3.44786	-202		chrX	291508	292309	3.15504	-1135		chrVIII	177563	178518	2.94114	-42		chrXV	510825	511965	4.60671	-217
chrVII	626805	627490	3.62896	-64		chrIX	199135	200429	3.23408	337		chrVIII	436824	437543	3.40455	-236		chrX	294985	295584	1.62033	40		chrVIII	179761	180698	2.92465	-115		chrXV	533731	534296	3.12937	-61
chrVII	633852	634558	3.97506	-99		chrIX	202955	203553	3.10687	5		chrVIII	438824	439634	3.49813	-113		chrX	302583	303330	3.18252	-108		chrVIII	187453	190699	2.69389	788		chrXV	539230	539636	2.28348	32
chrVII	635262	635994	3.00123	-84		chrIX	206684	208037	5	1726		chrVIII	439996	440701	3.47121	-28		chrX	305617	306277	3.19357	-85		chrVIII	193200	193946	2.89412	-28		chrXV	544061	544566	3.23494	-169
chrVII	636640	637986	3.35046	264		chrIX	211694	212694	4.3172	-189		chrVIII	441711	442458	3.4736	-96		chrX	312332	313055	2.2456	12		chrVIII	194668	195813	2.88325	-310		chrXV	554281	554868	5	-5
chrVII	639258	639843	3.37527	-38		chrIX	215734	216889	3.96765	-346		chrVIII	443206	444139	3.39526	-155		chrX	314649	317723	2.89451	289		chrVIII	200939	201467	2.89699	107		chrXV	569336	569990	2.43965	-105
chrVII	640103	640528	3.47178	55		chrIX	229754	230355	2.58824	-61		chrVIII	447872	448600	3.33316	-99		chrX	319545	320278	3.1106	-104		chrVIII	215745	216217	2.85414	-1263		chrXV	570707	571310	2.80222	-202
chrVII	641543	642294	3.14837	-91		chrIX	230799	231633	3.60096	-144		chrVIII	453649	454902	3.44457	47		chrX	322818	323546	3.15577	-204		chrVIII	219638	221872	2.81612	30		chrXV	592262	593024	4.77468	-56
chrVII	643462	644294	3.75332	-98		chrIX	235237	235998	4.10634	-144		chrVIII	456206	456843	2.97071	-66		chrX	324809	325385	3.15621	133		chrVIII	223262	224027	2.80744	113		chrXV	602179	602760	2.31334	-128
chrVII	646518	647173	3.59505	-31		chrIX	237256	238194	3.79561	35		chrVIII	459099	459565	3.42325	33		chrX	327425	328022	2.93083	149		chrVIII	224963	225452	2.86481	-39		chrXV	605925	606873	2.88882	-208
chrVII	647808	648465	3.77055	5		chrIX	239245	240949	3.3377	611		chrVIII	465934	467380	3.36492	-275		chrX	334125	334536	3.19807	66		chrVIII	226801	227668	2.72463	-94		chrXV	611226	612310	4.35253	-231
chrVII	651531	653651	2.49848	390		chrIX	241451	242562	3.83721	64		chrVIII	468032	468945	3.37782	270		chrX	341992	342838	3.10095	-107		chrVIII	228479	229715	2.8781	-60		chrXV	616660	617556	4.03667	-437
chrVII	659997	660305	1.85598	-2207		chrIX	243080	244978	3.58546	-285		chrVIII	473476	474478	3.39437	1233		chrX	345499	346165	3.1818	-141		chrVIII	234210	235256	2.91434	-75		chrXV	618172	618783	3.14603	-190
chrVII	662032	662305	1.60904	-189		chrIX	245217	245834	3.63488	33		chrVIII	480478	481259	3.40372	-121		chrX	351991	352635	3.0444	-73		chrVIII	235811	236169	2.88456	522		chrXV	627701	628207	3.49142	26
chrVII	666029	666593	2.55852	-30		chrIX	246647	247715	3.0814	-266		chrVIII	483583	484780	3.48786	154		chrX	359370	359871	3.19616	55		chrVIII	237969	239474	2.76959	-376		chrXV	631578	632433	3.29468	-158
chrVII	669884	670612	1.94564	-140		chrIX	259880	261511	2.80521	538		chrVIII	486373	487115	3.52852	-82		chrX	360982	361472	3.1427	-22		chrVIII	241522	242840	2.95056	-401		chrXV	633311	634025	2.69299	-102
chrVII	671717	672321	2.01873	-167		chrIX	275957	276763	3.68472	-68		chrVIII	487997	488949	3.37417	-184		chrX	365349	366065	3.15452	-77		chrVIII	245828	246591	2.94232	17		chrXV	642009	642991	3.13562	-241
chrVII	676047	677600	3.06035	203		chrIX	277449	278786	3.70828	-308		chrVIII	491711	492266	3.34891	58		chrX	373646	374290	3.09742	-169		chrVIII	249385	250120	2.89575	-112		chrXV	644023	644818	3.515	-89
chrVII	687365	688160	4.23839	-136		chrIX	282674	283501	3.62392	-436		chrVIII	493405	494232	3.50445	-77		chrX	375889	376273	3.14897	-307		chrVIII	250559	251781	2.94784	69		chrXV	648075	649639	2.72672	150
chrVII	689676	690379	2.74993	-217		chrIX	284676	285761	2.86362	-220		chrVIII	496988	497629	3.34821	-29		chrX	383640	384188	3.13368	77		chrVIII	255503	256614	2.9558	-301		chrXV	653611	654477	4.0445	-160
chrVII	694829	695814	3.69258	-95		chrIX	288744	289471	4.66479	-200		chrVIII	500897	501620	3.37228	-116		chrX	390641	391008	3.09066	28		chrVIII	261478	262161	2.87385	-229		chrXV	658459	658904	2.83624	-65
chrVII	698038	698866	3.98339	-84		chrIX	289867	290450	3.39056	-70		chrVIII	501872	502621	3.51385	-141		chrX	393765	394251	3.09986	41		chrVIII	266851	267819	2.92199	-203		chrXV	661506	662210	2.65426	-184
chrVII	699531	700313	3.75987	-136		chrIX	292398	292828	3.47855	-20		chrVIII	506013	506564	3.35859	-30		chrX	402257	403401	3.1831	-68		chrVIII	272252	272981	2.87868	-10		chrXV	672208	672993	1.3931	-190
chrVII	701375	702737	2.8386	-611		chrIX	299741	300209	4.18177	34		chrVIII	508470	509207	3.41784	-524		chrX	407157	407841	3.12067	-59		chrVIII	273724	274854	2.94877	115		chrXV	675464	676117	2.46015	-148
chrVII	704975	705725	2.43618	1151		chrIX	301072	302540	3.56608	-294		chrVIII	512362	512686	3.27438	-208		chrX	410696	411168	3.21397	108		chrVIII	276414	277020	2.88914	-47		chrXV	712345	713135	4.1257	-126
chrVII	708960	709798	4.32856	1769		chrIX	303374	304698	4.39244	68		chrVIII	516186	517661	3.518	-439		chrX	413181	413858	3.14622	-121		chrVIII	277516	278323	2.95533	-233		chrXV	716505	717485	5	-91
chrVII	712690	713937	2.93007	-395		chrIX	307615	308184	3.75703	29		chrVIII	521501	523321	3.48682	-674		chrX	414460	416003	2.95108	-462		chrVIII	281087	281916	2.88009	7		chrXV	726927	727737	3.05361	-98
chrVII	715385	715973	1.80283	-149		chrIX	310103	310656	4.22419	46		chrVIII	534394	535054	3.37051	3370		chrX	419269	419737	3.08001	59		chrVIII	284129	284915	2.80692	103		chrXV	733141	733967	4.44658	-97
chrVII	716981	717602	2.2412	-66		chrIX	310914	311372	3.38366	-22		chrVIII	543133	543666	3.46947	392		chrX	421467	422173	3.19715	-157		chrVIII	286301	287149	2.89053	45		chrXV	737693	738632	4.24184	-157
chrVII	718442	719131	4.09422	-106		chrIX	312635	313212	4.19463	19		chrVIII	553505	554912	1.70366	-187		chrX	423874	424335	3.0891	4		chrVIII	301700	303032	2.47702	-395		chrXV	741442	741908	2.61656	-106
chrVII	719593	720622	3.45575	-301		chrIX	314240	315547	4.46765	-74		chrVIII	557308	557670	3.38197	-447		chrX	438432	439154	3.18791	-72		chrVIII	314346	315184	2.90558	-92		chrXV	748707	749563	4.2119	-156
chrVII	726154	726588	3.55247	108		chrIX	320734	321785	4.69899	-194		chrIX	3613	4321	2.91744	2180		chrX	442249	442738	3.17244	59		chrVIII	315602	316777	2.81135	-222		chrXV	759647	760027	2.36288	55
chrVII	729380	730189	4.24332	-114		chrIX	322674	324117	3.60911	1054		chrIX	6200	6674	3.3714	-290		chrX	445412	446076	3.21289	-179		chrVIII	324492	325786	2.76381	373		chrXV	760901	761723	4.57506	-47
chrVII	730619	730894	2.15227	64		chrIX	324406	326186	3.51676	230		chrIX	10359	11823	3.51771	-401		chrX	448825	449560	2.96789	-9		chrVIII	327749	328612	2.93883	-122		chrXV	774260	774795	4.25008	-45
chrVII	733421	734310	2.28217	-69		chrIX	331643	332629	2.5899	306		chrIX	15750	18728	3.41328	-1021		chrX	450352	451220	3.16116	-234		chrVIII	330042	330584	2.88645	3		chrXV	786978	787467	3.50506	228
chrVII	737836	738674	3.21187	-52		chrIX	333366	335312	4.28254	-543		chrIX	30495	31670	3.44967	1483		chrX	458155	458800	3.21564	-117		chrVIII	331877	333372	2.93944	343		chrXV	791937	792798	4.36447	-127
chrVII	739308	739987	2.52521	-296		chrIX	335826	336329	2.98685	134		chrIX	32667	33422	3.51661	-479		chrX	461289	462039	3.14826	-165		chrVIII	335501	336562	2.85576	-305		chrXV	796595	796997	2.8064	-3
chrVII	741817	742438	1.70952	-197		chrIX	342151	342808	3.28185	-56		chrIX	34639	35412	3.37258	-340		chrX	466792	467541	3.20323	-134		chrVIII	337847	338338	2.88531	10		chrXV	802058	802785	3.3514	-115
chrVII	749704	750700	3.94282	-111		chrIX	343380	344447	4.72246	-148		chrIX	35847	37842	3.52366	407		chrX	469371	469998	3.16087	-99		chrVIII	340984	342834	2.81894	244		chrXV	803261	804670	3.51299	299
chrVII	753746	755209	2.30582	-248		chrIX	345223	345970	2.72303	-95		chrIX	38892	39740	3.4604	-117		chrX	490569	491421	3.14423	-86		chrVIII	345072	346421	2.89737	-119		chrXV	806736	807247	4.72285	31
chrVII	756281	757938	2.49541	214		chrIX	348202	349407	3.75369	-300		chrIX	41321	42189	3.33922	-70		chrX	503256	504224	3.18885	-196		chrVIII	349308	350262	2.88511	211		chrXV	813550	814294	4.2979	-62
chrVII	760871	761534	2.50625	-189		chrIX	349860	350545	3.64073	-98		chrIX	45828	46570	3.42368	-2		chrX	507293	507948	3.17237	-125		chrVIII	352349	352945	2.78767	-109		chrXV	816838	817555	2.93652	-95
chrVII	767063	767818	4.33989	12		chrIX	356647	357279	2.11627	-68		chrIX	47300	48378	3.50416	149		chrX	513427	514389	3.14818	-145		chrVIII	353220	353826	2.85608	-102		chrXV	826152	826588	2.2531	-15
chrVII	769993	770777	2.85602	-184		chrIX	360209	361175	2.58147	-193		chrIX	54823	55484	3.31134	-44		chrX	521854	522275	3.16567	17		chrVIII	357493	358442	2.66188	-890		chrXV	830446	830900	3.82136	-99
chrVII	778026	778428	2.13342	-2172		chrIX	362938	363537	3.39984	17		chrIX	56264	57160	3.41474	167		chrX	531904	532293	3.20302	37		chrVIII	359333	360098	2.85184	465		chrXV	832459	833159	4.01896	-4
chrVII	779213	779573	1.3734	-1006		chrIX	364614	365168	3.01178	2		chrIX	60536	61240	3.32964	-194		chrX	535478	536113	3.19474	-260		chrVIII	360368	361328	2.9092	-65		chrXV	840922	841616	2.29521	-64
chrVII	780059	782214	4.62499	-630		chrIX	369616	370150	3.88612	25		chrIX	62470	63189	3.3165	-102		chrX	538637	539111	3.21298	102		chrVIII	361666	362333	2.84375	-115		chrXV	860055	860532	2.78114	-36
chrVII	786701	787320	3.80145	-91		chrIX	373886	375811	5	324		chrIX	67941	68327	3.49638	-67		chrX	542344	542836	3.15144	-88		chrVIII	363677	364848	2.65534	-110		chrXV	867821	868692	4.26115	-83
chrVII	792811	793484	3.16368	-95		chrIX	377979	378846	5	-73		chrIX	73361	73971	3.34977	-213		chrX	554537	556179	1.83382	163		chrVIII	367686	368422	2.92164	-162		chrXV	875073	875507	3.2002	31
chrVII	794514	794911	2.6907	277		chrIX	384510	384968	2.74457	130		chrIX	75752	76530	3.34839	-368		chrX	558874	559645	3.19433	-102		chrVIII	369602	370285	2.84673	-110		chrXV	888448	889328	3.57982	-134
chrVII	795314	796471	3.10446	-199		chrIX	396739	400110	4.36473	-89		chrIX	77042	78270	3.51014	-373		chrX	567126	567897	3.06948	-68		chrVIII	371319	372049	2.91529	-65		chrXV	899655	900439	3.96124	-119
chrVII	800115	800656	2.60421	-160		chrIX	403127	403959	3.26379	-52		chrIX	82823	83590	3.51778	-95		chrX	569092	569729	3.18635	-12		chrVIII	374040	375253	2.87479	-337		chrXV	912510	913093	3.47193	-20
chrVII	805735	806788	4.13776	-241		chrIX	405548	407999	5	-807		chrIX	92542	93498	3.22669	-232		chrX	576319	576812	3.17949	35		chrVIII	377563	378434	2.77576	-300		chrXV	914974	915345	2.36064	-66
chrVII	807608	808229	1.94084	-263		chrIX	409367	411211	2.92381	-518		chrIX	96199	96779	3.46431	-114		chrX	581464	582736	1.98116	155		chrVIII	380437	381685	2.90446	489		chrXV	920885	921574	5	-168
chrVII	827190	827771	3.16449	-71		chrIX	422156	423375	3.84556	99		chrIX	97173	98002	3.48076	193		chrX	583209	583989	3.0321	-62		chrVIII	384668	385359	2.86941	-496		chrXV	922588	923321	3.83536	-50
chrVII	828975	829356	2.4253	50		chrIX	424338	426583	5	-948		chrIX	99857	100984	3.3985	80		chrX	585821	586342	3.09089	14		chrVIII	385935	387560	2.90048	-485		chrXV	943007	943983	5	-110
chrVII	830095	830699	2.51237	-118		chrIX	428584	429927	2.32988	2855		chrIX	101840	102846	3.10057	-108		chrX	587138	587864	3.19801	-128		chrVIII	392992	393933	2.78574	-71		chrXV	959842	960391	3.35715	65
chrVII	831969	832664	2.54094	-139		chrIX	431694	432782	3.19314	-127		chrIX	113047	114012	3.53329	-276		chrX	603942	604888	3.1709	-212		chrVIII	396595	397864	2.95169	-21		chrXV	960767	961183	3.21036	-12
chrVII	834303	836060	2.82432	-700		chrIX	435666	438267	3.55015	-984		chrIX	117346	118251	3.40347	-155		chrX	611855	612591	3.2122	-190		chrVIII	400536	401806	2.95257	-263		chrXV	994549	995251	2.63442	-45
chrVII	836985	837361	2.6963	31		chrX	3309	4504	5	2223		chrIX	134674	135517	3.40035	679		chrX	615032	615625	3.15548	-173		chrVIII	402602	403207	2.85381	-61		chrXV	996882	997326	2.84461	-109
chrVII	840095	840710	2.04831	2148		chrX	10476	12013	3.30941	-230		chrIX	139543	139955	3.44408	-3		chrX	617010	618382	3.11503	-362		chrVIII	406416	407406	2.92605	-192		chrXV	1002967	1003410	3.27543	36
chrVII	842312	842935	2.42066	-73		chrX	21849	23732	2.73459	-342		chrIX	142824	143399	3.27846	184		chrX	636529	638085	3.07428	277		chrVIII	416976	418020	2.93726	-51		chrXV	1009442	1010445	3.22472	-217
chrVII	843373	844195	3.85247	-70		chrX	27898	28910	3.73927	1517		chrIX	148531	149399	3.49653	-256		chrX	640076	642182	3.07948	304		chrVIII	429045	429669	2.65146	-179		chrXV	1017201	1017762	4.3585	170
chrVII	845194	845596	2.09749	1010		chrX	36321	38221	3.5814	-71		chrIX	149730	150712	3.46699	-233		chrX	643827	644593	3.20561	-109		chrVIII	436746	437505	2.90422	-178		chrXV	1033991	1034458	3.55926	-43
chrVII	846141	846684	1.7688	-8		chrX	40963	41636	3.10187	-117		chrIX	151157	151902	3.43209	-65		chrX	646293	646679	3.16955	4		chrVIII	438810	439695	2.71086	-89		chrXV	1036088	1036957	4.32509	-52
chrVII	848631	850030	2.25094	611		chrX	47165	47714	3.05608	-7		chrIX	155674	156347	3.49263	-34		chrX	655718	656224	3.04902	-8		chrVIII	439982	440880	2.87566	54		chrXV	1076288	1077210	5	-35
chrVII	850439	851201	2.05244	-384		chrX	49415	50617	2.99661	-81		chrIX	169511	170213	3.25023	-221		chrX	658416	659062	3.18479	-50		chrVIII	441699	442534	2.92834	-64		chrXV	1087415	1088026	3.80135	2248
chrVII	853192	853824	2.62963	-293		chrX	52896	53633	3.915	-76		chrIX	171265	172042	3.50685	-97		chrX	667073	668014	2.96105	-100		chrVIII	443261	444249	2.88881	-73		chrXVI	2981	3958	2.60324	2044
chrVII	854663	855423	3.3609	-148		chrX	54211	54693	4.316	73		chrIX	173274	174109	3.24928	-100		chrX	672481	673163	3.08173	-169		chrVIII	445208	445909	2.84122	-154		chrXVI	13919	14842	4.94515	-26
chrVII	857579	858524	2.29336	-235		chrX	59224	61078	4.23506	31		chrIX	179941	180658	3.00927	-61		chrX	675587	676048	3.19041	34		chrVIII	447879	448690	2.82334	-50		chrXVI	32819	33328	4.3404	61
chrVII	865919	866472	1.42409	-443		chrX	63209	64076	4.36845	-162		chrIX	182775	183350	3.27465	64		chrX	676612	677252	3.18685	-39		chrVIII	453676	454912	2.83596	65		chrXVI	34755	35506	2.62328	-105
chrVII	867227	868032	3.94766	-110		chrX	70968	71777	4.37466	7		chrIX	188522	189312	3.46547	-133		chrX	678290	678826	3.11981	148		chrVIII	458249	458726	2.85291	-811		chrXVI	38829	39433	4.45891	10
chrVII	871157	872017	3.2823	-171		chrX	82379	84325	4.90013	-96		chrIX	192877	193752	3.5293	-120		chrX	684410	684807	3.20201	42		chrVIII	459095	459655	2.81023	76		chrXVI	52397	53222	2.94682	-139
chrVII	885569	886199	2.32735	-143		chrX	85492	86006	3.59281	3		chrIX	201861	202509	3.40383	-142		chrX	695477	696179	3.11836	-78		chrVIII	465971	467391	2.90693	-251		chrXVI	67467	68009	4.99843	13
chrVII	888527	889038	2.7718	-99		chrX	88232	89025	4.70362	-69		chrIX	203016	203685	3.1023	-92		chrX	700365	701150	3.1938	-124		chrVIII	468019	468977	2.94134	279		chrXVI	69095	69688	3.55721	-93
chrVII	891966	892610	3.31531	-102		chrX	89787	90204	2.88035	101		chrIX	207032	207922	1.54928	1842		chrX	703958	704287	2.95604	-73		chrVIII	480395	481395	2.8469	-95		chrXVI	85044	85873	3.87193	-127
chrVII	897062	897770	3.28963	-86		chrX	94133	95263	5	-168		chrIX	211644	212762	3.25151	-198		chrX	710397	711741	3.0655	-1362		chrVIII	483529	484729	2.95109	101		chrXVI	87650	88715	3.10139	-150
chrVII	901962	903442	3.30609	-432		chrX	96258	97816	3.73672	-508		chrIX	215841	216894	3.42964	-290		chrX	717029	718383	3.07694	126		chrVIII	486335	487237	2.84183	-40		chrXVI	100253	100800	3.59398	31
chrVII	908985	909308	1.86121	27		chrX	104241	105204	2.69315	-291		chrIX	220597	221243	3.43582	-220		chrX	721532	722050	3.15802	-1024		chrVIII	487837	489453	2.87457	-12		chrXVI	102608	103458	2.92201	-199
chrVII	910246	910661	2.72127	22		chrX	109166	110092	3.32443	-168		chrIX	226029	226434	3.19316	-278		chrX	728483	730271	3.21409	219		chrVIII	490158	490817	2.91123	-259		chrXVI	120959	121936	3.94105	-281
chrVII	911474	912130	2.70613	-81		chrX	112945	113550	3.73502	85		chrIX	229769	230345	3.22856	-63		chrX	733589	734492	3.08252	1601		chrVIII	491670	492277	2.90669	43		chrXVI	125485	126142	4.22273	-192
chrVII	914546	915428	1.9516	-249		chrX	114956	115779	2.07774	261		chrIX	230807	231684	3.47386	-174		chrX	736184	737130	3.0419	613		chrVIII	493369	494363	2.9064	-30		chrXVI	129610	130328	2.44639	-193
chrVII	921311	922422	3.84272	-308		chrX	128692	129344	2.94271	-66		chrIX	235288	235950	3.36677	-145		chrX	737467	738416	3.06831	1874		chrVIII	496939	497582	2.87334	19		chrXVI	138434	138992	3.44658	15
chrVII	924183	924940	3.45176	-100		chrX	142194	143527	3.97877	-294		chrIX	237457	238419	3.51908	-178		chrXI	5276	6071	3.16392	-54		chrVIII	498316	499336	2.92107	33		chrXVI	142869	143594	4.68983	-61
chrVII	931767	932401	2.59856	-457		chrX	146689	147426	4.76215	-43		chrIX	239383	241060	3.46218	486		chrXI	23693	25514	3.21214	-611		chrVIII	500841	501674	2.80274	-115		chrXVI	146930	147700	3.30025	-101
chrVII	936579	937416	4.00332	-115		chrX	150380	151234	3.41648	-154		chrIX	241558	242499	3.24992	86		chrXI	30442	31191	3.02631	-130		chrVIII	501941	502897	2.93252	31		chrXVI	152911	153897	5	-91
chrVII	938274	939226	2.1235	242		chrX	154853	155289	3.39732	-380		chrIX	245280	245917	3.50871	-40		chrXI	31476	31863	3.01133	23		chrVIII	506038	506629	2.87753	15		chrXVI	155896	156417	3.83333	55
chrVII	939792	940208	2.74146	77		chrX	157849	158441	3.01501	-43		chrIX	246727	248809	3.52315	628		chrXI	33904	34568	3.20474	-129		chrVIII	508569	509236	2.87254	-460		chrXVI	172513	172954	3.01624	21
chrVII	944508	945419	3.23663	-181		chrX	165027	165520	3.15387	74		chrIX	250906	251428	3.35232	1176		chrXI	47781	48431	3.1934	-88		chrVIII	512371	512701	2.85881	-196		chrXVI	175881	176432	2.77695	-66
chrVII	946974	947621	3.41409	-122		chrX	186390	187095	2.45551	-64		chrIX	259818	261435	3.4326	469		chrXI	49541	50321	3.11631	-120		chrVIII	515974	517729	2.94311	-367		chrXVI	190707	191690	4.23089	-207
chrVII	951539	952219	2.0102	-15		chrX	187456	188095	4.15523	-132		chrIX	273609	274316	3.48052	-117		chrXI	53451	54018	3.08054	31		chrVIII	521412	523381	2.87522	-660		chrXVI	202282	202686	3.03708	52
chrVII	953223	954243	3.54928	-227		chrX	189134	190103	4.38983	-97		chrIX	276034	276774	3.46894	-112		chrXI	63193	63700	3.14857	-88		chrVIII	528635	531306	2.92713	4579		chrXVI	204851	205520	2.3922	-62
chrVII	961843	963371	3.0181	210		chrX	190594	192755	3.06141	36		chrIX	277443	278702	3.46066	350		chrXI	75330	75964	3.17483	-113		chrVIII	532584	535006	2.82608	4299		chrXVI	218108	218896	2.76426	-128
chrVII	965518	965836	1.91659	-22		chrX	204988	205452	1.75125	-85		chrIX	282633	283486	3.52955	-408		chrXI	78354	78965	3.18473	-14		chrVIII	542473	543655	2.81333	56		chrXVI	222643	223362	3.13978	-140
chrVII	981725	982630	3.9508	-110		chrX	207340	208114	4.09032	-150		chrIX	284884	285667	3.41018	-277		chrXI	80372	81405	2.77444	-146		chrVIII	550514	552322	2.88262	81		chrXVI	245912	246471	4.16481	28
chrVII	983925	985106	3.79068	-244		chrX	217097	217474	2.74599	23		chrIX	288738	289416	3.47564	-169		chrXI	84448	84876	3.13028	-42		chrVIII	553502	554268	2.89224	-511		chrXVI	251591	252354	4.05514	-305
chrVII	987628	989899	3.1223	715		chrX	223321	224117	4.42213	-1336		chrIX	289858	290427	3.36196	-54		chrXI	88304	89017	3.18466	125		chrVIII	557309	557689	2.89138	-457		chrXVI	264793	265288	3.21241	13
chrVII	990176	990796	3.87195	2437		chrX	226888	227885	3.79475	60		chrIX	292367	292760	3.26125	-69		chrXI	93012	93672	2.99343	-44		chrVIII	558557	559361	2.74507	945		chrXVI	267245	268267	4.51514	-221
chrVII	994976	997147	3.86913	423		chrX	245328	246722	3.92799	434		chrIX	299757	300221	3.50743	20		chrXI	112253	112844	3.10917	-46		chrIX	3610	4303	2.67672	2190		chrXVI	280210	280741	3.17741	-4
chrVII	1007101	1007733	3.2933	-112		chrX	247038	247647	3.22222	88		chrIX	301087	302098	3.42176	-336		chrXI	122049	122743	3.20409	-121		chrIX	6183	6679	2.90363	-284		chrXVI	288835	289534	4.0113	-151
chrVII	1010512	1010899	2.75414	60		chrX	256476	257673	5	-263		chrIX	303347	304652	3.35148	104		chrXI	125289	126042	3.1263	-93		chrIX	10491	12117	2.81952	-188		chrXVI	292108	292626	4.10824	60
chrVII	1016509	1017183	3.02251	-96		chrX	262248	262900	4.01413	-22		chrIX	307662	308236	3.43087	-20		chrXI	126757	127697	3.12938	-248		chrIX	15404	18727	2.65629	-1194		chrXVI	305014	305580	3.78079	-1
chrVII	1017529	1019356	2.07206	-684		chrX	264787	265320	3.02474	-3		chrIX	308966	309438	3.19758	-31		chrXI	130364	130922	3.20992	9		chrIX	30548	32137	2.95211	1223		chrXVI	310054	310461	2.40351	48
chrVII	1017529	1019356	2.07206	-684		chrX	272246	273083	3.54462	-162		chrIX	310114	311346	3.4956	-304		chrXI	133157	134655	1.78347	228		chrIX	32677	33337	2.95386	-441		chrXVI	313090	313537	2.98218	-74
chrVII	1021715	1022880	2.99311	-358		chrX	277893	279189	3.51594	-300		chrIX	312619	313201	3.47828	5		chrXI	145741	146316	3.13142	45		chrIX	34574	35413	2.93793	-308		chrXVI	318899	319557	4.42507	-283
chrVII	1025656	1027462	2.60633	-77		chrX	284891	285653	4.27918	-1		chrIX	314502	315492	3.42537	-96		chrXI	148641	149122	3.20933	-44		chrIX	37134	37996	2.95307	180		chrXVI	320587	320978	2.16799	-16
chrVII	1031427	1032026	2.7478	-64		chrX	291511	292307	3.71569	-1135		chrIX	320743	321772	3.36783	-196		chrXI	152873	153606	3.21393	-29		chrIX	38773	39925	2.93711	-84		chrXVI	321910	322361	2.94064	65
chrVII	1038004	1039016	3.11299	-9		chrX	295022	295535	4.58715	34		chrIX	331750	332707	3.47453	213		chrXI	161146	161826	3.10678	-115		chrIX	41324	42277	2.87594	-24		chrXVI	326029	326868	3.62681	-179
chrVII	1042824	1043527	3.9867	-81		chrX	302473	303356	3.45298	-66		chrIX	333137	335191	3.38144	437		chrXI	176161	177100	3.13981	-150		chrIX	47209	48504	2.88724	167		chrXVI	335561	336292	3.46015	-21
chrVII	1045197	1045844	2.15129	-41		chrX	305501	306523	3.70009	-120		chrIX	335926	336367	3.36768	65		chrXI	188445	189122	3.0265	-144		chrIX	54740	55533	2.90476	-61		chrXVI	354993	355856	4.62867	-13
chrVII	1046272	1047028	2.34117	-81		chrX	310405	311119	2.73174	-125		chrIX	341777	342827	3.51966	-234		chrXI	191234	191886	3.04407	-118		chrIX	56236	57152	2.8329	149		chrXVI	359104	359586	3.73038	61
chrVII	1051374	1052282	4.96929	-103		chrX	312362	313190	4.79196	-70		chrIX	343442	344361	3.53608	-160		chrXI	192791	193454	3.16207	-53		chrIX	60435	61195	2.77215	-121		chrXVI	359916	360602	4.43741	46
chrVII	1059803	1060442	3.98006	-83		chrX	313460	317897	4.88688	-122		chrIX	345251	345888	3.30984	-122		chrXI	194332	195366	3.10235	17		chrIX	62484	63225	2.78295	-127		chrXVI	366554	367098	1.48978	-91
chrVII	1061405	1062087	2.11555	-156		chrX	319520	320278	3.94669	-117		chrIX	348226	349388	3.46057	-302		chrXI	207865	208394	3.11846	-117		chrIX	67819	68357	2.94741	-21		chrXVI	370313	371186	2.86994	-87
chrVII	1064670	1067681	2.5865	-1236		chrX	322715	323654	4.28366	-201		chrIX	349821	350556	3.33976	-112		chrXI	212701	213216	3.14959	39		chrIX	73334	73905	2.94326	-167		chrXVI	386198	387294	3.82336	-300
chrVII	1068690	1070539	2.57651	-624		chrX	324771	325663	3.11293	253		chrIX	362853	363492	3.36116	-48		chrXI	222790	223422	3.14834	179		chrIX	75734	76536	2.8847	-362		chrXVI	423516	424168	2.76637	50
chrVII	1072418	1073803	3.8441	-2371		chrX	327090	328092	3.04858	282		chrIX	369673	370165	3.06753	-11		chrXI	236854	237615	3.18747	31		chrIX	77053	78273	2.46296	-380		chrXVI	429351	430113	2.96959	-116
chrVII	1075831	1078853	3.93798	743		chrX	334083	334594	3.67501	74		chrIX	373997	375735	1.34241	341		chrXI	242417	242881	3.18563	-66		chrIX	82769	83650	2.83758	-92		chrXVI	454645	455169	3.67328	83
chrVII	1079409	1081445	2.54831	-81		chrX	341976	342756	4.04478	-156		chrIX	378014	378841	1.53459	-58		chrXI	256163	256950	2.99696	-85		chrIX	88174	88998	2.91695	130		chrXVI	459707	460275	3.8537	28
chrVII	1082558	1083184	2.03254	-142		chrX	345639	346210	2.72449	-48		chrIX	384480	384884	3.3287	73		chrXI	261695	262348	3.17336	-255		chrIX	89446	90013	2.75865	-15		chrXVI	478755	479409	3.59805	-81
chrVII	1087094	1087760	4.11034	2018		chrX	351887	352676	3.24757	-104		chrIX	396700	397656	3.20877	-116		chrXI	269229	269812	3.12171	-62		chrIX	92487	93486	2.84139	-199		chrXVI	492723	493819	4.04712	-234
chrVIII	3052	4077	3.1262	-254		chrX	359400	359853	3.94849	49		chrIX	398139	399023	3.29541	67		chrXI	271522	272171	3.07935	-31		chrIX	96151	96753	2.88921	-77		chrXVI	497360	498228	3.47392	-302
chrVIII	4672	5279	2.9042	-435		chrX	365390	366060	4.18975	-59		chrIX	399285	400050	3.42851	-109		chrXI	273024	273681	2.86945	-41		chrIX	97179	98087	2.95464	238		chrXVI	506099	506792	2.94475	-134
chrVIII	5950	6603	1.31074	-124		chrX	373676	374353	3.7091	-216		chrIX	403213	403861	3.3222	-46		chrXI	274820	275460	3.20649	-143		chrIX	99875	102876	2.61592	859		chrXVI	513954	514510	2.39896	-54
chrVIII	10343	12388	4.90189	919		chrX	376631	378285	3.97136	796		chrIX	405595	407268	3.11132	-465		chrXI	281986	283040	3.17308	-184		chrIX	112899	114121	2.935	-273		chrXVI	516982	517881	1.46586	-219
chrVIII	12933	14321	3.41606	62		chrX	378572	379004	1.45126	-37		chrIX	408937	411124	3.28785	-776		chrXI	284728	285143	3.12759	-94		chrIX	114441	114983	2.86117	906		chrXVI	529097	529761	3.25138	-79
chrVIII	15574	16753	1.87036	497		chrX	380344	381137	3.12612	260		chrIX	422562	423316	3.43148	-74		chrXI	288596	289221	2.20473	64		chrIX	117206	118273	2.78007	-96		chrXVI	534432	535280	4.4219	-153
chrVIII	20845	21947	2.3199	-387		chrX	383709	384132	3.52161	84		chrIX	424418	427054	3.34524	-1223		chrXI	290815	291562	3.16003	-264		chrIX	125992	126464	2.89263	24		chrXVI	538660	539330	3.63497	-59
chrVIII	25264	26289	2.36908	-268		chrX	387177	388191	3.49959	27		chrIX	429024	430296	3.50543	2451		chrXI	294097	294773	3.18596	-127		chrIX	134694	135502	2.91429	681		chrXVI	543650	544848	2.18571	-382
chrVIII	32530	32888	1.75304	47		chrX	390641	390996	2.64608	34		chrIX	431936	432805	3.26184	-260		chrXI	295866	296700	3.11422	-90		chrIX	139561	139912	2.87832	-15		chrXVI	564772	565505	2.872	-98
chrVIII	33996	34703	2.84847	-273		chrX	393828	394224	3.98248	59		chrIX	435807	437495	3.30941	-668		chrXI	298941	299828	3.17532	-197		chrIX	142878	143416	2.76817	219		chrXVI	607014	607820	1.73603	-105
chrVIII	38224	38941	3.02843	-75		chrX	397947	398751	3.25836	49		chrIX	437763	438475	3.49622	-2136		chrXI	306829	308117	3.2052	188		chrIX	148411	150301	2.77369	632		chrXVI	609659	610451	5	-24
chrVIII	39177	39730	3.19294	32		chrX	402157	403422	3.53913	-107		chrX	6174	6654	3.35063	-284		chrXI	309985	310377	2.94886	-18		chrIX	151185	152033	2.92542	14		chrXVI	614266	614937	3.82533	-44
chrVIII	62325	63258	2.73725	-229		chrX	407184	407860	4.94927	-36		chrX	10366	11800	3.26536	-392		chrXI	313461	313875	3.19521	-1144		chrIX	155696	156471	2.87537	39		chrXVI	626751	627172	3.26151	5
chrVIII	69292	70495	2.86501	186		chrX	410639	411151	3.52963	145		chrX	15714	23299	3.50643	10		chrXI	314217	314781	3.15824	-313		chrIX	159962	160935	2.67292	-284		chrXVI	638639	639839	4.51212	-220
chrVIII	76950	77697	3.01076	-10		chrX	419197	419918	3.10587	4		chrX	27995	29888	3.43991	2055		chrXI	321477	321769	3.12463	-105		chrIX	169391	170192	2.94427	-151		chrXVI	653422	653993	4.21736	-46
chrVIII	78096	79012	2.69841	-201		chrX	421409	422159	3.81879	-121		chrX	37508	38221	3.44437	-140		chrXI	329271	329610	2.94695	2		chrIX	171065	172070	2.91129	-63		chrXVI	656207	657045	3.71399	-74
chrVIII	81388	82144	1.90029	-150		chrX	431853	433019	3.34988	-208		chrX	40914	41675	3.50331	-112		chrXI	329997	330356	3.11943	11		chrIX	173192	174139	2.82911	-74		chrXVI	664558	665284	2.48324	-39
chrVIII	83446	84176	2.0166	-90		chrX	434418	435291	3.25745	-204		chrX	47149	47808	3.32926	-46		chrXI	333680	334320	2.97	-31		chrIX	179805	180858	2.82546	-93		chrXVI	667170	667937	4.06867	-122
chrVIII	84875	85251	2.25619	-3		chrX	438366	439127	3.481	-118		chrX	52912	53583	3.50579	-93		chrXI	346456	347193	3.17921	-61		chrIX	182739	183351	2.89334	82		chrXVI	676725	677528	4.92103	-38
chrVIII	97820	99401	2.64387	184		chrX	442223	443096	3.50529	-107		chrX	54183	54694	3.52938	60		chrXI	348903	349701	3.07895	-161		chrIX	183638	184159	2.90023	-38		chrXVI	678045	678557	2.4172	19
chrVIII	101763	102860	3.11143	-300		chrX	445368	446098	4.10726	-190		chrX	63161	63979	3.47522	-235		chrXI	352465	354286	3.05049	-117		chrIX	187416	188238	2.76603	-195		chrXVI	689735	690307	4.07695	-86
chrVIII	108587	108916	1.66673	-60		chrX	448865	449540	4.35119	1		chrX	68539	68973	3.24373	26		chrXI	359719	360339	3.15227	-114		chrIX	188478	189392	2.87803	-131		chrXVI	704407	705046	3.42357	-71
chrVIII	111075	111404	1.64441	77		chrX	450402	451159	3.07618	-239		chrX	70915	71707	3.41462	-55		chrXI	371568	371993	3.14206	-48		chrIX	192845	194345	2.93545	0		chrXVI	706553	707217	3.26354	-87
chrVIII	127340	127991	2.02193	-114		chrX	458045	458784	2.96242	-54		chrX	82429	84320	3.52114	-73		chrXI	374198	374649	3.17511	-81		chrIX	195263	196448	2.8771	257		chrXVI	709562	710383	5	-128
chrVIII	129070	129717	1.74002	-87		chrX	459094	460750	3.44222	-460		chrX	85466	85944	3.51705	45		chrXI	375153	375757	3.20597	-1		chrIX	201825	202521	2.81766	-130		chrXVI	712611	713670	5	-113
chrVIII	131187	131938	3.5514	-117		chrX	461338	462059	2.79323	-130		chrX	88257	89022	3.41041	-80		chrXI	385571	386028	3.09018	42		chrIX	202946	203597	2.94103	-13		chrXVI	718258	718786	3.40462	-54
chrVIII	132590	132990	2.79232	743		chrX	462613	463020	1.47971	96		chrX	94211	95249	3.38616	-200		chrXI	391931	392705	2.94538	-39		chrIX	206366	208016	2.54228	1556		chrXVI	719049	719789	2.97377	-951
chrVIII	138266	138992	2.08526	-65		chrX	469363	470016	3.44055	-94		chrX	96236	97854	3.50557	-516		chrXI	393064	394034	3.17567	-172		chrIX	211551	212792	2.75419	-167		chrXVI	724730	725477	3.50703	40
chrVIII	143216	144251	3.04779	-176		chrX	470544	471284	2.24092	50		chrX	100715	101550	3.38184	-239		chrXI	396792	397429	3.05849	137		chrIX	215841	216901	2.90628	-287		chrXVI	730301	730714	1.83775	16
chrVIII	146380	147588	1.52968	1685		chrX	490566	491578	4.21027	-9		chrX	113059	113649	3.49342	-21		chrXI	398197	398807	3.03763	248		chrIX	220597	221174	2.84104	-186		chrXVI	736444	736903	3.50113	-241
chrVIII	149137	149535	2.39422	111		chrX	503161	504314	3.68553	-198		chrX	115185	115827	3.45904	123		chrXI	401763	402844	3.11221	-224		chrIX	223606	224625	2.77235	-1626		chrXVI	746328	747478	5	-68
chrVIII	151123	151873	2.37628	-168		chrX	507191	508192	3.18094	-54		chrX	128710	129297	3.37601	-52		chrXI	403586	404483	2.93173	-67		chrIX	226046	226414	2.90104	-276		chrXVI	751639	752402	3.86594	-102
chrVIII	158931	159719	3.71675	-113		chrX	513545	514384	4.15618	-90		chrX	140022	140704	3.40539	-74		chrXI	416594	417204	2.94459	14		chrIX	229753	230370	2.89328	-68		chrXVI	791971	792960	3.84151	-221
chrVIII	160266	161077	4.43721	-172		chrX	521895	522287	3.88112	43		chrX	142360	143337	3.40867	-282		chrXI	417759	418536	3.17734	-125		chrIX	230765	231587	2.94921	-104		chrXVI	796909	797867	3.79337	-169
chrVIII	172569	173498	3.99324	-64		chrX	524694	525423	1.3937	322		chrX	146728	147421	3.44681	-26		chrXI	425712	426548	3.02339	-112		chrIX	235226	235959	2.91112	-119		chrXVI	801688	802621	2.25782	-204
chrVIII	177621	178492	3.14438	-58		chrX	528212	528981	3.36374	-100		chrX	150477	151141	3.47008	-152		chrXI	429171	429509	2.92379	38		chrIX	237381	238417	2.9202	-139		chrXVI	817750	818755	5	-70
chrVIII	179743	180792	3.78798	-77		chrX	529436	530163	2.37547	-61		chrX	154767	155246	3.32511	-316		chrXI	430367	430994	3.1926	-49		chrIX	241557	242558	2.93071	115		chrXVI	821102	821638	3.71806	53
chrVIII	187496	188277	4.42601	-37		chrX	531945	532367	1.75519	94		chrX	155938	156527	3.31947	64		chrXI	434536	435654	3.06216	-218		chrIX	246667	247723	2.94489	-280		chrXVI	826313	826773	3.25748	16
chrVIII	188873	190727	3.18806	64		chrX	533712	534359	3.29878	9		chrX	157786	158433	3.29177	-78		chrXI	437234	437930	3.19755	-90		chrIX	259907	261584	2.94331	588		chrXVI	868003	868415	2.85095	95
chrVIII	201008	201818	3.43086	-103		chrX	535486	536119	2.0325	-253		chrX	165088	165603	3.47755	2		chrXI	442463	443381	2.99647	-200		chrIX	273548	274281	2.94238	-69		chrXVI	869684	870966	4.15659	-370
chrVIII	212316	216228	5	-23		chrX	540001	541019	2.29648	1738		chrX	184002	184800	3.44388	-100		chrXI	450908	452460	2.91163	250		chrIX	275929	276789	2.87065	-67		chrXVI	882475	884113	3.87797	24
chrVIII	218782	219195	1.98271	-146		chrX	542378	542843	3.65566	-109		chrX	186392	187090	3.47607	-62		chrXI	460996	461532	3.18226	-25		chrIX	277558	278813	2.92442	-240		chrXVI	885558	886051	2.60768	9
chrVIII	219674	221732	2.92488	-22		chrX	544956	545404	2.34138	-5		chrX	187504	188040	3.4991	-128		chrXI	462570	462916	3.17265	-47		chrIX	282551	283682	2.72386	-465		chrXVI	891699	892491	2.9282	-17
chrVIII	223472	224083	3.99158	-20		chrX	554468	556215	4.65216	147		chrX	189194	190161	3.35265	-38		chrXI	463433	463975	3.1613	-255		chrIX	288645	289434	2.79126	-132		chrXVI	899425	900874	2.75373	-44
chrVIII	224989	225330	1.79208	9		chrX	558875	559665	4.14291	-112		chrX	190782	192733	3.46583	119		chrXI	465988	466686	3.15759	-266		chrIX	289838	290402	2.89302	-31		chrXVI	910662	911611	4.76922	-115
chrVIII	226886	227313	3.02621	41		chrX	567068	567935	4.32443	-58		chrX	207354	208168	3.49319	-116		chrXI	469554	469940	3.20805	30		chrIX	292370	292801	2.92961	-47		chrXVI	912134	912928	4.34655	-52
chrVIII	228712	229709	4.15915	-124		chrX	568870	569728	3.49636	100		chrX	211479	212183	3.24071	-254		chrXI	473219	473676	3.04507	-99		chrIX	299598	300263	2.67815	78		chrXVI	944159	944896	3.00347	-75
chrVIII	234305	235189	3.87623	-89		chrX	571511	572202	2.19999	267		chrX	217036	217719	3.36306	-69		chrXI	477645	479384	1.66796	177		chrIX	301081	302237	2.86572	-402
chrVIII	235854	236138	1.83116	516		chrX	576358	576794	3.79134	25		chrX	219644	220268	3.33186	60		chrXI	482891	483651	3.13256	-132		chrIX	302689	304672	2.84323	423
chrVIII	237952	239538	2.641	-353		chrX	583201	583956	4.17878	-42		chrX	223264	224125	3.34118	-1360		chrXI	486915	488253	1.54961	-186		chrIX	307554	308141	2.92437	81
chrVIII	241284	242775	2.80889	366		chrX	587120	588059	3.67017	-128		chrX	226844	227883	3.52352	37		chrXI	489378	490255	3.13578	-162		chrIX	308952	309530	2.92228	-70
chrVIII	245783	246446	3.50091	-78		chrX	603928	605835	3.86668	-679		chrX	230880	231511	3.42611	-105		chrXI	491121	491630	3.15896	12		chrIX	310063	311369	2.94016	-290
chrVIII	249430	250149	2.8806	-149		chrX	609272	611535	3.2035	631		chrX	245235	246715	2.42368	384		chrXI	493386	494190	3.07456	-469		chrIX	312590	313385	2.84707	83
chrVIII	250593	251738	2.97201	65		chrX	611875	612647	3.61729	-152		chrX	246989	247554	3.31219	17		chrXI	499495	500527	2.98099	-178		chrIX	314236	316333	2.86389	192
chrVIII	255566	256587	2.90643	-283		chrX	614833	615946	2.99445	-186		chrX	256506	257690	1.53943	-286		chrXI	506235	507068	3.1866	135		chrIX	320707	321851	2.72111	-175
chrVIII	261508	262938	3.16933	330		chrX	616902	617841	3.14117	-38		chrX	264855	265436	3.41662	-95		chrXI	507765	508249	3.20015	68		chrIX	333240	335326	2.93135	556
chrVIII	266874	267726	2.0812	-238		chrX	618094	618477	2.28911	52		chrX	272268	273019	3.47698	-159		chrXI	510353	511095	3.16574	-91		chrIX	335912	336381	2.82344	65
chrVIII	272267	272917	3.57528	-35		chrX	624691	625179	2.60147	97		chrX	277971	279085	3.48738	-313		chrXI	511484	511919	2.85086	95		chrIX	342132	342824	2.85968	-58
chrVIII	273707	274754	3.51224	57		chrX	628459	629366	3.08453	201		chrX	284967	285670	3.53238	-48		chrXI	512742	513365	2.9604	105		chrIX	343377	344510	2.8898	-118
chrVIII	276404	277014	2.34599	-55		chrX	636466	638145	3.47692	276		chrX	291487	292249	3.41144	-1094		chrXI	521470	522179	3.15429	-113		chrIX	345233	345885	2.87875	-133
chrVIII	277496	278280	3.64773	-265		chrX	638665	639094	3.22681	95		chrX	295001	295537	3.39023	24		chrXI	526294	527937	3.00181	115		chrIX	348172	349383	2.83875	-273
chrVIII	281021	281852	3.36281	-58		chrX	640096	642221	3.99648	334		chrX	302465	303374	3.51596	-71		chrXI	530531	531076	3.21488	-142		chrIX	349867	350581	2.86766	-77
chrVIII	283014	283499	3.50811	41		chrX	643763	644509	4.09314	-35		chrX	305571	306448	3.50168	-122		chrXI	547705	548504	2.88709	-111		chrIX	353309	353784	2.79514	-116
chrVIII	284318	285017	4.03721	-43		chrX	646282	646654	3.29433	22		chrX	312324	313112	3.33094	-12		chrXI	549286	549969	1.75591	180		chrIX	356688	357316	2.90705	-107
chrVIII	286367	287258	2.63175	-43		chrX	653733	654409	3.24487	167		chrX	314685	317679	3.41773	293		chrXI	551422	551965	3.12312	37		chrIX	360259	361161	2.74679	-175
chrVIII	301691	302963	2.4385	-393		chrX	655690	656278	4.13912	-21		chrX	319555	320294	3.52181	-91		chrXI	554447	555136	3.19943	-195		chrIX	363068	363554	2.76775	90
chrVIII	314357	315332	2.59221	-172		chrX	658385	659147	3.75029	-77		chrX	322541	323570	3.52441	-330		chrXI	559409	559910	3.19231	-6		chrIX	364585	365155	2.82761	-19
chrVIII	315597	316687	3.93153	-174		chrX	664222	665362	2.91528	227		chrX	324697	325390	3.50274	80		chrXI	561973	562679	3.03391	-29		chrIX	369660	370164	2.92518	-4
chrVIII	324453	324990	1.8913	-44		chrX	666770	668055	3.90212	-231		chrX	327359	328099	3.39488	144		chrXI	565525	566531	2.95144	-136		chrIX	373672	375993	2.80153	308
chrVIII	327782	328564	3.66223	-130		chrX	669376	669712	1.99684	22		chrX	333979	334539	3.52896	-6		chrXI	566920	568115	3.17069	-320		chrIX	377966	378973	2.61025	-16
chrVIII	331903	333308	2.52746	324		chrX	672441	673379	2.96013	-81		chrX	341905	342848	3.48522	-145		chrXI	570642	571094	2.9066	41		chrIX	379520	379970	2.87079	639
chrVIII	335565	336569	2.19654	-270		chrX	675535	676041	2.54584	64		chrX	345470	346171	3.11212	-152		chrXI	577947	578421	3.21109	-61		chrIX	380872	381341	2.93783	21
chrVIII	337686	338264	2.11455	-108		chrX	676471	677306	3.76873	-82		chrX	351950	352638	3.42954	-92		chrXI	579025	579473	3.10139	40		chrIX	384494	384927	2.86788	102
chrVIII	341189	342747	3.5225	303		chrX	677800	679023	3.39312	294		chrX	355761	358227	3.42934	970		chrXI	580016	580638	3.20464	115		chrIX	396445	400173	2.82157	-205
chrVIII	345284	346159	3.79468	-94		chrX	684436	684904	2.35267	103		chrX	365354	366080	3.46717	-67		chrXI	584680	585222	3.21348	-1		chrIX	403161	403963	2.95439	-71
chrVIII	349234	350040	4.14628	63		chrX	695404	696251	4.34628	-78		chrX	373656	374372	3.39826	-215		chrXI	592240	593116	3.04556	-138		chrIX	405298	407228	2.73778	-296
chrVIII	352294	352935	2.30499	-141		chrX	696637	697689	3.10486	22		chrX	374696	378934	3.41236	153		chrXI	596524	597122	3.19323	-1		chrIX	409410	411175	2.91464	-514
chrVIII	353208	353808	2.05969	-117		chrX	700360	701184	3.77294	-110		chrX	383643	384221	3.46102	95		chrXI	604021	604527	2.9942	-42		chrIX	422518	423362	2.95316	-75
chrVIII	357613	358450	1.79073	-826		chrX	703622	704324	2.13752	88		chrX	387179	388448	3.41167	157		chrXI	605238	605825	3.1601	-114		chrIX	424340	426188	2.89497	-751
chrVIII	358923	361205	5	117		chrX	710023	711867	3.55335	-1238		chrX	390651	391019	3.39973	18		chrXI	608180	609251	3.14391	-230		chrIX	428995	430107	2.92911	2560
chrVIII	361624	362329	1.4162	-138		chrX	716996	718507	3.36632	172		chrX	393692	394264	3.41133	11		chrXI	619476	619928	3.19334	-103		chrIX	431699	432812	2.64311	-145
chrVIII	363925	364879	4.2194	-249		chrX	721542	722086	3.07196	-1001		chrX	398057	398783	3.39801	-22		chrXI	631567	632457	3.10373	860		chrIX	435718	437430	2.94124	-591
chrVIII	367747	368430	2.37865	-197		chrX	728435	730951	4.05972	-97		chrX	402254	403715	3.51456	88		chrXI	634925	635918	3.08383	-243		chrIX	437765	438301	2.91088	-2050
chrVIII	369610	370242	1.77851	-128		chrX	733586	734683	4.16887	1695		chrX	407213	407846	3.42495	-28		chrXI	640011	640829	3.06802	-120		chrX	6170	6657	2.92512	-284
chrVIII	371372	372056	2.58793	-35		chrX	735631	738678	4.16986	1111		chrX	410689	411170	3.48842	110		chrXI	650015	650757	3.21352	-2694		chrX	10494	12072	2.72984	-192
chrVIII	374106	375950	4.00162	72		chrXI	5121	6888	3.2359	-102		chrX	419285	419890	3.39348	-26		chrXI	658218	658985	3.21097	1766		chrX	15380	21151	2.41158	23
chrVIII	380041	381710	3.80966	304		chrXI	23461	25426	2.4731	-771		chrX	421397	422185	3.4418	-128		chrXII	3293	3946	3.16165	681		chrX	22483	23354	2.81123	-214
chrVIII	383321	383721	1.73274	-17		chrXI	30372	31934	3.24129	-466		chrX	431873	432908	3.06461	-191		chrXII	8839	9498	3.09571	667		chrX	25312	27037	2.83155	-89
chrVIII	384590	385353	2.16107	-538		chrXI	33825	34630	3.74098	-121		chrX	434385	435292	3.49836	-188		chrXII	15703	16711	3.14747	-135		chrX	27637	29808	2.88625	1836
chrVIII	385998	387545	4.1484	-461		chrXI	44624	45610	2.9165	1178		chrX	438372	439172	3.48474	-93		chrXII	40188	41002	2.90191	-71		chrX	37576	38255	2.91243	-89
chrVIII	388420	388871	2.6028	80		chrXI	46943	47522	2.43576	76		chrX	442237	443146	3.52233	-139		chrXII	46218	46947	3.16991	-89		chrX	40866	41633	2.89679	-67
chrVIII	389557	390495	4.36624	-274		chrXI	47806	48548	4.35734	-17		chrX	445360	446078	3.47394	-204		chrXII	49062	50170	3.09594	-322		chrX	47113	47586	2.92856	83
chrVIII	393043	393906	4.55121	-59		chrXI	49481	50288	4.2232	-76		chrX	448360	449537	3.4135	-191		chrXII	63494	63880	3.2128	-42		chrX	52836	53673	2.8618	-86
chrVIII	396534	397584	2.96295	-192		chrXI	53506	53994	4.20142	46		chrX	450337	451231	3.41552	-236		chrXII	65723	67030	3.17761	141		chrX	54172	54740	2.94361	77
chrVIII	400599	401744	3.20937	-262		chrXI	63173	63700	3.46699	-78		chrX	455282	455900	3.39751	-648		chrXII	67977	69134	2.8245	-24		chrX	63111	64076	2.78924	-211
chrVIII	402522	403236	3.46773	-87		chrXI	73431	74477	2.32756	-89		chrX	457974	458793	3.44467	-23		chrXII	72780	73780	1.53368	-129		chrX	68475	68958	2.88415	65
chrVIII	405927	407307	4.54268	-486		chrXI	75281	76020	4.23008	-117		chrX	459214	460674	3.2534	-438		chrXII	76524	77182	3.12929	-106		chrX	70995	71901	2.85745	82
chrVIII	411778	413300	1.72264	-133		chrXI	78250	78981	2.81185	30		chrX	461294	462048	3.42726	-158		chrXII	79994	80410	3.20037	3		chrX	72673	73522	2.72191	316
chrVIII	417048	417806	2.70194	-122		chrXI	80286	81355	4.99521	-214		chrX	466820	467513	3.31302	-134		chrXII	98636	99513	2.98071	-239		chrX	79139	80329	2.59514	-421
chrVIII	429047	429726	2.63316	-209		chrXI	84447	84980	3.6399	10		chrX	469363	470005	3.50006	-100		chrXII	99882	101135	1.51336	-308		chrX	82300	84421	2.84069	-87
chrVIII	436835	437536	3.22539	-238		chrXI	88278	89342	2.7769	-24		chrX	485984	486403	3.34453	2		chrXII	109080	109463	3.15303	-300		chrX	85472	86022	2.94561	5
chrVIII	438820	439615	3.69014	-124		chrXI	93037	93633	4.06715	-37		chrX	490561	491413	3.51786	-94		chrXII	111208	112413	3.05445	-236		chrX	88210	89066	2.89026	-78
chrVIII	439995	440687	2.59926	-36		chrXI	112263	112924	4.13054	-91		chrX	503207	504194	3.53617	-235		chrXII	114114	114886	3.18356	-1932		chrX	89838	90208	2.87932	74
chrVIII	441694	442469	2.86202	-99		chrXI	122031	122842	2.96586	-80		chrX	507192	508008	3.40763	-146		chrXII	121120	121597	3.20375	37		chrX	93959	95313	2.57825	-106
chrVIII	443190	444168	4.25093	-149		chrXI	125271	126014	3.49233	-116		chrX	513499	514351	3.50317	-130		chrXII	130474	132420	1.95437	-33		chrX	96246	97786	2.78877	-487
chrVIII	447848	448615	4.37845	-103		chrXI	126886	127745	3.52722	-159		chrX	517214	518622	3.45052	-405		chrXII	136051	136755	2.95535	58		chrX	100754	101475	2.85817	-221
chrVIII	456200	456908	2.34359	-37		chrXI	130241	130924	3.6132	-51		chrX	518961	519381	3.37985	14		chrXII	140916	141496	3.07313	133		chrX	104211	105152	2.93843	-254
chrVIII	459112	459585	2.84392	50		chrXI	133098	134620	3.2377	275		chrX	521871	522259	3.42283	17		chrXII	142803	143476	3.1377	-61		chrX	109176	109964	2.85034	-109
chrVIII	463976	465654	2.21549	-363		chrXI	145420	146388	3.76118	170		chrX	524274	525579	3.51264	454		chrXII	156004	156603	3.10616	30		chrX	112860	113593	2.92906	106
chrVIII	465954	467399	2.00048	-255		chrXI	148558	149270	3.85822	-76		chrX	528287	528931	3.43502	-88		chrXII	157540	158421	3.09419	-251		chrX	114812	115832	2.92251	307
chrVIII	468054	469059	2.49926	338		chrXI	152431	153651	3.64904	-228		chrX	529444	530146	3.20559	-66		chrXII	159635	160310	3.21356	-76		chrX	128645	129172	2.79172	43
chrVIII	472748	474454	2.48014	857		chrXI	153960	155767	3.55575	-127		chrX	533804	534286	3.46859	18		chrXII	163852	165002	3.13325	35		chrX	140000	140747	2.94356	-63
chrVIII	480495	481242	3.79737	-121		chrXI	161058	161825	4.37341	-100		chrX	537763	539127	3.46262	-327		chrXII	165867	166632	3.17525	-167		chrX	142192	143396	2.94119	-227
chrVIII	483627	484742	2.81399	157		chrXI	168499	168900	2.29401	129		chrX	540047	541366	3.40335	1795		chrXII	167490	167997	3.16271	58		chrX	146844	147477	2.86243	60
chrVIII	486366	487111	2.92046	-87		chrXI	175954	177087	4.26183	-40		chrX	542368	542885	3.52077	-125		chrXII	168763	169359	3.13562	-42		chrX	150429	151172	2.79095	-160
chrVIII	487967	488947	4.27477	-200		chrXI	188324	189203	4.13816	-124		chrX	554539	556200	3.27954	175		chrXII	174316	175566	3.13595	41		chrX	154846	155244	2.87378	-354
chrVIII	490107	490784	2.15031	-301		chrXI	191207	191939	2.67528	-131		chrX	558887	559630	3.4661	-101		chrXII	176991	178291	3.17504	33		chrX	157956	158480	2.82514	30
chrVIII	491663	492286	4.45612	44		chrXI	192692	193534	2.6842	-43		chrX	567116	567900	3.39576	-64		chrXII	179207	180256	3.16123	-126		chrX	165034	165543	2.9482	59
chrVIII	493371	494222	3.80691	-99		chrXI	194193	195476	4.01695	31		chrX	569022	569777	3.44001	-1		chrXII	183175	183929	3.18941	-71		chrX	183941	184863	2.84279	-99
chrVIII	496986	497625	2.01447	-26		chrXI	200026	200611	1.45834	-152		chrX	576355	576906	3.50785	-30		chrXII	193046	194686	3.05064	-585		chrX	186333	187111	2.90493	-43
chrVIII	500924	502619	2.9509	-616		chrXI	203194	203804	2.09089	-42		chrX	583216	583976	3.44825	-59		chrXII	196271	196988	3.14029	-158		chrX	187396	188133	2.92043	-121
chrVIII	506017	506583	3.42002	-19		chrXI	210078	210933	2.18051	-87		chrX	584781	586295	3.49962	-101		chrXII	197845	198201	3.09953	62		chrX	188964	190282	2.90428	-93
chrVIII	508459	509209	2.59292	-529		chrXI	212701	213371	4.15808	-38		chrX	587135	587904	3.52151	-147		chrXII	202768	203551	3.1357	-130		chrX	190636	192728	2.70468	43
chrVIII	512374	512701	2.48929	-194		chrXI	213690	214371	2.69165	-111		chrX	594363	594707	3.25738	-208		chrXII	204547	205236	3.17963	-99		chrX	193593	194211	2.86473	971
chrVIII	516145	517752	3.69741	-464		chrXI	218714	219583	2.99877	23		chrX	603956	606962	3.51822	192		chrXII	214120	214832	3.12114	-20		chrX	197485	198351	2.87043	3
chrVIII	521418	523328	3.60615	-636		chrXI	222755	223424	2.63214	-190		chrX	611856	612657	3.45645	-156		chrXII	237572	237885	3.14013	-26		chrX	207428	208228	2.94272	-49
chrVIII	534420	535028	3.03806	3370		chrXI	236811	237595	3.08557	63		chrX	614975	615805	3.4857	-186		chrXII	241444	241839	3.18823	-235		chrX	211474	212263	2.81906	-292
chrVIII	543142	543661	3.78124	394		chrXI	242372	242902	3.90042	-54		chrX	617022	618411	3.30746	-383		chrXII	248440	249862	2.74585	-725		chrX	216982	217739	2.85592	-52
chrVIII	553487	555306	5	1		chrXI	261560	262400	4.14196	-297		chrX	628505	629277	3.2752	179		chrXII	254942	255590	3.06308	-40		chrX	223375	224119	2.88783	-1308
chrVIII	557318	557667	2.51918	-451		chrXI	269168	269821	3.72321	-36		chrX	633369	633770	3.35778	-45		chrXII	260202	261248	2.92619	-178		chrX	226640	227852	2.90214	-81
chrVIII	557912	559408	5	646		chrXI	272939	273770	3.12814	-39		chrX	636483	638104	3.5271	264		chrXII	264905	265519	3.20059	-244		chrX	230894	231531	2.908	-88
chrIX	3609	4361	4.95852	2162		chrXI	274802	275446	3.37757	-159		chrX	638755	639118	3.32663	38		chrXII	266616	267383	3.05633	-82		chrX	241352	241930	2.94051	-441
chrIX	6204	6668	2.09648	-289		chrXI	282134	282494	3.09489	15		chrX	640046	642188	3.47615	292		chrXII	270438	271345	1.96768	-116		chrX	245359	246736	2.44821	-442
chrIX	10352	11834	2.42763	-399		chrXI	284767	285158	2.45108	-67		chrX	643820	644571	3.5345	-95		chrXII	273625	275162	3.19059	-479		chrX	247015	247636	2.93686	71
chrIX	15598	18698	2.94418	-1112		chrXI	286358	286890	3.18847	21		chrX	646249	647022	3.50864	-146		chrXII	278295	279193	2.87895	-118		chrX	256452	258213	2.65245	-90
chrIX	20567	21788	2.10958	-2625		chrXI	288607	289309	5	113		chrX	653808	654559	3.4802	54		chrXII	286297	287099	3.16371	-122		chrX	262132	262942	2.94576	15
chrIX	30500	31625	2.10254	1503		chrXI	290852	291550	4.07454	-252		chrX	655738	656175	3.39714	6		chrXII	291375	291989	3.18024	1470		chrX	264725	265353	2.95183	12
chrIX	32669	33439	3.84133	-488		chrXI	293933	294684	3.62643	-1		chrX	658430	659155	3.24139	-104		chrXII	293137	293767	3.21144	120		chrX	272099	273088	2.95073	-109
chrIX	34653	35410	2.60209	-346		chrXI	295796	296691	3.41814	-51		chrX	664304	665389	3.27246	172		chrXII	295850	296606	3.17873	-134		chrX	278067	279184	2.58751	-215
chrIX	37040	37912	3.51122	91		chrXI	298968	299879	3.13517	-158		chrX	666968	667975	3.40204	-172		chrXII	301578	303213	1.72175	153		chrX	284946	285665	2.9077	-35
chrIX	38902	39771	3.09059	-96		chrXI	306775	308111	3.60422	158		chrX	669262	669738	3.32337	-22		chrXII	315608	316415	3.06155	-95		chrX	289122	289856	2.81406	-263
chrIX	41282	42180	4.51326	-94		chrXI	313510	314722	3.33859	-696		chrX	672404	673182	3.48714	-198		chrXII	320037	320831	3.15159	-267		chrX	291496	292279	2.89647	-1114
chrIX	45884	46663	2.71504	73		chrXI	321404	321775	3.24398	-72		chrX	675601	676071	3.34925	16		chrXII	329561	329947	3.10564	-516		chrX	295016	296168	2.79278	347
chrIX	47280	48392	3.54405	146		chrXI	329192	329590	3.00093	52		chrX	676559	677274	3.48578	-54		chrXII	331764	332830	1.67523	-182		chrX	302414	303360	2.94321	-38
chrIX	54797	55486	2.38414	-56		chrXI	330014	330404	3.50857	43		chrX	678383	679035	3.45203	-3		chrXII	336991	337682	3.05772	-72		chrX	305531	306547	2.93359	-93
chrIX	56289	57063	2.40901	131		chrXI	333713	334165	4.15146	30		chrX	684210	684805	3.40693	-59		chrXII	339213	339918	3.1481	-93		chrX	310348	311167	2.76754	-121
chrIX	60556	61284	3.21522	-226		chrXI	335296	336270	2.67378	374		chrX	695484	696183	3.52344	-72		chrXII	343288	344141	3.02688	52		chrX	312275	313055	2.79323	41
chrIX	62500	63179	2.36668	-112		chrXI	345121	347096	2.87907	-489		chrX	700356	701149	3.51099	-129		chrXII	345649	346893	2.95974	-314		chrX	314627	317839	2.78718	242
chrIX	67945	68307	2.94865	-59		chrXI	348901	349667	4.05229	-148		chrX	703939	704296	3.32084	-78		chrXII	363518	364393	3.10299	-160		chrX	319538	320381	2.88122	-56
chrIX	73362	73983	3.10523	-220		chrXI	359734	360448	3.81709	-52		chrX	709872	711968	3.51406	-1213		chrXII	373199	373625	3.06171	1792		chrX	322761	323665	2.87774	-173
chrIX	75669	76532	2.23118	-328		chrXI	371534	372003	3.69846	-60		chrX	717060	718438	3.48944	169		chrXII	377746	378310	3.10521	43		chrX	324719	325644	2.89787	218
chrIX	77042	78248	2.91087	-362		chrXI	374124	375792	1.3618	453		chrX	721446	722061	3.43911	-1061		chrXII	380707	381138	3.20587	101		chrX	327188	328045	2.58187	256
chrIX	82809	83573	1.38308	-111		chrXI	379034	379592	3.409	2545		chrX	723863	725858	3.51427	-923		chrXII	384159	384895	2.86856	7		chrX	334102	334565	2.90699	69
chrIX	88205	89039	2.25965	94		chrXI	385582	385988	3.60748	27		chrX	728395	731081	3.45812	-142		chrXII	385142	385819	3.12602	-53		chrX	341825	342944	2.82066	-137
chrIX	89473	90039	2.31326	-41		chrXI	391944	394034	4.66268	151		chrX	733636	734694	3.48658	1725		chrXII	390824	392130	3.17378	-70		chrX	345565	346198	2.8495	-91
chrIX	92523	93720	2.45396	-334		chrXI	396780	397416	4.31126	150		chrX	735570	738525	3.47908	1004		chrXII	395262	396054	3.21576	-138		chrX	351901	352684	2.91034	-93
chrIX	96177	96854	2.83936	-141		chrXI	398216	398739	4.16489	272		chrXI	5349	6955	3.40844	45		chrXII	398103	398817	3.14174	-70		chrX	355781	358473	2.75694	1103
chrIX	97197	98019	2.86575	213		chrXI	401805	402859	3.72489	-236		chrXI	7280	8807	3.36873	1937		chrXII	399138	399963	3.07328	-106		chrX	359322	359863	2.9557	83
chrIX	99875	101427	2.64029	-150		chrXI	403580	404402	4.71545	-111		chrXI	23668	25510	3.48466	-626		chrXII	423021	423989	3.15781	31		chrX	365503	366159	2.84732	47
chrIX	101840	102879	4.722	-125		chrXI	406840	407316	1.53513	163		chrXI	30475	31111	3.33112	-106		chrXII	426909	427591	3.19852	-79		chrX	373546	374357	2.89724	-153
chrIX	113048	114015	3.51018	-274		chrXI	408341	408929	4.06622	91		chrXI	31446	31906	3.0962	17		chrXII	431295	432488	3.19392	124		chrX	374767	375557	2.88849	612
chrIX	117354	118247	4.35154	-157		chrXI	416626	417245	4.15429	-23		chrXI	33873	34572	3.4324	-116		chrXII	433348	434968	2.98127	288		chrX	375894	376278	2.94376	-312
chrIX	122231	122631	2.12547	-258		chrXI	417751	418570	4.37966	-138		chrXI	44709	45630	3.27329	1125		chrXII	436911	437295	2.98816	2462		chrX	376699	378997	2.86817	-977
chrIX	126042	126410	2.26311	22		chrXI	420291	421296	2.14041	422		chrXI	46849	47423	3.28008	-21		chrXII	505453	506442	3.03337	-186		chrX	383648	384314	2.87839	144
chrIX	131646	132577	1.77989	-132		chrXI	425739	426511	3.8599	-117		chrXI	47840	48430	3.4794	-59		chrXII	509725	511118	3.20505	-190		chrX	387156	388403	2.90452	123
chrIX	134598	135568	2.41056	666		chrXI	429191	429587	3.32267	87		chrXI	49557	50318	3.43632	-113		chrXII	517393	518226	3.02515	-130		chrX	390593	391028	2.91612	42
chrIX	139569	139921	1.87824	-7		chrXI	430349	431039	3.83553	-62		chrXI	53412	53959	3.50324	-18		chrXII	523056	523933	3.06655	-137		chrX	393809	394335	2.85905	105
chrIX	148541	149439	3.9188	-281		chrXI	434377	435500	3.91758	-62		chrXI	63270	63726	3.49684	-139		chrXII	524338	525153	3.19	-119		chrX	398004	398741	2.87903	25
chrIX	149707	150769	2.26397	-250		chrXI	437223	437933	4.20239	-86		chrXI	75316	75990	3.48698	-119		chrXII	528051	528765	3.20064	108		chrX	402204	403696	2.83078	53
chrIX	151158	151884	2.76897	-74		chrXI	442478	443476	4.5419	-255		chrXI	78387	78997	3.40821	-46		chrXII	534141	534621	3.20831	12		chrX	407301	407927	2.81247	56
chrIX	155620	156356	3.45076	-57		chrXI	450890	452446	4.65844	234		chrXI	80368	81385	3.31967	-158		chrXII	539350	539789	3.20207	19		chrX	410405	411193	2.92141	241
chrIX	159993	160981	2.22292	-322		chrXI	461052	461668	3.89113	-121		chrXI	88366	89224	3.44958	-9		chrXII	542901	544322	1.69017	-308		chrX	413120	414080	2.94684	-201
chrIX	169487	170207	2.58721	-206		chrXI	463396	465023	3.19692	-94		chrXI	90931	92245	3.33595	-52		chrXII	545433	546419	3.08651	-171		chrX	414330	417392	2.83963	-1091
chrIX	171283	172018	3.37624	-100		chrXI	465955	466810	3.0688	-312		chrXI	93045	93609	3.18191	-29		chrXII	548617	549273	3.0364	-67		chrX	419120	419901	2.93736	51
chrIX	173177	174090	2.60351	-42		chrXI	472726	473742	2.95205	115		chrXI	112261	112996	3.3717	-126		chrXII	551673	552611	2.98433	-128		chrX	421329	422240	2.93119	-122
chrIX	179902	180680	2.84088	-52		chrXI	475435	476713	2.54768	-174		chrXI	122011	122775	3.47948	-124		chrXII	559226	559874	3.07842	-1		chrX	431856	432927	2.92668	-192
chrIX	182778	183348	4.85744	64		chrXI	477538	479431	3.14018	147		chrXI	125302	126046	3.52843	-85		chrXII	561452	562293	3.00228	-135		chrX	434368	435341	2.8985	-204
chrIX	183670	184058	1.87562	-73		chrXI	482901	483864	3.90127	-36		chrXI	126836	127677	3.38433	-218		chrXII	564225	564994	3.19976	-79		chrX	436644	437038	2.85159	39
chrIX	187418	188158	1.64142	-156		chrXI	486943	488206	4.84379	-195		chrXI	130208	130890	3.38774	-85		chrXII	565843	566760	2.98183	-21		chrX	438372	439225	2.92674	-66
chrIX	188526	189315	3.51944	-137		chrXI	491102	491701	4.0988	38		chrXI	133198	134668	3.48968	201		chrXII	578742	579372	3.1903	-33		chrX	442224	442879	2.95137	1
chrIX	192861	193744	4.02974	-108		chrXI	493430	494190	4.09502	-447		chrXI	141105	141573	3.36415	-648		chrXII	581414	582098	2.91632	15		chrX	445438	446101	2.75914	-153
chrIX	195278	197553	2.09342	817		chrXI	499438	500526	3.5621	-149		chrXI	145414	146353	3.49599	190		chrXII	585538	586524	3.21367	-433		chrX	448691	449680	2.79572	-16
chrIX	199237	200441	1.76599	280		chrXI	506181	507223	3.83299	185		chrXI	148614	149278	3.42995	-108		chrXII	589188	589604	3.20873	42		chrX	450295	451276	2.94316	-234
chrIX	201880	202533	1.47982	-164		chrXI	507776	508259	4.02252	79		chrXI	152465	153582	3.40132	-245		chrXII	592098	592472	2.95774	-242		chrX	458003	458767	2.89993	-24
chrIX	203023	203686	2.39577	-96		chrXI	510358	511043	2.83912	-68		chrXI	154249	155720	3.4416	-6		chrXII	604598	605997	3.12575	-511		chrX	459205	460737	2.85825	-411
chrIX	204491	205286	1.42251	-236		chrXI	511380	511919	3.13918	147		chrXI	161059	161819	3.42004	-97		chrXII	609284	610264	3.05016	-9		chrX	461332	462051	2.88255	-137
chrIX	207044	207917	5	1846		chrXI	512737	513310	4.46307	135		chrXI	168521	168916	3.24766	110		chrXII	614337	614956	3.1116	-108		chrX	462574	463027	2.83432	80
chrIX	211664	212750	4.61034	-202		chrXI	521422	522129	2.9704	-64		chrXI	176020	177131	3.35923	-95		chrXII	617101	617801	3.09183	-82		chrX	466783	467522	2.66367	-120
chrIX	215800	216874	2.80381	-321		chrXI	523447	524069	2.12874	211		chrXI	188438	189214	3.50161	-186		chrXII	623431	624449	3.18173	-57		chrX	469346	470023	2.91606	-99
chrIX	220601	221233	2.04308	-217		chrXI	526277	527949	4.30311	118		chrXI	191227	191936	3.4877	-140		chrXII	626166	627363	3.20577	165		chrX	485996	486356	2.80301	20
chrIX	226038	226427	2.87765	-279		chrXI	530533	531169	3.34559	-95		chrXI	192792	193506	3.50473	-79		chrXII	633178	634330	3.13892	-400		chrX	490474	491759	2.89406	36
chrIX	229770	230405	2.1364	-94		chrXI	547657	548503	4.89344	-136		chrXI	194305	195440	3.40983	-7		chrXII	668698	669989	3.18983	318		chrX	496098	496980	2.9057	-88
chrIX	230805	231693	3.49273	-177		chrXI	549395	549859	4.21225	179		chrXI	200062	200633	2.89588	-181		chrXII	672542	673297	3.09536	-211		chrX	503026	504408	2.85266	-219
chrIX	235269	235975	3.00711	-148		chrXI	551553	551916	2.38449	78		chrXI	209992	210726	3.15728	-234		chrXII	679688	680451	3.12974	-130		chrX	507215	508122	2.95234	-77
chrIX	237445	238295	3.44073	-110		chrXI	552507	553046	2.49782	7		chrXI	212711	214233	3.41806	-474		chrXII	680755	681307	3.09606	-155		chrX	513226	514536	2.89503	-118
chrIX	239348	240992	2.66895	538		chrXI	554394	555158	2.42481	-211		chrXI	218661	219577	3.32259	-7		chrXII	686901	687411	3.21578	46		chrX	518867	519391	2.91118	56
chrIX	241545	242508	5	84		chrXI	559472	559930	4.14006	35		chrXI	222781	223440	3.37918	174		chrXII	690651	691744	3.16739	-169		chrX	521848	522319	2.92327	36
chrIX	243437	243874	2.43151	88		chrXI	561969	562794	4.25343	-85		chrXI	224263	225002	3.2903	-178		chrXII	694080	694637	3.10245	-19		chrX	528231	529005	2.8375	-79
chrIX	244235	244933	2.59078	-122		chrXI	565496	568282	4.28592	309		chrXI	234271	234763	3.25308	91		chrXII	696526	697233	2.97442	-50		chrX	529482	530202	2.75744	-19
chrIX	245236	245896	3.11919	-7		chrXI	565496	568282	4.28592	309		chrXI	236860	237637	3.4571	17		chrXII	699333	699827	3.20485	-85		chrX	531897	532360	2.82387	67
chrIX	246751	248807	3.46372	617		chrXI	573007	574071	2.91036	-35		chrXI	242417	242883	3.40071	-67		chrXII	704828	705455	3.07542	-44		chrX	533796	534432	2.94297	87
chrIX	250903	251489	2.23574	1205		chrXI	577871	578405	3.5407	-15		chrXI	261608	262376	3.49676	-285		chrXII	706926	707769	2.08319	-12		chrX	535461	536158	2.90092	-246
chrIX	258306	259000	2.46554	-260		chrXI	579067	579497	4.03731	73		chrXI	269236	269847	3.40312	-83		chrXII	710318	710694	3.16102	-370		chrX	537875	539127	2.9398	-271
chrIX	259749	261463	2.6893	448		chrXI	579920	580663	2.22218	80		chrXI	271497	272460	3.29731	101		chrXII	711873	712284	3.16031	-21		chrX	540013	541010	2.93495	1740
chrIX	273609	274325	3.17825	-121		chrXI	584567	585349	3.40399	6		chrXI	272925	273731	3.38065	-66		chrXII	714573	715420	3.15051	-92		chrX	542346	542871	2.89608	-107
chrIX	274650	275241	1.75593	-20		chrXI	589060	589883	4.50558	-167		chrXI	274776	275468	3.52494	-161		chrXII	717697	718238	3.16681	10		chrX	554428	556306	2.77059	172
chrIX	276038	276781	3.46273	-115		chrXI	590140	590842	3.43474	96		chrXI	282087	283035	3.45184	-232		chrXII	719219	720719	3.08576	401		chrX	558850	559693	2.91823	-114
chrIX	277447	278737	2.74498	-334		chrXI	592266	593157	4.61001	-113		chrXI	284640	285126	3.34612	-147		chrXII	747294	747725	3.0643	-399		chrX	567052	567963	2.88346	-64
chrIX	282658	283612	3.34283	-483		chrXI	596412	597235	3.82133	-2		chrXI	286330	286876	3.0205	0		chrXII	751532	752159	3.16926	-77		chrX	568909	569764	2.78476	62
chrIX	284893	285675	3.90336	-285		chrXI	598432	600170	4.73888	380		chrXI	288584	289335	1.66947	115		chrXII	756782	757852	3.18343	295		chrX	576319	576826	2.88605	28
chrIX	288747	289437	4.04871	-184		chrXI	603943	604611	3.03992	-45		chrXI	290376	291574	3.51335	-478		chrXII	763868	765162	3.15067	-293		chrX	582172	582788	2.85446	-225
chrIX	289856	290430	2.65395	-54		chrXI	605160	605854	3.7308	-89		chrXI	294092	294783	3.35663	-130		chrXII	766125	766920	3.10405	-19		chrX	583183	583994	2.84933	-52
chrIX	292378	292751	2.76119	-68		chrXI	608189	609448	3.03448	-127		chrXI	295893	296686	3.51676	-97		chrXII	771480	772313	3.19094	-43		chrX	584724	586323	2.93828	-87
chrIX	299768	300197	2.22752	26		chrXI	619475	619924	4.12212	-105		chrXI	302152	303551	3.3563	-2262		chrXII	777529	778317	3.00062	-59		chrX	587061	588079	2.94731	-148
chrIX	301084	302127	2.6197	-349		chrXI	634659	635982	4.36224	-142		chrXI	306781	308129	3.37998	170		chrXII	778704	779416	3.1509	-108		chrX	594339	594729	2.70678	-207
chrIX	303313	304691	4.01719	102		chrXI	640014	640830	4.44217	-118		chrXI	309769	310399	3.2206	-115		chrXII	787100	787828	3.17852	-200		chrX	603845	604910	2.95178	-175
chrIX	307622	308288	2.98785	-26		chrXI	642889	643497	2.56391	2653		chrXI	313216	314777	3.50098	-815		chrXII	801990	802566	3.18576	118		chrX	605183	605890	2.76493	114
chrIX	310126	311348	2.77954	-311		chrXI	649645	650815	3.89704	-2850		chrXI	321436	321774	3.2771	-87		chrXII	808515	809046	3.18904	-1216		chrX	608795	611349	2.89627	299
chrIX	312642	313198	3.3495	15		chrXI	658063	659013	3.29164	1702		chrXI	329251	330395	3.42558	-343		chrXII	818200	818586	3.20945	-919		chrX	611857	612679	2.89781	-145
chrIX	314482	315658	4.3014	-23		chrXII	3260	4243	3.46781	549		chrXI	333683	334230	3.50728	12		chrXII	830153	831233	3.13461	-329		chrX	615003	616113	2.89184	-18
chrIX	320769	321769	4.33139	-185		chrXII	8596	9772	3.29966	652		chrXI	346441	347157	3.49745	-35		chrXII	841076	841637	3.10896	26		chrX	616967	618420	2.16968	-360
chrIX	331687	332675	2.93751	261		chrXII	15616	16856	4.11278	-164		chrXI	348937	349695	3.53669	-147		chrXII	843882	844467	3.21226	-107		chrX	624659	625064	2.78686	24
chrIX	333113	335216	3.53476	438		chrXII	25760	27141	1.46188	543		chrXI	352479	354326	3.52412	-90		chrXII	848868	850027	2.93349	231		chrX	628439	629205	2.86496	110
chrIX	335885	336343	2.48319	98		chrXII	34835	35341	2.36633	116		chrXI	357952	358667	3.36337	-165		chrXII	862057	862738	3.2049	-144		chrX	633400	633861	2.87529	16
chrIX	336998	338407	1.58728	-1491		chrXII	39215	39628	2.65694	49		chrXI	359662	360375	3.48116	-124		chrXII	871007	871763	3.06292	-18		chrX	636472	638114	2.88796	263
chrIX	341758	342803	2.99828	-255		chrXII	40184	41060	4.30543	-44		chrXI	361645	362505	2.82212	-247		chrXII	873519	874151	3.06475	-281		chrX	638704	639114	2.81917	66
chrIX	343403	344355	3.33901	-183		chrXII	46240	47097	2.84687	-3		chrXI	371530	372010	3.49239	-59		chrXII	877258	878393	3.05664	-456		chrX	640043	642205	2.91659	299
chrIX	345250	345893	1.93485	-120		chrXII	48997	50149	3.69441	-365		chrXI	374069	374674	3.43077	-133		chrXII	879408	880068	3.16434	15		chrX	643773	644587	2.74449	-79
chrIX	348213	349355	2.71298	-279		chrXII	52160	52772	4.10353	124		chrXI	375074	375749	3.48674	-44		chrXII	884431	885461	2.84972	-195		chrX	646202	647067	2.94386	-145
chrIX	349860	350550	3.38786	-96		chrXII	65789	67011	3.89451	118		chrXI	378982	379621	3.5327	2556		chrXII	892518	893950	2.93217	156		chrX	653448	654445	2.85833	291
chrIX	353338	354010	2.19844	-243		chrXII	67973	68778	4.50075	-120		chrXI	385523	386011	3.45099	9		chrXII	906281	907339	3.04274	-269		chrX	655629	656191	2.85976	53
chrIX	356744	357302	1.40358	-128		chrXII	72884	73901	4.92901	-16		chrXI	391974	392747	3.34348	-82		chrXII	912159	912672	2.74863	-106		chrX	658412	659084	2.86196	-59
chrIX	360256	361130	2.15815	-192		chrXII	76478	77048	2.98468	-16		chrXI	393039	394008	3.43229	-151		chrXII	918750	919199	3.11797	44		chrX	666961	668095	2.95324	-116
chrIX	362836	363489	2.62751	-58		chrXII	109104	109668	2.60477	-414		chrXI	396839	397406	3.45867	125		chrXII	924226	924574	3.11029	48		chrX	672456	673165	2.86729	-180
chrIX	364584	365130	2.05762	-32		chrXII	111234	112476	3.45712	-280		chrXI	398279	398820	3.49142	200		chrXII	929518	930111	3.20217	26		chrX	675530	676070	2.84975	52
chrIX	369665	370185	2.64818	-17		chrXII	115919	116567	1.34952	-189		chrXI	401836	402802	3.49584	-239		chrXII	933497	934768	3.04106	120		chrX	676542	677329	2.91446	-35
chrIX	374000	375723	2.68581	337		chrXII	121067	121686	4.30427	55		chrXI	403577	404399	3.40168	-109		chrXII	936935	937749	3.00794	-109		chrX	678227	678894	2.9453	145
chrIX	378021	378823	4.64563	-64		chrXII	126881	127919	5	-123		chrXI	408337	408764	3.41305	7		chrXII	947207	948633	3.11522	-448		chrX	684248	685000	2.90517	57
chrIX	379595	380496	2.06383	338		chrXII	130538	130966	4.14386	-139		chrXI	416585	417281	3.39062	-20		chrXII	957897	958686	3.19404	-136		chrX	695368	696277	2.85495	-83
chrIX	380705	381315	3.35712	-76		chrXII	131242	132293	4.84075	39		chrXI	417784	418515	3.44939	-127		chrXII	963426	963938	3.07197	-103		chrX	696787	697533	2.74763	19
chrIX	384515	384871	2.08628	84		chrXII	135989	136797	4.28936	48		chrXI	425739	426564	3.50091	-90		chrXII	965433	966090	3.20297	-135		chrX	700294	701218	2.92304	-126
chrIX	386210	386672	1.93724	-740		chrXII	140948	141589	4.23406	196		chrXI	430351	431099	3.53254	-93		chrXII	981801	982916	3.14318	-535		chrX	710017	711889	2.94021	-1246
chrIX	386997	387548	1.42883	-1572		chrXII	142782	143499	3.87007	-60		chrXI	434509	435561	3.38577	-158		chrXII	986837	988541	3.06018	627		chrX	716911	718495	2.92345	123
chrIX	396707	397691	3.98504	-95		chrXII	147150	148023	2.72742	-303		chrXI	437253	437950	3.53626	-110		chrXII	990539	991078	3.01707	32		chrX	721523	722007	2.88248	-1050
chrIX	398113	399022	4.26139	54		chrXII	156029	156649	2.63055	-5		chrXI	442470	443345	3.42944	-186		chrXII	992867	993472	2.92948	-264		chrX	723297	724595	2.6877	1131
chrIX	399274	400048	4.06236	-116		chrXII	157515	158573	3.51432	-314		chrXI	450950	452447	3.22782	265		chrXII	1005912	1006637	3.2036	-103		chrX	724877	725868	2.89549	-411
chrIX	403200	403864	2.5312	-41		chrXII	159321	160328	3.17808	-224		chrXI	461039	461632	3.51793	-97		chrXII	1013910	1014761	2.9703	-155		chrX	728483	731107	2.80947	-199
chrIX	405589	407334	4.84931	-495		chrXII	163856	164836	3.50203	-46		chrXI	462538	464232	3.28192	-574		chrXII	1022070	1022766	3.13528	-167		chrX	733366	734663	2.94422	1575
chrIX	409441	411142	2.55632	-515		chrXII	165859	166603	3.24039	-148		chrXI	465958	466677	3.43602	-247		chrXII	1027619	1028119	3.12556	24		chrXI	5142	6966	2.9083	-53
chrIX	415320	416281	2.95917	-184		chrXII	167472	169361	3.66456	-615		chrXI	473110	473755	3.01053	-84		chrXII	1030353	1031094	3.17866	-110		chrXI	7798	8614	2.87283	2099
chrIX	422577	423312	3.15644	-80		chrXII	167472	169361	3.66456	-615		chrXI	477621	479388	3.32644	167		chrXII	1032275	1032857	2.93436	-61		chrXI	18404	19283	2.84545	-505
chrIX	424368	426962	4.80171	-1152		chrXII	174277	175607	3.10386	40		chrXI	482920	483648	3.50843	-135		chrXII	1035635	1036331	3.05176	-110		chrXI	22325	22768	2.83347	313
chrIX	429038	430328	3.55781	2428		chrXII	177051	178053	4.1768	-56		chrXI	486988	488219	2.17002	-166		chrXII	1052897	1053631	3.11865	-365		chrXI	23592	25533	2.94287	-652
chrIX	431912	432829	3.29969	-260		chrXII	179244	180286	3.85231	-159		chrXI	489404	490731	3.47025	-413		chrXII	1054905	1055393	3.17357	79		chrXI	30372	31145	2.93033	-72
chrIX	435840	437415	2.75625	-645		chrXII	183134	184076	3.68877	-18		chrXI	491107	491618	3.50231	-1		chrXII	1056393	1057576	3.19863	-214		chrXI	31414	31987	2.92049	-8
chrIX	437763	438480	3.50708	-2139		chrXII	192835	194703	4.23306	-488		chrXI	493408	494166	3.52293	-470		chrXII	1059082	1059480	3.12547	1606		chrXI	33828	34605	2.88497	-110
chrX	3394	4341	5	2262		chrXII	196247	196699	3.51268	-1		chrXI	499516	500538	3.42903	-194		chrXII	1067793	1068406	3.03445	-747		chrXI	37930	39421	2.86427	-487
chrX	10352	11795	2.93602	-401		chrXII	202836	203927	3.62475	92		chrXI	506259	507225	3.48952	-156		chrXII	1074431	1075070	2.28599	2243		chrXI	44566	45579	2.74332	1222
chrX	27936	29868	3.52352	2015		chrXII	204594	205305	2.63683	-41		chrXI	507768	508247	3.46806	69		chrXIII	3155	3953	3.04257	1130		chrXI	47920	48477	2.91968	5
chrX	30710	33618	2.03148	1		chrXII	208217	208986	3.55814	-159		chrXI	510364	511085	3.39677	-92		chrXIII	14464	15141	3.09513	-50		chrXI	49464	50367	2.92356	-107
chrX	37372	38224	3.11997	-207		chrXII	213999	214833	3.96488	40		chrXI	511477	512076	3.39875	20		chrXIII	16630	17262	3.14943	-118		chrXI	53428	54073	2.88744	47
chrX	40852	41667	3.27685	-77		chrXII	228194	228921	3.37583	38		chrXI	512830	513337	3.47788	75		chrXIII	23326	24248	2.1148	-104		chrXI	62960	63722	2.91939	18
chrX	47162	47860	2.34679	-78		chrXII	241421	241787	3.37323	-197		chrXI	521449	522234	3.35988	-130		chrXIII	26752	27179	3.11382	36		chrXI	73636	74525	2.77137	-216
chrX	49617	50712	2.31409	-230		chrXII	248099	250055	3.08348	-651		chrXI	523090	524168	3.38118	340		chrXIII	41601	42272	3.17901	-143		chrXI	75258	76006	2.79368	-98
chrX	52894	53592	3.10215	-92		chrXII	252743	253188	2.62738	114		chrXI	526329	527960	3.52684	86		chrXIII	51406	51897	3.10192	12		chrXI	78322	78765	2.87349	102
chrX	54208	54687	3.643	69		chrXII	255016	255586	3.25206	-5		chrXI	530470	531121	3.39049	-150		chrXIII	54202	54989	3.19847	-197		chrXI	80336	81921	2.73744	94
chrX	57992	59552	2.41368	41		chrXII	259845	261244	4.29964	2		chrXI	547704	548469	3.37851	-129		chrXIII	55892	56709	3.15511	-32		chrXI	84422	84908	2.8116	-39
chrX	59813	61124	3.59946	-287		chrXII	266627	267440	4.49592	-116		chrXI	549246	549929	3.34029	140		chrXIII	58389	59204	3.11952	-110		chrXI	88275	89331	2.86465	-17
chrX	63189	64016	3.723	-202		chrXII	270393	271359	4.91432	-132		chrXI	551440	551936	3.50985	31		chrXIII	61981	62682	3.1591	-10		chrXI	93080	93688	2.92599	-86
chrX	68546	68933	2.08831	42		chrXII	273615	275482	3.55893	-634		chrXI	554476	555171	3.37096	-163		chrXIII	67278	68595	3.13081	-357		chrXI	112178	112896	2.80705	-34
chrX	70950	71699	3.81104	-41		chrXII	278307	279243	4.88025	-87		chrXI	559434	559886	3.40264	-6		chrXIII	79456	80201	3.14455	-80		chrXI	122017	122822	2.92801	-97
chrX	72653	73508	2.28907	333		chrXII	281201	282503	3.02258	-231		chrXI	561988	562722	3.48983	-58		chrXIII	81862	83431	3.15752	-27		chrXI	125277	126108	2.8295	-66
chrX	75080	75451	1.80015	36		chrXII	283773	284267	2.78376	148		chrXI	565572	566492	3.39949	-140		chrXIII	99023	100066	2.9153	56		chrXI	126788	127730	2.90687	-216
chrX	82193	84302	3.55889	-200		chrXII	286077	287109	2.7201	-34		chrXI	566954	568091	3.5147	-325		chrXIII	101601	102293	2.19083	85		chrXI	130252	130960	2.94571	-28
chrX	85473	85961	3.65495	35		chrXII	287788	288391	2.97599	174		chrXI	570624	571842	3.388	-324		chrXIII	103560	104990	3.07988	-113		chrXI	133102	134579	2.95275	293
chrX	88271	89031	3.15077	-91		chrXII	291040	292027	4.56058	1322		chrXI	577963	579478	3.38473	-214		chrXIII	108353	109131	2.96606	-64		chrXI	145729	146382	2.94763	18
chrX	89845	90185	1.73129	82		chrXII	293103	293771	3.25565	135		chrXI	584540	585207	3.51697	-78		chrXIII	111737	112191	3.16243	99		chrXI	148502	149232	2.86397	-29
chrX	94219	95255	4.52618	-207		chrXII	295900	296789	2.95438	-251		chrXI	589160	590800	3.38826	-415		chrXIII	121077	121723	3.21558	-76		chrXI	152467	153665	2.80821	-203
chrX	96258	97858	3.05146	-529		chrXII	301555	303201	4.99991	135		chrXI	592228	593095	3.39912	-122		chrXIII	129448	130013	3.15362	-364		chrXI	154247	155715	2.79397	-10
chrX	113008	113664	2.98408	-3		chrXII	315575	316456	4.77164	-91		chrXI	596499	597212	3.48028	-34		chrXIII	132914	133587	3.15174	-224		chrXI	161006	161874	2.89581	-98
chrX	115132	115822	2.57008	152		chrXII	319774	320977	4.34386	-325		chrXI	598619	600158	3.40646	292		chrXIII	135259	135752	3.15788	6		chrXI	171643	171928	2.76197	3
chrX	128702	129341	2.44465	-70		chrXII	331807	332812	4.92151	-195		chrXI	603966	604582	3.40575	-42		chrXIII	137348	137696	3.17329	-28		chrXI	175958	177412	2.86219	-96
chrX	137001	137564	2.10456	-96		chrXII	336991	337688	4.16194	-75		chrXI	605186	605835	3.43741	-93		chrXIII	139902	140708	3.16307	-91		chrXI	177880	178332	2.79263	-409
chrX	140084	140712	2.51388	-39		chrXII	339140	340071	3.35591	-133		chrXI	608189	609377	3.48339	-163		chrXIII	141715	142494	3.11442	-105		chrXI	180326	180889	2.82721	-171
chrX	142304	143417	3.1661	-294		chrXII	343096	344143	3.34036	147		chrXI	613761	614877	3.36477	-434		chrXIII	145642	146036	3.16158	37		chrXI	184751	186196	1.91486	207
chrX	146769	147399	4.01895	-17		chrXII	363541	364363	3.32179	-164		chrXI	615156	616590	3.32279	143		chrXIII	148469	149175	3.17202	-139		chrXI	188258	189437	2.83866	-208
chrX	150435	151124	2.33956	-181		chrXII	376968	377425	3.42896	41		chrXI	619294	619917	3.51512	-199		chrXIII	164039	165177	3.17146	-182		chrXI	191067	191920	2.93404	-52
chrX	154684	155256	2.75978	-279		chrXII	377747	378349	3.81539	63		chrXI	630640	631069	3.4652	-297		chrXIII	169566	169939	3.19398	1		chrXI	192629	193501	2.88143	5
chrX	155923	156492	2.45935	39		chrXII	380765	381092	2.76001	107		chrXI	631456	632540	3.52381	846		chrXIII	172976	173737	3.17713	218		chrXI	194249	195476	2.88178	3
chrX	157787	158435	2.21643	-77		chrXII	384107	384880	4.86466	40		chrXI	634934	635879	3.25402	-228		chrXIII	177807	178589	3.17914	107		chrXI	195862	196442	2.84209	-124
chrX	165100	165552	2.58363	22		chrXII	385140	385958	3.80599	15		chrXI	640042	640819	3.51121	-109		chrXIII	181191	181734	3.04207	-11		chrXI	200061	200631	2.816	-179
chrX	177379	177823	1.60596	-295		chrXII	390892	392161	3.90985	-73		chrXI	642835	643307	2.97543	2531		chrXIII	191390	192116	2.96576	14		chrXI	204833	205752	2.8383	-414
chrX	184003	184795	2.63458	-102		chrXII	395190	396066	3.45216	-108		chrXI	649584	650759	3.29104	-2908		chrXIII	195509	195975	3.20633	13		chrXI	212652	213337	2.7846	3
chrX	186397	187061	2.99902	-50		chrXII	398024	399944	4.03454	454		chrXI	657959	659019	3.47876	1653		chrXIII	203905	204681	2.99135	-190		chrXI	213691	214345	2.90177	-124
chrX	187508	188076	3.38012	-148		chrXII	412835	413909	2.66308	91		chrXII	3326	4266	3.47649	505		chrXIII	205148	205926	3.14966	-105		chrXI	217132	217540	2.8721	-8
chrX	189190	190162	3.57966	-40		chrXII	415249	417509	2.23313	279		chrXII	4991	5284	3.17555	-467		chrXIII	213826	214519	2.42368	-16		chrXI	218670	219628	2.86157	23
chrX	190737	192750	3.27057	105		chrXII	417747	418666	2.57977	-230		chrXII	8847	9847	3.45627	489		chrXIII	215948	216723	3.16876	-99		chrXI	220153	220558	2.898	32
chrX	197431	198308	1.53286	-45		chrXII	422941	423997	3.9333	4		chrXII	10513	10832	3.20188	-837		chrXIII	217102	217597	3.18728	-12		chrXI	222757	223492	2.93241	160
chrX	204949	205441	1.73856	-110		chrXII	426829	427681	3.67905	-74		chrXII	13623	14301	3.53692	-517		chrXIII	224987	225575	3.13989	84		chrXI	234255	234755	2.87465	79
chrX	207337	208141	2.16205	-138		chrXII	433266	435069	3.63403	295		chrXII	15720	16843	3.39193	-210		chrXIII	228508	229123	3.03247	-121		chrXI	236860	237602	2.88115	35
chrX	211503	212198	1.90538	-274		chrXII	441658	443191	2.1433	312		chrXII	40195	41055	3.51519	-41		chrXIII	230450	231346	3.13973	-85		chrXI	242349	242873	2.88612	-28
chrX	217024	217827	3.64655	-117		chrXII	453930	455032	5	89		chrXII	46248	47081	3.47964	-7		chrXIII	233084	233784	3.14511	-23		chrXI	255280	256993	2.81479	335
chrX	219587	220257	1.95279	94		chrXII	463151	464173	5	-991		chrXII	48437	50135	3.44525	-652		chrXIII	236381	236835	3.1666	20		chrXI	261570	262415	2.76403	-284
chrX	220547	221165	2.27869	-534		chrXII	497768	498462	1.90287	-71		chrXII	52141	52755	3.36523	142		chrXIII	241638	242287	3.11719	-427		chrXI	269157	269825	2.86977	-32
chrX	223236	224127	3.9251	-1373		chrXII	501921	502564	1.37434	-81		chrXII	63511	63877	3.11292	-49		chrXIII	242717	244456	1.64687	362		chrXI	271483	272523	2.79714	125
chrX	226813	227855	2.94196	7		chrXII	503867	505114	1.51264	-100		chrXII	65756	67010	3.51887	135		chrXIII	247237	247962	3.02157	-77		chrXI	272932	273749	2.92153	-53
chrX	245279	245843	3.11221	-30		chrXII	505433	506337	3.11496	-249		chrXII	67985	68827	3.12456	-150		chrXIII	251197	251995	3.06353	-80		chrXI	274785	275481	2.7799	-150
chrX	246112	246718	2.66114	-75		chrXII	509654	511203	3.08869	-197		chrXII	72840	73732	3.04849	-123		chrXIII	266714	267272	2.95672	-181		chrXI	281901	283089	2.90309	-166
chrX	247030	247534	2.54758	27		chrXII	517372	518230	4.59845	-131		chrXII	76494	77075	3.4759	-38		chrXIII	272947	273274	3.12491	-7		chrXI	284553	285207	2.85051	-150
chrX	254251	254618	1.74871	7		chrXII	523092	523881	4.07823	-145		chrXII	79978	80619	3.34083	-94		chrXIII	275710	276268	3.16109	-56		chrXI	286314	286971	2.95411	40
chrX	256497	257704	5	-289		chrXII	524315	525205	3.96672	-105		chrXII	91571	93599	3.20467	-2162		chrXIII	284344	285050	3.139	-403		chrXI	288522	289519	2.76174	176
chrX	260604	261267	2.12745	1616		chrXII	528083	529204	2.84428	344		chrXII	109075	109725	3.29517	-428		chrXIII	296555	296928	3.21389	-4		chrXI	289868	291587	2.8543	-725
chrX	262226	262892	1.75448	-7		chrXII	534110	534553	3.75952	61		chrXII	111269	112414	3.42123	-267		chrXIII	298632	299085	3.13001	-9		chrXI	294053	294720	2.80071	-79
chrX	264843	265455	2.73795	-98		chrXII	536878	537524	3.09284	-71		chrXII	114080	114845	3.45682	-1969		chrXIII	308279	308950	3.03319	1126		chrXI	295798	296664	2.88304	-38
chrX	272277	273005	3.46472	-156		chrXII	540354	542157	2.83007	317		chrXII	120990	121622	3.39726	-16		chrXIII	311736	312564	2.98843	-6		chrXI	299024	299788	2.81443	-176
chrX	277993	279086	2.87986	-301		chrXII	542843	544269	4.68155	-252		chrXII	126889	127931	1.80632	-113		chrXIII	318139	319024	3.04804	-98		chrXI	306775	308128	2.9416	167
chrX	284979	285708	3.41114	-73		chrXII	545470	546348	2.89921	-188		chrXII	136056	136769	3.27493	68		chrXIII	321515	322240	3.0449	3		chrXI	313460	314737	2.91285	-713
chrX	289165	289952	2.25792	-333		chrXII	548418	549319	2.70216	-100		chrXII	140869	141406	3.48889	65		chrXIII	323079	323572	3.1735	26		chrXI	321461	321765	2.82032	-95
chrX	291494	292258	3.06259	-1102		chrXII	551668	552646	4.85278	-113		chrXII	142749	143467	3.4507	-93		chrXIII	337386	338062	3.16385	-64		chrXI	329182	329674	2.93878	15
chrX	295020	295543	4.46401	37		chrXII	553567	554630	2.10371	-422		chrXII	146084	146587	3.43421	45		chrXIII	340595	341425	3.21331	-132		chrXI	329969	330398	2.95196	18
chrX	302442	303392	3.39946	-68		chrXII	556622	557106	3.09988	76		chrXII	153781	154469	3.28957	-148		chrXIII	343271	344047	3.0063	-139		chrXI	333529	334230	2.86204	89
chrX	305583	306400	2.78377	-130		chrXII	559225	559891	4.56232	7		chrXII	156040	156784	3.32006	-78		chrXIII	366391	367675	3.03658	52		chrXI	335943	336275	2.74736	48
chrX	310419	311166	2.39189	-156		chrXII	560880	562353	4.35856	115		chrXII	157490	158536	3.22707	-283		chrXIII	370187	370866	3.04473	-10		chrXI	346424	347147	2.93076	-22
chrX	312328	313158	4.68514	-37		chrXII	564144	565122	3.97507	-102		chrXII	159412	160307	3.42872	-189		chrXIII	386569	387179	3.15082	147		chrXI	348826	349680	2.89308	-117
chrX	314662	317729	4.01545	279		chrXII	565730	566905	4.43201	-37		chrXII	163858	164784	3.46093	-71		chrXIII	390446	391427	3.12294	-162		chrXI	352452	354368	2.95288	-83
chrX	319532	320305	3.20605	-97		chrXII	571517	572063	3.32531	68		chrXII	165877	166711	3.42112	-211		chrXIII	392250	393071	2.90485	-94		chrXI	358084	358748	2.91512	-59
chrX	322544	323574	3.707	-327		chrXII	578778	579255	2.4898	7		chrXII	167479	169358	3.23549	-617		chrXIII	401159	401808	3.07255	-57		chrXI	359696	360429	2.93314	-80
chrX	324614	325456	2.79517	71		chrXII	581385	582114	4.39113	21		chrXII	171179	171974	3.45298	238		chrXIII	411073	411825	3.11962	-120		chrXI	361600	362602	2.8096	-273
chrX	327244	328201	2.42143	150		chrXII	589237	589562	1.94281	46		chrXII	174615	175600	3.42336	-119		chrXIII	412566	414131	3.14149	124		chrXI	371542	372023	2.94437	-46
chrX	334006	334516	2.10052	-4		chrXII	604565	605160	4.33654	-76		chrXII	177040	178081	3.43751	-47		chrXIII	419872	420251	3.19185	-33		chrXI	374149	374680	2.94391	-90
chrX	341876	342938	3.23056	-115		chrXII	605514	605955	3.04642	-948		chrXII	179254	180235	3.49753	-139		chrXIII	421975	422686	3.21313	-182		chrXI	375120	376167	2.88777	188
chrX	345494	346163	2.41756	-144		chrXII	609285	610416	4.45104	68		chrXII	183149	183976	3.51314	-60		chrXIII	424453	425260	3.10866	-129		chrXI	379059	379592	2.87925	2532
chrX	351938	352642	2.80962	-96		chrXII	614353	615090	3.41315	-33		chrXII	193002	194669	3.4725	-555		chrXIII	429389	430380	3.20715	-258		chrXI	385546	386040	2.92718	35
chrX	359386	359875	3.32283	45		chrXII	617043	617854	3.77127	-84		chrXII	196285	196993	3.47804	-167		chrXIII	451078	451580	3.13908	36		chrXI	389880	390407	2.81848	-261
chrX	360120	361428	2.18887	-475		chrXII	623257	624457	4.09596	26		chrXII	202564	203652	3.44061	-182		chrXIII	453366	454422	2.54498	-121		chrXI	391877	394066	2.72151	168
chrX	365301	366046	3.26701	-110		chrXII	626116	627384	2.91405	180		chrXII	204503	205246	3.32682	-116		chrXIII	455648	456198	3.11402	98		chrXI	396727	397391	2.8366	189
chrX	373675	374391	3.0433	-234		chrXII	657089	658167	2.24865	-1198		chrXII	208176	209025	3.53111	-160		chrXIII	460365	460935	3.09731	-123		chrXI	398158	398767	2.94083	287
chrX	374694	378909	3.83444	140		chrXII	668656	670011	3.39397	328		chrXII	214059	214844	3.26796	4		chrXIII	462401	463010	3.10341	-97		chrXI	401814	402854	2.87724	-234
chrX	380349	381137	2.29922	258		chrXII	672569	673267	3.80512	-213		chrXII	221925	222605	3.4423	-133		chrXIII	464613	465188	3.10595	-74		chrXI	403562	404628	2.80756	-7
chrX	383664	384250	3.81923	120		chrXII	675237	675905	3.42148	-116		chrXII	228237	228990	3.36615	-18		chrXIII	486432	486782	3.1871	20		chrXI	408351	408853	2.92806	58
chrX	387182	388461	2.03782	165		chrXII	679688	681264	4.35242	276		chrXII	231810	232144	3.3124	36		chrXIII	493455	495195	3.06743	170		chrXI	416521	417278	2.7195	13
chrX	390648	391004	2.55705	27		chrXII	682436	683128	1.97877	45		chrXII	237467	238029	3.50529	-45		chrXIII	497174	497846	3.17301	-61		chrXI	417712	418595	2.66278	-131
chrX	393728	394259	4.23592	27		chrXII	686669	687440	3.87772	147		chrXII	241428	241829	3.44662	-222		chrXIII	501634	502479	3.13116	-166		chrXI	425690	426541	2.79456	-126
chrX	396425	397283	1.43042	-262		chrXII	690838	691728	2.85977	-254		chrXII	245002	247455	3.23079	-157		chrXIII	510112	510521	3.18583	31		chrXI	429162	429572	2.73904	65
chrX	398052	398787	2.72612	-22		chrXII	694005	694669	3.77545	-41		chrXII	248271	249990	3.43118	-705		chrXIII	512616	513847	3.163	-361		chrXI	430325	431049	2.87493	-55
chrX	402240	403713	3.83582	80		chrXII	696616	697259	4.05417	-108		chrXII	252820	253258	3.43771	41		chrXIII	517243	517827	2.9753	-4		chrXI	434675	435588	2.93975	-255
chrX	407173	407834	2.8953	-54		chrXII	699238	699784	3.50775	-16		chrXII	254838	255578	3.40156	-98		chrXIII	521767	522462	3.01974	-326		chrXI	437191	437958	2.94514	-83
chrX	410693	411174	3.0137	106		chrXII	704793	705483	2.09414	-48		chrXII	260202	261255	3.35365	-182		chrXIII	523149	523972	3.17413	-135		chrXI	442451	443994	2.7479	-9
chrX	413228	414042	2.2013	-236		chrXII	706816	707730	4.93689	-87		chrXII	264120	265537	3.38158	-627		chrXIII	527177	528140	1.85571	-145		chrXI	450900	452518	2.85026	275
chrX	414441	417643	4.7474	-1272		chrXII	711863	712256	2.97154	-2		chrXII	266610	267385	3.23935	-80		chrXIII	534435	535024	3.19196	-32		chrXI	460985	461589	2.87688	-48
chrX	419277	419885	2.57294	-19		chrXII	714607	715531	3.79993	-20		chrXII	270476	271333	2.77123	-103		chrXIII	539828	540171	3.12876	56		chrXI	462538	462912	2.86736	-29
chrX	421450	422181	2.80164	-153		chrXII	717701	718248	2.82878	3		chrXII	273636	275498	3.49389	644		chrXIII	544692	546182	3.15422	282		chrXI	463344	464070	2.77273	-252
chrX	424641	425182	1.86774	-245		chrXII	719216	720667	4.1524	428		chrXII	278316	279169	3.29469	-117		chrXIII	547517	547890	3.15657	-10		chrXI	465955	466712	2.94483	-263
chrX	431883	432951	2.77533	-217		chrXII	743644	744491	3.03666	-83		chrXII	281169	282581	3.41496	-254		chrXIII	564039	564776	3.07036	-27		chrXI	475552	476587	2.88678	-170
chrX	434415	435278	2.28735	-196		chrXII	745401	747713	4.08468	554		chrXII	283738	284163	3.27656	79		chrXIII	571752	572501	3.15097	-83		chrXI	477619	479377	2.84765	160
chrX	436678	437001	1.52807	38		chrXII	751503	752201	4.05509	-83		chrXII	286311	287088	3.4491	-120		chrXIII	574622	575327	3.00465	-47		chrXI	482838	483769	2.87087	-115
chrX	438363	439179	2.61547	-94		chrXII	756792	757633	3.63572	-220		chrXII	287795	288261	3.28736	112		chrXIII	577304	577970	3.19669	-81		chrXI	486553	488562	2.74029	-186
chrX	442241	443170	3.3724	-153		chrXII	759330	759865	4.54866	118		chrXII	291105	292129	2.75745	1405		chrXIII	583759	584600	3.10772	-259		chrXI	489175	491857	2.73198	-848
chrX	445375	446077	3.22454	-197		chrXII	763832	764346	4.40158	48		chrXII	293255	293818	3.47034	35		chrXIII	586265	586649	3.12416	-69		chrXI	489175	491857	2.73198	-848
chrX	448357	449522	2.9622	-182		chrXII	764589	765260	4.04573	117		chrXII	295857	296759	3.20742	-214		chrXIII	592490	593230	3.05256	-232		chrXI	493352	494258	2.95253	-452
chrX	450331	451212	3.14997	-248		chrXII	766108	767128	2.96356	76		chrXII	301658	303200	3.12233	186		chrXIII	594355	595086	2.9903	-165		chrXI	499425	500582	2.94862	-171
chrX	455298	455888	2.25443	-646		chrXII	771432	772296	3.72657	-76		chrXII	315593	316404	3.32298	-108		chrXIII	598938	599597	3.03587	-110		chrXI	506208	507193	2.91665	184
chrX	457707	458763	2.03042	126		chrXII	786978	787829	3.08036	-260		chrXII	319987	320897	3.21052	-259		chrXIII	605906	606444	3.10876	194		chrXI	507749	508302	2.9522	87
chrX	459191	460670	2.68302	-451		chrXII	792232	793783	3.16458	-1962		chrXII	329619	329900	3.15847	-522		chrXIII	618128	618748	3.01769	-41		chrXI	510292	511076	2.78245	-51
chrX	461300	462023	2.35716	-167		chrXII	801965	802549	3.90813	139		chrXII	331826	332741	3.27575	-169		chrXIII	627531	628482	3.08676	-182		chrXI	511430	512108	2.75188	28
chrX	462614	462989	2.06073	81		chrXII	804933	805448	1.37119	-85		chrXII	337012	337710	3.47707	-96		chrXIII	628804	629424	3.10277	89		chrXI	512711	513349	2.90085	129
chrX	466848	467531	2.25181	-157		chrXII	808323	808995	4.19073	1274		chrXII	339175	339990	3.0253	-110		chrXIII	636748	637232	3.13712	14		chrXI	521438	522172	2.82781	-93
chrX	469350	469995	3.17094	-94		chrXII	818160	818581	3.76958	-941		chrXII	343340	344305	3.39689	-56		chrXIII	644970	645844	2.97089	-149		chrXI	522979	524053	2.83812	453
chrX	470759	471273	1.83509	-52		chrXII	829749	831292	3.13316	-157		chrXII	363523	364373	3.48291	-168		chrXIII	658958	659748	3.15318	-155		chrXI	526286	527945	2.90593	115
chrX	485999	486376	2.63387	8		chrXII	841136	841613	3.78045	44		chrXII	377040	378287	3.15303	-321		chrXIII	671110	671539	3.06565	0		chrXI	530484	531197	2.86854	-105
chrX	490577	491398	3.64418	-93		chrXII	843859	844501	3.07932	-102		chrXII	380742	381122	2.85989	110		chrXIII	675408	677079	3.16725	348		chrXI	547534	548668	2.73441	-115
chrX	496145	497628	2.88941	204		chrXII	848593	850098	3.29522	-222		chrXII	390813	392116	3.19903	-58		chrXIII	683661	684668	2.84048	-302		chrXI	549230	550003	2.84875	169
chrX	503185	504218	3.52148	-234		chrXII	852878	856016	4.49432	385		chrXII	395193	396033	3.09708	-93		chrXIII	686999	687693	3.15953	-62		chrXI	551394	552897	2.91747	489
chrX	507186	507994	3.04105	-156		chrXII	857077	857799	3.6831	-102		chrXII	398099	398816	3.16722	-72		chrXIII	688747	689359	3.10469	-30		chrXI	554428	555232	2.9213	-157
chrX	513440	514332	3.58187	-123		chrXII	862033	862799	3.83468	-162		chrXII	399135	399981	3.33832	-99		chrXIII	692889	693631	3.18396	-121		chrXI	559436	559937	2.94201	21
chrX	521882	522230	2.14635	8		chrXII	870930	871854	4.73423	-25		chrXII	412541	413537	3.39219	-242		chrXIII	694886	695665	3.07471	-74		chrXI	561889	562792	2.83514	-44
chrX	524277	525533	3.4877	476		chrXII	873328	875222	3.56528	517		chrXII	423111	423990	3.2994	77		chrXIII	700916	701961	3.21072	-351		chrXI	565458	566502	2.77613	-88
chrX	528230	528943	2.35079	-110		chrXII	879410	880312	3.29612	138		chrXII	426773	427619	3.44758	-133		chrXIII	706571	707418	2.98598	-108		chrXI	566926	568256	2.93731	-327
chrX	529493	530144	2.14932	-42		chrXII	884376	885508	2.67677	-191		chrXII	431301	432473	2.81072	129		chrXIII	715131	716814	2.95841	336		chrXI	570473	571911	2.95449	-283
chrX	531950	532297	1.47026	62		chrXII	892539	893995	4.51525	123		chrXII	433337	434913	3.17284	255		chrXIII	720377	720901	3.14912	14		chrXI	577887	579509	2.91962	-191
chrX	533785	534289	3.17337	10		chrXII	906026	907347	3.29789	-382		chrXII	436873	437355	3.04209	2473		chrXIII	724136	724854	3.12565	-110		chrXI	579924	580663	2.90599	82
chrX	535553	536136	1.70513	-211		chrXII	912111	912747	2.34813	-119		chrXII	439692	440669	2.67323	275		chrXIII	730697	731612	1.49875	-32		chrXI	584611	585409	2.92762	58
chrX	537788	539106	3.07765	-325		chrXII	918690	919175	3.40316	86		chrXII	456905	457561	1.3515	1350		chrXIII	738848	739498	3.07212	-12		chrXI	588879	590731	2.10511	-500
chrX	540050	541415	3.02178	1769		chrXII	924211	924572	3.53121	56		chrXII	466049	466698	1.3515	2584		chrXIII	739917	740488	3.04391	-63		chrXI	592180	593364	2.86046	-53
chrX	542367	542886	3.08602	-125		chrXII	929440	930089	3.38192	-24		chrXII	497818	498525	3.19612	-128		chrXIII	742408	744037	3.08147	252		chrXI	596387	597263	2.9351	-3
chrX	543671	544398	1.46867	-27		chrXII	933571	934716	3.77042	109		chrXII	501920	502571	3.17338	-84		chrXIII	750943	751431	3.16532	53		chrXI	598454	600319	2.77407	294
chrX	545010	545362	2.16781	-11		chrXII	936930	937698	4.37092	-81		chrXII	503846	504979	3.30768	-178		chrXIII	762839	763535	3.13054	3380		chrXI	603926	604565	2.9355	-14
chrX	554539	556180	4.77968	165		chrXII	947141	948633	3.90469	-481		chrXII	505436	506432	3.38721	-200		chrXIII	767839	768214	3.19515	12		chrXI	605179	605740	2.85999	-42
chrX	558890	559634	3.30334	-104		chrXII	957912	958705	2.94155	-119		chrXII	509820	511118	3.44279	-237		chrXIII	770077	770831	2.95431	-347		chrXI	608149	609458	2.84409	-142
chrX	567085	567918	4.18978	-58		chrXII	963298	963950	2.94038	-161		chrXII	517411	518212	3.30417	-128		chrXIII	777821	778171	3.20429	-5		chrXI	619406	619972	2.93334	-116
chrX	569024	569785	2.68232	-6		chrXII	965321	966175	3.89872	-149		chrXII	521798	522249	3.31406	-12		chrXIII	782139	782547	3.16066	-312		chrXI	631352	632682	2.89918	865
chrX	576343	576951	4.06039	-46		chrXII	972930	973779	3.2259	-40		chrXII	523013	523909	3.24273	-171		chrXIII	784130	784829	3.16186	-199		chrXI	633678	636273	2.85511	203
chrX	583231	583952	4.14201	-55		chrXII	982243	982920	2.85205	-312		chrXII	524293	525078	3.3385	-179		chrXIII	788563	789996	3.15189	-397		chrXI	639997	640879	2.94673	-102
chrX	585225	586315	3.0596	-298		chrXII	986860	988560	4.61776	648		chrXII	528027	528646	3.47411	37		chrXIII	795456	796133	3.05556	-10		chrXI	642828	643451	2.86685	2600
chrX	587115	587987	3.30151	-167		chrXII	990381	991131	3.66375	-21		chrXII	534153	534946	3.31176	-157		chrXIII	801498	801964	3.07975	-41		chrXI	649834	650840	2.86774	-2743
chrX	594367	594702	1.76456	-208		chrXII	992835	993403	3.50284	-315		chrXII	539357	539813	3.36132	4		chrXIII	803885	804778	3.17616	-110		chrXI	658120	659088	2.94715	1768
chrX	603947	607020	3.25387	167		chrXII	1005738	1006636	3.00744	-179		chrXII	540354	542203	3.3169	294		chrXIII	808605	809356	3.18434	-1433		chrXI	661594	663105	2.86266	908
chrX	608154	608540	2.24391	42		chrXII	1013913	1014848	4.55885	-110		chrXII	542926	544293	3.19807	-306		chrXIII	813873	814718	3.11372	-316		chrXII	3291	3974	2.95434	668
chrX	608818	611405	3.03956	339		chrXII	1017437	1017948	2.20552	4		chrXII	545435	546421	3.50671	-169		chrXIII	815113	815433	2.93038	38		chrXII	4957	5273	2.92745	-490
chrX	611874	612671	3.49578	-140		chrXII	1021999	1022856	3.50939	-177		chrXII	548499	549298	3.44486	-113		chrXIII	818328	818886	3.19987	-26		chrXII	8852	9694	2.77594	563
chrX	613138	613658	2.18312	985		chrXII	1027647	1028092	4.34996	23		chrXII	551692	552579	3.40786	-134		chrXIII	819966	820527	3.12768	-9		chrXII	10476	10843	2.93676	-824
chrX	614953	615870	2.83333	-164		chrXII	1030023	1031081	3.10087	-282		chrXII	556602	557003	3.32814	15		chrXIII	834825	835520	3.10084	-75		chrXII	15629	16838	2.91417	-162
chrX	616977	618413	2.52895	-361		chrXII	1032292	1032812	4.82058	-75		chrXII	559256	559830	3.32317	-8		chrXIII	836637	837336	3.19237	-120		chrXII	25548	27057	2.86133	691
chrX	624619	625042	2.13242	-7		chrXII	1035572	1036359	3.83216	-127		chrXII	561395	562303	3.2881	-117		chrXIII	841299	842255	2.98155	-86		chrXII	40167	41044	2.81743	-60
chrX	628502	629254	2.60068	166		chrXII	1042653	1043217	4.12678	51		chrXII	564222	565044	3.47199	-102		chrXIII	845116	845840	3.06399	-93		chrXII	46177	47128	2.87889	-19
chrX	636513	638085	3.4968	269		chrXII	1043475	1044161	3.19786	-180		chrXII	565842	567118	3.17173	-199		chrXIII	848313	848979	3.13299	-39		chrXII	48969	50147	2.85673	-380
chrX	638736	639105	2.46632	54		chrXII	1052828	1053564	3.43226	-433		chrXII	571619	572062	3.38052	17		chrXIII	851225	851839	3.11787	59		chrXII	52213	52738	2.8267	114
chrX	640072	642222	3.74304	322		chrXII	1054918	1055476	3.73418	127		chrXII	573637	574180	3.21981	9		chrXIII	854581	855154	3.14989	73		chrXII	63436	63874	2.94545	-10
chrX	643841	644573	3.384	-106		chrXII	1056350	1057633	4.09786	-221		chrXII	578730	579431	3.1253	-57		chrXIII	856649	857259	3.16314	-12		chrXII	65764	66989	2.93415	141
chrX	646269	647040	2.59363	-165		chrXII	1058818	1059589	3.10788	1683		chrXII	581414	582139	3.36661	-6		chrXIII	865107	865522	3.05192	35		chrXII	67943	69253	2.82312	18
chrX	653803	654561	3.11686	56		chrXII	1067754	1068397	3.81201	-723		chrXII	589185	589631	3.4471	54		chrXIII	869395	869804	3.14005	27		chrXII	72099	73887	2.70307	153
chrX	655737	656185	3.25214	2		chrXII	1074400	1075258	5	2321		chrXII	602286	604160	3.20141	-760		chrXIII	872414	873287	2.94179	-226		chrXII	76403	77087	2.78161	2
chrX	658429	659146	2.92859	-99		chrXIII	3065	4141	4.27587	1081		chrXII	604597	605164	3.25524	-94		chrXIII	874050	875113	3.0964	-245		chrXII	79935	80417	2.87443	29
chrX	664335	665445	2.17356	129		chrXIII	13906	15201	4.43059	199		chrXII	605449	605932	3.5332	-904		chrXIII	892082	892499	3.17048	-70		chrXII	109078	109654	2.84891	-394
chrX	666958	667985	3.2887	-172		chrXIII	16424	17341	3.42315	-181		chrXII	609262	610217	3.20513	-43		chrXIII	895167	895776	3.19272	-46		chrXII	111131	112448	2.74272	-215
chrX	669371	669738	2.27956	33		chrXIII	23395	24339	4.6459	-184		chrXII	614264	614944	3.52322	-151		chrXIII	896409	896919	2.95181	5		chrXII	114047	114983	2.84043	-1917
chrX	672424	673240	2.54168	-159		chrXIII	26802	27165	2.54952	54		chrXII	617058	617752	3.2114	-87		chrXIII	897367	897774	3.13612	32		chrXII	121066	121638	2.90657	30
chrX	675598	676057	2.61477	24		chrXIII	41538	42284	3.92189	-117		chrXII	619987	620588	3.26824	-185		chrXIII	898214	898780	3.20956	92		chrXII	125592	128101	2.64946	-676
chrX	676564	677270	3.13723	-54		chrXIII	43236	44319	5	-203		chrXII	623424	624466	3.45061	-62		chrXIII	901076	901835	3.20644	-149		chrXII	130462	132670	2.27319	-152
chrX	678325	679055	2.80092	16		chrXIII	51436	51899	3.98433	28		chrXII	626145	627373	3.18296	171		chrXIV	3063	4031	3.07667	2030		chrXII	135966	136795	2.91933	36
chrX	684189	684856	2.80308	-44		chrXIII	54180	54955	2.7783	-225		chrXII	633147	633796	2.99866	-118		chrXIV	19000	19788	3.10814	-92		chrXII	140883	141667	2.75445	202
chrX	695464	696196	3.87767	-76		chrXIII	55787	56709	4.34263	21		chrXII	644824	645432	3.2092	-155		chrXIV	22420	23414	3.20355	-284		chrXII	142467	143516	2.94165	-209
chrX	696643	697411	2.04414	-114		chrXIII	58366	59183	4.17483	-88		chrXII	668701	670029	3.3224	297		chrXIV	31165	32235	3.17392	-244		chrXII	146105	146597	2.82598	60
chrX	700345	701153	4.0862	-133		chrXIII	61798	62642	4.50722	102		chrXII	672485	673307	3.41451	-235		chrXIV	33921	34996	2.89705	-224		chrXII	147295	148062	2.83578	-211
chrX	703977	704314	1.84162	-50		chrXIII	67308	68709	4.49752	-285		chrXII	675231	675904	3.45543	-113		chrXIV	37339	37959	3.17539	-51		chrXII	150549	151284	2.67886	3027
chrX	708685	709497	2.57437	616		chrXIII	79443	80262	3.81455	-56		chrXII	679624	680444	3.4782	-166		chrXIV	40493	40804	3.12162	30		chrXII	155960	156690	2.95284	9
chrX	709929	711949	3.63595	-1232		chrXIII	81852	83456	3.80771	-34		chrXII	690604	691729	3.37517	-138		chrXIV	44059	44941	3.16732	53		chrXII	157469	158528	2.8607	-269
chrX	717022	718469	2.54976	166		chrXIII	98962	100143	4.65425	64		chrXII	693954	694654	3.52693	-74		chrXIV	47630	48517	1.91533	-52		chrXII	159412	160300	2.85849	-193
chrX	721490	722034	2.84012	-1053		chrXIII	101604	102290	4.90358	85		chrXII	696557	697296	3.38984	-97		chrXIV	51478	51863	3.18672	17		chrXII	163914	164827	2.8064	-21
chrX	723386	725855	3.03435	-1163		chrXIII	103999	104949	3.99273	-303		chrXII	699328	699850	3.35399	-94		chrXIV	52148	52990	3.16193	-93		chrXII	165845	166650	2.92067	-165
chrX	728430	731042	4.28009	-140		chrXIII	108378	109146	4.47838	-44		chrXII	706847	707750	3.25277	-61		chrXIV	55604	56110	2.85926	40		chrXII	167441	168473	2.93199	-155
chrX	733644	734681	3.93639	1723		chrXIII	109872	112259	1.98238	64		chrXII	710283	710731	2.92351	-371		chrXIV	57395	58486	3.10331	-214		chrXII	168717	169489	2.88108	0
chrX	735591	738675	2.45164	1089		chrXIII	109872	112259	1.98238	64		chrXII	711848	712430	3.46663	-81		chrXIV	59527	60563	3.08664	-252		chrXII	174325	175798	2.82851	-80
chrXI	5360	7185	2.63957	166		chrXIII	121102	121779	3.11091	-117		chrXII	714622	715400	3.48275	-78		chrXIV	66096	66896	2.84859	-21		chrXII	176950	178400	2.91291	67
chrXI	7654	8810	3.34474	2125		chrXIII	129398	129998	2.225	-331		chrXII	717683	718296	3.39309	-12		chrXIV	76287	77108	3.15679	-115		chrXII	178866	180266	2.86602	40
chrXI	12307	14757	1.97931	-953		chrXIII	132362	133764	3.83889	-412		chrXII	719211	720728	3.53695	400		chrXIV	80170	80848	3.07485	-131		chrXII	183114	183965	2.95091	-83
chrXI	23697	25542	2.71919	-595		chrXIII	135281	135741	4.12492	11		chrXII	734032	734789	3.30462	-1858		chrXIV	82618	83222	3.21128	114		chrXII	192842	194722	2.87218	-501
chrXI	30464	31057	2.33552	-74		chrXIII	139843	140976	4.24214	-196		chrXII	743608	744386	3.36963	-134		chrXIV	85600	86486	3.00323	-175		chrXII	196234	196736	2.95151	-13
chrXI	31473	31919	1.91782	-3		chrXIII	141580	142603	4.24928	-118		chrXII	745161	748167	3.43005	447		chrXIV	89998	90441	3.20909	-83		chrXII	202783	203641	2.95604	-78
chrXI	33860	34588	2.23392	-117		chrXIII	145594	146040	3.42399	59		chrXII	751527	752194	3.51611	-92		chrXIV	91634	92104	3.2051	-125		chrXII	204570	205457	2.82021	23
chrXI	44678	45609	2.42685	1151		chrXIII	148344	149274	3.66616	-126		chrXII	756801	757850	3.46324	286		chrXIV	103773	104509	3.1573	-39		chrXII	208150	209089	2.92431	-141
chrXI	46839	47442	2.3492	-16		chrXIII	151300	152792	3.61402	175		chrXII	758464	759793	3.53133	-296		chrXIV	112615	113158	3.18389	-384		chrXII	214063	214823	2.76104	13
chrXI	47787	48420	3.01664	-90		chrXIII	164214	165637	3.50366	136		chrXII	762044	762528	3.27547	56		chrXIV	118893	119596	3.21413	-23		chrXII	221985	222491	2.86109	-106
chrXI	49568	50317	3.44976	-108		chrXIII	169582	169931	3.10889	-3		chrXII	763845	765141	3.11691	-315		chrXIV	122477	123188	3.10783	-50		chrXII	228044	228665	2.90256	241
chrXI	53386	53952	3.35427	-35		chrXIII	172857	173854	3.3473	217		chrXII	766093	766947	3.49828	-22		chrXIV	128869	129367	3.15166	-34		chrXII	231778	232159	2.86824	44
chrXI	63262	63731	3.13249	-138		chrXIII	177722	178667	4.78939	110		chrXII	771475	772247	3.50302	-79		chrXIV	135299	135961	3.21004	-247		chrXII	237414	237956	2.94964	18
chrXI	73657	74553	2.30829	-240		chrXIII	180976	181737	3.97321	-117		chrXII	777539	778351	3.47723	-81		chrXIV	140624	141074	3.08714	-29		chrXII	241411	241815	2.90794	-206
chrXI	75330	75990	1.91906	-126		chrXIII	191440	192065	2.70819	14		chrXII	778726	779446	3.42579	-129		chrXIV	145012	145785	3.08081	-118		chrXII	245046	247532	2.75031	-217
chrXI	78394	78960	2.46244	-31		chrXIII	195484	195931	3.6034	47		chrXII	787071	787830	3.42569	-213		chrXIV	146259	146783	2.87559	94		chrXII	248369	249990	2.88038	-754
chrXI	80349	81389	4.94821	-166		chrXIII	203950	204674	4.6139	-209		chrXII	792184	793819	3.37388	-1956		chrXIV	147597	148558	3.05461	-134		chrXII	252827	253212	2.81719	60
chrXI	82841	83148	1.67274	48		chrXIII	205021	206018	2.92261	-112		chrXII	802068	802599	3.47224	62		chrXIV	160147	160734	3.19971	-68		chrXII	254961	255624	2.73543	-13
chrXI	84425	84884	1.89643	-49		chrXIII	213750	214468	4.89011	-80		chrXII	806878	807446	3.45033	-223		chrXIV	172007	172529	3.17125	18		chrXII	260244	261309	2.71327	-202
chrXI	88326	89221	2.65322	12		chrXIII	215909	217622	3.87943	331		chrXII	808332	809034	3.35282	1298		chrXIV	174765	175666	3.19744	-194		chrXII	264237	265519	2.77539	-578
chrXI	90960	92298	1.44952	-93		chrXIII	225016	225510	4.14101	102		chrXII	818095	818590	3.50807	-969		chrXIV	182332	183214	2.72598	-102		chrXII	266583	267443	2.74898	-95
chrXI	93073	93690	2.51539	-84		chrXIII	228425	229172	3.32708	-135		chrXII	830106	831197	3.29079	-288		chrXIV	185011	185700	3.2115	-104		chrXII	270343	271357	2.71692	-140
chrXI	112271	112987	4.30404	-126		chrXIII	230221	231380	2.925	12		chrXII	841088	841604	3.53572	15		chrXIV	187912	188317	3.03919	64		chrXII	273583	275159	2.51333	-456
chrXI	114412	115285	1.65778	-222		chrXIII	233051	233903	3.94759	20		chrXII	843832	844504	3.49715	-114		chrXIV	191065	191490	3.19767	-46		chrXII	278249	279465	2.67744	-5
chrXI	122026	122764	2.91014	-122		chrXIII	236407	236882	4.2985	57		chrXII	848831	850050	3.43951	238		chrXIV	201882	202469	3.15665	-252		chrXII	286332	287077	2.92867	-115
chrXI	125271	126056	3.00857	-95		chrXIII	241640	242286	3.22772	-427		chrXII	852910	856060	3.47479	423		chrXIV	206648	207230	3.20108	9		chrXII	287804	288314	2.86458	143
chrXI	126770	127654	2.90346	-263		chrXIII	242691	244526	3.64157	384		chrXII	857045	857739	3.38078	-148		chrXIV	211594	212003	3.02177	-123		chrXII	290958	292010	2.85865	1272
chrXI	130244	130896	2.56145	-64		chrXIII	247155	248042	4.08282	-78		chrXII	862083	862726	3.30725	-151		chrXIV	214343	215225	3.04967	-139		chrXII	293004	293789	2.95359	175
chrXI	133162	134918	1.49913	94		chrXIII	251200	251995	4.77659	-82		chrXII	871068	871818	3.47988	-76		chrXIV	218539	218857	2.73171	-36		chrXII	295809	296774	2.86335	-198
chrXI	133162	134918	1.49913	94		chrXIII	259734	260443	1.98961	-132		chrXII	873266	875281	3.53207	518		chrXIV	220227	220879	3.20119	-92		chrXII	301388	303331	2.75817	117
chrXI	141120	141556	2.10557	-647		chrXIII	262535	263772	2.81969	-329		chrXII	877252	878366	3.33778	-473		chrXIV	222151	222645	3.09787	33		chrXII	315567	316468	2.86912	-89
chrXI	145388	146382	2.35238	189		chrXIII	272983	273338	2.79722	43		chrXII	879389	880127	3.38302	35		chrXIV	226861	227599	3.19283	-131		chrXII	319973	320899	2.92368	-265
chrXI	148626	149303	2.99161	-127		chrXIII	273615	274217	2.43139	-101		chrXII	884507	885543	3.21818	-263		chrXIV	228667	229506	3.14407	-7		chrXII	329604	329919	2.60627	-524
chrXI	152419	153586	2.58578	-266		chrXIII	275610	276312	4.47374	-84		chrXII	892569	893925	3.39501	143		chrXIV	230394	231191	3.07788	1699		chrXII	331744	332965	2.59023	-235
chrXI	154254	155724	2.85377	-2		chrXIII	284311	285022	3.32091	-433		chrXII	906217	907347	3.39627	-297		chrXIV	233441	233945	3.1596	2		chrXII	336938	337686	2.88875	-47
chrXI	161061	161813	2.3818	-95		chrXIII	296551	296888	3.48426	18		chrXII	912106	912657	2.88211	-72		chrXIV	237541	238624	3.08788	-155		chrXII	343240	344245	2.92657	24
chrXI	168526	168918	2.41911	107		chrXIII	298707	299104	3.31561	38		chrXII	914624	915229	3.31113	-35		chrXIV	244027	244663	3.20756	-123		chrXII	344932	346904	2.69328	23
chrXI	176012	177172	3.9126	-111		chrXIII	307423	309256	2.42919	851		chrXII	918779	919198	3.40971	30		chrXIV	245359	245830	2.94998	-22		chrXII	363448	364356	2.94077	-164
chrXI	180255	180842	2.34759	-230		chrXIII	311716	312550	4.74352	-23		chrXII	928356	929014	3.37474	-58		chrXIV	246950	247605	3.06369	-174		chrXII	373203	373660	2.8143	1812
chrXI	182714	183026	1.48785	-88		chrXIII	314906	315631	1.60559	-108		chrXII	929447	930114	3.47113	-8		chrXIV	250123	250463	3.19444	22		chrXII	380705	381126	2.76624	94
chrXI	188457	189474	3.49782	-326		chrXIII	318084	319029	4.24418	-123		chrXII	932406	933096	3.24173	-216		chrXIV	251469	252208	3.20676	-220		chrXII	390893	392193	2.89856	-57
chrXI	191213	191932	2.7909	-131		chrXIII	321468	322201	4.64799	-40		chrXII	933472	934747	3.31282	143		chrXIV	255043	255590	3.13089	-36		chrXII	395226	396016	2.89152	-101
chrXI	192797	193505	3.08373	-81		chrXIII	323015	323705	3.23499	60		chrXII	936912	937745	3.43651	-96		chrXIV	257877	258633	3.20163	-100		chrXII	398031	398839	2.84511	-95
chrXI	194295	195464	3.24784	-14		chrXIII	325243	326010	2.87394	-192		chrXII	947107	948645	3.44834	-492		chrXIV	263084	263604	3.08225	-141		chrXII	399179	399985	2.79248	-75
chrXI	195872	196514	1.96211	-165		chrXIII	327302	327854	3.11395	96		chrXII	957906	958666	3.42653	-142		chrXIV	269668	270540	3.12777	-511		chrXII	412762	413633	2.73873	-83
chrXI	200053	200621	2.35953	-170		chrXIII	336985	338072	4.13434	216		chrXII	963274	963955	3.3181	-170		chrXIV	274196	274597	3.09809	29		chrXII	423029	424007	2.94381	44
chrXI	201467	202202	1.84944	-64		chrXIII	340468	341551	3.40983	-132		chrXII	965360	966068	3.51078	-154		chrXIV	283934	284275	3.12	-155		chrXII	426803	427707	2.94442	-74
chrXI	203177	203774	1.84423	-65		chrXIII	343254	344078	4.39762	-146		chrXII	972924	973695	3.45922	-85		chrXIV	287534	288032	3.12444	-211		chrXII	431124	432468	2.8966	220
chrXI	204726	205734	1.93003	-477		chrXIII	355262	355616	2.20829	55		chrXII	986830	987519	3.42778	113		chrXIV	292409	292930	3.08396	-1		chrXII	433260	435102	2.89158	282
chrXI	210033	210736	1.94684	-208		chrXIII	366416	367848	4.79971	151		chrXII	987762	988569	3.50063	-262		chrXIV	295698	296327	2.62177	-504		chrXII	436841	437318	2.69083	2439
chrXI	212719	214264	3.64182	-494		chrXIII	382577	383353	3.65892	-67		chrXII	992806	993466	3.35114	-298		chrXIV	297374	298537	3.10803	-329		chrXII	439642	440648	2.84563	311
chrXI	217148	217500	2.17833	-20		chrXIII	390350	391429	3.84389	-209		chrXII	1005802	1006633	3.52887	-160		chrXIV	304340	304815	3.1941	37		chrXII	442444	443045	2.85242	-8
chrXI	218675	219552	2.70544	-12		chrXIII	392232	393033	4.65006	-118		chrXII	1013924	1014756	3.46173	-151		chrXIV	308360	308977	3.15151	-57		chrXII	444776	445277	2.85324	-339
chrXI	222797	223440	2.35795	166		chrXIII	399653	400160	3.15973	205		chrXII	1017503	1018051	3.22894	-80		chrXIV	310325	310829	3.13186	-59		chrXII	466089	466504	2.6851	2661
chrXI	234253	234763	2.55779	82		chrXIII	401119	401997	3.96396	17		chrXII	1022013	1022796	3.51221	-154		chrXIV	318725	319235	3.2013	-171		chrXII	497768	498406	2.78509	-43
chrXI	236857	237644	2.65611	15		chrXIII	405180	406620	3.42648	-327		chrXII	1027660	1028183	3.50196	-29		chrXIV	321392	321945	2.93649	-310		chrXII	501910	502591	2.87269	-89
chrXI	242424	242866	2.27435	-62		chrXIII	411056	411827	3.36113	-127		chrXII	1029580	1031057	3.29324	-515		chrXIV	323273	324240	3.05757	-75		chrXII	505516	506467	2.9144	-142
chrXI	261582	262378	3.38593	-297		chrXIII	412562	414189	4.16292	97		chrXII	1032237	1032808	3.53347	-104		chrXIV	325990	327025	3.02592	-188		chrXII	509633	511052	2.75545	-111
chrXI	269238	269851	2.46167	-86		chrXIII	419799	420238	3.33238	10		chrXII	1035645	1036320	3.52196	-110		chrXIV	329100	330466	3.14101	290		chrXII	517321	518286	2.76581	-134
chrXI	271476	272517	2.52671	119		chrXIII	421960	422641	3.69603	-152		chrXII	1042681	1044066	3.5193	-388		chrXIV	331862	332720	3.11855	-306		chrXII	520680	521016	2.7981	1164
chrXI	272935	273765	2.85752	-44		chrXIII	424362	425204	3.05821	-55		chrXII	1052892	1053612	3.52069	-377		chrXIV	339067	339845	3.17838	-109		chrXII	521818	522202	2.88164	2
chrXI	274783	275490	3.2077	-146		chrXIII	429429	430483	3.33948	-329		chrXII	1054871	1055541	3.49738	136		chrXIV	345895	346573	3.21116	-79		chrXII	523085	523974	2.80472	-102
chrXI	282089	283058	2.79804	-245		chrXIII	451102	451533	3.19503	47		chrXII	1056400	1057594	3.49821	-226		chrXIV	348225	349014	2.93607	-99		chrXII	524258	525178	2.95588	-147
chrXI	284581	285139	2.48776	-170		chrXIII	453302	454303	4.50235	-212		chrXII	1058826	1059667	3.49498	1640		chrXIV	351422	351835	3.21209	-49		chrXII	528023	528899	2.95266	161
chrXI	286363	286865	1.55867	11		chrXIII	455651	456395	3.78293	198		chrXII	1060814	1061586	3.2835	-313		chrXIV	365570	367036	3.10968	270		chrXII	534142	534575	2.82566	34
chrXI	288603	289359	5	136		chrXIII	460208	460915	3.12914	-35		chrXII	1065475	1065794	3.30833	-321		chrXIV	369909	370625	3.16328	-101		chrXII	536912	537522	2.88652	-55
chrXI	290048	291613	2.91825	-622		chrXIII	462300	463363	3.09689	-223		chrXII	1067726	1068405	3.48108	-713		chrXIV	374983	375749	1.5285	45		chrXII	539346	539771	2.90292	30
chrXI	294094	294761	3.25042	-120		chrXIII	464561	465240	3.54619	-74		chrXII	1071978	1072413	3.441	-312		chrXIV	378202	378969	2.98043	-181		chrXII	540382	541069	2.90806	-190
chrXI	295907	296703	3.19945	-112		chrXIII	478503	479227	3.13819	801		chrXII	1074402	1075071	2.97987	2229		chrXIV	382669	384185	3.20671	-560		chrXII	545329	546408	2.93384	-228
chrXI	298895	299741	2.89604	-264		chrXIII	479912	480519	1.50891	-26		chrXIII	3162	4169	3.46022	1018		chrXIV	386852	387552	3.10224	-25		chrXII	548451	549319	2.93339	-116
chrXI	302048	303532	2.36828	-2324		chrXIII	480838	482414	2.57285	-1388		chrXIII	4858	5173	3.10315	-332		chrXIV	392673	393168	3.02916	29		chrXII	551620	552604	2.85544	-152
chrXI	306781	308113	3.00637	162		chrXIII	486464	486784	2.68568	37		chrXIII	8540	9987	2.85733	-934		chrXIV	398085	398422	3.1362	116		chrXII	556610	557062	2.81778	48
chrXI	309775	310388	1.48464	-117		chrXIII	493343	495441	3.44885	103		chrXIII	14046	15125	3.53687	167		chrXIV	400244	401413	2.5122	-211		chrXII	559214	559902	2.89237	7
chrXI	313438	314811	3.62667	-687		chrXIII	496526	497920	4.26935	226		chrXIII	16680	17272	3.29894	-88		chrXIV	405412	406204	3.18219	-244		chrXII	561027	562506	2.74622	-35
chrXI	321462	321764	2.28563	-95		chrXIII	501611	502468	4.06807	-149		chrXIII	23377	24213	3.4543	-112		chrXIV	407593	408632	3.00654	-228		chrXII	563706	565195	2.91701	80
chrXI	333664	334213	3.66822	30		chrXIII	510111	510495	2.7892	45		chrXIII	26745	27204	3.40775	45		chrXIV	417485	418996	3.17104	247		chrXII	565588	566830	2.85209	72
chrXI	335924	336277	1.77577	56		chrXIII	511918	513822	3.24577	-723		chrXIII	41558	42288	3.46654	-129		chrXIV	419570	420287	3.2075	-103		chrXII	571615	572060	2.8849	20
chrXI	346442	347135	2.9094	-25		chrXIII	517288	517745	4.58349	-22		chrXIII	51373	51947	3.47069	20		chrXIV	424226	424897	2.50553	-67		chrXII	573590	574185	2.88373	30
chrXI	348938	349662	3.17256	-163		chrXIII	521644	522398	3.22128	-232		chrXIII	54216	55012	3.49054	-179		chrXIV	439035	439673	3.13221	-71		chrXII	578727	579497	2.89211	-88
chrXI	352475	354363	3.56764	-74		chrXIII	523088	524009	2.93333	-147		chrXIII	55951	56778	3.46289	-96		chrXIV	446833	447537	3.2109	-345		chrXII	581102	582063	2.73936	188
chrXI	357960	358664	2.56072	-163		chrXIII	527248	528112	4.96166	-124		chrXIII	58397	59229	3.53031	-126		chrXIV	450324	450906	3.11758	-256		chrXII	589182	589767	2.90758	121
chrXI	359613	360366	2.90569	-153		chrXIII	531654	532515	2.81447	-34		chrXIII	61982	62683	3.43311	-11		chrXIV	451864	452536	3.11201	-208		chrXII	604546	605169	2.94504	-71
chrXI	364504	365610	1.37502	-548		chrXIII	534511	535619	1.62584	-367		chrXIII	67278	67789	3.50793	15		chrXIV	456220	456743	3.11261	-83		chrXII	605468	605910	2.90159	-902
chrXI	371528	371992	3.27957	-69		chrXIII	544519	546295	4.02994	252		chrXIII	68048	68598	3.5224	29		chrXIV	459152	460072	3.12795	1908		chrXII	609235	610351	2.83375	10
chrXI	374061	374645	2.64962	-152		chrXIII	547558	547885	2.78104	8		chrXIII	76733	77549	3.3092	-101		chrXIV	465944	467132	2.93479	204		chrXII	614325	615050	2.93701	-67
chrXI	375044	375737	3.06184	-65		chrXIII	562144	563234	3.31206	-161		chrXIII	79448	80283	3.46556	-43		chrXIV	470895	471696	2.9434	-81		chrXII	617045	617816	2.9481	-102
chrXI	379033	379616	2.7619	2533		chrXIII	564033	564729	4.08938	-54		chrXIII	81841	83414	3.49126	-8		chrXIV	473192	473634	3.10511	22		chrXII	623293	624511	2.93949	-19
chrXI	385551	385990	2.74851	13		chrXIII	567670	568859	2.7544	-83		chrXIII	92100	92408	3.14867	19		chrXIV	476339	477027	3.14881	-64		chrXII	626132	627385	2.85463	171
chrXI	391963	392697	4.15055	-51		chrXIII	571694	572574	4.21324	-90		chrXIII	98976	100067	3.19165	33		chrXIV	485146	485931	2.40455	-68		chrXII	633140	633774	2.77501	-103
chrXI	393076	393993	2.6942	-162		chrXIII	574387	575339	3.54148	65		chrXIII	101567	102225	3.29754	34		chrXIV	493161	493589	3.16285	9		chrXII	668630	670028	2.78024	333
chrXI	396828	397490	3.48372	89		chrXIII	577249	577995	3.06985	-96		chrXIII	103975	104956	3.14479	-304		chrXIV	509882	510873	1.71363	-162		chrXII	672527	673332	2.8716	-201
chrXI	398242	398799	3.72547	229		chrXIII	583694	584630	4.22616	-241		chrXIII	108377	109128	3.41259	-53		chrXIV	514654	515426	3.18415	-105		chrXII	675172	675911	2.75083	-87
chrXI	401823	402806	2.57793	-235		chrXIII	586169	586613	3.68067	-3		chrXIII	109854	111142	3.00669	251		chrXIV	525170	526388	3.03902	-307		chrXII	677399	678289	2.82366	-120
chrXI	403593	404409	4.29074	-101		chrXIII	589192	590468	3.04534	-280		chrXIII	111557	112210	3.48147	19		chrXIV	532429	532927	3.16229	19		chrXII	679594	681255	2.87609	225
chrXI	406866	407303	1.69778	156		chrXIII	592384	593291	4.40967	-210		chrXIII	121095	121784	3.42923	-116		chrXIV	537655	538447	3.01498	-122		chrXII	686618	687494	2.94519	146
chrXI	416586	417254	4.16995	-7		chrXIII	594123	595132	3.69038	-155		chrXIII	129439	130044	2.88909	-375		chrXIV	551758	552539	3.18383	-162		chrXII	690510	691754	2.93011	-103
chrXI	417772	418508	3.45974	-117		chrXIII	598874	599685	3.07827	-122		chrXIII	131502	133623	3.42048	-912		chrXIV	553025	553602	3.18044	-66		chrXII	694034	694702	2.94973	-10
chrXI	420824	421529	1.5554	39		chrXIII	605972	606469	3.78795	240		chrXIII	135278	135739	3.52188	9		chrXIV	554808	555304	3.16905	8		chrXII	696470	697298	2.90487	-54
chrXI	425745	426557	3.73673	-91		chrXIII	610174	611863	1.66656	3		chrXIII	139934	140918	3.42632	-212		chrXIV	556780	557237	3.07513	-11		chrXII	699205	699815	2.94831	-15
chrXI	429186	429510	1.9736	46		chrXIII	618046	618791	4.54698	-60		chrXIII	141488	142461	3.36903	-235		chrXIV	573486	574631	3.16833	-447		chrXII	704792	705493	2.81308	-43
chrXI	430366	431086	3.74178	-94		chrXIII	627541	629398	4.34751	281		chrXIII	145625	146075	3.46164	26		chrXIV	578443	579747	2.96514	-322		chrXII	706796	707785	2.84087	-69
chrXI	434491	435517	3.73547	-127		chrXIII	636818	638016	3.78127	-83		chrXIII	151325	153054	3.46982	319		chrXIV	581667	582198	3.18139	13		chrXII	710299	710702	2.80112	-365
chrXI	437256	437942	3.16691	-107		chrXIII	644920	645785	4.51687	-95		chrXIII	158727	159074	3.33019	141		chrXIV	586580	587154	3.10585	-47		chrXII	711785	712378	2.9542	-24
chrXI	442468	443353	3.82615	-189		chrXIII	649547	650258	1.72388	-133		chrXIII	164046	165652	3.52635	59		chrXIV	590883	591692	3.09524	-128		chrXII	714522	715560	2.92495	-48
chrXI	450958	452447	4.12708	269		chrXIII	658945	659811	3.52402	-180		chrXIII	169537	169948	3.47836	11		chrXIV	592567	593431	3.08212	-100		chrXII	717411	718244	2.80537	150
chrXI	456874	458494	2.08933	-630		chrXIII	663983	664944	3.34816	-288		chrXIII	171232	171806	3.2987	-75		chrXIV	597436	598146	3.20265	-252		chrXII	719172	720732	2.91671	418
chrXI	461019	461685	2.76543	-113		chrXIII	671038	671486	3.1099	63		chrXIII	172833	173736	3.39167	146		chrXIV	606382	606885	3.17083	315		chrXII	743592	744422	2.83126	-144
chrXI	462565	464200	2.60563	-576		chrXIII	675417	677064	3.51757	345		chrXIII	177862	178656	3.51973	46		chrXIV	619907	620266	3.18239	20		chrXII	751517	751999	2.95403	11
chrXI	465957	466685	2.92711	-250		chrXIII	683709	684807	4.40831	-209		chrXIII	180814	181704	3.51322	-184		chrXIV	622230	623116	3.13687	-242		chrXII	756765	757525	2.93853	-152
chrXI	473061	473792	1.60286	-78		chrXIII	686980	687679	4.08843	-46		chrXIII	191407	193775	2.96274	-197		chrXIV	626912	627549	3.14503	-89		chrXII	759289	759989	2.8642	159
chrXI	475627	476850	1.36029	-339		chrXIII	692869	693691	4.09409	-101		chrXIII	195517	195977	3.50571	8		chrXIV	634806	635685	3.21417	51		chrXII	763848	765527	2.82301	-120
chrXI	477536	479369	3.05886	115		chrXIII	694892	695752	4.6042	-28		chrXIII	203940	204679	3.50119	-207		chrXIV	639982	640650	3.16441	-80		chrXII	766062	767383	2.84503	181
chrXI	482928	483643	3.39656	-133		chrXIII	696420	697054	3.98155	-59		chrXIII	205142	206001	3.4949	-70		chrXIV	643514	644031	3.13177	29		chrXII	771442	772363	2.94872	-37
chrXI	486923	488254	4.76615	-181		chrXIII	706590	707485	3.72996	-95		chrXIII	213771	214490	3.36538	-58		chrXIV	646553	647772	3.00771	-213		chrXII	777426	778266	2.91594	18
chrXI	489376	490728	3.15158	-397		chrXIII	714965	716883	4.80734	385		chrXIII	215937	216713	3.50935	-110		chrXIV	652692	654026	3.15599	-28		chrXII	778727	779476	2.83615	-113
chrXI	491099	491621	3.11066	-4		chrXIII	720274	721573	3.3165	-271		chrXIII	217014	217583	3.38341	-63		chrXIV	667749	668814	2.99471	-60		chrXII	786991	787827	2.87659	-255
chrXI	493417	494137	2.98559	-480		chrXIII	724095	724904	3.95939	-115		chrXIII	225036	225562	3.36068	66		chrXIV	669855	670713	2.66175	-91		chrXII	792253	792676	2.68959	-1419
chrXI	499521	500509	3.02104	-182		chrXIII	730766	732135	4.58168	-328		chrXIII	228426	229208	3.48991	-120		chrXIV	672172	672718	3.04424	36		chrXII	801967	802555	2.73677	135
chrXI	506259	507174	3.01957	-181		chrXIII	733231	733742	2.87135	-58		chrXIII	230424	231339	3.48913	-69		chrXIV	674355	675214	3.03988	-96		chrXII	806923	807281	2.80206	-283
chrXI	507784	508233	2.95015	70		chrXIII	738773	739507	4.0819	-45		chrXIII	233014	233782	3.47233	-59		chrXIV	678207	679008	3.21139	-120		chrXII	808281	809040	2.91488	1276
chrXI	510377	511088	3.03286	-100		chrXIII	739862	740585	3.86075	-42		chrXIII	235862	236824	3.49552	-245		chrXIV	685392	686217	2.97325	-205		chrXII	818116	818597	2.78228	-955
chrXI	511472	512092	2.75695	15		chrXIII	742367	743263	5	-80		chrXIII	241611	242260	3.51981	-400		chrXIV	687271	687906	3.18409	-46		chrXII	830082	831190	2.87116	-272
chrXI	512831	513327	4.31764	80		chrXIII	743497	744040	4.7295	20		chrXIII	242727	243598	3.47674	-62		chrXIV	699441	699970	3.19462	16		chrXII	841111	841628	2.81467	39
chrXI	521477	522183	2.26483	-118		chrXIII	745881	746593	2.28183	-116		chrXIII	243924	244466	3.47086	46		chrXIV	705769	706476	3.13212	-16		chrXII	843846	844560	2.93706	-79
chrXI	523003	524061	2.46477	437		chrXIII	750751	751407	4.01227	161		chrXIII	247196	247931	3.53223	-113		chrXIV	707296	708781	2.95289	251		chrXII	845665	846313	2.90321	-114
chrXI	526340	527944	3.61755	89		chrXIII	757326	758241	3.17999	534		chrXIII	251204	252052	3.44081	-112		chrXIV	711383	711890	3.19317	7		chrXII	848796	850061	2.91082	250
chrXI	530485	531116	2.59434	-145		chrXIII	767823	768198	3.31828	28		chrXIII	259750	260470	3.4111	-111		chrXIV	713383	713945	2.97788	-9		chrXII	852664	856072	2.77741	306
chrXI	547711	548483	4.27743	-119		chrXIII	777584	778198	3.36804	32		chrXIII	262565	263720	3.40587	-340		chrXIV	720438	720903	3.16357	-24		chrXII	857071	857829	2.94925	-90
chrXI	549242	549947	4.5002	147		chrXIII	782136	782660	3.70581	-367		chrXIII	266649	267336	3.33409	-181		chrXIV	724138	724802	3.0855	-164		chrXII	862041	862852	2.93257	-193
chrXI	551457	551960	3.24697	52		chrXIII	784102	784830	3.14314	-185		chrXIII	270793	271929	3.19563	216		chrXIV	725727	726181	3.0568	-1648		chrXII	870874	871790	2.84824	35
chrXI	554470	555180	2.42453	-162		chrXIII	788632	789961	3.37236	-414		chrXIII	272946	274215	3.45165	-436		chrXIV	726993	728207	3.16998	2586		chrXII	873396	874181	2.57433	-235
chrXI	556222	556714	1.71099	-50		chrXIII	793127	793998	3.18566	-163		chrXIII	275571	276278	3.50607	-120		chrXIV	733511	734583	3.15817	22		chrXII	874830	875251	2.88638	-249
chrXI	559462	559867	2.87322	-1		chrXIII	801260	802007	3.12713	-138		chrXIII	283703	285052	3.47844	276		chrXIV	735982	737055	3.20623	-284		chrXII	877339	878318	2.90616	-453
chrXI	562000	562724	3.89724	-65		chrXIII	803859	804842	3.86329	-105		chrXIII	289281	290718	3.43067	-1134		chrXIV	741802	742569	3.15377	1354		chrXII	884346	885537	2.86647	-191
chrXI	565575	566504	4.03345	-148		chrXIII	808517	809392	3.79219	-1407		chrXIII	296521	296935	3.4988	10		chrXIV	743404	744082	3.18186	-203		chrXII	892405	894068	2.75986	153
chrXI	566979	568080	3.3869	-332		chrXIII	813831	815393	3.3897	-632		chrXIII	298608	299116	3.52486	-6		chrXIV	746536	747169	3.11552	-90		chrXII	906069	907354	2.93813	-367
chrXI	572985	573865	1.69632	-149		chrXIII	819810	820614	4.64382	-44		chrXIII	303021	303427	3.41883	-739		chrXV	21016	22161	3.19012	-278		chrXII	912047	912695	2.89073	-61
chrXI	577967	579477	2.66541	-215		chrXIII	834864	835529	3.67582	-99		chrXIII	306940	309580	3.50836	771		chrXV	47301	48082	2.94961	-118		chrXII	918567	919235	2.93681	118
chrXI	577967	579477	2.66541	-215		chrXIII	836530	837433	3.82218	-115		chrXIII	311693	312534	3.41607	-42		chrXV	48470	49170	3.0757	-44		chrXII	924195	924590	2.91523	55
chrXI	579911	580692	3.30792	90		chrXIII	838049	838415	2.51935	45		chrXIII	318142	319001	3.49999	-108		chrXV	52485	53403	2.87033	-154		chrXII	928356	929072	2.81073	-29
chrXI	584482	585236	3.35236	-93		chrXIII	841280	842273	4.76687	-86		chrXIII	321434	322207	3.44319	-54		chrXV	54849	56793	1.50843	263		chrXII	929390	930172	2.85777	-8
chrXI	589118	590804	4.37534	-434		chrXIII	845081	845914	3.78543	-73		chrXIII	323032	323627	3.49174	30		chrXV	60845	61546	3.15128	-172		chrXII	933553	934838	2.83946	57
chrXI	592193	593115	4.46788	-114		chrXIII	848243	849001	3.51918	-63		chrXIII	325361	326027	3.23656	-183		chrXV	65124	65788	3.14551	-106		chrXII	936858	937824	2.86933	-108
chrXI	596522	597235	3.30425	-57		chrXIII	851251	851718	3.60667	63		chrXIII	327272	327732	3.35182	20		chrXV	69725	70627	3.13385	-132		chrXII	947190	948712	2.80576	-417
chrXI	598603	600139	4.44459	310		chrXIII	854609	855235	3.85483	127		chrXIII	337183	338059	3.52039	-167		chrXV	77203	77820	3.19122	-48		chrXII	957849	958876	2.95514	-65
chrXI	603949	604574	2.6525	-30		chrXIII	856196	857263	3.37844	63		chrXIII	340553	341455	3.46271	-138		chrXV	83370	84159	3.14669	-69		chrXII	963177	963943	2.88632	-225
chrXI	605183	605844	2.74428	-96		chrXIII	863673	864107	3.14997	71		chrXIII	343269	344087	3.44427	-158		chrXV	84941	85354	3.17748	1314		chrXII	965346	966201	2.90304	-123
chrXI	608194	609303	3.18152	-197		chrXIII	865031	865496	3.38799	86		chrXIII	354907	355591	3.31197	-135		chrXV	86323	86973	2.94772	109		chrXII	972878	973770	2.92211	-71
chrXI	615171	616571	2.04934	141		chrXIII	869037	869838	3.6374	189		chrXIII	366433	367440	3.40252	-44		chrXV	99355	99914	3.05113	-174		chrXII	980521	981176	2.68305	-2045
chrXI	619136	619892	2.84239	-291		chrXIII	872373	873431	4.75985	-277		chrXIII	370156	372433	3.20787	-778		chrXV	101047	101752	3.14061	-75		chrXII	981789	982967	2.87731	-516
chrXI	625468	626750	1.43519	245		chrXIII	873764	875163	3.53992	-127		chrXIII	378919	379764	3.24603	-244		chrXV	126360	126857	3.18544	80		chrXII	986849	988573	2.91458	649
chrXI	630640	631071	3.35141	-296		chrXIII	892120	892478	2.68866	-78		chrXIII	382662	383321	3.36977	-94		chrXV	137569	138227	3.18872	-73		chrXII	990468	991097	2.94836	6
chrXI	631546	632517	3.20522	880		chrXIII	895193	895844	3.85568	-93		chrXIII	386631	387319	3.4973	46		chrXV	138700	139516	3.09617	-63		chrXII	992823	993455	2.92784	-295
chrXI	634899	635876	4.20788	-209		chrXIII	896391	896895	4.2291	26		chrXIII	390422	391413	3.51057	-181		chrXV	141101	141517	3.10479	38		chrXII	1001513	1003045	2.89099	-278
chrXI	640049	640827	3.33234	-102		chrXIII	897292	897767	3.65153	73		chrXIII	392248	393026	3.3079	-118		chrXV	142262	143150	3.215	-109		chrXII	1005816	1006692	2.9177	-124
chrXI	642888	643279	1.95982	2544		chrXIII	898045	898899	4.13625	67		chrXIII	396169	397323	3.30055	-331		chrXV	143820	144537	2.83927	-25		chrXII	1013880	1014870	2.80935	-116
chrXI	649635	650750	3.24266	-2887		chrXIII	901030	901978	3.71322	-197		chrXIII	399614	400111	3.40083	161		chrXV	146885	147607	3.21465	-136		chrXII	1017423	1018027	2.90818	-28
chrXI	657980	659022	4.13989	1665		chrXIII	910396	911102	2.05375	1394		chrXIII	401127	401832	3.53417	-61		chrXV	153272	153919	3.20897	-106		chrXII	1021916	1022787	2.95128	-101
chrXI	660712	661768	1.78534	-202		chrXIV	2988	4139	4.78679	2047		chrXIII	405290	406603	3.53367	-357		chrXV	158657	159332	3.18337	-178		chrXII	1027633	1028120	2.84757	16
chrXI	662155	663187	1.90789	1229		chrXIV	12381	14108	1.97515	-22		chrXIII	411078	411815	3.44011	-122		chrXV	181092	181968	1.89059	-103		chrXII	1030190	1031151	2.929	-163
chrXII	3327	4294	2.98333	490		chrXIV	14524	15880	2.81053	370		chrXIII	412579	414140	3.30032	113		chrXV	186451	187387	2.88493	-105		chrXII	1032247	1032944	2.82462	-31
chrXII	5004	5268	2.20794	-469		chrXIV	16959	17777	2.90544	-120		chrXIII	419772	421215	3.45839	-465		chrXV	193167	194038	3.20228	-61		chrXII	1035644	1036384	2.89419	-79
chrXII	8838	9830	3.15886	502		chrXIV	18954	19778	4.41935	-64		chrXIII	421943	422694	3.47731	-170		chrXV	194464	195242	2.80729	-53		chrXII	1042628	1044168	2.88353	-412
chrXII	10511	10804	1.83639	-822		chrXIV	22363	23684	3.37409	250		chrXIII	424412	425244	3.42882	-100		chrXV	196182	196758	3.18166	-37		chrXII	1052855	1053630	2.76999	-386
chrXII	13604	14350	3.76386	-532		chrXIV	27996	28647	2.55494	25		chrXIII	429402	430306	3.43891	-227		chrXV	202382	203012	3.0768	-179		chrXII	1054870	1055524	2.90908	127
chrXII	15727	16857	2.96521	-220		chrXIV	31009	32244	4.17978	-249		chrXIII	448030	448711	3.24306	-285		chrXV	204307	204947	3.14487	-156		chrXII	1056326	1057616	2.93005	-200
chrXII	25440	27094	1.45908	727		chrXIV	33941	35016	4.91785	-217		chrXIII	451074	451549	3.33131	53		chrXV	205578	206098	3.14684	47		chrXII	1059036	1059589	2.90274	1574
chrXII	39305	39596	1.5651	20		chrXIV	37239	38335	4.08007	87		chrXIII	453325	454373	3.33298	-166		chrXV	209993	210488	3.20849	24		chrXII	1065473	1065844	2.82841	-297
chrXII	40180	41005	2.89457	-73		chrXIV	40323	40953	3.66053	19		chrXIII	455579	456203	3.51814	66		chrXV	211735	212611	1.69017	-71		chrXII	1067767	1068408	2.85536	-735
chrXII	46214	47505	2.87912	188		chrXIV	42755	43523	2.98251	-64		chrXIII	460316	460926	3.26066	-94		chrXV	222831	223539	3.15385	-83		chrXII	1071985	1072474	2.7524	-278
chrXII	48431	50128	3.08221	-651		chrXIV	43967	45060	3.11192	67		chrXIII	462372	463441	3.42768	-298		chrXV	230041	230498	3.11651	185		chrXIII	3138	4017	2.92977	1106
chrXII	52169	52738	3.32853	136		chrXIV	47681	48619	5	-128		chrXIII	464591	465249	3.37657	-93		chrXV	232852	234963	3.19732	-272		chrXIII	4814	5176	2.80193	-311
chrXII	63530	63851	2.07917	-46		chrXIV	51485	53142	3.44968	117		chrXIII	478589	479219	3.4693	840		chrXV	246889	247352	3.17286	-29		chrXIII	14414	15182	2.93445	-45
chrXII	66265	66989	2.92636	65		chrXIV	55683	56013	3.49153	49		chrXIII	479924	482506	3.3171	-1025		chrXV	252308	253072	3.13553	-44		chrXIII	16580	17329	2.93204	-109
chrXII	67980	68837	4.32303	-153		chrXIV	57374	58533	4.74123	-201		chrXIII	493426	495265	3.45336	149		chrXV	254852	255434	3.19082	-122		chrXIII	23097	24296	2.84331	-14
chrXII	72853	73760	4.83304	-102		chrXIV	59524	60708	2.21938	-181		chrXIII	497146	497895	3.44729	-72		chrXV	259290	260193	3.18112	-181		chrXIII	26753	27222	2.94616	58
chrXII	76496	77009	2.41988	-6		chrXIV	65921	66918	4.48786	-97		chrXIII	501584	502484	3.44368	-143		chrXV	263270	263772	2.96452	46		chrXIII	41557	42393	2.91255	-181
chrXII	79993	81223	2.4609	89		chrXIV	68594	69053	2.8778	-91		chrXIII	503416	503979	3.31323	-964		chrXV	273423	274468	3.12228	-222		chrXIII	51393	52119	2.90505	116
chrXII	93950	95220	1.34494	-162		chrXIV	76225	77145	4.69231	-102		chrXIII	510085	510520	3.44447	45		chrXV	274764	275164	3.16378	7		chrXIII	54179	55016	2.56913	-195
chrXII	98630	101102	4.8412	335		chrXIV	80142	80986	3.9834	-76		chrXIII	517273	517744	3.50515	-30		chrXV	277843	278283	3.1502	7		chrXIII	55742	56812	2.80627	-8
chrXII	109081	109719	2.52821	-428		chrXIV	82391	83531	4.20435	155		chrXIII	521751	522446	3.42695	-310		chrXV	281258	281856	3.16862	-59		chrXIII	58304	59307	2.88967	-119
chrXII	111269	112402	4.16776	-261		chrXIV	85556	86464	4.3414	-195		chrXIII	523118	523955	3.30237	-159		chrXV	285184	285573	3.12621	47		chrXIII	61422	62712	2.86289	255
chrXII	114064	114834	2.53945	-1983		chrXIV	89988	90455	4.24621	-81		chrXIII	527216	528101	3.37559	-145		chrXV	291826	292285	3.13778	18		chrXIII	67221	68716	2.50305	-325
chrXII	115908	116543	2.51086	-206		chrXIV	91676	92066	3.12512	-123		chrXIII	531609	532390	3.1971	-119		chrXV	296060	296608	3.1537	-214		chrXIII	79401	80301	2.75292	-58
chrXII	120933	121601	3.17662	-55		chrXIV	95003	96045	3.21284	301		chrXIII	544685	546195	3.5014	285		chrXV	303599	304387	1.54961	-10		chrXIII	81736	84111	2.88822	-166
chrXII	125476	126469	1.6846	439		chrXIV	103733	104516	3.59036	-23		chrXIII	552808	553529	3.41075	-193		chrXV	307514	308214	3.15059	-74		chrXIII	97303	98150	2.89119	-356
chrXII	126888	127926	5	-116		chrXIV	118600	119698	4.08375	-119		chrXIII	564022	564703	3.506	-72		chrXV	309982	310619	3.18492	-11		chrXIII	98859	100796	2.70029	339
chrXII	130546	130952	3.03881	-136		chrXIV	121982	123232	4.48469	-276		chrXIII	567811	568811	3.30124	-129		chrXV	315799	317012	3.20414	-231		chrXIII	101621	103023	2.60213	460
chrXII	131241	132455	4.87447	119		chrXIV	128843	129327	4.14956	-1		chrXIII	571747	572528	3.49078	-94		chrXV	326669	327080	3.16293	43		chrXIII	103401	104981	2.76796	-29
chrXII	136050	136770	3.50194	65		chrXIV	135288	136113	4.28821	-318		chrXIII	574519	575321	3.16318	8		chrXV	329044	329632	3.0646	-79		chrXIII	108407	109220	2.81147	8
chrXII	140735	141386	3.684	-12		chrXIV	140657	141072	2.76987	-13		chrXIII	577272	577928	3.44623	-118		chrXV	333152	333858	3.16151	-87		chrXIII	109749	111018	2.88213	137
chrXII	142750	143461	3.37144	-95		chrXIV	144944	146871	4.21126	-627		chrXIII	583809	584629	3.48554	-298		chrXV	347106	347437	3.03283	-322		chrXIII	111637	112236	2.91991	72
chrXII	146112	146569	2.8665	50		chrXIV	147566	148576	4.70128	-141		chrXIII	586209	586649	3.49707	-41		chrXV	360835	361752	3.18785	-118		chrXIII	121026	121742	2.92454	-60
chrXII	147222	148058	2.22569	-250		chrXIV	154405	155190	3.21471	-302		chrXIII	589400	590508	3.2496	-404		chrXV	363945	364463	3.06625	-165		chrXIII	131931	132305	2.69743	-546
chrXII	153776	154446	2.43229	-134		chrXIV	160005	160808	3.71156	-34		chrXIII	592496	593264	3.49191	-252		chrXV	373085	373777	3.01044	8		chrXIII	132888	133869	2.95046	-96
chrXII	156021	156758	3.3457	-56		chrXIV	171966	172653	3.80857	-24		chrXIII	594340	595094	3.47892	-169		chrXV	379516	380018	3.17279	-14		chrXIII	135251	135800	2.92972	26
chrXII	157528	158526	2.81914	-297		chrXIV	174775	175726	3.6083	-159		chrXIII	598924	599591	3.35131	-100		chrXV	386344	387018	3.19587	-144		chrXIII	137329	137820	2.89974	25
chrXII	159411	160298	2.77109	-194		chrXIV	180695	181505	2.41374	-78		chrXIII	602962	603704	3.30855	-251		chrXV	405208	405916	3.15917	-174		chrXIII	139900	140922	2.95069	-197
chrXII	163864	164760	3.07162	-80		chrXIV	182278	183191	4.74813	-127		chrXIII	605918	606427	3.48012	192		chrXV	407874	408679	3.20339	-148		chrXIII	141329	142619	2.89373	-236
chrXII	165877	166698	3.42792	-205		chrXIV	185104	185697	2.70367	-59		chrXIII	616035	616787	3.28933	-155		chrXV	413528	414100	3.2053	-38		chrXIII	145534	146073	2.84799	72
chrXII	167500	169332	3.80828	-614		chrXIV	191090	191564	3.03883	3		chrXIII	618009	618747	3.52701	-101		chrXV	415638	416091	3.19415	42		chrXIII	148358	150002	2.94351	-497
chrXII	170119	170616	2.12646	-87		chrXIV	201995	202515	3.79049	-173		chrXIII	619447	620394	3.34559	63		chrXV	421372	422609	3.17706	-341		chrXIII	151213	152912	2.91898	192
chrXII	171040	171955	2.60139	159		chrXIV	206521	207255	4.02808	-42		chrXIII	622243	623260	3.12748	461		chrXV	440999	441632	2.90944	-153		chrXIII	164029	165418	2.84614	-66
chrXII	174564	175613	3.73926	-107		chrXIV	214386	215276	3.95574	-92		chrXIII	627539	629359	3.31986	260		chrXV	453166	453949	2.8878	-96		chrXIII	172900	173782	2.85225	202
chrXII	177022	178066	4.28536	-64		chrXIV	220184	220902	2.85463	-102		chrXIII	635671	636170	3.214	63		chrXV	457774	458537	3.19369	-336		chrXIII	177297	178694	2.66712	309
chrXII	179261	180239	3.76787	-144		chrXIV	221974	222790	3.71074	49		chrXIII	636773	637785	3.50388	-221		chrXV	464507	465020	2.67814	-7		chrXIII	181153	181874	2.84192	40
chrXII	183162	183967	3.11376	-58		chrXIV	226809	227803	3.5717	-64		chrXIII	645008	645811	3.33796	-152		chrXV	467372	468477	3.03355	-287		chrXIII	191269	192100	2.90345	82
chrXII	184665	185002	1.43998	92		chrXIV	228651	229644	4.46156	54		chrXIII	649472	650252	3.4778	-174		chrXV	471354	472137	3.0424	-126		chrXIII	192555	193740	2.85769	360
chrXII	192996	194666	3.45874	-550		chrXIV	230793	231173	3.61156	1889		chrXIII	658998	659780	3.51582	-191		chrXV	472537	472985	3.15257	36		chrXIII	195447	195988	2.88476	37
chrXII	196280	196984	2.73167	-160		chrXIV	233476	233868	3.25926	23		chrXIII	664091	664889	3.36692	-262		chrXV	474173	474870	3.08486	-72		chrXIII	203865	204707	2.84166	-183
chrXII	197900	198178	1.99389	46		chrXIV	237541	238772	4.26611	-81		chrXIII	671130	671530	3.21008	-5		chrXV	481531	482298	2.89385	-118		chrXIII	205033	205985	2.90147	-101
chrXII	202774	203767	4.12285	-19		chrXIV	244001	244748	4.05135	-93		chrXIII	675371	677258	3.40022	419		chrXV	486634	487177	3.12453	-127		chrXIII	213755	214576	2.70086	-23
chrXII	204546	205247	3.47973	-94		chrXIV	245266	245884	2.52702	-42		chrXIII	683710	684673	3.41673	-275		chrXV	492666	493637	3.16897	-281		chrXIII	215860	216757	2.67526	-126
chrXII	207857	209019	3.44876	-323		chrXIV	246790	247669	4.11186	-126		chrXIII	687017	687720	3.34752	-85		chrXV	502248	502980	3.11816	-162		chrXIII	217018	217631	2.92917	-37
chrXII	214024	214833	3.29422	27		chrXIV	250067	250644	2.57633	-41		chrXIII	688707	689360	3.18086	-49		chrXV	507365	507927	3.18284	-141		chrXIII	221866	222727	2.82377	891
chrXII	221967	222582	2.9554	-143		chrXIV	251495	252174	3.33415	-224		chrXIII	692922	693624	3.4685	-108		chrXV	510865	512055	2.91887	-282		chrXIII	224962	225557	2.94046	105
chrXII	228264	228951	2.35874	-12		chrXIV	255081	255572	3.67098	-26		chrXIII	694966	695635	3.51807	-49		chrXV	516614	516996	3.1948	36		chrXIII	228408	229170	2.92696	-125
chrXII	237488	238102	3.36762	-92		chrXIV	257831	258629	4.11559	-75		chrXIII	696411	697132	3.43612	-24		chrXV	518678	519350	3.1656	-107		chrXIII	230442	231385	2.89132	-101
chrXII	241451	241806	2.50857	-222		chrXIV	263073	263834	2.43358	-251		chrXIII	700965	701993	3.43381	-311		chrXV	522516	523254	3.19721	-142		chrXIII	233150	233926	2.93934	81
chrXII	245021	247435	4.75347	-156		chrXIV	264162	264710	2.76705	17		chrXIII	706617	707391	3.45421	-117		chrXV	524616	525281	3.11281	-135		chrXIII	236374	236891	2.91618	45
chrXII	248274	249978	2.77884	-700		chrXIV	269686	270606	3.49878	-553		chrXIII	715165	716820	3.49182	316		chrXV	531038	531661	3.17005	-158		chrXIII	241642	242316	2.74594	-443
chrXII	252816	253230	2.36429	57		chrXIV	280276	280681	2.72156	47		chrXIII	720390	721623	3.50636	-354		chrXV	533780	534273	3.06699	-48		chrXIII	242632	244537	2.8951	360
chrXII	254808	255584	2.85452	-110		chrXIV	283932	284270	2.47943	-159		chrXIII	724156	724867	3.51328	-114		chrXV	539229	539670	3.21538	15		chrXIII	247172	248027	2.91147	-77
chrXII	260208	261243	3.55997	-179		chrXIV	286075	286685	3.35939	72		chrXIII	730764	732552	3.2639	-535		chrXV	544014	544561	3.17258	-143		chrXIII	251149	251999	2.78735	-58
chrXII	264142	265553	2.82284	-608		chrXIV	287387	288174	3.38713	-213		chrXIII	733142	733710	2.97841	-119		chrXV	546493	546943	3.19191	-139		chrXIII	259769	260462	2.81394	-105
chrXII	266627	267385	4.22403	-88		chrXIV	292372	292897	4.25031	34		chrXIII	738703	739486	3.45775	-90		chrXV	552730	553457	3.08041	-207		chrXIII	262718	263760	2.87645	-244
chrXII	270495	271323	5	-99		chrXIV	295543	296251	4.48628	-388		chrXIII	739887	740519	3.32045	-63		chrXV	554328	554850	2.87297	-19		chrXIII	266716	267402	2.95012	-115
chrXII	278336	279162	4.2287	-113		chrXIV	297358	298644	3.57574	-334		chrXIII	742438	743241	3.50522	-105		chrXV	559561	560118	2.94099	-109		chrXIII	272933	274239	2.66796	-431
chrXII	281162	282553	2.81326	-237		chrXIV	304317	304779	3.88445	67		chrXIII	743511	744011	3.45913	12		chrXV	569286	570052	3.1111	-111		chrXIII	272933	274239	2.66796	-431
chrXII	283770	284217	2.1659	122		chrXIV	308338	309082	3.73842	-98		chrXIII	749520	750031	3.41156	-99		chrXV	570657	571331	3.1625	-187		chrXIII	275649	276353	2.69626	-44
chrXII	286321	287073	3.15966	-123		chrXIV	318655	319232	3.85061	-135		chrXIII	750959	751445	3.53489	38		chrXV	572303	573348	3.19604	12		chrXIII	284360	285041	2.81624	-399
chrXII	287803	288278	2.21829	125		chrXIV	321433	321933	4.62564	-324		chrXIII	757222	757923	3.34259	323		chrXV	574658	575264	3.08538	-137		chrXIII	289185	290686	2.93049	-1198
chrXII	289130	290108	2.1384	-593		chrXIV	323280	324245	3.55495	-69		chrXIII	762838	763608	2.96111	3416		chrXV	586042	586854	3.21179	-124		chrXIII	296515	296940	2.95347	10
chrXII	291187	292124	4.81701	1444		chrXIV	325978	326964	4.53023	-151		chrXIII	767811	768221	3.24636	23		chrXV	592275	593054	3.0982	-78		chrXIII	298664	299150	2.8729	39
chrXII	293246	293802	2.80744	48		chrXIV	329756	330802	3.80425	-50		chrXIII	777604	778197	3.12381	22		chrXV	602161	602836	3.21454	-157		chrXIII	303044	303405	2.88387	-740
chrXII	295874	296760	2.5047	-223		chrXIV	331886	332744	4.04948	-282		chrXIII	782154	782608	3.44496	-350		chrXV	604868	605527	2.99721	-106		chrXIII	307506	308993	2.90752	761
chrXII	301669	303197	4.27211	190		chrXIV	338987	339833	4.19365	-63		chrXIII	784139	784820	3.44672	-199		chrXV	605900	606889	3.08614	-212		chrXIII	311705	312712	2.78702	53
chrXII	315604	316389	3.75462	-110		chrXIV	345847	346592	2.98794	-93		chrXIII	788566	790004	3.49591	-402		chrXV	608817	609652	3.20334	-38		chrXIII	318133	319008	2.94911	-109
chrXII	319974	320917	3.0159	-255		chrXIV	348249	349119	4.67511	-163		chrXIII	797580	798037	3.18813	116		chrXV	611103	612319	2.99496	-288		chrXIII	321496	322288	2.87429	17
chrXII	329608	329935	2.73935	-534		chrXIV	350309	351878	3.45877	154		chrXIII	801264	801983	3.43562	-148		chrXV	616704	617590	3.13238	-476		chrXIII	323007	323806	2.95201	107
chrXII	331821	332728	4.17437	-160		chrXIV	365537	367077	4.34874	274		chrXIII	803890	804771	3.52825	-109		chrXV	618148	618816	3.17754	-194		chrXIII	325337	325985	2.84942	-216
chrXII	336988	337706	3.66101	-82		chrXIV	369839	370641	3.8137	-128		chrXIII	806283	806776	3.42505	-107		chrXV	627716	628251	3.17942	-4		chrXIII	327265	328095	2.84554	198
chrXII	339170	339981	2.5327	-103		chrXIV	375035	375687	5	40		chrXIII	808433	809441	3.50829	-1389		chrXV	632000	632404	3.1772	38		chrXIII	336788	338110	2.81528	136
chrXII	343339	344302	3.14199	-54		chrXIV	378257	378987	3.75869	-145		chrXIII	813945	814718	3.42208	-352		chrXV	633317	634055	3.2035	-120		chrXIII	340560	341460	2.94566	-132
chrXII	363516	364396	3.63713	-160		chrXIV	382397	384228	2.30626	-674		chrXIII	815038	815568	3.20651	8		chrXV	642158	642994	3.13486	-165		chrXIII	343118	344066	2.87667	-72
chrXII	365512	366217	2.4725	1749		chrXIV	386807	387630	4.82897	-8		chrXIII	818324	819000	3.53192	-81		chrXV	643985	644855	3.11472	-88		chrXIII	366348	367903	2.81648	145
chrXII	377051	378282	3.3956	-318		chrXIV	392722	393140	3.36287	39		chrXIII	819872	820496	3.46815	-72		chrXV	647918	649634	3.1525	231		chrXIII	370127	372392	2.77705	-743
chrXII	380750	381103	2.34519	105		chrXIV	397971	398434	3.01827	167		chrXIII	831068	831530	3.29493	30		chrXV	653605	654474	3.13629	-156		chrXIII	378880	379754	2.89937	-269
chrXII	384216	385915	4.25873	342		chrXIV	400217	401349	4.30775	-246		chrXIII	834843	835546	3.5354	-97		chrXV	658413	658899	3.18524	-91		chrXIII	382515	383310	2.85167	-15
chrXII	390829	392109	3.43576	-62		chrXIV	405406	405707	3.24847	7		chrXIII	836619	837754	3.52002	-320		chrXV	661497	662261	3.16933	-205		chrXIII	386280	387235	2.95509	263
chrXII	395226	396021	2.53647	-104		chrXIV	407394	408626	4.51364	-331		chrXIII	841362	842239	3.50728	-110		chrXV	672152	673041	3.18258	-186		chrXIII	390406	391456	2.94155	-168
chrXII	398071	398844	2.94344	-72		chrXIV	411864	413255	3.97969	-211		chrXIII	845134	845842	3.51554	-83		chrXV	675391	676113	3.13957	-187		chrXIII	392197	393126	2.81036	-93
chrXII	399137	399978	3.8957	-99		chrXIV	419571	420369	1.96083	-128		chrXIII	848276	848950	3.44349	-72		chrXV	682034	682821	3.1661	-322		chrXIII	399677	400150	2.92751	212
chrXII	412545	413666	2.89827	-175		chrXIV	424214	424978	4.52014	-101		chrXIII	851178	851829	3.3825	82		chrXV	685563	685954	3.17118	-8		chrXIII	401154	401947	2.95429	10
chrXII	417736	418616	1.82849	-261		chrXIV	439046	439705	3.54698	-93		chrXIII	854577	855218	3.42548	103		chrXV	712306	713158	3.04005	-134		chrXIII	405163	406715	2.78211	-365
chrXII	423011	423983	3.13328	23		chrXIV	446763	447574	3.59199	-329		chrXIII	856618	857242	3.34856	-36		chrXV	716506	717415	2.89187	-124		chrXIII	410975	411841	2.94959	-143
chrXII	426762	427615	3.42397	-140		chrXIV	450347	451330	3.55415	-32		chrXIII	863628	864085	3.37587	38		chrXV	726953	727788	3.14661	-137		chrXIII	412530	414136	2.94412	140
chrXII	431310	432474	2.9871	124		chrXIV	451788	452534	3.05927	-247		chrXIII	865047	865607	3.48331	23		chrXV	733187	733950	3.08186	-112		chrXIII	419735	420379	2.94774	-28
chrXII	433361	434917	4.00675	269		chrXIV	456062	456715	4.40291	-176		chrXIII	866859	867730	3.29589	-204		chrXV	737619	738667	2.98571	-177		chrXIII	421945	422747	2.92928	-197
chrXII	436877	437442	2.46399	2519		chrXIV	457551	457960	2.69464	52		chrXIII	869342	869876	3.50771	18		chrXV	741430	741937	3.20395	-115		chrXIII	424128	425307	2.92408	10
chrXII	439673	440710	1.40201	264		chrXIV	462205	462646	1.52389	15		chrXIII	872408	873301	3.33576	-230		chrXV	744930	745522	3.17581	55		chrXIII	429333	430372	2.90605	-226
chrXII	442445	443154	2.18025	-63		chrXIV	465929	467138	4.23206	200		chrXIII	874025	875074	3.47284	-213		chrXV	747028	747638	3.13316	-51		chrXIII	447961	448634	2.88463	-212
chrXII	444711	445366	2.06691	-351		chrXIV	470870	471769	4.72482	-57		chrXIII	892085	892506	3.45748	-75		chrXV	748707	749560	3.0516	-155		chrXIII	451092	451534	2.83261	52
chrXII	454124	454930	5	135		chrXIV	473214	473974	3.39648	203		chrXIII	895165	895822	3.25647	-68		chrXV	759565	760047	3.18835	24		chrXIII	453342	454398	2.86007	-145
chrXII	456931	457553	5	1359		chrXIV	476271	477074	4.01601	-54		chrXIII	896388	896911	3.46824	19		chrXV	760891	761696	2.91054	-29		chrXIII	455524	456314	2.9107	94
chrXII	463297	464066	5	-1011		chrXIV	478924	479255	1.40023	75		chrXIII	897383	898764	3.5055	-331		chrXV	769181	769684	3.20097	1024		chrXIII	460254	460964	2.89315	-82
chrXII	466068	466691	5	2578		chrXIV	482945	483571	2.85076	-298		chrXIII	901069	901927	3.35432	-191		chrXV	772102	772835	3.20927	-132		chrXIII	462295	463449	2.89243	-263
chrXII	497809	498532	2.60914	-127		chrXIV	485182	485881	4.44956	-75		chrXIV	3069	4003	3.42261	2019		chrXV	774286	774781	3.04672	-39		chrXIII	464555	465264	2.8998	-83
chrXII	500980	501481	1.6245	-182		chrXIV	487982	488634	2.50568	-78		chrXIV	12114	13686	3.41529	-24		chrXV	775338	775957	3.09136	-198		chrXIII	478589	479253	2.79383	857
chrXII	501915	502599	1.81629	-95		chrXIV	493155	493601	3.86245	12		chrXIV	14180	15918	3.39425	217		chrXV	784338	785057	3.15212	-159		chrXIII	479895	480520	2.78195	-18
chrXII	503825	504977	2.79875	-190		chrXIV	509852	510822	4.24012	-125		chrXIV	17100	17815	3.08076	-210		chrXV	786911	787455	3.11231	188		chrXIII	486444	486805	2.86542	38
chrXII	505466	506484	2.9968	-159		chrXIV	514630	515499	3.75199	-130		chrXIV	19030	19772	3.52374	-99		chrXV	791927	792790	2.92993	-118		chrXIII	493360	495315	2.9346	157
chrXII	509815	511126	3.35522	-239		chrXIV	516877	517522	2.75161	-49		chrXIV	22439	23852	3.37316	128		chrXV	796588	797022	3.19773	-12		chrXIII	496442	497922	2.92582	267
chrXII	517432	518207	4.03159	-120		chrXIV	525109	526377	4.24723	-343		chrXIV	28045	28659	3.41429	-5		chrXV	800445	801027	3.19151	-5		chrXIII	501603	502478	2.95367	-150
chrXII	520568	521006	1.38629	1225		chrXIV	532481	533011	3.53042	87		chrXIV	31151	32212	3.42155	-262		chrXV	802042	802789	3.16653	-109		chrXIII	510111	510500	2.8034	42
chrXII	521796	522233	2.84164	-3		chrXIV	537673	538518	4.1917	-77		chrXIV	33952	34945	3.49806	-214		chrXV	803232	804685	3.14974	292		chrXIII	517264	518200	2.84051	193
chrXII	523045	523903	4.50886	-158		chrXIV	541349	543524	3.69119	133		chrXIV	37314	37956	3.49537	-65		chrXV	806734	807244	2.96073	34		chrXIII	521711	522452	2.77557	-293
chrXII	524316	525054	3.20439	-180		chrXIV	551766	552471	3.70254	-132		chrXIV	42869	43445	3.25857	-82		chrXV	813692	814268	3.14519	-4		chrXIII	523064	524130	2.92756	-99
chrXII	528047	528940	2.72889	194		chrXIV	552976	553781	3.1988	-1		chrXIV	44056	44736	3.3945	-51		chrXV	817002	817566	3.1431	-8		chrXIII	527217	528245	2.75318	-73
chrXII	534152	534944	3.09594	-155		chrXIV	554762	555283	4.12026	-25		chrXIV	47643	48581	3.27022	-90		chrXV	820235	821317	3.18118	-247		chrXIII	531313	532443	2.86172	-241
chrXII	536824	537508	2.12844	-106		chrXIV	556713	557387	1.52765	30		chrXIV	55644	56092	3.41574	29		chrXV	826152	826596	3.16645	-11		chrXIII	544492	546261	2.91764	222
chrXII	539357	539805	2.61899	8		chrXIV	569311	569845	3.39816	113		chrXIV	57442	58430	3.50126	-219		chrXV	830436	831173	3.14021	-231		chrXIII	547535	547886	2.70986	-3
chrXII	542825	544337	4.78679	-277		chrXIV	573451	574716	3.20162	-422		chrXIV	59590	60559	3.48171	-222		chrXV	832511	833185	2.85413	35		chrXIII	559052	559423	2.82791	39
chrXII	545394	546473	3.504	-163		chrXIV	578311	579875	4.6377	-320		chrXIV	65901	66849	3.32982	-142		chrXV	840892	841625	3.21185	-74		chrXIII	564078	564792	2.90884	0
chrXII	548531	549281	2.91529	-106		chrXIV	581586	582293	3.8464	20		chrXIV	68542	68949	3.18244	-169		chrXV	844573	845212	3.14779	-263		chrXIII	567779	568855	2.83145	-135
chrXII	551695	552587	4.32578	-129		chrXIV	585143	585434	2.48572	2		chrXIV	76308	77068	3.38038	-105		chrXV	849050	850613	3.12181	197		chrXIII	571657	572658	2.90938	-90
chrXII	553682	554618	1.88349	-428		chrXIV	586540	588208	3.82717	473		chrXIV	80149	80867	3.4719	-132		chrXV	851569	851992	3.17427	58		chrXIII	574277	575373	2.91399	103
chrXII	556611	557017	2.43695	26		chrXIV	590909	591664	3.82386	-127		chrXIV	82478	83181	3.4417	24		chrXV	860068	860553	3.14692	-53		chrXIII	577291	577945	2.79338	-100
chrXII	559220	559827	3.64065	-27		chrXIV	592597	593440	4.36348	-120		chrXIV	85623	86505	3.41006	-154		chrXV	875041	875531	3.12519	35		chrXIII	583715	584615	2.92333	-244
chrXII	561408	562313	4.88342	-129		chrXIV	597359	598585	4.28141	-433		chrXIV	87570	89010	3.25677	393		chrXV	880667	881179	3.20726	-42		chrXIII	586205	586657	2.94243	-43
chrXII	564255	565069	3.65252	-131		chrXIV	606428	606884	2.36862	337		chrXIV	89843	90464	3.50259	-149		chrXV	888423	889313	3.10149	-118		chrXIII	592503	593257	2.79601	-252
chrXII	565743	566809	4.41881	5		chrXIV	619939	620307	3.34212	56		chrXIV	91477	92069	3.32606	-221		chrXV	893987	894390	3.10637	-97		chrXIII	594211	595138	2.94663	-202
chrXII	571621	572121	2.2457	-13		chrXIV	622244	623135	2.92977	-225		chrXIV	94996	95509	3.40856	30		chrXV	896032	896726	3.21385	8		chrXIII	598911	599589	2.86699	-92
chrXII	573131	574193	2.71642	256		chrXIV	634244	636142	3.91844	104		chrXIV	103797	104527	3.42378	-60		chrXV	898105	898743	3.19784	-64		chrXIII	602961	603625	2.79906	-211
chrXII	576605	576981	1.41305	-32		chrXIV	639903	640689	3.27471	-100		chrXIV	105035	105411	3.2848	-1121		chrXV	899657	900463	3.16504	-132		chrXIII	611071	611871	2.85084	157
chrXII	578738	579499	3.20854	-95		chrXIV	643334	644102	3.58464	-26		chrXIV	112552	113379	3.46369	-305		chrXV	912446	913138	2.90717	-30		chrXIII	618078	618815	2.95239	-32
chrXII	581414	582151	4.30938	-12		chrXIV	646355	647808	4.17779	-132		chrXIV	118668	119593	3.52963	-137		chrXV	914909	915368	3.19675	-45		chrXIII	627433	628474	2.87356	-146
chrXII	585440	586524	1.38148	-482		chrXIV	652623	654236	4.12585	43		chrXIV	122131	123186	3.39386	-224		chrXV	920914	921617	2.94848	-204		chrXIII	628859	629425	2.85233	117
chrXII	589218	589614	2.99975	62		chrXIV	667708	668815	4.68799	-40		chrXIV	128889	129407	3.28835	-64		chrXV	922575	923363	3.08134	-64		chrXIII	636755	637645	2.92339	-196
chrXII	592064	593069	2.0545	-524		chrXIV	669825	670731	4.81788	-85		chrXIV	135369	136113	3.46779	-358		chrXV	924795	925774	3.21034	-245		chrXIII	644706	645800	2.84749	5
chrXII	602242	604136	2.38802	-726		chrXIV	672149	672850	4.00669	91		chrXIV	140647	141080	3.39373	-14		chrXV	931785	932399	3.18647	289		chrXIII	649544	650301	2.95022	-113
chrXII	604597	605188	3.57747	-106		chrXIV	674373	675180	3.89957	-88		chrXIV	145015	145812	3.44614	-133		chrXV	939188	939804	2.96138	-147		chrXIII	658983	659983	2.9246	-262
chrXII	605456	605914	3.17989	-898		chrXIV	678206	679037	3.2656	-134		chrXIV	146238	146920	3.34489	36		chrXV	943048	943920	2.88421	-99		chrXIII	663984	664933	2.93798	-293
chrXII	609296	610231	4.2033	-19		chrXIV	685417	686287	4.92522	-158		chrXIV	147638	148556	3.37345	-115		chrXV	959862	960412	3.16581	45		chrXIII	668072	668783	2.87203	-64
chrXII	614320	614935	3.0203	-127		chrXIV	687130	687869	3.35678	-36		chrXIV	154381	155271	3.32492	-274		chrXV	960710	961238	3.05398	-13		chrXIII	671045	671541	2.8243	32
chrXII	617056	617793	3.12464	-107		chrXIV	693751	695939	2.95669	-23		chrXIV	160170	160755	3.4713	-90		chrXV	981214	981962	3.21203	-240		chrXIII	675402	677173	2.91927	392
chrXII	619984	620606	1.36688	-178		chrXIV	693751	695939	2.95669	-23		chrXIV	171998	172673	3.42706	-50		chrXV	994529	995333	3.00014	-76		chrXIII	683666	684686	2.9269	-291
chrXII	623464	624466	3.6028	-82		chrXIV	701354	702006	3.28007	-21		chrXIV	174744	175661	3.48163	-207		chrXV	996875	997365	3.20276	-93		chrXIII	686910	687741	2.87918	-42
chrXII	626130	627357	2.92785	186		chrXIV	705693	706584	3.98805	0		chrXIV	182323	183197	3.40503	-115		chrXV	1000594	1001359	3.20721	-149		chrXIII	688697	689430	2.86519	-19
chrXII	644801	645141	2.11257	2		chrXIV	707328	708834	4.80224	293		chrXIV	185054	185719	3.4706	-73		chrXV	1002958	1003417	3.08563	37		chrXIII	692780	693699	2.90061	-141
chrXII	668704	670035	2.62396	292		chrXIV	711384	711982	3.27561	53		chrXIV	199786	200574	3.26681	-203		chrXV	1009405	1010399	3.17174	-190		chrXIII	694935	695760	2.91177	-2
chrXII	672509	673305	3.26173	-224		chrXIV	713057	714025	3.55655	114		chrXIV	201864	202455	3.48928	-268		chrXV	1017214	1017730	3.12247	180		chrXIII	696361	697134	2.95174	-48
chrXII	675233	675903	2.85677	-113		chrXIV	720471	720859	2.66768	-18		chrXIV	206549	207232	3.22518	-39		chrXV	1025875	1026321	3.12722	91		chrXIII	700953	701990	2.82999	-318
chrXII	677408	678439	2.32652	-200		chrXIV	724056	724816	3.44553	-130		chrXIV	210068	210539	3.1493	71		chrXV	1033965	1034477	3.17476	-39		chrXIII	706553	707435	2.94277	-107
chrXII	679662	680443	3.3371	-147		chrXIV	725783	728283	3.45464	-2727		chrXIV	211484	212058	3.40598	-151		chrXV	1036089	1036958	2.91478	-53		chrXIII	714878	716901	2.89282	419
chrXII	686823	688889	3.6187	-654		chrXIV	733516	734680	3.70172	-29		chrXIV	214328	215237	3.49691	-140		chrXV	1039175	1039907	3.19277	-299		chrXIII	720170	721611	2.94473	-238
chrXII	690563	691731	2.7185	-118		chrXIV	735794	737289	3.49717	-261		chrXIV	220180	220912	3.45486	-99		chrXV	1050586	1051524	3.19663	9		chrXIII	724026	725043	2.92734	-91
chrXII	693932	694644	2.77603	-90		chrXIV	739032	740483	2.9042	-193		chrXIV	222097	222808	3.52997	-22		chrXV	1059032	1060053	3.18953	12		chrXIII	730021	732531	2.72764	-153
chrXII	696542	697314	4.10827	-98		chrXIV	741590	742640	3.64821	1425		chrXIV	226869	227623	3.49888	-124		chrXV	1076235	1077211	1.73848	-61		chrXIII	733247	733764	2.91886	-39
chrXII	699338	699851	3.0336	-100		chrXIV	743332	744103	3.0107	-178		chrXIV	228684	229560	3.51085	28		chrXV	1087383	1088034	2.76547	2236		chrXIII	738817	739531	2.92611	-11
chrXII	704787	705459	2.00912	-63		chrXIV	746460	747270	3.92712	-78		chrXIV	230498	231194	3.41817	1752		chrXVI	2975	3900	3.06992	2012		chrXIII	739842	740660	2.81098	-15
chrXII	706819	707756	4.56935	-72		chrXIV	754578	755842	2.0974	-175		chrXIV	233441	233975	3.3433	-13		chrXVI	13940	14887	2.9617	-59		chrXIII	742351	744121	2.82111	265
chrXII	710291	710716	2.89901	-368		chrXIV	779265	780155	1.67496	-206		chrXIV	237552	238570	3.49843	-177		chrXVI	32790	33337	2.95908	51		chrXIII	750837	751436	2.89523	103
chrXII	711867	712403	2.7275	-77		chrXV	8465	10058	2.50372	-335		chrXIV	240888	241949	3.4786	-270		chrXVI	34715	35497	3.13949	-130		chrXIII	757323	757675	2.76939	249
chrXII	714609	715403	3.07993	-83		chrXV	16509	17239	2.86234	922		chrXIV	244024	244663	3.4036	-124		chrXVI	38797	39441	2.93855	-2		chrXIII	762833	763561	2.80044	3390
chrXII	717666	718298	2.96371	-4		chrXV	17547	19141	1.31441	-548		chrXIV	245273	245876	3.47017	-42		chrXVI	44052	44707	3.09931	-36		chrXIII	767766	768225	2.85126	43
chrXII	719225	720724	3.12153	395		chrXV	20949	24276	3.73333	-1302		chrXIV	246915	247669	3.50564	-169		chrXVI	46186	47483	3.20744	-329		chrXIII	777718	778206	2.85175	-39
chrXII	719225	720724	3.12153	395		chrXV	26124	27457	3.362	-293		chrXIV	250061	250763	3.48514	-97		chrXVI	52398	53251	3.15333	-154		chrXIII	782040	782579	2.93103	-279
chrXII	743622	744389	2.69771	-143		chrXV	44760	45277	4.83774	81		chrXIV	251468	252186	3.51618	-232		chrXVI	67500	67983	3.02669	17		chrXIII	784098	784882	2.94591	-209
chrXII	745104	748610	3.80554	254		chrXV	47255	48061	4.98613	-84		chrXIV	255052	255629	3.53246	-12		chrXVI	69075	69701	3.09207	-97		chrXIII	788469	790021	2.94336	-362
chrXII	751531	752205	3.46976	-99		chrXV	48464	49249	2.99553	-7		chrXIV	257871	258699	3.47657	-130		chrXVI	72795	73207	3.18691	5		chrXIII	793268	793915	2.73475	-134
chrXII	756811	757637	2.77392	-231		chrXV	52483	53395	4.43923	-151		chrXIV	263035	263640	3.40276	-135		chrXVI	85085	85869	3.13393	-109		chrXIII	795397	796153	2.92823	-30
chrXII	759347	759795	3.41311	91		chrXV	54791	57217	5	446		chrXIV	269717	270524	3.50381	-528		chrXVI	87714	88696	3.2008	-172		chrXIII	797544	798005	2.8327	150
chrXII	762023	762503	2.68021	79		chrXV	65035	65802	2.89295	-69		chrXIV	273292	274650	3.38682	-356		chrXVI	100255	100778	3.14222	21		chrXIII	801380	802118	2.87789	-23
chrXII	763840	765183	3.9283	-296		chrXV	69700	70668	4.20533	-140		chrXIV	280222	280725	3.26007	42		chrXVI	102559	103458	3.21156	-223		chrXIII	803818	805017	2.93767	-38
chrXII	766097	766982	2.97882	-2		chrXV	77189	77889	4.09127	-21		chrXIV	281272	281675	3.28506	-921		chrXVI	116718	117316	3.15643	-50		chrXIII	806183	806695	2.90153	-16
chrXII	771471	772252	2.97125	-78		chrXV	83391	84370	4.12866	47		chrXIV	286022	286528	3.47682	-33		chrXVI	117847	118507	3.20582	-205		chrXIII	808436	809371	2.83116	-1356
chrXII	777541	778324	4.0526	-69		chrXV	86339	86937	4.66054	119		chrXIV	287444	288063	3.42799	-240		chrXVI	120952	121984	3.13704	-299		chrXIII	813787	814706	2.81048	-267
chrXII	778688	779409	2.77463	-97		chrXV	101035	101859	3.88778	-28		chrXIV	292448	292899	3.52595	-5		chrXVI	125484	126148	3.03605	-190		chrXIII	818211	818989	2.84078	-19
chrXII	781685	782943	2.33144	140		chrXV	126160	126892	3.99085	163		chrXIV	295599	296298	3.34873	-440		chrXVI	135662	136005	3.19761	44		chrXIII	819927	820627	2.91834	21
chrXII	787070	787830	2.67527	-214		chrXV	127641	128406	2.21382	-104		chrXIV	297312	298589	3.4911	-324		chrXVI	138375	138971	3.17817	-25		chrXIII	834811	835508	2.80287	-62
chrXII	792196	793833	3.48472	-1969		chrXV	135531	136539	3.3854	-185		chrXIV	304356	304810	3.4492	32		chrXVI	146874	147663	3.14716	-147		chrXIII	836566	837469	2.90878	-151
chrXII	801992	802574	3.71063	113		chrXV	137563	138268	3.2386	-91		chrXIV	306994	307612	3.28635	-323		chrXVI	150004	150848	3.17956	-188		chrXIII	840341	842320	2.79485	360
chrXII	806905	807466	2.94641	-199		chrXV	138515	139560	4.3847	7		chrXIV	308297	309086	3.50943	-80		chrXVI	152906	153911	2.53281	-86		chrXIII	845076	845934	2.66965	-66
chrXII	808332	809028	3.8455	1295		chrXV	140885	141752	2.71122	28		chrXIV	309946	310824	3.52627	-251		chrXVI	155911	156672	3.13478	-80		chrXIII	848338	849121	2.93721	45
chrXII	818117	818896	3.63948	-805		chrXV	142035	143170	3.30763	-48		chrXIV	318678	319247	3.42861	-154		chrXVI	157478	158072	3.20962	-67		chrXIII	851181	851767	2.92707	52
chrXII	822480	823235	1.82716	-266		chrXV	143795	144586	5	-13		chrXIV	321431	321985	3.51603	-349		chrXVI	159340	160095	3.19363	-191		chrXIII	854592	855164	2.74478	83
chrXII	830094	831248	2.39733	-307		chrXV	154496	155089	3.08661	-48		chrXIV	323284	324113	3.52337	-133		chrXVI	172501	172966	3.15182	21		chrXIII	863640	864124	2.89999	63
chrXII	833438	834134	2.21267	-566		chrXV	158638	159343	3.47195	-182		chrXIV	326099	327012	3.4798	-236		chrXVI	175836	176464	3.1114	-73		chrXIII	865007	865627	2.95293	33
chrXII	841066	841628	3.43774	16		chrXV	181069	181947	4.62364	-81		chrXIV	329174	330950	3.44071	11		chrXVI	179103	179556	3.21322	53		chrXIII	866856	867782	2.89775	-228
chrXII	843801	844500	1.46227	-101		chrXV	184908	185659	2.27928	-154		chrXIV	331861	332713	3.51021	-310		chrXVI	180845	181532	3.18152	-214		chrXIII	869058	869845	2.7439	175
chrXII	845695	846277	1.85336	-117		chrXV	186479	187337	4.72015	-116		chrXIV	339107	339835	3.53177	-124		chrXVI	183100	183622	3.1168	-305		chrXIII	872398	875207	2.79156	534
chrXII	848858	850041	2.72681	229		chrXV	192963	194050	4.11465	35		chrXIV	345901	346563	3.38315	-81		chrXVI	190260	191720	2.83162	-416		chrXIII	892013	892519	2.94935	-45
chrXII	852911	856084	3.7022	436		chrXV	194473	195257	5	-65		chrXIV	348234	349131	3.3272	-162		chrXVI	202287	202719	3.12849	33		chrXIII	895069	895899	2.86587	-58
chrXII	857050	857751	2.58292	-139		chrXV	196134	196827	2.8829	-26		chrXIV	350315	351888	3.51894	162		chrXVI	204778	205449	3.20592	-134		chrXIII	896319	896907	2.82901	56
chrXII	862070	862730	2.79161	-146		chrXV	198353	199359	3.30586	-86		chrXIV	359003	359744	3.47043	-222		chrXVI	207416	208082	3.05987	-408		chrXIII	897357	897801	2.92391	24
chrXII	871081	871788	3.61181	-68		chrXV	204190	204980	2.52128	-114		chrXIV	365565	367009	3.43036	254		chrXVI	211697	212431	3.1835	-94		chrXIII	898061	899098	2.91565	175
chrXII	873244	875260	2.85977	540		chrXV	205555	206307	3.6581	-46		chrXIV	369899	370628	3.39127	-104		chrXVI	218119	218893	3.18064	-124		chrXIII	901017	901953	2.93475	-178
chrXII	877235	878422	2.39889	-453		chrXV	209796	210632	4.05788	51		chrXIV	375027	375738	1.94071	62		chrXVI	222632	223391	3.13511	-131		chrXIV	3053	4009	2.74565	2014
chrXII	879355	880164	2.88354	37		chrXV	211684	212609	5	-97		chrXIV	378218	378992	3.41684	-162		chrXVI	230543	231318	3.12265	-93		chrXIV	9960	13859	2.14706	458
chrXII	884518	885517	3.26085	-267		chrXV	220677	221048	1.32299	96		chrXIV	382304	384165	3.27629	-752		chrXVI	236858	237529	3.18297	-87		chrXIV	14123	15825	2.83785	142
chrXII	892564	893944	4.07608	136		chrXV	222842	223775	3.74944	41		chrXIV	386796	387603	3.34804	-27		chrXVI	239256	239553	3.15672	-328		chrXIV	14123	15825	2.83785	142
chrXII	906160	907335	3.22199	-331		chrXV	230050	230496	3.79733	188		chrXIV	392256	393162	3.42315	-183		chrXVI	241281	241871	3.19914	-79		chrXIV	17001	17698	2.63294	-102
chrXII	912100	912730	2.40744	-105		chrXV	232798	234925	3.17423	-226		chrXIV	394508	394937	3.28166	38		chrXVI	245911	246487	3.03746	21		chrXIV	18842	19797	2.91648	-18
chrXII	914582	915242	2.09137	-20		chrXV	240794	241309	2.28668	258		chrXIV	398012	398474	3.36148	127		chrXVI	246809	247291	3.19931	60		chrXIV	22381	23569	2.93022	299
chrXII	918770	919175	2.55486	46		chrXV	246833	247397	4.12398	-35		chrXIV	400278	401398	3.27411	-202		chrXVI	251565	252333	3.1352	-281		chrXIV	27770	28682	2.93778	121
chrXII	924165	924613	4.07211	59		chrXV	249357	250127	3.2119	-83		chrXIV	405400	406948	3.41718	-184		chrXVI	254197	254909	3.12956	-243		chrXIV	31015	32253	2.68707	-256
chrXII	928363	928979	2.4222	-72		chrXV	252386	253097	2.95554	-96		chrXIV	407470	408602	3.47207	-305		chrXVI	264806	265278	3.20812	14		chrXIV	33946	35062	2.76426	-192
chrXII	929443	930114	2.6788	-10		chrXV	254829	255560	3.53517	-142		chrXIV	411900	413746	3.48346	52		chrXVI	267248	268298	3.06905	-238		chrXIV	37151	38067	2.8229	-91
chrXII	933500	934757	3.75723	124		chrXV	259777	260219	3.23136	75		chrXIV	419594	420303	3.37629	-123		chrXVI	272665	273390	3.00513	-213		chrXIV	40435	40925	2.79948	61
chrXII	936898	937775	4.20558	-104		chrXV	263256	264112	3.31118	209		chrXIV	424267	424902	3.44359	-90		chrXVI	277290	277943	3.20939	-88		chrXIV	42786	43229	2.68166	67
chrXII	947119	948645	3.90183	-486		chrXV	267227	268440	3.16362	-305		chrXIV	429895	430347	3.27301	34		chrXVI	280269	280755	3.17216	32		chrXIV	44014	44952	2.89955	36
chrXII	957883	958680	3.20027	-146		chrXV	273470	274429	3.1894	-226		chrXIV	439035	439636	3.08895	-53		chrXVI	281280	281711	3.20698	-626		chrXIV	47233	48677	2.77464	67
chrXII	963266	963966	2.81546	-169		chrXV	274799	275233	3.08973	59		chrXIV	444647	445008	3.24105	-513		chrXVI	288848	289588	3.09007	-184		chrXIV	55618	56088	2.84816	44
chrXII	965377	966077	3.07388	-167		chrXV	277891	278255	3.04101	17		chrXIV	446749	447581	3.5227	-325		chrXVI	292125	292643	3.03885	43		chrXIV	57344	58559	2.70782	-203
chrXII	972939	973710	2.63529	-70		chrXV	281187	281875	3.46042	-33		chrXIV	450329	451111	3.38025	-151		chrXVI	299425	300074	3.19509	-247		chrXIV	59616	60603	2.86504	-187
chrXII	975648	975973	2.59715	2416		chrXV	285123	285563	3.41981	83		chrXIV	456228	456730	3.50133	-86		chrXVI	301016	301764	3.08898	-162		chrXIV	65862	66933	2.88094	-119
chrXII	986769	987521	3.95553	83		chrXV	288546	289245	2.01473	-2		chrXIV	457449	457966	3.39776	4		chrXVI	304933	305581	3.10394	-41		chrXIV	67631	69003	2.19357	-598
chrXII	987809	988545	3.15563	-251		chrXV	291777	292263	3.72573	54		chrXIV	459147	460041	3.13872	1890		chrXVI	307787	308686	3.1797	-16		chrXIV	76221	77252	2.90782	-154
chrXII	990350	991040	2.68442	-82		chrXV	295762	296701	2.97928	-112		chrXIV	465930	467098	3.52571	180		chrXVI	309423	309754	3.02055	15		chrXIV	80115	80874	2.91892	-145
chrXII	992793	993434	3.31624	-320		chrXV	307487	308266	4.79713	-61		chrXIV	470908	471692	3.44545	-77		chrXVI	310036	310515	3.07815	66		chrXIV	82546	83718	2.94556	326
chrXII	1001543	1002991	2.03887	-290		chrXV	315764	316979	3.65237	-197		chrXIV	473143	473660	3.44652	11		chrXVI	312927	313555	3.19076	-147		chrXIV	85501	86553	2.91553	-191
chrXII	1005814	1006632	3.14279	-155		chrXV	322617	323338	1.65826	16		chrXIV	476357	477111	3.53199	-115		chrXVI	318872	319507	3.09909	-245		chrXIV	87628	88990	2.91793	412
chrXII	1013921	1014776	4.16132	-142		chrXV	326272	327091	4.09691	-150		chrXIV	482917	483571	3.28271	-312		chrXVI	320546	321012	3.20479	-12		chrXIV	89984	90503	2.84597	-59
chrXII	1017491	1018045	2.24481	-71		chrXV	329037	329691	3.50447	-53		chrXIV	485183	485896	3.39652	-67		chrXVI	321878	322381	3.11321	59		chrXIV	91524	92084	2.88199	-190
chrXII	1022010	1022794	3.28139	-151		chrXV	333085	333943	3.86837	-78		chrXIV	490136	490524	3.10888	13		chrXVI	326028	326864	3.18278	-182		chrXIV	95022	95587	2.79141	82
chrXII	1024707	1025358	2.52371	-181		chrXV	346750	347419	3.83049	-135		chrXIV	493139	493607	3.41029	7		chrXVI	335515	336266	3.16172	-57		chrXIV	103749	104559	2.91165	-52
chrXII	1027647	1028232	3.28686	-47		chrXV	349655	350267	3.16168	282		chrXIV	509791	510854	3.30101	-111		chrXVI	348119	349235	3.16215	231		chrXIV	106501	107201	2.85552	-156
chrXII	1029590	1031073	2.48624	-502		chrXV	355388	357679	3.43557	-9		chrXIV	514677	515454	3.51477	-131		chrXVI	355056	355959	3.08862	-96		chrXIV	112529	113326	2.81576	-343
chrXII	1032195	1032799	3.83719	-130		chrXV	360549	361884	3.66776	-133		chrXIV	516612	517528	3.38813	-179		chrXVI	359111	359609	3.12209	46		chrXIV	118637	119670	2.93631	-114
chrXII	1035636	1036325	3.18969	-112		chrXV	363892	364524	2.48776	-161		chrXIV	525053	526353	3.39399	-383		chrXVI	359888	360602	2.23242	36		chrXIV	122103	123406	2.89756	-128
chrXII	1042666	1044105	3.54717	-400		chrXV	373144	373819	3.78627	-43		chrXIV	532455	532926	3.51049	32		chrXVI	361402	362165	3.0727	-88		chrXIV	128836	129344	2.9321	-6
[truncated: 916 more rows]

## Sheet: Supplementary Table S6
ID	Genotype	Description	Source
pMA-2	pRS314[]	Empty vector	[100]
pMA-60	pRS314[HTZ1-FLAG]	Wild-type H2A.Z	This study
pMA-303	pRS314[HTZ1-K3N-FLAG]	H2A.Z K3N mutation	This study
pMA-106	pRS314[HTZ1-S25L-FLAG]	H2A.Z S25L mutation	This study
pMA-77	pRS314[HTZ1-F32Y-FLAG]	H2A.Z F32Y mutation	This study
pMA-72	pRS314[HTZ1-R36H-FLAG]	H2A.Z R36H mutation	This study
pMA-145	pRS314[HTZ1-T46S-FLAG]	H2A.Z T46S mutation	This study
pMA-140	pRS314[HTZ1-A56V-FLAG]	H2A.Z A56V mutation	This study
pMA-131	pRS314[HTZ1-L66F-FLAG]	H2A.Z L66F mutation	This study
pMA-304	pRS314[HTZ1-T67A-FLAG]	H2A.Z T67A mutation	This study
pMA-141	pRS314[HTZ1-N76D-FLAG]	H2A.Z N76D mutation	This study
pMA-108	pRS314[HTZ1-A77T-FLAG]	H2A.Z A77T mutation	This study
pMA-78	pRS314[HTZ1-L81I-FLAG]	H2A.Z L81I mutation	This study
pMA-142	pRS314[HTZ1-L81V-FLAG]	H2A.Z L81V mutation	This study
pMA-132	pRS314[HTZ1-R85C-FLAG]	H2A.Z R85C mutation	This study
pMA-305	pRS314[HTZ1-P88A-FLAG]	H2A.Z P88A mutation	This study
pMA-302	pRS314[HTZ1-R89L-FLAG]	H2A.Z R89L mutation	This study
pMA-133	pRS314[HTZ1-L101W-FLAG]	H2A.Z L101W mutation	This study
pMA-71	pRS314[HTZ1-S103Y-FLAG]	H2A.Z S103Y mutation	This study
pMA-73	pRS314[HTZ1-L104R-FLAG]	H2A.Z L104R mutation	This study
pMA-143	pRS314[HTZ1-I109S-FLAG]	H2A.Z I109S mutation	This study
pMA-146	pRS314[HTZ1-G113C-FLAG]	H2A.Z G113C mutation	This study
pMA-79	pRS314[HTZ1-H117R-FLAG]	H2A.Z H117R mutation	This study
pCM-366	HsH3.2, pDONR/Zeo	HsH3.2 with N-terminal TEV site	This study
pCM-367	HsH4, pDONR/Zeo	HsH4 with N-terminal TEV site	This study
pCM-334	ScH2B.1, pDONR/Zeo	ScH2B.1 with N-terminal TEV site	This study
pCM-331	ScH2A.Z, pDONR/Zeo	ScH2A.Z with N-terminal TEV site	This study
pCM-332	ScH2A.Z F32Y, pDONR/Zeo	ScH2A.Z F32Y with N-terminal TEV site	This study
pCM-333	ScH2A.Z R36H, pDONR/Zeo	ScH2A.Z R36H with N-terminal TEV site	This study
pCM-368	ScH2A.Z L104R, pDONR/Zeo	ScH2A.Z L104R with N-terminal TEV site	This study
pCM-369	HsH3.2, pDEST17	HsH3.2 with N-terminal His6 tag and TEV site	This study
pCM-370	HsH4, pDEST17	HsH4 with N-terminal His6 tag and TEV site	This study
pCM-340	ScH2B.1, pDEST17	ScH2B.1 with N-terminal His6 tag and TEV site	This study
pCM-337	ScH2A.Z, pDEST17	ScH2A.Z with N-terminal His6 tag and TEV site	This study
pCM-338	ScH2A.Z F32Y, pDEST17	ScH2A.Z F32Y with N-terminal His6 tag and TEV site	This study
pCM-339	ScH2A.Z R36H, pDEST17	ScH2A.Z R36H with N-terminal His6 tag and TEV site	This study
pCM-371	ScH2A.Z L104R, pDEST17	ScH2A.Z L104R with N-terminal His6 tag and TEV site	This study
pCM-372	ScGIT1 DNA, pDONR221∆EcoRV	ScGITA promoter sequence that can be excised with EcoRV from the plasmid backbone to obtain a 153 bp fragment	This study

## Sheet: Supplementary Table S7
ID	Purpose	FW/RV	Nucleotide sequence (5’ to 3’)	Reference
MA-PY870	K3N-SDM	FW	AACTTAACATAATGTCAGGAAATGCTCATGGAGGTAAAGGTAA	This study
MA-PY871	K3N-SDM	RV	TTACCTTTACCTCCATGAGCATTTCCTGACATTATGTTAAGTT	This study
MA-PY168	S25L-SDM	FW	CATTGAGATCTCAATCTTCTTTAGCAAGG GCTGGCTTGCAGTT	This study
MA-PY169	S25L-SDM	RV	AACTGCAAGCCAGCCCTTGCTAAAGAAGA TTGAGATCTCAATG	This study
MA-PY156	F32Y-SDM	FW	CAGCAAGGGCTGGCTTGCAGTATCCTGTC GGTAGGATTAAGCG	This study
MA-PY157	F32Y-SDM	RV	CGCTTAATCCTACCGACAGGATACTGCAA GCCAGCCCTTGCTG	This study
MA-PY180	R36H-SDM	FW	GCTTGCAGTTTCCTGTCGGTCACATTAAG CGTTACCTGAAAAG	This study
MA-PY181	R36H-SDM	RV	CTTTTCAGGTAACGCTTAATGTGACCGAC AGGAAACTGCAAGC	This study
MA-PY158	T46S-SDM	FW	GTTACCTGAAAAGGCACGCTTCCGGCCGA ACAAGAGTAGGATC	This study
MA-PY159	T46S-SDM	RV	GATCCTACTCTTGTTCGGCCGGAAGCGTG CCTTTTCAGGTAAC	This study
MA-PY160	A56V-SDM	FW	CAAGAGTAGGATCCAAAGCTGTCATTTAT TTGACTGCTGTGTT	This study
MA-PY161	A56V-SDM	RV	AACACAGCAGTCAAATAAATGACAGCTTT GGATCCTACTCTTG	This study
MA-PY170	L66F-SDM	FW	TGACTGCTGTGTTGGAATATTTTACTGCTG AAGTGCTGGAGTT	This study
MA-PY171	L66F-SDM	RV	AACTCCAGCACTTCAGCAGTAAAATATTC CAACACAGCAGTCA	This study
MA-PY872	T67A-SDM	FW	CTGCTGTGTTGGAATATTTGGCTGCTGAAGTGCTGGAGTTGGC	This study
MA-PY873	T67A-SDM	RV	GCCAACTCCAGCACTTCAGCAGCCAAATATTCCAACACAGCAG	This study
MA-PY166	N76D-SDM	FW	AAGTGCTGGAGTTGGCTGGTGATGCAGCC AAGGATCTTAAAGT	This study
MA-PY167	N76D-SDM	RV	ACTTTAAGATCCTTGGCTGCATCACCAGC CAACTCCAGCACTT	This study
MA-PY172	A77T-SDM	FW	TGCTGGAGTTGGCTGGTAATACAGCCAAG GATCTTAAAGTCAA	This study
MA-PY173	A77T-SDM	RV	TTGACTTTAAGATCCTTGGCTGTATTACCA GCCAACTCCAGCA	This study
MA-PY174	L81I-SDM	FW	CTGGTAATGCAGCCAAGGATATTAAAGTC AAGAGGATTACCCC	This study
MA-PY175	L81I-SDM	RV	GGGGTAATCCTCTTGACTTTAATATCCTTG GCTGCATTACCAG	This study
MA-PY178	L81V-SDM	FW	CTGGTAATGCAGCCAAGGATGTTAAAGTC AAGAGGATTACCCC	This study
MA-PY179	L81V-SDM	RV	GGGGTAATCCTCTTGACTTTAACATCCTTG GCTGCATTACCAG	This study
MA-PY162	R85C-SDM	FW	CCAAGGATCTTAAAGTCAAGTGCATTACC CCAAGACATCTGCA	This study
MA-PY163	R85C-SDM	RV	TGCAGATGTCTTGGGGTAATGCACTTGAC TTTAAGATCCTTGG	This study
MA-PY874	P88A-SDM	FW	TTAAAGTCAAGAGGATTACCGCAAGACATCTGCAATTGGCCAT	This study
MA-PY875	P88A-SDM	RV	ATGGCCAATTGCAGATGTCTTGCGGTAATCCTCTTGACTTTAA	This study
MA-PY876	R89L-SDM	FW	AAGTCAAGAGGATTACCCCATTGCATCTGCAATTGGCCATTAG	This study
MA-PY877	R89L-SDM	RV	CTAATGGCCAATTGCAGATGCAATGGGGTAATCCTCTTGACTT	This study
MA-PY186	L101W-SDM	FW	CCATTAGAGGTGACGATGAGTGGGATTCT TTGATCAGGGCTAC	This study
MA-PY187	L101W-SDM	RV	GTAGCCCTGATCAAAGAATCCCACTCATC GTCACCTCTAATGG	This study
MA-PY152	S103Y-SDM	FW	GAGGTGACGATGAGTTAGATTATTTGATC AGGGCTACAATTGC	This study
MA-PY153	S103Y-SDM	RV	GCAATTGTAGCCCTGATCAAATAATCTAA CTCATCGTCACCTC	This study
MA-PY184	L104R-SDM	FW	GTGACGATGAGTTAGATTCTAGGATCAGG GCTACAATTGCTTC	This study
MA-PY185	L104R-SDM	RV	GAAGCAATTGTAGCCCTGATCCTAGAATC TAACTCATCGTCAC	This study
MA-PY176	I109S-SDM	FW	ATTCTTTGATCAGGGCTACATCTGCTTCAG GTGGTGTTTTGCC	This study
MA-PY177	I109S-SDM	RV	GGCAAAACACCACCTGAAGCAGATGTAG CCCTGATCAAAGAAT	This study
MA-PY188	G113C-SDM	FW	GGGCTACAATTGCTTCAGGTTGTGTTTTGC CTCATATAAATAAAG	This study
MA-PY189	G113C-SDM	RV	TTATTTATATGAGGCAAAACACAACCTGA AGCAATTGTAGCCC	This study
MA-PY182	H117R-SDM	FW	CTTCAGGTGGTGTTTTGCCTCGTATAAATA AAGCATTATTATTG	This study
MA-PY183	H117R-SDM	RV	AATAATAATGCTTTATTTATACGAGGCAA AACACCACCTGAAG	This study
MA-PY63	ACT1-RT qPCR	FW	TCTTGGTGGTGGTACTGGTT	[48]
MA-PY64	ACT1-RT qPCR	RV	TGGATTTCTTACCGTATTCAGCG	[48]
MA-PY344	GIT1-RT qPCR	FW	ATCGGTTCTGTAGTAGGCG	[48]
MA-PY345	GIT1-RT qPCR	RV	TTACCAGTCCAGCCATTGG	[48]
MA-P346	RDS1 RT-qPCR	FW	AAGCCGTGAGATTGAAATGG	[48]
MA-P347	RDS1 RT-qPCR	RV	CTCCATCTGGCACAACAGAA	[48]
MA-P348	YCR100C RT-qPCR	FW	CCAGATGGATCAGGCTCAAA	[48]
MA-P349	YCR100C RT-qPCR	RV	TCGATCGCATACAGGACACT	[48]
MA-P670	ALD5 RT-qPCR	FW	GGAGGAAGTGTTTGGTCCCAT	[48]
MA-P671	ALD5 RT-qPCR	RV	ACCTGCGGCTAACCCATATT	[48]
MA-P354	GIT1-ChIP-qPCR	FW	TTCATGAATTTCCTTACTGGAC	[48]
MA-P355	GIT1-ChIP-qPCR	RV	GTTGACTAGTCACAAGAAACAG	[48]
MA-P358	RDS1-ChIP-qPCR	FW	TGTGCTATCTAAGAGGATGGTTCA	[48]
MA-P359	RDS1-ChIP-qPCR	RV	CAGCAGCCAATTTCATGTTC	[48]
MA-P362	YCR100C-ChIP-qPCR	FW	GCAAGGATTCTGACTTTACTGG	[48]
MA-P363	YCR100C-ChIP-Qpcr	RV	CTCGTTATGCCCGTCATCTT	[48]
MA-P837	Rpb3 spike-in ChIP-qPCR	FW	CTCTAGAACATACGTTATTTAATCTCGA	This study
MA-P838	Rpb3 spike-in ChIP-qPCR	RV	GTATTACCGACAATAGAAAAGGGG	This study
MA-P390	Htz1 KO	FW	AATTTCGCACTATAGCCGCACGTAAAAATAACTTAACATAACATGGAGGCCCAGAATACCCT	This study
MA-P391	Htz1 KO	RV	AGGGAGAATTACGGGAAATGGGAAAGAAAAACTATTCTTCCAGTATAGCGACCAGCATTCAC	This study
MA-P392	FLAG tagging of HTZ1	FW	AGCATTATTATTGAAAGTGGAAAAAAAGGGAAGTAAGAAACGGATCCCCGGGTTAATTAA	This study
MA-P393	FLAG tagging of HTZ1	RV	AGGGAGAATTACGGGAAATGGGAAAGAAAAACTATTCTTCGAATTCGAGCTCGTTTAAAC	This study
MA-P394	HTZ1 C	N/A	CCGGCCGAACAAGAGTAGGATCC	This study
MA-P395	HTZ1 A	N/A	CCTCGGAGGTGTTACCCGCAA	This study
MA-P396	HTZ1 B	N/A	CCTGAAGCAATTGTAGCCCTGATC	This study

## Sheet: Supplementary Table S8
Strain	Genotype	Source
MAY1	W303 MATα ade2Δ1 can1-100 his3-11 leu2-3,112 trp1-1 ura3-1 LYS2
MAY2	W303 MATA ADE2 can1-100 his3-11 leu2-3,112 trp1-1 ura3-1 lys2D
MAY118	MAY1, htz1Δ::HYGMX	[48]
MAY144	MAY1, htz1Δ::HYGMX, pRS314[]	This study
MAY194	MAY1, htz1Δ::HYGMX, pRS314[HTZ1-FLAG]	This study
MAY948	MAY1, htz1Δ::HYGMX, pRS314[htz1-K3N-FLAG]	This study
MAY196	MAY1, htz1Δ::HYGMX, pRS314[htz1-S25L-FLAG]	This study
MAY197	MAY1, htz1Δ::HYGMX, pRS314[htz1-F32Y-FLAG]	This study
MAY198	MAY1, htz1Δ::HYGMX, pRS314[htz1-R36H-FLAG]	This study
MAY342	MAY1, htz1Δ::HYGMX, pRS314[htz1-T46S-FLAG]	This study
MAY343	MAY1, htz1Δ::HYGMX, pRS314[htz1-A56V-FLAG]	This study
MAY261	MAY1, htz1Δ::HYGMX, pRS314[htz1-L66F-FLAG]	This study
MAY949	MAY1, htz1Δ::HYGMX, pRS314[htz1-T67A-FLAG]	This study
MAY344	MAY1, htz1Δ::HYGMX, pRS314[htz1-N76D-FLAG]	This study
MAY200	MAY1, htz1Δ::HYGMX, pRS314[htz1-A77T-FLAG]	This study
MAY201	MAY1, htz1Δ::HYGMX, pRS314[htz1-L81I-FLAG]	This study
MAY345	MAY1, htz1Δ::HYGMX, pRS314[htz1-L81V-FLAG]	This study
MAY262	MAY1, htz1Δ::HYGMX, pRS314[htz1-R85C-FLAG]	This study
MAY950	MAY1, htz1Δ::HYGMX, pRS314[htz1-P88A-FLAG]	This study
MAY951	MAY1, htz1Δ::HYGMX, pRS314[htz1-R89L-FLAG]	This study
MAY263	MAY1, htz1Δ::HYGMX, pRS314[htz1-L101W-FLAG]	This study
MAY204	MAY1, htz1Δ::HYGMX, pRS314[htz1-S103Y-FLAG]	This study
MAY205	MAY1, htz1Δ::HYGMX, pRS314[htz1-L104R-FLAG]	This study
MAY346	MAY1, htz1Δ::HYGMX, pRS314[htz1-I109S-FLAG]	This study
MAY347	MAY1, htz1Δ::HYGMX, pRS314[htz1-G113C-FLAG]	This study
MAY206	MAY1, htz1Δ::HYGMX, pRS314[htz1-H117R-FLAG]	This study
MAY264	MAY1, htz1Δ::HYGMX, pRS314[htz1-L123T-FLAG]	This study
MAY796	MAY1, htz1Δ::HYGMX, SWC3–VSV::KANMX	[25]
MAY806	MAY1, htz1Δ::HYGMX, SWC3–VSV::KANMX pRS314[]	This study
MAY809	MAY1, htz1Δ::HYGMX, SWC3–VSV::KANMX, pRS314[HTZ1-FLAG]	This study
MAY812	MAY1, htz1Δ::HYGMX, SWC3–VSV::KANMX, pRS314[htz1-R36H-FLAG]	This study
MAY815	MAY1, htz1Δ::HYGMX, SWC3–VSV::KANMX, pRS314[htz1-T46S-FLAG]	This study
MAY818	MAY1, htz1Δ::HYGMX, SWC3–VSV::KANMX, pRS314[htz1-L66F-FLAG]	This study
MAY821	MAY1, htz1Δ::HYGMX, SWC3–VSV::KANMX, pRS314[htz1-L101W-FLAG]	This study
MAY824	MAY1, htz1Δ::HYGMX, SWC3–VSV::KANMX, pRS314[htz1-L104R-FLAG]	This study
MAY827	MAY1, htz1Δ::HYGMX, SWC3–VSV::KANMX, pRS314[htz1-I109S-FLAG]	This study
MAP1	Schizosaccharomyces pombe, h- Rpb3-FLAG::HYGMX	[105]
MAY48	MAY1, pRS314[]	This study
MAY947	MAY2, swr1Δ::HIS, pRS314[]	This study
MAY939	MAY2, htz1Δ::HYGMX, swr1Δ::HIS, pRS314[]	This study
MAY942	MAY2, htz1Δ::HYGMX, swr1Δ::HIS, pRS314[HTZ1-FLAG]	This study
MAY945	MAY2, htz1Δ::HYGMX, swr1Δ::HIS, pRS314[htz1-R36H-FLAG]	This study
MAY940	MAY2, htz1Δ::HYGMX, swr1Δ::HIS, pRS314[htz1-T46S-FLAG]	This study
MAY944	MAY2, htz1Δ::HYGMX, swr1Δ::HIS, pRS314[htz1-L66F-FLAG]	This study
MAY946	MAY2, htz1Δ::HYGMX, swr1Δ::HIS, pRS314[htz1-L101W-FLAG]	This study
MAY943	MAY2, htz1Δ::HYGMX, swr1Δ::HIS, pRS314[htz1-L104R-FLAG]	This study
MAY941	MAY2, htz1Δ::HYGMX, swr1Δ::HIS, pRS314[htz1-I109S-FLAG]	This study

## Sheet: Supplementary Table S9
Name	Sequence (5'-3')	Reference
HsH3.2	GGGGACAAGTTTGTACAAAAAAGCAGGCTTCGAAAACCTGTATTTTCAAGCCCGCACGAAACAGACTGCCCGTAAATCAACTGGGGGAAAAGCGCCTCGCAAACAGCTGGCGACTAAGGCGGCCCGCAAGAGCGCACCAGCGACTGGTGGGGTCAAAAAGCCGCACCGTTACCGCCCAGGCACTGTAGCTCTGCGCGAGATCCGCCGCTATCAAAAGTCAACGGAGCTGTTGATTCGCAAATTACCGTTTCAACGTCTTGTCCGCGAGATCGCCCAAGACTTCAAAACTGATTTGCGTTTCCAGTCCTCAGCCGTTATGGCTTTACAGGAAGCGTCAGAAGCGTACTTGGTCGGGTTGTTCGAAGATACTAACTTGTGTGCTATCCACGCCAAGCGTGT…	This study
HsH4	GGGGACAAGTTTGTACAAAAAAGCAGGCTTCGAAAACTTATATTTTCAGTCGGGACGCGGAAAAGGGGGGAAAGGGCTGGGAAAGGGAGGTGCCAAGCGTCACCGTAAGGTATTGCGTGACAATATCCAAGGTATTACGAAACCGGCAATCCGCCGCCTTGCTCGTCGCGGTGGGGTGAAACGTATTTCTGGACTTATTTATGAGGAAACGCGCGGAGTATTAAAGGTGTTTTTGGAGAATGTCATTCGTGACGCCGTTACATATACCGAGCACGCTAAGCGTAAGACTGTAACGGCCATGGATGTCGTATATGCCTTGAAACGCCAAGGACGCACTCTGTATGGATTTGGCGGCTAGTAGGACCCAGCTTTCTTGTACAAAGTGGTCCCC	This study
ScH2B.1	GGGGACAAGTTTGTACAAAAAAGCAGGCTTCGAAAATCTTTACTTTCAATCCGCGAAGGCTGAGAAGAAGCCGGCTAGTAAAGCACCAGCAGAGAAAAAGCCTGCCGCTAAGAAGACATCAACGTCTACGGACGGGAAGAAGCGGTCCAAGGCACGCAAAGAGACATACTCCAGTTACATCTACAAAGTTTTGAAACAGACTCATCCAGACACCGGGATTTCACAGAAAAGTATGAGTATTTTAAACTCATTCGTAAACGACATCTTCGAGCGCATTGCGACGGAAGCGTCGAAATTAGCAGCGTACAATAAAAAATCAACAATTTCTGCCCGCGAAATCCAGACAGCGGTTCGTTTGATCCTGCCTGGCGAGTTAGCTAAGCACGCAGTTAGCGAAGG…	This study
ScH2A.Z	GGGGACAAGTTTGTACAAAAAAGCAGGCTTCGAGAACCTCTATTTCCAAAGTGGCAAAGCCCATGGTGGGAAGGGTAAAAGCGGCGCTAAAGACTCTGGGTCCCTCCGTTCACAGTCAAGTAGTGCCCGTGCGGGTTTGCAGTTTCCGGTTGGCCGCATTAAGCGTTATCTCAAGCGCCATGCTACTGGTCGGACCCGCGTAGGGTCCAAAGCTGCCATTTACCTGACCGCTGTATTGGAATACTTAACAGCAGAGGTTTTAGAATTAGCCGGGAATGCTGCTAAGGACCTCAAGGTGAAGCGTATTACACCGCGTCACCTTCAGCTCGCCATCCGGGGTGATGATGAACTCGATAGCCTCATTCGGGCAACCATTGCAAGTGGTGGCGTTTTGCCTCA…	This study
ScH2A.Z F32Y	GGGGACAAGTTTGTACAAAAAAGCAGGCTTCGAGAATCTCTATTTTCAATCAGGCAAGGCTCATGGTGGGAAAGGCAAATCTGGGGCTAAAGACAGCGGCTCACTTCGGTCGCAGTCTTCATCAGCTCGTGCTGGGCTTCAGTATCCAGTGGGCCGTATTAAGCGGTATCTCAAGCGTCATGCGACTGGGCGGACGCGGGTAGGGTCGAAAGCAGCAATCTACCTGACGGCGGTGTTGGAATACTTGACGGCTGAAGTTCTCGAACTGGCTGGCAACGCTGCCAAGGATTTGAAGGTTAAGCGGATCACACCTCGTCATCTGCAACTTGCAATTCGGGGCGATGATGAGCTGGACAGTCTGATTCGGGCTACTATTGCATCAGGCGGGGTCCTGCCACA…	This study
ScH2A.Z R36H	GGGGACAAGTTTGTACAAAAAAGCAGGCTTCGAAAATCTCTATTTCCAGTCGGGCAAAGCCCACGGTGGCAAGGGTAAGTCTGGGGCTAAAGATTCTGGCTCTCTTCGCTCACAATCCTCATCGGCTCGGGCCGGGCTCCAATTTCCAGTAGGTCACATTAAGCGCTACTTAAAGCGCCATGCCACTGGGCGGACCCGTGTAGGGAGTAAGGCGGCAATTTATCTGACAGCAGTCCTTGAGTACCTGACTGCTGAAGTTTTAGAATTAGCGGGGAATGCAGCCAAAGACCTGAAGGTTAAACGGATCACACCTCGGCATTTACAGCTCGCGATTCGGGGGGACGATGAACTGGACTCTCTTATTCGTGCAACCATCGCTAGCGGCGGGGTCCTTCCTCA…	This study
ScH2A.Z L104R	GGGGACAAGTTTGTACAAAAAAGCAGGCTTCGAAAACCTCTATTTCCAATCAGGGAAGGCTCATGGGGGCAAGGGGAAGTCGGGTGCTAAGGATTCAGGTTCGCTGCGGAGCCAATCGAGCAGTGCCCGGGCAGGGTTACAATTTCCTGTAGGCCGCATCAAACGTTATTTGAAACGGCACGCAACTGGTCGGACACGGGTTGGCTCGAAAGCTGCGATTTACTTGACAGCGGTCCTTGAGTATCTGACTGCGGAGGTTCTGGAACTCGCAGGTAACGCTGCAAAAGACCTCAAAGTAAAGCGCATTACCCCTCGGCACTTACAACTTGCTATTCGGGGCGATGACGAGCTTGATTCGCGTATCCGCGCAACTATCGCTTCGGGGGGTGTTCTTCCGCA…	This study
ScGIT1 DNA	GGGGACAAGTTTGTACAAAAAAGCAGGCTTCGATATCAGGTGGGGGTCCAGTAAGGAAATTCATGAATATGAAGATAAATGTGGCACCAAACGGCAACGCGGAAGACCGTAGGATCCAATCATATAACCCCTATTATTCTAACATCATTGCTGTTGGGTACAACATTCTACGCCGCTATTACTAGATATCGACCCAGCTTTCTTGTACAAAGTGGTCCCC	This study
